# Supplementary material for: Analyses of long non-coding RNA and mRNA profiling in the spleen of diarrheic piglets caused by Clostridium perfringens type C
Source: PeerJ. 2018 Nov 30;6:e5997. doi: 10.7717/peerj.5997 (PMC6276591; doi:10.7717/peerj.5997)
Supplement: Supplemental Information 1 [file peerj-06-5997-s001.xlsx]

## Sheet: qualitiy control of data
	Sample name	Raw reads	Clean reads	Clean reads/Raw reads	Clean bases	Error rate(%)	Q20(%)	Q30(%)	GC content(%)
SC	SC1	95751480	90208820	0.942114	13.53G	0.02	95.59	89.52	44.55
	SC2	86889102	82767928	0.95257	12.42G	0.02	96.14	90.46	43.09
	SC3	106266550	100730846	0.947907	15.11G	0.02	96.46	91.28	42.73
	SC4	107883328	97995070	0.908343	14.7G	0.02	95.92	90.26	47
	SC5	99402506	95148240	0.957202	14.27G	0.03	94.56	86.59	45.77
SR	SR1	96929888	86531694	0.892725	12.98G	0.02	96.61	91.54	48.68
	SR2	95334206	89723370	0.941146	13.46G	0.02	96.45	91.18	46.2
	SR3	97844270	93224824	0.952788	13.98G	0.02	96.34	90.81	45.76
	SR4	108378026	101189984	0.933676	15.18G	0.02	96.46	91.22	46.91
	SR5	102518954	98263090	0.958487	14.74G	0.03	94.78	87.04	45.14
SS	SS1	104034964	101648018	0.977056	14.86G	0.03	94.68	87.22	47.04
	SS2	103646484	97891196	0.944472	14.68G	0.02	96.3	90.94	48.12
	SS3	127025158	122744872	0.966304	18.06G	0.03	94.57	87.2	46.18
	SS4	84306532	81538446	0.967166	12.23G	0.02	95.14	88.2	49.32
	SS5	114526448	110686086	0.966467	16.6G	0.02	96.88	92.3	45.27
	total	1530737896	1450292484		216.8G

## Sheet: alignment to the genome
Sample name	Raw reads	Total reads (clean reads)		Total mapped				Multiple mapped		Uniquely mapped
SC1	95751480	90208820		67308513	0.7461		0.2539	5938112	0.0658	61370401	0.6803
SC2	86889102	82767928		63438062	0.7665		0.2335	5646540	0.0682	57791522	0.6982
SC3	106266550	100730846		78015984	0.7745		0.2255	6967834	0.0692	71048150	0.7053
SC4	107883328	97995070		69163399	0.7058		0.2942	6080851	0.0621	63082548	0.6437
SC5	99402506	95148240	466850904	70595668	0.742	348521626	0.258	6051820	0.0636	64543848	0.6784
SR1	96929888	86531694		63822658	0.7376		0.2624	6573284	0.076	57249374	0.6616
SR2	95334206	89723370		69008816	0.7691		0.2309	6032007	0.0672	62976809	0.7019
SR3	97844270	93224824		69221177	0.7425		0.2575	6538204	0.0701	62682973	0.6724
SR4	108378026	101189984		77352048	0.7644		0.2356	7061108	0.0698	70290940	0.6946
SR5	102518954	98263090	468932962	73069338	0.7436	352474037	0.2564	6611531	0.0673	66457807	0.6763
SS1	104034964	101648018		74697335	0.7349		0.2651	6985457	0.0687	67711878	0.6661
SS2	103646484	97891196		75048409	0.7667		0.2333	7440837	0.076	67607572	0.6906
SS3	127025158	122744872		89483871	0.729		0.271	8849109	0.0721	80634762	0.6569
SS4	84306532	81538446		60435966	0.7412		0.2588	8086324	0.0992	52349642	0.642
SS5	114526448	110686086	514508618	85563776	0.773	385229357	0.227	7564078	0.0683	77999698	0.7047
	1530737896	1450292484		1086225020	0.749127

## Sheet: mappedfeature
Samples	SC1	SC2	SC3	SC4	SC5	SR1	SR2	SR3	SR4	SR5	SS1	SS2	SS3	SS4	SS5
IG_C_gene	3124 (0.01%)	2587 (0.01%)	5234 (0.01%)	2681 (0.01%)	3465 (0.01%)	4511 (0.01%)	6071 (0.02%)	7226 (0.02%)	7704 (0.02%)	9116 (0.03%)	5601 (0.02%)	6515 (0.02%)	15953 (0.04%)	5919 (0.02%)	4389 (0.01%)
IG_J_gene	232 (0.00%)	127 (0.00%)	166 (0.00%)	183 (0.00%)	206 (0.00%)	118 (0.00%)	223 (0.00%)	215 (0.00%)	261 (0.00%)	349 (0.00%)	101 (0.00%)	209 (0.00%)	422 (0.00%)	229 (0.00%)	171 (0.00%)
IG_V_gene	4729 (0.01%)	3347 (0.01%)	4723 (0.01%)	2267 (0.01%)	2451 (0.01%)	2431 (0.01%)	5219 (0.02%)	6778 (0.02%)	2332 (0.01%)	7805 (0.02%)	4718 (0.01%)	4744 (0.01%)	7667 (0.02%)	5321 (0.02%)	2125 (0.01%)
IG_V_pseudogene	0 (0.00%)	5 (0.00%)	10 (0.00%)	5 (0.00%)	7 (0.00%)	8 (0.00%)	4 (0.00%)	4 (0.00%)	7 (0.00%)	15 (0.00%)	11 (0.00%)	7 (0.00%)	13 (0.00%)	20 (0.00%)	9 (0.00%)
Mt_rRNA	119074 (0.37%)	93245 (0.31%)	90054 (0.24%)	278989 (0.85%)	28964 (0.08%)	25633 (0.08%)	22065 (0.07%)	27467 (0.08%)	25752 (0.07%)	29456 (0.08%)	21317 (0.06%)	22538 (0.06%)	30937 (0.07%)	10369 (0.04%)	27501 (0.07%)
Mt_tRNA	306 (0.00%)	124 (0.00%)	277 (0.00%)	807 (0.00%)	35 (0.00%)	101 (0.00%)	60 (0.00%)	73 (0.00%)	115 (0.00%)	25 (0.00%)	134 (0.00%)	39 (0.00%)	145 (0.00%)	30 (0.00%)	69 (0.00%)
antisense	607 (0.00%)	534 (0.00%)	650 (0.00%)	563 (0.00%)	412 (0.00%)	443 (0.00%)	471 (0.00%)	370 (0.00%)	358 (0.00%)	469 (0.00%)	296 (0.00%)	505 (0.00%)	413 (0.00%)	239 (0.00%)	768 (0.00%)
lincRNA	3163 (0.01%)	2371 (0.01%)	2291 (0.01%)	2711 (0.01%)	2976 (0.01%)	1621 (0.01%)	2627 (0.01%)	1746 (0.01%)	2663 (0.01%)	2178 (0.01%)	2334 (0.01%)	2500 (0.01%)	4535 (0.01%)	2301 (0.01%)	3335 (0.01%)
miRNA	97639 (0.30%)	44853 (0.15%)	31473 (0.09%)	263361 (0.80%)	63781 (0.18%)	356292 (1.18%)	122836 (0.37%)	152256 (0.46%)	306415 (0.83%)	52910 (0.15%)	77538 (0.21%)	119681 (0.34%)	96391 (0.22%)	112690 (0.40%)	85004 (0.21%)
misc_RNA	424161 (1.32%)	386528 (1.28%)	552036 (1.49%)	225640 (0.68%)	2308011 (6.59%)	1344883 (4.45%)	1297474 (3.93%)	795008 (2.41%)	1129583 (3.06%)	1655326 (4.60%)	2125352 (5.81%)	1424525 (3.99%)	1808624 (4.13%)	1748351 (6.27%)	402548 (1.00%)
non_coding	27 (0.00%)	36 (0.00%)	36 (0.00%)	50 (0.00%)	29 (0.00%)	14 (0.00%)	35 (0.00%)	28 (0.00%)	52 (0.00%)	32 (0.00%)	21 (0.00%)	33 (0.00%)	45 (0.00%)	25 (0.00%)	36 (0.00%)
processed_transcript	92949 (0.29%)	91938 (0.30%)	114107 (0.31%)	85966 (0.26%)	104752 (0.30%)	79314 (0.26%)	95683 (0.29%)	87577 (0.27%)	101435 (0.27%)	106244 (0.29%)	119579 (0.33%)	97122 (0.27%)	129475 (0.30%)	80561 (0.29%)	123709 (0.31%)
protein_coding	18733405 (58.43%)	17972636 (59.37%)	22110482 (59.74%)	18255491 (55.32%)	20292966 (57.94%)	17363284 (57.51%)	19467459 (58.96%)	19865352 (60.28%)	21794364 (58.98%)	21249077 (58.99%)	21728988 (59.36%)	20920209 (58.57%)	26187205 (59.85%)	16034792 (57.54%)	23269865 (57.76%)
pseudogene	22772 (0.07%)	20695 (0.07%)	28872 (0.08%)	25947 (0.08%)	26915 (0.08%)	26640 (0.09%)	27032 (0.08%)	29085 (0.09%)	32320 (0.09%)	29526 (0.08%)	36757 (0.10%)	29733 (0.08%)	42703 (0.10%)	22089 (0.08%)	27578 (0.07%)
rRNA	18339 (0.06%)	9337 (0.03%)	12912 (0.03%)	18901 (0.06%)	16073 (0.05%)	2469 (0.01%)	1584 (0.00%)	1801 (0.01%)	2473 (0.01%)	6628 (0.02%)	2113 (0.01%)	1709 (0.00%)	2267 (0.01%)	3260 (0.01%)	4203 (0.01%)
snRNA	654 (0.00%)	582 (0.00%)	793 (0.00%)	755 (0.00%)	1018 (0.00%)	1634 (0.01%)	980 (0.00%)	836 (0.00%)	998 (0.00%)	1011 (0.00%)	1530 (0.00%)	980 (0.00%)	1188 (0.00%)	1174 (0.00%)	970 (0.00%)
snoRNA	9092 (0.03%)	6329 (0.02%)	7296 (0.02%)	10151 (0.03%)	10657 (0.03%)	17752 (0.06%)	12022 (0.04%)	13016 (0.04%)	13201 (0.04%)	9227 (0.03%)	14902 (0.04%)	11324 (0.03%)	18145 (0.04%)	24960 (0.09%)	7784 (0.02%)
Others	12528819 (39.08%)	11639247 (38.45%)	14051625 (37.96%)	13827133 (41.90%)	12162928 (34.73%)	10966802 (36.32%)	11958515 (36.22%)	11968064 (36.31%)	13531127 (36.62%)	12861801 (35.71%)	12465504 (34.05%)	13077957 (36.61%)	15410063 (35.22%)	9814474 (35.22%)	16329430 (40.53%)
