# Supplementary material for: Analyses of long non-coding RNA and mRNA profiling in the spleen of diarrheic piglets caused by Clostridium perfringens type C
Source: PeerJ. 2018 Nov 30;6:e5997. doi: 10.7717/peerj.5997 (PMC6276591; doi:10.7717/peerj.5997)
Supplement: Supplemental Information 3 [file peerj-06-5997-s003.xlsx]

## Sheet: DGEs(lncRNA) 
Transcript_id	Gene_id	Gene_type
LNC_000646	XLOC_038678	lincRNA
LNC_000648	XLOC_038804	lincRNA
LNC_000910	XLOC_053192	lincRNA
ALDBSSCT0000011254	ALDBSSCG0000006835	lincRNA
LNC_000213	XLOC_012767	lincRNA
LNC_001348	XLOC_080113	lincRNA
LNC_000367	XLOC_022797	lincRNA
LNC_001109	XLOC_066970	lincRNA
ALDBSSCT0000009428	ALDBSSCG0000005751	lincRNA
ALDBSSCT0000008921	ALDBSSCG0000005453	lincRNA
LNC_001777	XLOC_105415	lincRNA
LNC_000403	XLOC_024951	lincRNA
ALDBSSCT0000008144	ALDBSSCG0000004944	lincRNA
ALDBSSCT0000006030	ALDBSSCG0000003690	lincRNA
ALDBSSCT0000009394	ALDBSSCG0000005728	lincRNA
LNC_001830	XLOC_108599	lincRNA
LNC_001831	XLOC_108608	lincRNA
ALDBSSCT0000010050	ALDBSSCG0000006113	lincRNA
ALDBSSCT0000001727	ALDBSSCG0000001044	lincRNA
ALDBSSCT0000002779	ALDBSSCG0000001685	lincRNA
LNC_000191	XLOC_011580	lincRNA
ALDBSSCT0000002338	ALDBSSCG0000001414	lincRNA
ALDBSSCT0000005553	ALDBSSCG0000003361	lincRNA
LNC_001546	XLOC_090487	lincRNA
LNC_001462	XLOC_085571	lincRNA
ALDBSSCT0000000411	ALDBSSCG0000000240	lincRNA
LNC_000715	XLOC_042531	antisense_lncRNA
LNC_001313	XLOC_078871	lincRNA
ALDBSSCT0000005503	ALDBSSCG0000003335	lincRNA
LNC_000390	XLOC_024622	lincRNA
LNC_000108	XLOC_006921	lincRNA
LNC_000065	XLOC_004357	lincRNA
ALDBSSCT0000011245	ALDBSSCG0000006829	lincRNA
LNC_001065	XLOC_064212	lincRNA
LNC_001048	XLOC_062631	lincRNA
LNC_001289	XLOC_077196	lincRNA
ALDBSSCT0000010700	ALDBSSCG0000006479	lincRNA
ALDBSSCT0000003338	ALDBSSCG0000002008	lincRNA
ALDBSSCT0000000808	ALDBSSCG0000000492	lincRNA
LNC_000263	XLOC_016001	lincRNA
LNC_001216	XLOC_073257	lincRNA
ALDBSSCT0000008407	ALDBSSCG0000005106	lincRNA
LNC_001212	XLOC_072636	antisense_lncRNA
ALDBSSCT0000004587	ALDBSSCG0000002789	lincRNA
LNC_001987	XLOC_118880	lincRNA
LNC_000312	XLOC_018389	lincRNA
LNC_001989	XLOC_119040	lincRNA
LNC_000557	XLOC_034276	lincRNA
ALDBSSCT0000003754	ALDBSSCG0000002250	lincRNA
LNC_000317	XLOC_018600	lincRNA
ALDBSSCT0000009643	ALDBSSCG0000005884	lincRNA
LNC_000993	XLOC_059628	lincRNA
ALDBSSCT0000005859	ALDBSSCG0000003564	lincRNA
ALDBSSCT0000004488	ALDBSSCG0000002734	lincRNA
ALDBSSCT0000003229	ALDBSSCG0000001944	lincRNA
LNC_001798	XLOC_106755	lincRNA
LNC_002056	XLOC_123708	lincRNA
ALDBSSCT0000006510	ALDBSSCG0000003978	lincRNA
ALDBSSCT0000002757	ALDBSSCG0000001672	lincRNA
LNC_001797	XLOC_106684	lincRNA
LNC_001536	XLOC_089992	lincRNA
LNC_001410	XLOC_083675	lincRNA
LNC_000979	XLOC_058815	lincRNA
ALDBSSCT0000001964	ALDBSSCG0000001183	lincRNA
ALDBSSCT0000002609	ALDBSSCG0000001587	lincRNA
ALDBSSCT0000005151	ALDBSSCG0000003106	lincRNA
LNC_001097	XLOC_065996	lincRNA
LNC_000071	XLOC_005089	lincRNA
ALDBSSCT0000011407	ALDBSSCG0000006936	lincRNA
LNC_001203	XLOC_071881	lincRNA
LNC_000422	XLOC_026187	lincRNA
LNC_000359	XLOC_021946	lincRNA
LNC_001205	XLOC_071909	lincRNA
ALDBSSCT0000004973	ALDBSSCG0000003010	lincRNA
LNC_001163	XLOC_070182	lincRNA
LNC_000988	XLOC_059465	lincRNA
ALDBSSCT0000008940	ALDBSSCG0000005470	lincRNA
LNC_000423	XLOC_026318	lincRNA
ENSSSCT00000034061	ENSSSCG00000001228	processed_transcript
LNC_000860	XLOC_050720	lincRNA
LNC_001915	XLOC_114707	lincRNA
ENSSSCT00000017310	ENSSSCG00000015897	processed_transcript
LNC_000866	XLOC_050924	lincRNA
LNC_000965	XLOC_057324	lincRNA
ALDBSSCT0000007057	ALDBSSCG0000004290	lincRNA
LNC_002055	XLOC_123653	lincRNA
ALDBSSCT0000002748	ALDBSSCG0000001669	lincRNA
ALDBSSCT0000010721	ALDBSSCG0000006488	lincRNA
ALDBSSCT0000011890	ALDBSSCG0000007231	lincRNA
ALDBSSCT0000006043	ALDBSSCG0000003699	lincRNA
LNC_000630	XLOC_038273	lincRNA
LNC_001084	XLOC_065251	lincRNA
ALDBSSCT0000004117	ALDBSSCG0000002479	lincRNA
LNC_001198	XLOC_071277	lincRNA
ALDBSSCT0000000706	ALDBSSCG0000000419	lincRNA
ALDBSSCT0000007894	ALDBSSCG0000004779	lincRNA
LNC_000111	XLOC_007013	lincRNA
LNC_001170	XLOC_070482	antisense_lncRNA
ALDBSSCT0000002211	ALDBSSCG0000001324	lincRNA
ENSSSCT00000018610	ENSSSCG00000017092	processed_transcript
LNC_000241	XLOC_014614	lincRNA
ALDBSSCT0000002106	ALDBSSCG0000001267	lincRNA
ALDBSSCT0000010092	ALDBSSCG0000006144	lincRNA
LNC_000330	XLOC_020335	lincRNA
LNC_001840	XLOC_109344	lincRNA
LNC_000538	XLOC_032970	lincRNA
LNC_000539	XLOC_033010	lincRNA
ALDBSSCT0000007692	ALDBSSCG0000004671	lincRNA
ALDBSSCT0000009664	ALDBSSCG0000005898	lincRNA
ALDBSSCT0000001886	ALDBSSCG0000001141	lincRNA
ALDBSSCT0000008507	ALDBSSCG0000005173	lincRNA
ALDBSSCT0000006453	ALDBSSCG0000003937	lincRNA
LNC_000814	XLOC_048005	lincRNA
LNC_001149	XLOC_069102	lincRNA
ALDBSSCT0000001860	ALDBSSCG0000001123	lincRNA
LNC_000607	XLOC_036808	lincRNA
LNC_000600	XLOC_036464	lincRNA
ALDBSSCT0000000914	ALDBSSCG0000000560	lincRNA
ALDBSSCT0000010639	ALDBSSCG0000006455	lincRNA
ALDBSSCT0000003041	ALDBSSCG0000001821	lincRNA
LNC_001264	XLOC_075298	lincRNA
ENSSSCT00000032953	ENSSSCG00000030923	processed_transcript
LNC_001733	XLOC_102672	lincRNA
ALDBSSCT0000009973	ALDBSSCG0000006066	lincRNA
ALDBSSCT0000010088	ALDBSSCG0000006141	lincRNA
LNC_000320	XLOC_018910	lincRNA
LNC_000521	XLOC_031706	lincRNA
LNC_000520	XLOC_031659	lincRNA
ALDBSSCT0000010155	ALDBSSCG0000006182	lincRNA
LNC_001305	XLOC_078236	lincRNA
LNC_001106	XLOC_066715	lincRNA
ALDBSSCT0000004845	ALDBSSCG0000002941	lincRNA
LNC_000683	XLOC_040893	lincRNA
LNC_000883	XLOC_052356	antisense_lncRNA
ALDBSSCT0000000073	ALDBSSCG0000000042	lincRNA
ALDBSSCT0000010896	ALDBSSCG0000006603	lincRNA
ALDBSSCT0000006627	ALDBSSCG0000004053	lincRNA
ALDBSSCT0000007366	ALDBSSCG0000004471	lincRNA
LNC_000889	XLOC_052506	antisense_lncRNA
LNC_001414	XLOC_083689	lincRNA
ALDBSSCT0000008329	ALDBSSCG0000005055	lincRNA
LNC_000619	XLOC_037244	lincRNA
LNC_000884	XLOC_052486	lincRNA
ALDBSSCT0000004396	ALDBSSCG0000002673	lincRNA
LNC_001484	XLOC_087295	lincRNA
ALDBSSCT0000007070	ALDBSSCG0000004297	lincRNA
ALDBSSCT0000007063	ALDBSSCG0000004294	lincRNA
LNC_001959	XLOC_116846	lincRNA
ALDBSSCT0000005458	ALDBSSCG0000003307	lincRNA
ALDBSSCT0000002674	ALDBSSCG0000001623	lincRNA
LNC_001253	XLOC_074796	lincRNA
LNC_001254	XLOC_074841	lincRNA
ALDBSSCT0000003606	ALDBSSCG0000002158	lincRNA
ALDBSSCT0000002761	ALDBSSCG0000001674	lincRNA
ALDBSSCT0000000164	ALDBSSCG0000000099	lincRNA
LNC_001509	XLOC_088811	lincRNA
ALDBSSCT0000002768	ALDBSSCG0000001679	lincRNA
LNC_000354	XLOC_021804	lincRNA
LNC_001020	XLOC_061192	lincRNA
LNC_000020	XLOC_001057	lincRNA
LNC_000623	XLOC_037516	lincRNA
ALDBSSCT0000007276	ALDBSSCG0000004410	lincRNA
LNC_001176	XLOC_070809	lincRNA
LNC_000454	XLOC_028633	lincRNA
ALDBSSCT0000008223	ALDBSSCG0000004992	lincRNA
ALDBSSCT0000008637	ALDBSSCG0000005257	lincRNA
ALDBSSCT0000000040	ALDBSSCG0000000024	lincRNA
ALDBSSCT0000003968	ALDBSSCG0000002390	lincRNA
ALDBSSCT0000009323	ALDBSSCG0000005685	lincRNA
LNC_000003	XLOC_000251	antisense_lncRNA
ALDBSSCT0000009687	ALDBSSCG0000005912	lincRNA
ALDBSSCT0000010754	ALDBSSCG0000006508	lincRNA
LNC_001518	XLOC_089175	lincRNA
ALDBSSCT0000006722	ALDBSSCG0000004101	lincRNA
LNC_000902	XLOC_053104	lincRNA
ALDBSSCT0000003304	ALDBSSCG0000001986	lincRNA
LNC_001367	XLOC_081171	lincRNA
LNC_001517	XLOC_088894	lincRNA
LNC_001898	XLOC_113024	lincRNA
ALDBSSCT0000006106	ALDBSSCG0000003729	lincRNA
LNC_000176	XLOC_010294	lincRNA
ALDBSSCT0000010599	ALDBSSCG0000006427	lincRNA
LNC_000742	XLOC_043588	lincRNA
ALDBSSCT0000007931	ALDBSSCG0000004805	lincRNA
ALDBSSCT0000008939	ALDBSSCG0000005469	lincRNA
ALDBSSCT0000010059	ALDBSSCG0000006120	lincRNA
ALDBSSCT0000002792	ALDBSSCG0000001695	lincRNA
LNC_001127	XLOC_067756	lincRNA
LNC_000037	XLOC_001912	lincRNA
LNC_000628	XLOC_037978	antisense_lncRNA
ALDBSSCT0000003678	ALDBSSCG0000002200	lincRNA
LNC_001956	XLOC_116758	lincRNA
LNC_001324	XLOC_079284	lincRNA
LNC_001325	XLOC_079442	antisense_lncRNA
ALDBSSCT0000009916	ALDBSSCG0000006037	lincRNA
LNC_001240	XLOC_074396	lincRNA
LNC_000340	XLOC_021341	lincRNA
LNC_001595	XLOC_093069	lincRNA
LNC_001594	XLOC_093048	lincRNA
LNC_000464	XLOC_028838	lincRNA
LNC_001755	XLOC_103923	antisense_lncRNA
ALDBSSCT0000011757	ALDBSSCG0000007130	lincRNA
LNC_001058	XLOC_063425	lincRNA
LNC_002009	XLOC_120225	lincRNA
ALDBSSCT0000002482	ALDBSSCG0000001501	lincRNA
ENSSSCT00000034217	ENSSSCG00000008496	processed_transcript
ALDBSSCT0000007535	ALDBSSCG0000004572	lincRNA
ALDBSSCT0000001990	ALDBSSCG0000001201	lincRNA
LNC_001747	XLOC_103438	lincRNA
ALDBSSCT0000000051	ALDBSSCG0000000031	lincRNA
LNC_001617	XLOC_095373	lincRNA
ALDBSSCT0000009442	ALDBSSCG0000005758	lincRNA
ALDBSSCT0000000055	ALDBSSCG0000000035	lincRNA
ALDBSSCT0000008403	ALDBSSCG0000005104	lincRNA
ALDBSSCT0000000346	ALDBSSCG0000000207	lincRNA
ALDBSSCT0000005722	ALDBSSCG0000003473	lincRNA
LNC_001759	XLOC_104003	lincRNA
ALDBSSCT0000006918	ALDBSSCG0000004208	lincRNA
ALDBSSCT0000002388	ALDBSSCG0000001447	lincRNA
ALDBSSCT0000011995	ALDBSSCG0000007304	lincRNA
LNC_000922	XLOC_054322	lincRNA
LNC_001965	XLOC_117081	lincRNA
ALDBSSCT0000010764	ALDBSSCG0000006516	lincRNA
ALDBSSCT0000005534	ALDBSSCG0000003352	lincRNA
LNC_000372	XLOC_022917	lincRNA
LNC_000492	XLOC_030587	lincRNA
LNC_000042	XLOC_002451	lincRNA
ALDBSSCT0000001698	ALDBSSCG0000001024	lincRNA
LNC_001985	XLOC_118644	lincRNA
LNC_001232	XLOC_073939	lincRNA
ALDBSSCT0000007158	ALDBSSCG0000004353	lincRNA
LNC_000780	XLOC_046229	lincRNA
ALDBSSCT0000004441	ALDBSSCG0000002705	lincRNA
ALDBSSCT0000004443	ALDBSSCG0000002707	lincRNA
LNC_001238	XLOC_074251	lincRNA
ALDBSSCT0000006016	ALDBSSCG0000003679	lincRNA
ALDBSSCT0000011058	ALDBSSCG0000006713	lincRNA
ALDBSSCT0000007398	ALDBSSCG0000004485	lincRNA
ALDBSSCT0000007018	ALDBSSCG0000004267	lincRNA
ALDBSSCT0000002430	ALDBSSCG0000001471	lincRNA
ENSSSCT00000032859	ENSSSCG00000030767	processed_transcript
ALDBSSCT0000004038	ALDBSSCG0000002436	lincRNA
ALDBSSCT0000011585	ALDBSSCG0000007034	lincRNA
ALDBSSCT0000010693	ALDBSSCG0000006476	lincRNA
ALDBSSCT0000003048	ALDBSSCG0000001826	lincRNA
ALDBSSCT0000007509	ALDBSSCG0000004555	lincRNA
ALDBSSCT0000008555	ALDBSSCG0000005204	lincRNA

## Sheet: DGEs(mRNA) 
Transcript_id	Gene_id	Gene_type	Official_Symbol
ENSSSCT00000014563	ENSSSCG00000013335	protein_coding	LGR4
ENSSSCT00000014569	ENSSSCG00000013341	protein_coding	LUZP2
ENSSSCT00000031806	ENSSSCG00000021560	protein_coding	UBE2I
ENSSSCT00000031800	ENSSSCG00000027282	protein_coding	--
ENSSSCT00000004260	ENSSSCG00000003848	protein_coding	LRP8
ENSSSCT00000026242	ENSSSCG00000025887	protein_coding	--
ENSSSCT00000032055	ENSSSCG00000027603	protein_coding	--
ENSSSCT00000028859	ENSSSCG00000028674	protein_coding	CR2
ENSSSCT00000006880	ENSSSCG00000006280	protein_coding	--
ENSSSCT00000013222	ENSSSCG00000012088	protein_coding	--
ENSSSCT00000002946	ENSSSCG00000002655	protein_coding	MAP1LC3B
ENSSSCT00000001548	ENSSSCG00000001412	protein_coding	C6orf47
ENSSSCT00000002942	ENSSSCG00000002651	protein_coding	CDT1
ENSSSCT00000016949	ENSSSCG00000015559	protein_coding	NCF2
ENSSSCT00000033880	ENSSSCG00000012247	protein_coding	ATP6AP2
ENSSSCT00000003949	ENSSSCG00000003555	protein_coding	--
ENSSSCT00000026880	ENSSSCG00000028736	protein_coding	--
ENSSSCT00000031972	ENSSSCG00000029990	protein_coding	DEFB1
ENSSSCT00000016943	ENSSSCG00000015553	protein_coding	--
ENSSSCT00000001768	ENSSSCG00000001588	protein_coding	DNAH8
ENSSSCT00000026067	ENSSSCG00000022661	protein_coding	FCHO2
ENSSSCT00000007257	ENSSSCG00000006623	protein_coding	PSMB4
ENSSSCT00000001764	ENSSSCG00000001584	protein_coding	--
ENSSSCT00000023769	ENSSSCG00000021766	protein_coding	--
ENSSSCT00000018040	ENSSSCG00000016570	protein_coding	TSPAN33
ENSSSCT00000015787	ENSSSCG00000014441	protein_coding	--
ENSSSCT00000002707	ENSSSCG00000002437	protein_coding	RPS6KA5
ENSSSCT00000013746	ENSSSCG00000012571	protein_coding	COL4A6
ENSSSCT00000003982	ENSSSCG00000003587	protein_coding	TMEM200B
ENSSSCT00000027444	ENSSSCG00000027946	protein_coding	MVP
ENSSSCT00000006492	ENSSSCG00000005912	protein_coding	--
ENSSSCT00000023341	ENSSSCG00000024869	protein_coding	--
ENSSSCT00000001612	ENSSSCG00000001455	protein_coding	SLA-DRB1
ENSSSCT00000001617	ENSSSCG00000001457	protein_coding	SLA-DQB1
ENSSSCT00000001619	ENSSSCG00000001459	protein_coding	--
ENSSSCT00000023293	ENSSSCG00000021769	protein_coding	--
ENSSSCT00000000807	ENSSSCG00000000743	protein_coding	FKBP4
ENSSSCT00000014100	ENSSSCG00000012897	protein_coding	--
ENSSSCT00000005049	ENSSSCG00000004570	protein_coding	TPM1
ENSSSCT00000002015	ENSSSCG00000001799	protein_coding	--
ENSSSCT00000009971	ENSSSCG00000009104	protein_coding	MAD2L1
ENSSSCT00000005485	ENSSSCG00000004973	protein_coding	UACA
ENSSSCT00000009978	ENSSSCG00000009111	protein_coding	SYNPO2
ENSSSCT00000031373	ENSSSCG00000025208	protein_coding	RNF39
ENSSSCT00000007382	ENSSSCG00000026907	protein_coding	--
ENSSSCT00000007037	ENSSSCG00000006423	protein_coding	OR6N2
ENSSSCT00000000709	ENSSSCG00000000653	protein_coding	CD69
ENSSSCT00000007031	ENSSSCG00000006418	protein_coding	--
ENSSSCT00000024938	ENSSSCG00000023434	protein_coding	--
ENSSSCT00000032848	ENSSSCG00000017983	protein_coding	PER1
ENSSSCT00000029518	ENSSSCG00000028040	protein_coding	C19orf24
ENSSSCT00000003722	ENSSSCG00000003353	protein_coding	--
ENSSSCT00000029511	ENSSSCG00000022849	protein_coding	IL2RA
ENSSSCT00000029514	ENSSSCG00000021355	protein_coding	SOD1
ENSSSCT00000029515	ENSSSCG00000030713	protein_coding	--
ENSSSCT00000006661	ENSSSCG00000006070	protein_coding	COX6C
ENSSSCT00000006662	ENSSSCG00000006071	protein_coding	--
ENSSSCT00000000418	ENSSSCG00000025467	protein_coding	-
ENSSSCT00000003059	ENSSSCG00000002762	protein_coding	TERF2
ENSSSCT00000024021	ENSSSCG00000030483	protein_coding	--
ENSSSCT00000024020	ENSSSCG00000023758	protein_coding	--
ENSSSCT00000019117	ENSSSCG00000017562	protein_coding	CACNA1G
ENSSSCT00000019113	ENSSSCG00000017558	protein_coding	TOB1
ENSSSCT00000003052	ENSSSCG00000002755	protein_coding	NFAT5
ENSSSCT00000018937	ENSSSCG00000017397	protein_coding	MLX
ENSSSCT00000028446	ENSSSCG00000026414	protein_coding	ATOX1
ENSSSCT00000028449	ENSSSCG00000022404	protein_coding	--
ENSSSCT00000016793	ENSSSCG00000020857	protein_coding	--
ENSSSCT00000023834	ENSSSCG00000028320	protein_coding	--
ENSSSCT00000012495	ENSSSCG00000011415	protein_coding	MAPKAPK3
ENSSSCT00000025993	ENSSSCG00000024335	protein_coding	OR10J5
ENSSSCT00000007727	ENSSSCG00000007056	protein_coding	PLCB1
ENSSSCT00000031162	ENSSSCG00000024095	protein_coding	--
ENSSSCT00000025190	ENSSSCG00000021977	protein_coding	GPD1L
ENSSSCT00000008896	ENSSSCG00000008120	protein_coding	--
ENSSSCT00000007620	ENSSSCG00000006955	protein_coding	GSDMD
ENSSSCT00000016320	ENSSSCG00000014959	protein_coding	PIWIL4
ENSSSCT00000008546	ENSSSCG00000007798	protein_coding	TBC1D10B
ENSSSCT00000008899	ENSSSCG00000008123	protein_coding	ARID5A
ENSSSCT00000029241	ENSSSCG00000027764	protein_coding	--
ENSSSCT00000011788	ENSSSCG00000010774	protein_coding	--
ENSSSCT00000029243	ENSSSCG00000029040	protein_coding	--
ENSSSCT00000012478	ENSSSCG00000011400	protein_coding	SEMA3B
ENSSSCT00000035863	ENSSSCG00000012262	protein_coding	KDM6A
ENSSSCT00000006871	ENSSSCG00000024404	protein_coding	--
ENSSSCT00000008944	ENSSSCG00000008167	protein_coding	CNOT11
ENSSSCT00000008945	ENSSSCG00000008168	protein_coding	RNF149
ENSSSCT00000029886	ENSSSCG00000022902	protein_coding	--
ENSSSCT00000019689	ENSSSCG00000018094	protein_coding	CYTB
ENSSSCT00000019686	ENSSSCG00000018091	protein_coding	ND5
ENSSSCT00000017556	ENSSSCG00000016125	protein_coding	INO80D
ENSSSCT00000019682	ENSSSCG00000018087	protein_coding	ND4
ENSSSCT00000008948	ENSSSCG00000008171	protein_coding	NPAS2
ENSSSCT00000028853	ENSSSCG00000022438	protein_coding	--
ENSSSCT00000012782	ENSSSCG00000011676	protein_coding	--
ENSSSCT00000011072	ENSSSCG00000010111	protein_coding	DGCR2
ENSSSCT00000030762	ENSSSCG00000022798	protein_coding	LRRC8B
ENSSSCT00000019660	ENSSSCG00000018065	protein_coding	ND1
ENSSSCT00000025376	ENSSSCG00000023178	protein_coding	BATF2
ENSSSCT00000019664	ENSSSCG00000018069	protein_coding	ND2
ENSSSCT00000008769	ENSSSCG00000008001	protein_coding	MSLN
ENSSSCT00000018246	ENSSSCG00000016762	protein_coding	--
ENSSSCT00000018240	ENSSSCG00000016758	protein_coding	--
ENSSSCT00000022571	ENSSSCG00000030458	protein_coding	--
ENSSSCT00000014091	ENSSSCG00000012889	protein_coding	CHKA
ENSSSCT00000014092	ENSSSCG00000012890	protein_coding	TCIRG1
ENSSSCT00000035918	ENSSSCG00000006979	protein_coding	MSR1
ENSSSCT00000032333	ENSSSCG00000026251	protein_coding	--
ENSSSCT00000014099	ENSSSCG00000012896	protein_coding	NDUFV1
ENSSSCT00000014098	ENSSSCG00000012895	protein_coding	--
ENSSSCT00000031744	ENSSSCG00000029872	protein_coding	--
ENSSSCT00000018649	ENSSSCG00000017131	protein_coding	FN3K
ENSSSCT00000028933	ENSSSCG00000027486	protein_coding	TRIP6
ENSSSCT00000016378	ENSSSCG00000015014	protein_coding	ZC3H12C
ENSSSCT00000022977	ENSSSCG00000022590	protein_coding	GPRC5C
ENSSSCT00000016377	ENSSSCG00000015013	protein_coding	RDX
ENSSSCT00000031749	ENSSSCG00000029451	protein_coding	--
ENSSSCT00000011410	ENSSSCG00000010426	protein_coding	PCDH15
ENSSSCT00000030692	ENSSSCG00000029662	protein_coding	--
ENSSSCT00000007823	ENSSSCG00000007150	protein_coding	--
ENSSSCT00000015300	ENSSSCG00000014007	protein_coding	FLT4
ENSSSCT00000024752	ENSSSCG00000027672	protein_coding	SUOX
ENSSSCT00000008160	ENSSSCG00000007456	protein_coding	--
ENSSSCT00000005913	ENSSSCG00000005373	protein_coding	NANS
ENSSSCT00000005911	ENSSSCG00000005371	protein_coding	HEMGN
ENSSSCT00000005916	ENSSSCG00000005376	protein_coding	TBC1D2
ENSSSCT00000008167	ENSSSCG00000007463	protein_coding	PTGIS
ENSSSCT00000008169	ENSSSCG00000007465	protein_coding	B4GALT5
ENSSSCT00000030874	ENSSSCG00000023733	protein_coding	--
ENSSSCT00000018421	ENSSSCG00000016915	protein_coding	IL31RA
ENSSSCT00000022755	ENSSSCG00000029228	protein_coding	ZNF276
ENSSSCT00000012929	ENSSSCG00000011817	protein_coding	CCDC50
ENSSSCT00000010237	ENSSSCG00000009341	protein_coding	--
ENSSSCT00000012922	ENSSSCG00000011810	protein_coding	--
ENSSSCT00000010233	ENSSSCG00000009337	protein_coding	--
ENSSSCT00000011522	ENSSSCG00000010532	protein_coding	LOXL4
ENSSSCT00000016203	ENSSSCG00000014851	protein_coding	SLCO2B1
ENSSSCT00000006932	ENSSSCG00000006324	protein_coding	ALDH9A1
ENSSSCT00000011528	ENSSSCG00000010538	protein_coding	NKX2-3
ENSSSCT00000030347	ENSSSCG00000027165	protein_coding	UBE2G2
ENSSSCT00000015417	ENSSSCG00000014114	protein_coding	PAPD4
ENSSSCT00000008365	ENSSSCG00000007625	protein_coding	ARPC1B
ENSSSCT00000000399	ENSSSCG00000000374	protein_coding	RPS26
ENSSSCT00000032113	ENSSSCG00000030239	protein_coding	--
ENSSSCT00000018330	ENSSSCG00000016835	protein_coding	SKP2
ENSSSCT00000005709	ENSSSCG00000005178	protein_coding	CNTLN
ENSSSCT00000015776	ENSSSCG00000014431	protein_coding	AFAP1L1
ENSSSCT00000018339	ENSSSCG00000016842	protein_coding	NIPBL
ENSSSCT00000004658	ENSSSCG00000004215	protein_coding	KIAA0408
ENSSSCT00000012812	ENSSSCG00000011702	protein_coding	TM4SF1
ENSSSCT00000008386	ENSSSCG00000007646	protein_coding	LAMTOR4
ENSSSCT00000035484	ENSSSCG00000014442	protein_coding	PDGFRB
ENSSSCT00000000089	ENSSSCG00000000083	protein_coding	RPS19BP1
ENSSSCT00000000086	ENSSSCG00000000080	protein_coding	GRAP2
ENSSSCT00000007909	ENSSSCG00000007229	protein_coding	BCL2L1
ENSSSCT00000004093	ENSSSCG00000003694	protein_coding	EMILIN2
ENSSSCT00000013781	ENSSSCG00000012602	protein_coding	C1GALT1C1
ENSSSCT00000002833	ENSSSCG00000002550	protein_coding	C14orf2
ENSSSCT00000004099	ENSSSCG00000003700	protein_coding	ESCO1
ENSSSCT00000022357	ENSSSCG00000026872	protein_coding	TNFSF13
ENSSSCT00000010243	ENSSSCG00000009346	protein_coding	--
ENSSSCT00000002957	ENSSSCG00000002666	protein_coding	KIAA0513
ENSSSCT00000033520	ENSSSCG00000010404	protein_coding	ALOX5
ENSSSCT00000017959	ENSSSCG00000016495	protein_coding	NDUFB2
ENSSSCT00000017958	ENSSSCG00000016494	protein_coding	BRAF
ENSSSCT00000017229	ENSSSCG00000015821	protein_coding	ADRB3
ENSSSCT00000006061	ENSSSCG00000005511	protein_coding	--
ENSSSCT00000009700	ENSSSCG00000008860	protein_coding	--
ENSSSCT00000009387	ENSSSCG00000008578	protein_coding	ADCY3
ENSSSCT00000026277	ENSSSCG00000029027	protein_coding	--
ENSSSCT00000000880	ENSSSCG00000000811	protein_coding	--
ENSSSCT00000012576	ENSSSCG00000011493	protein_coding	ATXN7
ENSSSCT00000001570	ENSSSCG00000001427	protein_coding	C4A
ENSSSCT00000000889	ENSSSCG00000000816	protein_coding	SENP1
ENSSSCT00000013253	ENSSSCG00000012116	protein_coding	PRPS2
ENSSSCT00000009361	ENSSSCG00000008556	protein_coding	KHK
ENSSSCT00000009362	ENSSSCG00000008557	protein_coding	EMILIN1
ENSSSCT00000024075	ENSSSCG00000027918	protein_coding	STAT1
ENSSSCT00000031907	ENSSSCG00000029465	protein_coding	--
ENSSSCT00000028903	ENSSSCG00000024583	protein_coding	--
ENSSSCT00000026051	ENSSSCG00000025145	protein_coding	--
ENSSSCT00000023024	ENSSSCG00000021399	protein_coding	HIST2H2AA3
ENSSSCT00000001040	ENSSSCG00000000951	protein_coding	CSRP2
ENSSSCT00000000970	ENSSSCG00000000886	protein_coding	SLC25A3
ENSSSCT00000004475	ENSSSCG00000004047	protein_coding	MRPL18
ENSSSCT00000004470	ENSSSCG00000004042	protein_coding	--
ENSSSCT00000002714	ENSSSCG00000002444	protein_coding	FBLN5
ENSSSCT00000017319	ENSSSCG00000015906	protein_coding	CSRNP3
ENSSSCT00000026185	ENSSSCG00000024750	protein_coding	GFOD2
ENSSSCT00000026182	ENSSSCG00000029352	protein_coding	CCNL1
ENSSSCT00000017315	ENSSSCG00000015902	protein_coding	--
ENSSSCT00000017314	ENSSSCG00000015901	protein_coding	GRB14
ENSSSCT00000017034	ENSSSCG00000015638	protein_coding	C1orf186
ENSSSCT00000017033	ENSSSCG00000015637	protein_coding	SEC61G
ENSSSCT00000005840	ENSSSCG00000005302	protein_coding	STOML2
ENSSSCT00000023333	ENSSSCG00000029866	protein_coding	CCDC112
ENSSSCT00000023623	ENSSSCG00000024827	protein_coding	ABTB1
ENSSSCT00000001623	ENSSSCG00000028872	protein_coding	PSMB8
ENSSSCT00000030983	ENSSSCG00000021591	protein_coding	--
ENSSSCT00000000620	ENSSSCG00000000576	protein_coding	--
ENSSSCT00000026692	ENSSSCG00000025922	protein_coding	--
ENSSSCT00000002000	ENSSSCG00000001785	protein_coding	MESDC1
ENSSSCT00000004509	ENSSSCG00000004080	protein_coding	MYCT1
ENSSSCT00000005057	ENSSSCG00000004578	protein_coding	ANXA2
ENSSSCT00000005056	ENSSSCG00000004577	protein_coding	ICE2
ENSSSCT00000005298	ENSSSCG00000004799	protein_coding	ZNF770
ENSSSCT00000016572	ENSSSCG00000015206	protein_coding	CCDC15
ENSSSCT00000009963	ENSSSCG00000009097	protein_coding	ANXA5
ENSSSCT00000009962	ENSSSCG00000009096	protein_coding	EXOSC9
ENSSSCT00000013027	ENSSSCG00000011904	protein_coding	UPK1B
ENSSSCT00000012939	ENSSSCG00000011827	protein_coding	LSG1
ENSSSCT00000029878	ENSSSCG00000029981	protein_coding	--
ENSSSCT00000029876	ENSSSCG00000021632	protein_coding	--
ENSSSCT00000031005	ENSSSCG00000025211	protein_coding	--
ENSSSCT00000002224	ENSSSCG00000001988	protein_coding	ADCY4
ENSSSCT00000027125	ENSSSCG00000026043	protein_coding	--
ENSSSCT00000003995	ENSSSCG00000003600	protein_coding	TINAGL1
ENSSSCT00000003448	ENSSSCG00000003109	protein_coding	TMEM160
ENSSSCT00000024905	ENSSSCG00000027056	protein_coding	--
ENSSSCT00000032581	ENSSSCG00000030642	protein_coding	PCNA
ENSSSCT00000024901	ENSSSCG00000022789	protein_coding	--
ENSSSCT00000003444	ENSSSCG00000003105	protein_coding	SLC1A5
ENSSSCT00000028050	ENSSSCG00000024783	protein_coding	--
ENSSSCT00000029507	ENSSSCG00000024697	protein_coding	TMEM125
ENSSSCT00000007289	ENSSSCG00000006652	protein_coding	MCL1
ENSSSCT00000030503	ENSSSCG00000028696	protein_coding	FEN1
ENSSSCT00000028059	ENSSSCG00000024350	protein_coding	--
ENSSSCT00000024340	ENSSSCG00000029270	protein_coding	SMIM19
ENSSSCT00000024347	ENSSSCG00000022506	protein_coding	--
ENSSSCT00000006656	ENSSSCG00000006066	protein_coding	RNF19A
ENSSSCT00000019475	ENSSSCG00000017896	protein_coding	SCIMP
ENSSSCT00000004056	ENSSSCG00000003660	protein_coding	PABPC4
ENSSSCT00000019472	ENSSSCG00000017894	protein_coding	WSCD1
ENSSSCT00000028476	ENSSSCG00000026721	protein_coding	RNASE4
ENSSSCT00000018922	ENSSSCG00000017383	protein_coding	AOC3
ENSSSCT00000003198	ENSSSCG00000002893	protein_coding	--
ENSSSCT00000012265	ENSSSCG00000011199	protein_coding	TBC1D5
ENSSSCT00000012267	ENSSSCG00000011201	protein_coding	SATB1
ENSSSCT00000016785	ENSSSCG00000015410	protein_coding	PHTF2
ENSSSCT00000023223	ENSSSCG00000025981	protein_coding	SLC38A5
ENSSSCT00000030436	ENSSSCG00000021599	protein_coding	--
ENSSSCT00000029478	ENSSSCG00000030610	protein_coding	--
ENSSSCT00000025982	ENSSSCG00000026542	protein_coding	FIGN
ENSSSCT00000016789	ENSSSCG00000015414	protein_coding	FAM185A
ENSSSCT00000004871	ENSSSCG00000004408	protein_coding	SMPD2
ENSSSCT00000025183	ENSSSCG00000030012	protein_coding	OLFML1
ENSSSCT00000002087	ENSSSCG00000001862	protein_coding	ETFA
ENSSSCT00000025181	ENSSSCG00000025463	protein_coding	--
ENSSSCT00000004875	ENSSSCG00000004412	protein_coding	MICAL1
ENSSSCT00000011650	ENSSSCG00000010651	protein_coding	ABLIM1
ENSSSCT00000024164	ENSSSCG00000022537	protein_coding	--
ENSSSCT00000008555	ENSSSCG00000007807	protein_coding	CD19
ENSSSCT00000024163	ENSSSCG00000021010	protein_coding	TMEM219
ENSSSCT00000012444	ENSSSCG00000011366	protein_coding	SLC25A20
ENSSSCT00000025744	ENSSSCG00000014291	protein_coding	AFF4
ENSSSCT00000025741	ENSSSCG00000027742	protein_coding	--
ENSSSCT00000019273	ENSSSCG00000017707	protein_coding	TAF15
ENSSSCT00000029252	ENSSSCG00000025254	protein_coding	ZNF624
ENSSSCT00000008395	ENSSSCG00000007655	protein_coding	--
ENSSSCT00000028309	ENSSSCG00000025117	protein_coding	ATN1
ENSSSCT00000019278	ENSSSCG00000017712	protein_coding	--
ENSSSCT00000008956	ENSSSCG00000008178	protein_coding	AFF3
ENSSSCT00000029896	ENSSSCG00000027689	protein_coding	SRM
ENSSSCT00000011069	ENSSSCG00000010108	protein_coding	--
ENSSSCT00000005636	ENSSSCG00000005113	protein_coding	--
ENSSSCT00000006725	ENSSSCG00000006132	protein_coding	MMP16
ENSSSCT00000030750	ENSSSCG00000020870	protein_coding	DBF4
ENSSSCT00000014222	ENSSSCG00000013011	protein_coding	SAC3D1
ENSSSCT00000008776	ENSSSCG00000008008	protein_coding	STUB1
ENSSSCT00000018781	ENSSSCG00000017252	protein_coding	KCNJ2
ENSSSCT00000018780	ENSSSCG00000017251	protein_coding	SOX9
ENSSSCT00000008772	ENSSSCG00000008004	protein_coding	FAM173A
ENSSSCT00000022506	ENSSSCG00000029082	protein_coding	KMT2E
ENSSSCT00000019098	ENSSSCG00000017544	protein_coding	ATP5G1
ENSSSCT00000035852	ENSSSCG00000026569	protein_coding	--
ENSSSCT00000012689	ENSSSCG00000011593	protein_coding	--
ENSSSCT00000018656	ENSSSCG00000017137	protein_coding	METRNL
ENSSSCT00000018654	ENSSSCG00000017136	protein_coding	TBCD
ENSSSCT00000018652	ENSSSCG00000017134	protein_coding	FN3KRP
ENSSSCT00000004271	ENSSSCG00000003859	protein_coding	ZCCHC11
ENSSSCT00000024565	ENSSSCG00000015882	protein_coding	BAZ2B
ENSSSCT00000031591	ENSSSCG00000020686	protein_coding	SDHA
ENSSSCT00000010422	ENSSSCG00000009505	protein_coding	MBNL2
ENSSSCT00000015311	ENSSSCG00000014016	protein_coding	SQSTM1
ENSSSCT00000015312	ENSSSCG00000014017	protein_coding	MGAT4B
ENSSSCT00000005901	ENSSSCG00000005361	protein_coding	ALDH1B1
ENSSSCT00000005454	ENSSSCG00000004942	protein_coding	TIPIN
ENSSSCT00000032215	ENSSSCG00000029325	protein_coding	--
ENSSSCT00000016211	ENSSSCG00000014859	protein_coding	--
ENSSSCT00000011243	ENSSSCG00000010272	protein_coding	ADAMTS14
ENSSSCT00000011536	ENSSSCG00000010545	protein_coding	CPN1
ENSSSCT00000006908	ENSSSCG00000006303	protein_coding	--
ENSSSCT00000022699	ENSSSCG00000022281	protein_coding	--
ENSSSCT00000014139	ENSSSCG00000012934	protein_coding	--
ENSSSCT00000010683	ENSSSCG00000009744	protein_coding	SFSWAP
ENSSSCT00000032106	ENSSSCG00000028663	protein_coding	RBM25
ENSSSCT00000004643	ENSSSCG00000004202	protein_coding	SAMD3
ENSSSCT00000035671	ENSSSCG00000024310	protein_coding	F13A1
ENSSSCT00000009171	ENSSSCG00000008376	protein_coding	COMMD1
ENSSSCT00000030248	ENSSSCG00000028552	protein_coding	BHLHE41
ENSSSCT00000013036	ENSSSCG00000011913	protein_coding	--
ENSSSCT00000014042	ENSSSCG00000012847	protein_coding	TALDO1
ENSSSCT00000004085	ENSSSCG00000003687	protein_coding	EPB41L3
ENSSSCT00000014041	ENSSSCG00000012846	protein_coding	PDDC1
ENSSSCT00000004080	ENSSSCG00000003682	protein_coding	ANKRD12
ENSSSCT00000015547	ENSSSCG00000014229	protein_coding	--
ENSSSCT00000013796	ENSSSCG00000012617	protein_coding	UPF3B
ENSSSCT00000028871	ENSSSCG00000030478	protein_coding	MRPL42
ENSSSCT00000005604	ENSSSCG00000005084	protein_coding	PPM1A
ENSSSCT00000028877	ENSSSCG00000022516	protein_coding	--
ENSSSCT00000016727	ENSSSCG00000015353	protein_coding	SCIN
ENSSSCT00000014540	ENSSSCG00000013314	protein_coding	QSER1
ENSSSCT00000006018	ENSSSCG00000005472	protein_coding	SLC46A2
ENSSSCT00000000180	ENSSSCG00000000171	protein_coding	CKAP4
ENSSSCT00000000184	ENSSSCG00000000175	protein_coding	--
ENSSSCT00000000188	ENSSSCG00000000179	protein_coding	CCDC65
ENSSSCT00000000189	ENSSSCG00000000180	protein_coding	FKBP11
ENSSSCT00000001367	ENSSSCG00000001252	protein_coding	UBD
ENSSSCT00000032078	ENSSSCG00000022145	protein_coding	RPF1
ENSSSCT00000011133	ENSSSCG00000010167	protein_coding	MAP10
ENSSSCT00000001568	ENSSSCG00000001426	protein_coding	STK19
ENSSSCT00000001564	ENSSSCG00000024914	protein_coding	CFB
ENSSSCT00000029631	ENSSSCG00000023278	protein_coding	--
ENSSSCT00000012752	ENSSSCG00000011650	protein_coding	MSL2
ENSSSCT00000026048	ENSSSCG00000025130	protein_coding	--
ENSSSCT00000016960	ENSSSCG00000015569	protein_coding	SWT1
ENSSSCT00000023746	ENSSSCG00000023298	protein_coding	--
ENSSSCT00000009590	ENSSSCG00000008765	protein_coding	PCDH7
ENSSSCT00000009596	ENSSSCG00000008771	protein_coding	C4orf19
ENSSSCT00000026044	ENSSSCG00000022357	protein_coding	--
ENSSSCT00000026465	ENSSSCG00000025795	protein_coding	CSF3R
ENSSSCT00000026460	ENSSSCG00000023171	protein_coding	--
ENSSSCT00000000980	ENSSSCG00000000896	protein_coding	NTN4
ENSSSCT00000017505	ENSSSCG00000016077	protein_coding	HSPD1
ENSSSCT00000001103	ENSSSCG00000001011	protein_coding	SERPINB1
ENSSSCT00000035454	ENSSSCG00000013297	protein_coding	CD44
ENSSSCT00000035457	ENSSSCG00000028027	protein_coding	GPR65
ENSSSCT00000034984	ENSSSCG00000017702	protein_coding	CCL23
ENSSSCT00000031355	ENSSSCG00000022313	protein_coding	--
ENSSSCT00000025651	ENSSSCG00000020769	protein_coding	--
ENSSSCT00000001638	ENSSSCG00000001472	protein_coding	SLA-DOA
ENSSSCT00000001634	ENSSSCG00000001470	protein_coding	HLA-DMA
ENSSSCT00000005026	ENSSSCG00000004550	protein_coding	OAZ2
ENSSSCT00000005024	ENSSSCG00000004549	protein_coding	RBPMS2
ENSSSCT00000005124	ENSSSCG00000004639	protein_coding	USP8
ENSSSCT00000016569	ENSSSCG00000015203	protein_coding	ROBO4
ENSSSCT00000013018	ENSSSCG00000011896	protein_coding	ADPRH
ENSSSCT00000013019	ENSSSCG00000011897	protein_coding	--
ENSSSCT00000024827	ENSSSCG00000023861	protein_coding	PFAS
ENSSSCT00000026997	ENSSSCG00000025307	protein_coding	-
ENSSSCT00000006235	ENSSSCG00000005672	protein_coding	PTPA
ENSSSCT00000016567	ENSSSCG00000015201	protein_coding	MSANTD2
ENSSSCT00000016566	ENSSSCG00000015200	protein_coding	--
ENSSSCT00000002583	ENSSSCG00000002321	protein_coding	--
ENSSSCT00000023251	ENSSSCG00000022086	protein_coding	RBMX2
ENSSSCT00000030536	ENSSSCG00000024393	protein_coding	B3GNT5
ENSSSCT00000017797	ENSSSCG00000016342	protein_coding	HES6
ENSSSCT00000009088	ENSSSCG00000008298	protein_coding	--
ENSSSCT00000017795	ENSSSCG00000016340	protein_coding	ASB1
ENSSSCT00000027931	ENSSSCG00000024316	protein_coding	COX5A
ENSSSCT00000023928	ENSSSCG00000027225	protein_coding	--
ENSSSCT00000016291	ENSSSCG00000014934	protein_coding	CHORDC1
ENSSSCT00000027155	ENSSSCG00000029279	protein_coding	GNA11
ENSSSCT00000002101	ENSSSCG00000001876	protein_coding	IMP3
ENSSSCT00000003988	ENSSSCG00000003593	protein_coding	NKAIN1
ENSSSCT00000028682	ENSSSCG00000024974	protein_coding	RPL13
ENSSSCT00000028680	ENSSSCG00000023258	protein_coding	CLEC4F
ENSSSCT00000003983	ENSSSCG00000003588	protein_coding	SRSF4
ENSSSCT00000002109	ENSSSCG00000001884	protein_coding	COMMD4
ENSSSCT00000009821	ENSSSCG00000008966	protein_coding	PARM1
ENSSSCT00000024917	ENSSSCG00000024621	protein_coding	KAT2B
ENSSSCT00000028040	ENSSSCG00000024894	protein_coding	--
ENSSSCT00000007292	ENSSSCG00000006655	protein_coding	CIART
ENSSSCT00000024919	ENSSSCG00000020930	protein_coding	--
ENSSSCT00000029794	ENSSSCG00000030648	protein_coding	--
ENSSSCT00000017484	ENSSSCG00000016059	protein_coding	STAT4
ENSSSCT00000016170	ENSSSCG00000014819	protein_coding	ATG16L2
ENSSSCT00000016172	ENSSSCG00000014820	protein_coding	FCHSD2
ENSSSCT00000016175	ENSSSCG00000014823	protein_coding	P2RY6
ENSSSCT00000016177	ENSSSCG00000014825	protein_coding	RELT
ENSSSCT00000001963	ENSSSCG00000001757	protein_coding	WDR61
ENSSSCT00000028269	ENSSSCG00000020716	protein_coding	UNC119B
ENSSSCT00000003278	ENSSSCG00000002955	protein_coding	CATSPERG
ENSSSCT00000015143	ENSSSCG00000013863	protein_coding	SMIM7
ENSSSCT00000028261	ENSSSCG00000024311	protein_coding	CCR2
ENSSSCT00000028460	ENSSSCG00000030504	protein_coding	--
ENSSSCT00000004883	ENSSSCG00000004420	protein_coding	TRAF3IP2
ENSSSCT00000029404	ENSSSCG00000025105	protein_coding	--
ENSSSCT00000012277	ENSSSCG00000011211	protein_coding	THRB
ENSSSCT00000007748	ENSSSCG00000007077	protein_coding	ESF1
ENSSSCT00000012274	ENSSSCG00000011208	protein_coding	ZNF385D
ENSSSCT00000023410	ENSSSCG00000029999	protein_coding	--
ENSSSCT00000016777	ENSSSCG00000015402	protein_coding	CACNA2D1
ENSSSCT00000023814	ENSSSCG00000023690	protein_coding	PTMA
ENSSSCT00000006730	ENSSSCG00000006137	protein_coding	WWP1
ENSSSCT00000006737	ENSSSCG00000006144	protein_coding	C8orf59
ENSSSCT00000004868	ENSSSCG00000004405	protein_coding	--
ENSSSCT00000018940	ENSSSCG00000017400	protein_coding	NAGLU
ENSSSCT00000007604	ENSSSCG00000006940	protein_coding	CYR61
ENSSSCT00000014304	ENSSSCG00000013086	protein_coding	CYB561A3
ENSSSCT00000028312	ENSSSCG00000002032	protein_coding	SLC7A8
ENSSSCT00000019263	ENSSSCG00000025775	protein_coding	TADA2A
ENSSSCT00000019463	ENSSSCG00000017886	protein_coding	FBXO39
ENSSSCT00000019467	ENSSSCG00000017890	protein_coding	KIAA0753
ENSSSCT00000016688	ENSSSCG00000015315	protein_coding	RBM48
ENSSSCT00000016687	ENSSSCG00000015314	protein_coding	ANKIB1
ENSSSCT00000029311	ENSSSCG00000022820	protein_coding	VAMP8
ENSSSCT00000016682	ENSSSCG00000015309	protein_coding	MTERF1
ENSSSCT00000016683	ENSSSCG00000015310	protein_coding	AKAP9
ENSSSCT00000008966	ENSSSCG00000008187	protein_coding	--
ENSSSCT00000025886	ENSSSCG00000023762	protein_coding	TRPM2
ENSSSCT00000012055	ENSSSCG00000011013	protein_coding	WAC
ENSSSCT00000017573	ENSSSCG00000016140	protein_coding	FZD5
ENSSSCT00000031617	ENSSSCG00000029773	protein_coding	HIST1H4L
ENSSSCT00000008986	ENSSSCG00000008205	protein_coding	--
ENSSSCT00000024771	ENSSSCG00000020886	protein_coding	--
ENSSSCT00000008988	ENSSSCG00000008207	protein_coding	RPIA
ENSSSCT00000014232	ENSSSCG00000013021	protein_coding	SF1
ENSSSCT00000014235	ENSSSCG00000022815	protein_coding	PYGB
ENSSSCT00000014237	ENSSSCG00000013024	protein_coding	NRXN2
ENSSSCT00000024778	ENSSSCG00000021810	protein_coding	--
ENSSSCT00000022515	ENSSSCG00000022828	protein_coding	PNN
ENSSSCT00000008741	ENSSSCG00000007978	protein_coding	--
ENSSSCT00000029137	ENSSSCG00000027466	protein_coding	PCOLCE
ENSSSCT00000018220	ENSSSCG00000016738	protein_coding	H2AFZ
ENSSSCT00000008748	ENSSSCG00000007984	protein_coding	MRPL28
ENSSSCT00000010929	ENSSSCG00000009973	protein_coding	RHBDD3
ENSSSCT00000024579	ENSSSCG00000020777	protein_coding	--
ENSSSCT00000011439	ENSSSCG00000010453	protein_coding	IFIT1
ENSSSCT00000007517	ENSSSCG00000006864	protein_coding	CDC14A
ENSSSCT00000006828	ENSSSCG00000006231	protein_coding	CHD7
ENSSSCT00000005937	ENSSSCG00000005394	protein_coding	--
ENSSSCT00000025555	ENSSSCG00000022680	protein_coding	--
ENSSSCT00000005932	ENSSSCG00000005389	protein_coding	TEX10
ENSSSCT00000025228	ENSSSCG00000023479	protein_coding	NCKAP5
ENSSSCT00000000174	ENSSSCG00000000165	protein_coding	MTERF2
ENSSSCT00000018137	ENSSSCG00000016659	protein_coding	--
ENSSSCT00000008184	ENSSSCG00000007477	protein_coding	NFATC2
ENSSSCT00000011346	ENSSSCG00000024048	protein_coding	--
ENSSSCT00000011347	ENSSSCG00000021391	protein_coding	--
ENSSSCT00000011344	ENSSSCG00000021159	protein_coding	--
ENSSSCT00000011345	ENSSSCG00000026850	protein_coding	--
ENSSSCT00000016221	ENSSSCG00000014868	protein_coding	EMSY
ENSSSCT00000016222	ENSSSCG00000014869	protein_coding	LRRC32
ENSSSCT00000011503	ENSSSCG00000010513	protein_coding	LCOR
ENSSSCT00000006913	ENSSSCG00000006308	protein_coding	CREG1
ENSSSCT00000006917	ENSSSCG00000006310	protein_coding	POU2F1
ENSSSCT00000022688	ENSSSCG00000020790	protein_coding	--
ENSSSCT00000015437	ENSSSCG00000014133	protein_coding	RPS23
ENSSSCT00000015430	ENSSSCG00000014126	protein_coding	MSH3
ENSSSCT00000010326	ENSSSCG00000023863	protein_coding	--
ENSSSCT00000000371	ENSSSCG00000030158	protein_coding	--
ENSSSCT00000008349	ENSSSCG00000007609	protein_coding	ARPC1A
ENSSSCT00000014123	ENSSSCG00000012920	protein_coding	CORO1B
ENSSSCT00000016229	ENSSSCG00000014876	protein_coding	MYO7A
ENSSSCT00000012875	ENSSSCG00000011764	protein_coding	NDUFB5
ENSSSCT00000017803	ENSSSCG00000016348	protein_coding	--
ENSSSCT00000010101	ENSSSCG00000009222	protein_coding	SPARCL1
ENSSSCT00000013957	ENSSSCG00000012767	protein_coding	HAUS7
ENSSSCT00000010288	ENSSSCG00000009389	protein_coding	TRIM13
ENSSSCT00000010214	ENSSSCG00000009322	protein_coding	SLC46A3
ENSSSCT00000030250	ENSSSCG00000021461	protein_coding	SNF8
ENSSSCT00000010294	ENSSSCG00000009395	protein_coding	SETDB2
ENSSSCT00000019110	ENSSSCG00000017555	protein_coding	LUC7L3
ENSSSCT00000017979	ENSSSCG00000016512	protein_coding	ZC3HAV1
ENSSSCT00000005616	ENSSSCG00000005095	protein_coding	PRKCH
ENSSSCT00000028863	ENSSSCG00000022758	protein_coding	PECR
ENSSSCT00000005610	ENSSSCG00000005090	protein_coding	--
ENSSSCT00000005619	ENSSSCG00000005097	protein_coding	SNAPC1
ENSSSCT00000005618	ENSSSCG00000005096	protein_coding	HIF1A
ENSSSCT00000036390	ENSSSCG00000015896	protein_coding	FAP
ENSSSCT00000035598	ENSSSCG00000006381	protein_coding	CD84
ENSSSCT00000000190	ENSSSCG00000000181	protein_coding	RND1
ENSSSCT00000009348	ENSSSCG00000008543	protein_coding	--
ENSSSCT00000013313	ENSSSCG00000012171	protein_coding	PRDX4
ENSSSCT00000006137	ENSSSCG00000005584	protein_coding	CRB2
ENSSSCT00000031297	ENSSSCG00000021980	protein_coding	--
ENSSSCT00000026528	ENSSSCG00000029500	protein_coding	--
ENSSSCT00000026032	ENSSSCG00000027826	protein_coding	--
ENSSSCT00000026033	ENSSSCG00000023044	protein_coding	--
ENSSSCT00000000996	ENSSSCG00000000912	protein_coding	EEA1
ENSSSCT00000004450	ENSSSCG00000004024	protein_coding	--
ENSSSCT00000005108	ENSSSCG00000004625	protein_coding	LEO1
ENSSSCT00000014686	ENSSSCG00000013442	protein_coding	ABHD17A
ENSSSCT00000014931	ENSSSCG00000013667	protein_coding	COL5A3
ENSSSCT00000014688	ENSSSCG00000013444	protein_coding	BTBD2
ENSSSCT00000017377	ENSSSCG00000015959	protein_coding	RAPGEF4
ENSSSCT00000003869	ENSSSCG00000003483	protein_coding	PADI4
ENSSSCT00000002596	ENSSSCG00000002333	protein_coding	--
ENSSSCT00000013004	ENSSSCG00000011887	protein_coding	--
ENSSSCT00000017010	ENSSSCG00000015616	protein_coding	HSD11B1
ENSSSCT00000003863	ENSSSCG00000003477	protein_coding	NECAP2
ENSSSCT00000003864	ENSSSCG00000003478	protein_coding	--
ENSSSCT00000023772	ENSSSCG00000024156	protein_coding	--
ENSSSCT00000017708	ENSSSCG00000016263	protein_coding	--
ENSSSCT00000026140	ENSSSCG00000024477	protein_coding	--
ENSSSCT00000023642	ENSSSCG00000029073	protein_coding	CACNB4
ENSSSCT00000001648	ENSSSCG00000001477	protein_coding	RING1
ENSSSCT00000023319	ENSSSCG00000021812	protein_coding	MS4A1
ENSSSCT00000001644	ENSSSCG00000001475	protein_coding	LOC100155600
ENSSSCT00000027490	ENSSSCG00000028800	protein_coding	--
ENSSSCT00000007195	ENSSSCG00000006567	protein_coding	CRTC2
ENSSSCT00000023649	ENSSSCG00000022031	protein_coding	CHST2
ENSSSCT00000027035	ENSSSCG00000022636	protein_coding	--
ENSSSCT00000014595	ENSSSCG00000013364	protein_coding	--
ENSSSCT00000001007	ENSSSCG00000000922	protein_coding	--
ENSSSCT00000001000	ENSSSCG00000000916	protein_coding	LUM
ENSSSCT00000014591	ENSSSCG00000013360	protein_coding	TMEM86A
ENSSSCT00000005034	ENSSSCG00000004557	protein_coding	--
ENSSSCT00000005033	ENSSSCG00000004556	protein_coding	--
ENSSSCT00000003518	ENSSSCG00000003168	protein_coding	ALDH16A1
ENSSSCT00000009904	ENSSSCG00000009044	protein_coding	ANAPC10
ENSSSCT00000023267	ENSSSCG00000022042	protein_coding	--
ENSSSCT00000030523	ENSSSCG00000023379	protein_coding	UBE2L6
ENSSSCT00000023268	ENSSSCG00000026092	protein_coding	SREBF2
ENSSSCT00000001063	ENSSSCG00000000973	protein_coding	SELO
ENSSSCT00000027923	ENSSSCG00000026025	protein_coding	HMGCL
ENSSSCT00000027920	ENSSSCG00000022367	protein_coding	--
ENSSSCT00000000772	ENSSSCG00000000709	protein_coding	PLEKHG6
ENSSSCT00000027145	ENSSSCG00000020750	protein_coding	--
ENSSSCT00000030602	ENSSSCG00000030108	protein_coding	--
ENSSSCT00000024212	ENSSSCG00000024053	protein_coding	--
ENSSSCT00000004541	ENSSSCG00000004106	protein_coding	--
ENSSSCT00000027140	ENSSSCG00000025389	protein_coding	--
ENSSSCT00000024216	ENSSSCG00000024108	protein_coding	SLC43A2
ENSSSCT00000004961	ENSSSCG00000004490	protein_coding	SETBP1
ENSSSCT00000002113	ENSSSCG00000001887	protein_coding	SCAMP5
ENSSSCT00000005328	ENSSSCG00000004826	protein_coding	VIMP
ENSSSCT00000016384	ENSSSCG00000015020	protein_coding	BTG4
ENSSSCT00000036483	ENSSSCG00000015045	protein_coding	NCAM1
ENSSSCT00000024966	ENSSSCG00000025176	protein_coding	--
ENSSSCT00000023792	ENSSSCG00000025739	protein_coding	TCAIM
ENSSSCT00000024969	ENSSSCG00000027389	protein_coding	--
ENSSSCT00000012197	ENSSSCG00000011145	protein_coding	ASB13
ENSSSCT00000027810	ENSSSCG00000029774	protein_coding	RNF7
ENSSSCT00000024366	ENSSSCG00000030111	protein_coding	--
ENSSSCT00000024362	ENSSSCG00000027831	protein_coding	NOP10
ENSSSCT00000003246	ENSSSCG00000002933	protein_coding	ZNF382
ENSSSCT00000001911	ENSSSCG00000001711	protein_coding	CLIC5
ENSSSCT00000013864	ENSSSCG00000012682	protein_coding	PHF6
ENSSSCT00000015152	ENSSSCG00000013870	protein_coding	--
ENSSSCT00000001918	ENSSSCG00000001716	protein_coding	RCAN2
ENSSSCT00000013862	ENSSSCG00000012680	protein_coding	GPC3
ENSSSCT00000019368	ENSSSCG00000017796	protein_coding	--
ENSSSCT00000003885	ENSSSCG00000003497	protein_coding	PLA2G2D
ENSSSCT00000003641	ENSSSCG00000003278	protein_coding	-
ENSSSCT00000016762	ENSSSCG00000015387	protein_coding	TRA2A
ENSSSCT00000016766	ENSSSCG00000015391	protein_coding	CROT
ENSSSCT00000006747	ENSSSCG00000006153	protein_coding	FABP5
ENSSSCT00000004857	ENSSSCG00000004394	protein_coding	RPF2
ENSSSCT00000007619	ENSSSCG00000006954	protein_coding	--
ENSSSCT00000005857	ENSSSCG00000005318	protein_coding	CREB3
ENSSSCT00000029238	ENSSSCG00000027810	protein_coding	--
ENSSSCT00000012777	ENSSSCG00000011672	protein_coding	RASA2
ENSSSCT00000014330	ENSSSCG00000013110	protein_coding	TMEM109
ENSSSCT00000019523	ENSSSCG00000017939	protein_coding	--
ENSSSCT00000012423	ENSSSCG00000011346	protein_coding	--
ENSSSCT00000019524	ENSSSCG00000017940	protein_coding	GPS2
ENSSSCT00000029308	ENSSSCG00000028077	protein_coding	--
ENSSSCT00000025870	ENSSSCG00000021663	protein_coding	--
ENSSSCT00000016699	ENSSSCG00000015326	protein_coding	COL1A2
ENSSSCT00000028527	ENSSSCG00000026778	protein_coding	--
ENSSSCT00000016695	ENSSSCG00000015322	protein_coding	TFPI2
ENSSSCT00000008971	ENSSSCG00000008192	protein_coding	TMEM131
ENSSSCT00000012515	ENSSSCG00000011435	protein_coding	--
ENSSSCT00000017589	ENSSSCG00000016156	protein_coding	ACADL
ENSSSCT00000011647	ENSSSCG00000010648	protein_coding	CCDC186
ENSSSCT00000011646	ENSSSCG00000010647	protein_coding	ADRB1
ENSSSCT00000017587	ENSSSCG00000016154	protein_coding	--
ENSSSCT00000017584	ENSSSCG00000016151	protein_coding	MAP2
ENSSSCT00000033051	ENSSSCG00000005955	protein_coding	EFR3A
ENSSSCT00000014202	ENSSSCG00000012992	protein_coding	FRMD8
ENSSSCT00000025302	ENSSSCG00000024059	protein_coding	VAT1
ENSSSCT00000029122	ENSSSCG00000027372	protein_coding	SAMD9
ENSSSCT00000035948	ENSSSCG00000000087	protein_coding	TAB1
ENSSSCT00000033291	ENSSSCG00000012569	protein_coding	ATG4A
ENSSSCT00000012739	ENSSSCG00000011639	protein_coding	SRPRB
ENSSSCT00000018238	ENSSSCG00000016756	protein_coding	BLVRA
ENSSSCT00000035940	ENSSSCG00000018045	protein_coding	--
ENSSSCT00000031739	ENSSSCG00000025209	protein_coding	--
ENSSSCT00000008940	ENSSSCG00000008163	protein_coding	IL1R2
ENSSSCT00000016187	ENSSSCG00000014835	protein_coding	C2CD3
ENSSSCT00000031734	ENSSSCG00000022317	protein_coding	SLC38A10
ENSSSCT00000006698	ENSSSCG00000006106	protein_coding	CDH17
ENSSSCT00000016347	ENSSSCG00000029675	protein_coding	MMP8
ENSSSCT00000016341	ENSSSCG00000014979	protein_coding	CEP126
ENSSSCT00000004214	ENSSSCG00000003808	protein_coding	-
ENSSSCT00000025090	ENSSSCG00000027681	protein_coding	--
ENSSSCT00000025093	ENSSSCG00000026023	protein_coding	--
ENSSSCT00000025547	ENSSSCG00000020961	protein_coding	--
ENSSSCT00000005928	ENSSSCG00000005386	protein_coding	STX17
ENSSSCT00000013641	ENSSSCG00000012474	protein_coding	DIAPH2
ENSSSCT00000014119	ENSSSCG00000012916	protein_coding	--
ENSSSCT00000005920	ENSSSCG00000005380	protein_coding	--
ENSSSCT00000025549	ENSSSCG00000023052	protein_coding	--
ENSSSCT00000013646	ENSSSCG00000012479	protein_coding	--
ENSSSCT00000032276	ENSSSCG00000026418	protein_coding	--
ENSSSCT00000011352	ENSSSCG00000010370	protein_coding	ANXA8
ENSSSCT00000034415	ENSSSCG00000015716	protein_coding	MARCO
ENSSSCT00000011518	ENSSSCG00000010528	protein_coding	ZFYVE27
ENSSSCT00000006968	ENSSSCG00000006359	protein_coding	ADAMTS4
ENSSSCT00000029641	ENSSSCG00000027629	protein_coding	CDIPT
ENSSSCT00000011513	ENSSSCG00000010523	protein_coding	HOGA1
ENSSSCT00000031428	ENSSSCG00000024018	protein_coding	SLC16A3
ENSSSCT00000011517	ENSSSCG00000010527	protein_coding	MARVELD1
ENSSSCT00000016236	ENSSSCG00000014882	protein_coding	RSF1
ENSSSCT00000025781	ENSSSCG00000029578	protein_coding	--
ENSSSCT00000025780	ENSSSCG00000029039	protein_coding	--
ENSSSCT00000000344	ENSSSCG00000000323	protein_coding	OR6C76
ENSSSCT00000030395	ENSSSCG00000024437	protein_coding	AP2M1
ENSSSCT00000015420	ENSSSCG00000014116	protein_coding	--
ENSSSCT00000015525	ENSSSCG00000014207	protein_coding	APC
ENSSSCT00000022304	ENSSSCG00000023792	protein_coding	SNRNP70
ENSSSCT00000015889	ENSSSCG00000014539	protein_coding	ZFP62
ENSSSCT00000018340	ENSSSCG00000016843	protein_coding	C5orf42
ENSSSCT00000002938	ENSSSCG00000002648	protein_coding	CBFA2T3
ENSSSCT00000036499	ENSSSCG00000031023	protein_coding	--
ENSSSCT00000012842	ENSSSCG00000011731	protein_coding	SMC4
ENSSSCT00000030066	ENSSSCG00000021255	protein_coding	ADA
ENSSSCT00000032308	ENSSSCG00000024019	protein_coding	GTF2H5
ENSSSCT00000002844	ENSSSCG00000002559	protein_coding	CDCA4
ENSSSCT00000025437	ENSSSCG00000023806	protein_coding	LRRN1
ENSSSCT00000004067	ENSSSCG00000003671	protein_coding	--
ENSSSCT00000004066	ENSSSCG00000003670	protein_coding	RLF
ENSSSCT00000013264	ENSSSCG00000012125	protein_coding	OFD1
ENSSSCT00000000309	ENSSSCG00000000288	protein_coding	--
ENSSSCT00000017905	ENSSSCG00000016443	protein_coding	TMEM176A
ENSSSCT00000017902	ENSSSCG00000016441	protein_coding	ABCF2
ENSSSCT00000006038	ENSSSCG00000005492	protein_coding	TMEM268
ENSSSCT00000036384	ENSSSCG00000001377	protein_coding	--
ENSSSCT00000009022	ENSSSCG00000008239	protein_coding	CAPG
ENSSSCT00000009020	ENSSSCG00000008237	protein_coding	RETSAT
ENSSSCT00000009755	ENSSSCG00000008909	protein_coding	--
ENSSSCT00000009025	ENSSSCG00000008241	protein_coding	TCF7L1
ENSSSCT00000009110	ENSSSCG00000008319	protein_coding	CD207
ENSSSCT00000004191	ENSSSCG00000003788	protein_coding	PTGER3
ENSSSCT00000001341	ENSSSCG00000001233	protein_coding	TRIM26
ENSSSCT00000013465	ENSSSCG00000012314	protein_coding	--
ENSSSCT00000012996	ENSSSCG00000011880	protein_coding	EAF2
ENSSSCT00000014032	ENSSSCG00000012837	protein_coding	CHID1
ENSSSCT00000014453	ENSSSCG00000013233	protein_coding	CELF1
ENSSSCT00000014452	ENSSSCG00000013232	protein_coding	MTCH2
ENSSSCT00000008090	ENSSSCG00000007391	protein_coding	MATN4
ENSSSCT00000014459	ENSSSCG00000013239	protein_coding	PSMC3
ENSSSCT00000003811	ENSSSCG00000003433	protein_coding	PLOD1
ENSSSCT00000031312	ENSSSCG00000028015	protein_coding	GAL3ST3
ENSSSCT00000016981	ENSSSCG00000015588	protein_coding	ANGEL2
ENSSSCT00000026024	ENSSSCG00000023589	protein_coding	--
ENSSSCT00000000838	ENSSSCG00000000774	protein_coding	USP18
ENSSSCT00000016982	ENSSSCG00000015589	protein_coding	VASH2
ENSSSCT00000026021	ENSSSCG00000022190	protein_coding	UBE2V2
ENSSSCT00000016987	ENSSSCG00000015594	protein_coding	--
ENSSSCT00000026022	ENSSSCG00000023917	protein_coding	--
ENSSSCT00000004681	ENSSSCG00000004236	protein_coding	--
ENSSSCT00000012603	ENSSSCG00000011516	protein_coding	EIF4E3
ENSSSCT00000023127	ENSSSCG00000026170	protein_coding	--
ENSSSCT00000017064	ENSSSCG00000015666	protein_coding	--
ENSSSCT00000014697	ENSSSCG00000013453	protein_coding	--
ENSSSCT00000014695	ENSSSCG00000013451	protein_coding	--
ENSSSCT00000014692	ENSSSCG00000013448	protein_coding	MKNK2
ENSSSCT00000015984	ENSSSCG00000014633	protein_coding	PRKCDBP
ENSSSCT00000029015	ENSSSCG00000029745	protein_coding	FAM193A
ENSSSCT00000033958	ENSSSCG00000015368	protein_coding	HDAC9
ENSSSCT00000023496	ENSSSCG00000028802	protein_coding	--
ENSSSCT00000009935	ENSSSCG00000009070	protein_coding	--
ENSSSCT00000023491	ENSSSCG00000021860	protein_coding	--
ENSSSCT00000003878	ENSSSCG00000003491	protein_coding	AKR7A2
ENSSSCT00000030889	ENSSSCG00000026722	protein_coding	PHF14
ENSSSCT00000022574	ENSSSCG00000030657	protein_coding	--
ENSSSCT00000013078	ENSSSCG00000011952	protein_coding	--
ENSSSCT00000007189	ENSSSCG00000006562	protein_coding	GATAD2B
ENSSSCT00000007188	ENSSSCG00000006561	protein_coding	SLC39A1
ENSSSCT00000026159	ENSSSCG00000023871	protein_coding	--
ENSSSCT00000007186	ENSSSCG00000006559	protein_coding	JTB
ENSSSCT00000027316	ENSSSCG00000027573	protein_coding	RPL29
ENSSSCT00000004538	ENSSSCG00000004103	protein_coding	PCMT1
ENSSSCT00000002695	ENSSSCG00000002426	protein_coding	ZC3H14
ENSSSCT00000027000	ENSSSCG00000029935	protein_coding	--
ENSSSCT00000001012	ENSSSCG00000000927	protein_coding	TMTC3
ENSSSCT00000014581	ENSSSCG00000013351	protein_coding	--
ENSSSCT00000014852	ENSSSCG00000013598	protein_coding	KANK3
ENSSSCT00000027556	ENSSSCG00000028025	protein_coding	WDR74
ENSSSCT00000014856	ENSSSCG00000013602	protein_coding	HNRNPM
ENSSSCT00000003508	ENSSSCG00000003158	protein_coding	DHDH
ENSSSCT00000016506	ENSSSCG00000015140	protein_coding	--
ENSSSCT00000003500	ENSSSCG00000003153	protein_coding	FTL
ENSSSCT00000017170	ENSSSCG00000015769	protein_coding	SPCS3
ENSSSCT00000031745	ENSSSCG00000029876	protein_coding	SOD2
ENSSSCT00000027950	ENSSSCG00000025578	protein_coding	--
ENSSSCT00000002276	ENSSSCG00000002034	protein_coding	ACIN1
ENSSSCT00000000746	ENSSSCG00000000685	protein_coding	TPI1
ENSSSCT00000022979	ENSSSCG00000029570	protein_coding	--
ENSSSCT00000028665	ENSSSCG00000025188	protein_coding	--
ENSSSCT00000023788	ENSSSCG00000028022	protein_coding	COL6A2
ENSSSCT00000009801	ENSSSCG00000008947	protein_coding	COX18
ENSSSCT00000024972	ENSSSCG00000029310	protein_coding	STK40
ENSSSCT00000013100	ENSSSCG00000011972	protein_coding	FILIP1L
ENSSSCT00000035130	ENSSSCG00000011226	protein_coding	--
ENSSSCT00000012183	ENSSSCG00000011131	protein_coding	PRKCQ
ENSSSCT00000001906	ENSSSCG00000001706	protein_coding	AARS2
ENSSSCT00000028089	ENSSSCG00000025486	protein_coding	MDH2
ENSSSCT00000001908	ENSSSCG00000001708	protein_coding	CDC5L
ENSSSCT00000027174	ENSSSCG00000022401	protein_coding	AGTRAP
ENSSSCT00000018976	ENSSSCG00000017430	protein_coding	EIF1
ENSSSCT00000027179	ENSSSCG00000030617	protein_coding	--
ENSSSCT00000029429	ENSSSCG00000020698	protein_coding	--
ENSSSCT00000016759	ENSSSCG00000015384	protein_coding	TOMM7
ENSSSCT00000007168	ENSSSCG00000006543	protein_coding	ADAR
ENSSSCT00000030461	ENSSSCG00000021964	protein_coding	PIK3R1
ENSSSCT00000001838	ENSSSCG00000001653	protein_coding	PEX6
ENSSSCT00000030728	ENSSSCG00000029362	protein_coding	CHMP2A
ENSSSCT00000019539	ENSSSCG00000017955	protein_coding	MPDU1
ENSSSCT00000008501	ENSSSCG00000007754	protein_coding	--
ENSSSCT00000028332	ENSSSCG00000028827	protein_coding	PARVA
ENSSSCT00000014322	ENSSSCG00000013102	protein_coding	MS4A7
ENSSSCT00000012433	ENSSSCG00000011356	protein_coding	UQCRC1
ENSSSCT00000019536	ENSSSCG00000017952	protein_coding	SAT2
ENSSSCT00000015305	ENSSSCG00000014012	protein_coding	GFPT2
ENSSSCT00000004990	ENSSSCG00000004518	protein_coding	SKA1
ENSSSCT00000012501	ENSSSCG00000011421	protein_coding	MANF
ENSSSCT00000003090	ENSSSCG00000002790	protein_coding	TMEM208
ENSSSCT00000004999	ENSSSCG00000004525	protein_coding	--
ENSSSCT00000019408	ENSSSCG00000017833	protein_coding	--
ENSSSCT00000003097	ENSSSCG00000002797	protein_coding	--
ENSSSCT00000017599	ENSSSCG00000016164	protein_coding	IKZF2
ENSSSCT00000011635	ENSSSCG00000010638	protein_coding	TCF7L2
ENSSSCT00000029688	ENSSSCG00000025349	protein_coding	CCDC14
ENSSSCT00000031639	ENSSSCG00000023328	protein_coding	--
ENSSSCT00000017594	ENSSSCG00000016159	protein_coding	--
ENSSSCT00000010903	ENSSSCG00000009951	protein_coding	SGSM1
ENSSSCT00000007577	ENSSSCG00000022397	protein_coding	--
ENSSSCT00000010906	ENSSSCG00000009953	protein_coding	KIAA1671
ENSSSCT00000007570	ENSSSCG00000006912	protein_coding	HFM1
ENSSSCT00000019621	ENSSSCG00000018026	protein_coding	--
ENSSSCT00000008214	ENSSSCG00000007502	protein_coding	SPO11
ENSSSCT00000019622	ENSSSCG00000018027	protein_coding	--
ENSSSCT00000029114	ENSSSCG00000003768	protein_coding	NEXN
ENSSSCT00000025843	ENSSSCG00000026216	protein_coding	--
ENSSSCT00000018758	ENSSSCG00000017231	protein_coding	NAT9
ENSSSCT00000008163	ENSSSCG00000007459	protein_coding	--
ENSSSCT00000025846	ENSSSCG00000026266	protein_coding	--
ENSSSCT00000025847	ENSSSCG00000025221	protein_coding	--
ENSSSCT00000029113	ENSSSCG00000027645	protein_coding	--
ENSSSCT00000012728	ENSSSCG00000011631	protein_coding	UBA5
ENSSSCT00000018202	ENSSSCG00000016721	protein_coding	DBNL
ENSSSCT00000018754	ENSSSCG00000017227	protein_coding	FDXR
ENSSSCT00000018207	ENSSSCG00000016726	protein_coding	ADCY1
ENSSSCT00000006681	ENSSSCG00000006090	protein_coding	MTERF3
ENSSSCT00000007157	ENSSSCG00000006535	protein_coding	PMVK
ENSSSCT00000000230	ENSSSCG00000000215	protein_coding	SMARCD1
ENSSSCT00000011180	ENSSSCG00000010214	protein_coding	CDK1
ENSSSCT00000030653	ENSSSCG00000028829	protein_coding	HIST1H3E
ENSSSCT00000005489	ENSSSCG00000004977	protein_coding	--
ENSSSCT00000030385	ENSSSCG00000021309	protein_coding	TRDMT1
ENSSSCT00000030384	ENSSSCG00000029239	protein_coding	MZB1
ENSSSCT00000005484	ENSSSCG00000004972	protein_coding	--
ENSSSCT00000018115	ENSSSCG00000016637	protein_coding	TFEC
ENSSSCT00000032249	ENSSSCG00000030368	protein_coding	HSP70.2
ENSSSCT00000000853	ENSSSCG00000000787	protein_coding	--
ENSSSCT00000006979	ENSSSCG00000006369	protein_coding	F11R
ENSSSCT00000011568	ENSSSCG00000010575	protein_coding	PPRC1
ENSSSCT00000011325	ENSSSCG00000010345	protein_coding	GHITM
ENSSSCT00000011566	ENSSSCG00000010573	protein_coding	HPS6
ENSSSCT00000018591	ENSSSCG00000017075	protein_coding	MFAP3
ENSSSCT00000011564	ENSSSCG00000010571	protein_coding	C10orf76
ENSSSCT00000011297	ENSSSCG00000010320	protein_coding	VDAC2
ENSSSCT00000007977	ENSSSCG00000007291	protein_coding	EDEM2
ENSSSCT00000011293	ENSSSCG00000010316	protein_coding	KAT6B
ENSSSCT00000008326	ENSSSCG00000007586	protein_coding	FSCN1
ENSSSCT00000015453	ENSSSCG00000014149	protein_coding	MEF2C
ENSSSCT00000022316	ENSSSCG00000020758	protein_coding	--
ENSSSCT00000015537	ENSSSCG00000014219	protein_coding	CDO1
ENSSSCT00000018577	ENSSSCG00000017062	protein_coding	--
ENSSSCT00000022310	ENSSSCG00000027526	protein_coding	MAN1B1
ENSSSCT00000022318	ENSSSCG00000030611	protein_coding	--
ENSSSCT00000014680	ENSSSCG00000013436	protein_coding	--
ENSSSCT00000011362	ENSSSCG00000010380	protein_coding	MAPK8
ENSSSCT00000036552	ENSSSCG00000024982	protein_coding	LITAF
ENSSSCT00000026071	ENSSSCG00000022295	protein_coding	C9orf16
ENSSSCT00000030273	ENSSSCG00000028925	protein_coding	--
ENSSSCT00000005554	ENSSSCG00000005038	protein_coding	PSMC6
ENSSSCT00000005558	ENSSSCG00000005042	protein_coding	--
ENSSSCT00000008456	ENSSSCG00000007713	protein_coding	WBSCR22
ENSSSCT00000032020	ENSSSCG00000026288	protein_coding	--
ENSSSCT00000002630	ENSSSCG00000002366	protein_coding	NPC2
ENSSSCT00000027876	ENSSSCG00000020962	protein_coding	DYNLL2
ENSSSCT00000013293	ENSSSCG00000012152	protein_coding	SCML1
ENSSSCT00000010010	ENSSSCG00000009142	protein_coding	SEC24B
ENSSSCT00000011253	ENSSSCG00000010281	protein_coding	PSAP
ENSSSCT00000027531	ENSSSCG00000028876	protein_coding	--
ENSSSCT00000006027	ENSSSCG00000005481	protein_coding	--
ENSSSCT00000010018	ENSSSCG00000009148	protein_coding	LEF1
ENSSSCT00000009741	ENSSSCG00000008898	protein_coding	HOPX
ENSSSCT00000009107	ENSSSCG00000008316	protein_coding	NAGK
ENSSSCT00000009103	ENSSSCG00000008312	protein_coding	--
ENSSSCT00000025830	ENSSSCG00000028756	protein_coding	--
ENSSSCT00000001334	ENSSSCG00000001231	protein_coding	SLA-1
ENSSSCT00000012989	ENSSSCG00000011875	protein_coding	PARP15
ENSSSCT00000012988	ENSSSCG00000011874	protein_coding	PARP14
ENSSSCT00000004933	ENSSSCG00000004466	protein_coding	TTK
ENSSSCT00000026235	ENSSSCG00000029992	protein_coding	--
ENSSSCT00000017356	ENSSSCG00000015940	protein_coding	--
ENSSSCT00000005121	ENSSSCG00000004636	protein_coding	TRPM7
ENSSSCT00000017354	ENSSSCG00000015938	protein_coding	SSB
ENSSSCT00000017350	ENSSSCG00000015934	protein_coding	PPIG
ENSSSCT00000009321	ENSSSCG00000008517	protein_coding	SPAST
ENSSSCT00000009320	ENSSSCG00000008516	protein_coding	DPY30
ENSSSCT00000026836	ENSSSCG00000020921	protein_coding	USP33
ENSSSCT00000026837	ENSSSCG00000021531	protein_coding	C9orf85
ENSSSCT00000009637	ENSSSCG00000008807	protein_coding	GUF1
ENSSSCT00000026833	ENSSSCG00000026922	protein_coding	DRAM2
ENSSSCT00000026789	ENSSSCG00000029393	protein_coding	--
ENSSSCT00000009639	ENSSSCG00000008809	protein_coding	GABRG1
ENSSSCT00000019506	ENSSSCG00000017923	protein_coding	ALOX15
ENSSSCT00000036604	ENSSSCG00000012434	protein_coding	--
ENSSSCT00000023950	ENSSSCG00000022230	protein_coding	CD9
ENSSSCT00000026306	ENSSSCG00000030232	protein_coding	--
ENSSSCT00000008921	ENSSSCG00000008144	protein_coding	NCK2
ENSSSCT00000026917	ENSSSCG00000022343	protein_coding	ENO1
ENSSSCT00000014662	ENSSSCG00000013418	protein_coding	CFD
ENSSSCT00000000392	ENSSSCG00000000369	protein_coding	PYM1
ENSSSCT00000013065	ENSSSCG00000011940	protein_coding	DZIP3
ENSSSCT00000009250	ENSSSCG00000008448	protein_coding	PREPL
ENSSSCT00000009924	ENSSSCG00000009060	protein_coding	--
ENSSSCT00000007378	ENSSSCG00000006735	protein_coding	--
ENSSSCT00000026492	ENSSSCG00000026385	protein_coding	--
ENSSSCT00000006200	ENSSSCG00000005638	protein_coding	LCN2
ENSSSCT00000026943	ENSSSCG00000028875	protein_coding	HAVCR2
ENSSSCT00000013069	ENSSSCG00000011943	protein_coding	--
ENSSSCT00000001460	ENSSSCG00000001344	protein_coding	--
ENSSSCT00000026161	ENSSSCG00000028624	protein_coding	--
ENSSSCT00000023663	ENSSSCG00000028019	protein_coding	LRRC59
ENSSSCT00000026169	ENSSSCG00000025912	protein_coding	URI1
ENSSSCT00000023666	ENSSSCG00000021493	protein_coding	--
ENSSSCT00000023667	ENSSSCG00000022049	protein_coding	-
ENSSSCT00000014868	ENSSSCG00000013613	protein_coding	ELOF1
ENSSSCT00000027019	ENSSSCG00000022273	protein_coding	--
ENSSSCT00000027018	ENSSSCG00000026784	protein_coding	LMNB2
ENSSSCT00000027543	ENSSSCG00000026547	protein_coding	SLC45A3
ENSSSCT00000001791	ENSSSCG00000001611	protein_coding	--
ENSSSCT00000008006	ENSSSCG00000026071	protein_coding	--
ENSSSCT00000017689	ENSSSCG00000016245	protein_coding	--
ENSSSCT00000002040	ENSSSCG00000001821	protein_coding	UNC45A
ENSSSCT00000029443	ENSSSCG00000020699	protein_coding	--
ENSSSCT00000017106	ENSSSCG00000015706	protein_coding	LYPD1
ENSSSCT00000023201	ENSSSCG00000009912	protein_coding	POP5
ENSSSCT00000027761	ENSSSCG00000021019	protein_coding	--
ENSSSCT00000027940	ENSSSCG00000028662	protein_coding	--
ENSSSCT00000026621	ENSSSCG00000024907	protein_coding	SDHAF1
ENSSSCT00000002263	ENSSSCG00000002023	protein_coding	PABPN1
ENSSSCT00000026620	ENSSSCG00000027766	protein_coding	ZNF467
ENSSSCT00000027305	ENSSSCG00000025588	protein_coding	FJX1
ENSSSCT00000014485	ENSSSCG00000013261	protein_coding	CHRM4
ENSSSCT00000005302	ENSSSCG00000004803	protein_coding	ACTC1
ENSSSCT00000014488	ENSSSCG00000013264	protein_coding	--
ENSSSCT00000028657	ENSSSCG00000023616	protein_coding	CDC34
ENSSSCT00000028650	ENSSSCG00000023288	protein_coding	--
ENSSSCT00000023513	ENSSSCG00000022864	protein_coding	--
ENSSSCT00000023516	ENSSSCG00000028388	protein_coding	--
ENSSSCT00000023518	ENSSSCG00000024385	protein_coding	RNASEH2B
ENSSSCT00000024306	ENSSSCG00000026563	protein_coding	--
ENSSSCT00000003224	ENSSSCG00000002919	protein_coding	TYROBP
ENSSSCT00000018968	ENSSSCG00000017422	protein_coding	--
ENSSSCT00000027161	ENSSSCG00000030295	protein_coding	--
ENSSSCT00000027168	ENSSSCG00000025473	protein_coding	PIGM
ENSSSCT00000007155	ENSSSCG00000006533	protein_coding	--
ENSSSCT00000023680	ENSSSCG00000022989	protein_coding	ZNF704
ENSSSCT00000023681	ENSSSCG00000030385	protein_coding	-
ENSSSCT00000006323	ENSSSCG00000005751	protein_coding	COL5A1
ENSSSCT00000029920	ENSSSCG00000029695	protein_coding	--
ENSSSCT00000017610	ENSSSCG00000016174	protein_coding	FN1
ENSSSCT00000007158	ENSSSCG00000006536	protein_coding	--
ENSSSCT00000029926	ENSSSCG00000030467	protein_coding	PHC3
ENSSSCT00000031624	ENSSSCG00000025085	protein_coding	--
ENSSSCT00000024413	ENSSSCG00000025058	protein_coding	-
ENSSSCT00000031628	ENSSSCG00000025627	protein_coding	--
ENSSSCT00000004832	ENSSSCG00000004371	protein_coding	--
ENSSSCT00000006766	ENSSSCG00000006172	protein_coding	PI15
ENSSSCT00000008515	ENSSSCG00000007768	protein_coding	STX4
ENSSSCT00000005834	ENSSSCG00000005297	protein_coding	DNAJB5
ENSSSCT00000005837	ENSSSCG00000005300	protein_coding	VCP
ENSSSCT00000025147	ENSSSCG00000021411	protein_coding	HIST1H2BD
ENSSSCT00000005884	ENSSSCG00000005345	protein_coding	PAX5
ENSSSCT00000003138	ENSSSCG00000002837	protein_coding	--
ENSSSCT00000025920	ENSSSCG00000025114	protein_coding	FMNL3
ENSSSCT00000028340	ENSSSCG00000028450	protein_coding	--
ENSSSCT00000005885	ENSSSCG00000005346	protein_coding	ZCCHC7
ENSSSCT00000028507	ENSSSCG00000027348	protein_coding	WIPF1
ENSSSCT00000028501	ENSSSCG00000024375	protein_coding	--
ENSSSCT00000013840	ENSSSCG00000012659	protein_coding	ZNF280C
ENSSSCT00000012532	ENSSSCG00000011451	protein_coding	ITIH3
ENSSSCT00000019437	ENSSSCG00000017861	protein_coding	ASPA
ENSSSCT00000011993	ENSSSCG00000010957	protein_coding	--
ENSSSCT00000006567	ENSSSCG00000005984	protein_coding	ZHX1
ENSSSCT00000004941	ENSSSCG00000004473	protein_coding	--
ENSSSCT00000004235	ENSSSCG00000003826	protein_coding	HOOK1
ENSSSCT00000004239	ENSSSCG00000003830	protein_coding	MYSM1
ENSSSCT00000004949	ENSSSCG00000004479	protein_coding	FILIP1
ENSSSCT00000030239	ENSSSCG00000028445	protein_coding	ZNF691
ENSSSCT00000019346	ENSSSCG00000017774	protein_coding	FAM222B
ENSSSCT00000025850	ENSSSCG00000022361	protein_coding	--
ENSSSCT00000025324	ENSSSCG00000023711	protein_coding	ATXN7L3B
ENSSSCT00000022818	ENSSSCG00000028272	protein_coding	--
ENSSSCT00000022819	ENSSSCG00000024151	protein_coding	--
ENSSSCT00000012712	ENSSSCG00000011615	protein_coding	RAB7A
ENSSSCT00000019341	ENSSSCG00000017769	protein_coding	-
ENSSSCT00000012718	ENSSSCG00000011621	protein_coding	SEC61A1
ENSSSCT00000019349	ENSSSCG00000017777	protein_coding	FLOT2
ENSSSCT00000008685	ENSSSCG00000007924	protein_coding	--
ENSSSCT00000035898	ENSSSCG00000010451	protein_coding	IFIT2
ENSSSCT00000012405	ENSSSCG00000011329	protein_coding	--
ENSSSCT00000012407	ENSSSCG00000011331	protein_coding	--
ENSSSCT00000031717	ENSSSCG00000029849	protein_coding	S1PR1
ENSSSCT00000015199	ENSSSCG00000013913	protein_coding	KLHL26
ENSSSCT00000029108	ENSSSCG00000022866	protein_coding	NXF1
ENSSSCT00000031712	ENSSSCG00000022729	protein_coding	KLHL6
ENSSSCT00000015193	ENSSSCG00000013907	protein_coding	--
ENSSSCT00000024525	ENSSSCG00000023495	protein_coding	PITHD1
ENSSSCT00000011192	ENSSSCG00000010226	protein_coding	JMJD1C
ENSSSCT00000030662	ENSSSCG00000021729	protein_coding	--
ENSSSCT00000015194	ENSSSCG00000013908	protein_coding	C19orf60
ENSSSCT00000025213	ENSSSCG00000021408	protein_coding	TKT
ENSSSCT00000005947	ENSSSCG00000005404	protein_coding	--
ENSSSCT00000011175	ENSSSCG00000010209	protein_coding	FAM13C
ENSSSCT00000022251	ENSSSCG00000022314	protein_coding	--
ENSSSCT00000032254	ENSSSCG00000008406	protein_coding	CCDC88A
ENSSSCT00000007891	ENSSSCG00000007211	protein_coding	ZCCHC3
ENSSSCT00000022259	ENSSSCG00000028962	protein_coding	--
ENSSSCT00000007969	ENSSSCG00000007284	protein_coding	NCOA6
ENSSSCT00000006781	ENSSSCG00000006187	protein_coding	MSC
ENSSSCT00000007963	ENSSSCG00000007278	protein_coding	AHCY
ENSSSCT00000016256	ENSSSCG00000014901	protein_coding	PCF11
ENSSSCT00000007964	ENSSSCG00000007279	protein_coding	DYNLRB1
ENSSSCT00000019294	ENSSSCG00000017727	protein_coding	TMEM98
ENSSSCT00000019290	ENSSSCG00000017723	protein_coding	CCL2
ENSSSCT00000006949	ENSSSCG00000006341	protein_coding	SH2D1B
ENSSSCT00000015502	ENSSSCG00000014189	protein_coding	--
ENSSSCT00000018366	ENSSSCG00000016863	protein_coding	OXCT1
ENSSSCT00000010394	ENSSSCG00000009479	protein_coding	RBM26
ENSSSCT00000022352	ENSSSCG00000024752	protein_coding	ALDH4A1
ENSSSCT00000011375	ENSSSCG00000010391	protein_coding	ERCC6
ENSSSCT00000030040	ENSSSCG00000025831	protein_coding	--
ENSSSCT00000010715	ENSSSCG00000009773	protein_coding	RILPL1
ENSSSCT00000008021	ENSSSCG00000007330	protein_coding	--
ENSSSCT00000008029	ENSSSCG00000007337	protein_coding	--
ENSSSCT00000025456	ENSSSCG00000024265	protein_coding	--
ENSSSCT00000000035	ENSSSCG00000000033	protein_coding	TSPO
ENSSSCT00000032036	ENSSSCG00000030186	protein_coding	--
ENSSSCT00000017290	ENSSSCG00000015878	protein_coding	--
ENSSSCT00000017929	ENSSSCG00000016466	protein_coding	GSTK1
ENSSSCT00000010028	ENSSSCG00000009157	protein_coding	TET2
ENSSSCT00000010151	ENSSSCG00000009270	protein_coding	--
ENSSSCT00000014713	ENSSSCG00000013468	protein_coding	THOP1
ENSSSCT00000026224	ENSSSCG00000021712	protein_coding	--
ENSSSCT00000026222	ENSSSCG00000024315	protein_coding	--
ENSSSCT00000015612	ENSSSCG00000014289	protein_coding	UQCRQ
ENSSSCT00000009485	ENSSSCG00000008668	protein_coding	RBAK
ENSSSCT00000034940	ENSSSCG00000012077	protein_coding	MX1
ENSSSCT00000009314	ENSSSCG00000008511	protein_coding	--
ENSSSCT00000024488	ENSSSCG00000022801	protein_coding	S100PBP
ENSSSCT00000031496	ENSSSCG00000022823	protein_coding	--
ENSSSCT00000006168	ENSSSCG00000005609	protein_coding	--
ENSSSCT00000006169	ENSSSCG00000005610	protein_coding	--
ENSSSCT00000001258	ENSSSCG00000022394	protein_coding	--
ENSSSCT00000014679	ENSSSCG00000013435	protein_coding	MBD3
ENSSSCT00000010501	ENSSSCG00000009580	protein_coding	S1PR3
ENSSSCT00000026319	ENSSSCG00000022836	protein_coding	--
ENSSSCT00000014675	ENSSSCG00000013431	protein_coding	ATP5D
ENSSSCT00000023479	ENSSSCG00000030653	protein_coding	GANAB
ENSSSCT00000013059	ENSSSCG00000011935	protein_coding	--
ENSSSCT00000009266	ENSSSCG00000008464	protein_coding	--
ENSSSCT00000030863	ENSSSCG00000021965	protein_coding	--
ENSSSCT00000026955	ENSSSCG00000027614	protein_coding	--
ENSSSCT00000030864	ENSSSCG00000024134	protein_coding	MGLL
ENSSSCT00000025862	ENSSSCG00000023374	protein_coding	SRGN
ENSSSCT00000000877	ENSSSCG00000000808	protein_coding	--
ENSSSCT00000026173	ENSSSCG00000026813	protein_coding	SURF4
ENSSSCT00000002780	ENSSSCG00000002502	protein_coding	ATG2B
ENSSSCT00000026557	ENSSSCG00000029074	protein_coding	--
ENSSSCT00000034968	ENSSSCG00000002669	protein_coding	CRISPLD2
ENSSSCT00000023072	ENSSSCG00000026129	protein_coding	--
ENSSSCT00000027574	ENSSSCG00000024312	protein_coding	ID4
ENSSSCT00000026803	ENSSSCG00000022551	protein_coding	--
ENSSSCT00000001071	ENSSSCG00000000981	protein_coding	CRELD2
ENSSSCT00000023078	ENSSSCG00000021567	protein_coding	--
ENSSSCT00000027572	ENSSSCG00000026732	protein_coding	--
ENSSSCT00000026008	ENSSSCG00000025567	protein_coding	--
ENSSSCT00000035562	ENSSSCG00000011025	protein_coding	--
ENSSSCT00000000046	ENSSSCG00000000042	protein_coding	--
ENSSSCT00000014878	ENSSSCG00000013623	protein_coding	RAB3D
ENSSSCT00000025358	ENSSSCG00000022504	protein_coding	--
ENSSSCT00000017116	ENSSSCG00000015716	protein_coding	MARCO
ENSSSCT00000017118	ENSSSCG00000015718	protein_coding	C2orf76
ENSSSCT00000000042	ENSSSCG00000000040	protein_coding	SEPT3
ENSSSCT00000002090	ENSSSCG00000001865	protein_coding	SCAPER
ENSSSCT00000027757	ENSSSCG00000028711	protein_coding	CASP1
ENSSSCT00000024881	ENSSSCG00000030672	protein_coding	ZNF692
ENSSSCT00000019070	ENSSSCG00000017516	protein_coding	SP2
ENSSSCT00000005376	ENSSSCG00000004870	protein_coding	--
ENSSSCT00000001679	ENSSSCG00000001506	protein_coding	RGL2
ENSSSCT00000031243	ENSSSCG00000022725	protein_coding	FLOT1
ENSSSCT00000031244	ENSSSCG00000023529	protein_coding	--
ENSSSCT00000031246	ENSSSCG00000029916	protein_coding	--
ENSSSCT00000009864	ENSSSCG00000009007	protein_coding	--
ENSSSCT00000032536	ENSSSCG00000022737	protein_coding	--
ENSSSCT00000027688	ENSSSCG00000026760	protein_coding	GZMM
ENSSSCT00000009861	ENSSSCG00000009004	protein_coding	SFRP2
ENSSSCT00000035155	ENSSSCG00000017416	protein_coding	DHX58
ENSSSCT00000007788	ENSSSCG00000007116	protein_coding	CD93
ENSSSCT00000023503	ENSSSCG00000024933	protein_coding	SLC36A4
ENSSSCT00000030447	ENSSSCG00000023324	protein_coding	--
ENSSSCT00000010489	ENSSSCG00000009568	protein_coding	ZMYM5
ENSSSCT00000002323	ENSSSCG00000023252	protein_coding	--
ENSSSCT00000005202	ENSSSCG00000004710	protein_coding	ADAL
ENSSSCT00000002253	ENSSSCG00000002014	protein_coding	JPH4
ENSSSCT00000033934	ENSSSCG00000030857	protein_coding	LENG8
ENSSSCT00000002524	ENSSSCG00000002266	protein_coding	CHD2
ENSSSCT00000006416	ENSSSCG00000005837	protein_coding	FAM69B
ENSSSCT00000006417	ENSSSCG00000005838	protein_coding	TRAF2
ENSSSCT00000012233	ENSSSCG00000011171	protein_coding	--
ENSSSCT00000028428	ENSSSCG00000026668	protein_coding	HIST1H2BC
ENSSSCT00000012093	ENSSSCG00000011049	protein_coding	DCLRE1C
ENSSSCT00000024403	ENSSSCG00000024960	protein_coding	PDGFC
ENSSSCT00000030703	ENSSSCG00000023118	protein_coding	BZW2
ENSSSCT00000022957	ENSSSCG00000023913	protein_coding	--
ENSSSCT00000005808	ENSSSCG00000005273	protein_coding	OSTF1
ENSSSCT00000005802	ENSSSCG00000005267	protein_coding	ANXA1
ENSSSCT00000028519	ENSSSCG00000026770	protein_coding	--
ENSSSCT00000028512	ENSSSCG00000024746	protein_coding	--
ENSSSCT00000028510	ENSSSCG00000026757	protein_coding	--
ENSSSCT00000012523	ENSSSCG00000011443	protein_coding	STAB1
ENSSSCT00000031091	ENSSSCG00000023019	protein_coding	--
ENSSSCT00000027995	ENSSSCG00000023418	protein_coding	--
ENSSSCT00000016640	ENSSSCG00000015271	protein_coding	PRELP
ENSSSCT00000029358	ENSSSCG00000025115	protein_coding	--
ENSSSCT00000028908	ENSSSCG00000029166	protein_coding	--
ENSSSCT00000010968	ENSSSCG00000010011	protein_coding	--
ENSSSCT00000025866	ENSSSCG00000020663	protein_coding	--
ENSSSCT00000002936	ENSSSCG00000002646	protein_coding	TRAPPC2L
ENSSSCT00000018774	ENSSSCG00000017245	protein_coding	CDC42EP4
ENSSSCT00000008785	ENSSSCG00000008017	protein_coding	NME3
ENSSSCT00000008782	ENSSSCG00000008014	protein_coding	NUBP2
ENSSSCT00000029774	ENSSSCG00000027396	protein_coding	--
ENSSSCT00000011768	ENSSSCG00000010756	protein_coding	MGMT
ENSSSCT00000011287	ENSSSCG00000010312	protein_coding	PLAU
ENSSSCT00000024536	ENSSSCG00000026186	protein_coding	--
ENSSSCT00000024532	ENSSSCG00000026771	protein_coding	ALKBH5
ENSSSCT00000022487	ENSSSCG00000025270	protein_coding	CHRD
ENSSSCT00000008302	ENSSSCG00000007568	protein_coding	IQCE
ENSSSCT00000022484	ENSSSCG00000029268	protein_coding	--
ENSSSCT00000015476	ENSSSCG00000014167	protein_coding	-
ENSSSCT00000008308	ENSSSCG00000007572	protein_coding	LFNG
ENSSSCT00000008658	ENSSSCG00000027756	protein_coding	--
ENSSSCT00000033394	ENSSSCG00000005934	protein_coding	TRAPPC9
ENSSSCT00000033397	ENSSSCG00000007334	protein_coding	SRC
ENSSSCT00000018170	ENSSSCG00000016689	protein_coding	TRIL
ENSSSCT00000018171	ENSSSCG00000016690	protein_coding	--
ENSSSCT00000010491	ENSSSCG00000009570	protein_coding	MPHOSPH8
ENSSSCT00000007955	ENSSSCG00000007270	protein_coding	--
ENSSSCT00000022809	ENSSSCG00000020909	protein_coding	--
ENSSSCT00000010565	ENSSSCG00000009637	protein_coding	--
ENSSSCT00000016260	ENSSSCG00000014905	protein_coding	TMEM126B
ENSSSCT00000016263	ENSSSCG00000014907	protein_coding	CREBZF
ENSSSCT00000010367	ENSSSCG00000009457	protein_coding	--
ENSSSCT00000010812	ENSSSCG00000009864	protein_coding	--
ENSSSCT00000019285	ENSSSCG00000017718	protein_coding	--
ENSSSCT00000013728	ENSSSCG00000012556	protein_coding	RBM41
ENSSSCT00000022668	ENSSSCG00000021750	protein_coding	MEX3D
ENSSSCT00000018550	ENSSSCG00000017037	protein_coding	FABP6
ENSSSCT00000004030	ENSSSCG00000003634	protein_coding	ADPRHL2
ENSSSCT00000022666	ENSSSCG00000030240	protein_coding	--
ENSSSCT00000010381	ENSSSCG00000009468	protein_coding	KCTD12
ENSSSCT00000018399	ENSSSCG00000016894	protein_coding	ARL15
ENSSSCT00000018484	ENSSSCG00000016974	protein_coding	MAP1B
ENSSSCT00000031506	ENSSSCG00000024550	protein_coding	UQCR10
ENSSSCT00000008014	ENSSSCG00000007324	protein_coding	SOGA1
ENSSSCT00000033248	ENSSSCG00000013888	protein_coding	JAK3
ENSSSCT00000026504	ENSSSCG00000021410	protein_coding	STRAP
ENSSSCT00000000021	ENSSSCG00000000020	protein_coding	PHF21B
ENSSSCT00000000020	ENSSSCG00000000019	protein_coding	--
ENSSSCT00000025669	ENSSSCG00000023205	protein_coding	--
ENSSSCT00000000026	ENSSSCG00000000025	protein_coding	PARVG
ENSSSCT00000015603	ENSSSCG00000014280	protein_coding	RAD50
ENSSSCT00000004787	ENSSSCG00000004331	protein_coding	CH242-196P17.1
ENSSSCT00000017936	ENSSSCG00000016472	protein_coding	KEL
ENSSSCT00000017283	ENSSSCG00000015872	protein_coding	GPD2
ENSSSCT00000017282	ENSSSCG00000015871	protein_coding	NR4A2
ENSSSCT00000007071	ENSSSCG00000006455	protein_coding	CD5L
ENSSSCT00000032285	ENSSSCG00000021080	protein_coding	--
ENSSSCT00000014704	ENSSSCG00000013460	protein_coding	OAZ1
ENSSSCT00000005147	ENSSSCG00000004661	protein_coding	MYEF2
ENSSSCT00000009493	ENSSSCG00000008676	protein_coding	-
ENSSSCT00000016886	ENSSSCG00000015499	protein_coding	--
ENSSSCT00000026819	ENSSSCG00000025956	protein_coding	--
ENSSSCT00000009651	ENSSSCG00000008821	protein_coding	SLAIN2
ENSSSCT00000006173	ENSSSCG00000005614	protein_coding	FAM129B
ENSSSCT00000026811	ENSSSCG00000020757	protein_coding	--
ENSSSCT00000026766	ENSSSCG00000030514	protein_coding	--
ENSSSCT00000026767	ENSSSCG00000024115	protein_coding	--
ENSSSCT00000009010	ENSSSCG00000008228	protein_coding	GNLY
ENSSSCT00000001265	ENSSSCG00000024918	protein_coding	--
ENSSSCT00000009019	ENSSSCG00000008236	protein_coding	--
ENSSSCT00000001267	ENSSSCG00000030071	protein_coding	--
ENSSSCT00000001263	ENSSSCG00000025957	protein_coding	HIST1H2BH
ENSSSCT00000030637	ENSSSCG00000028529	protein_coding	--
ENSSSCT00000012899	ENSSSCG00000011787	protein_coding	MAGEF1
ENSSSCT00000012427	ENSSSCG00000011350	protein_coding	CCDC51
ENSSSCT00000014641	ENSSSCG00000013401	protein_coding	DKK3
ENSSSCT00000031875	ENSSSCG00000027248	protein_coding	--
ENSSSCT00000013047	ENSSSCG00000011923	protein_coding	NEPRO
ENSSSCT00000030870	ENSSSCG00000021188	protein_coding	--
ENSSSCT00000030873	ENSSSCG00000028879	protein_coding	PLOD3
ENSSSCT00000009277	ENSSSCG00000008475	protein_coding	--
ENSSSCT00000013042	ENSSSCG00000011918	protein_coding	USF3
ENSSSCT00000002799	ENSSSCG00000002520	protein_coding	SLC25A29
ENSSSCT00000026104	ENSSSCG00000026393	protein_coding	MRPS15
ENSSSCT00000010896	ENSSSCG00000009944	protein_coding	--
ENSSSCT00000014806	ENSSSCG00000013556	protein_coding	ADGRE1
ENSSSCT00000014804	ENSSSCG00000013554	protein_coding	--
ENSSSCT00000035578	ENSSSCG00000003410	protein_coding	CH242-449E16.1
ENSSSCT00000014802	ENSSSCG00000013552	protein_coding	--
ENSSSCT00000014800	ENSSSCG00000013551	protein_coding	C3
ENSSSCT00000002060	ENSSSCG00000001838	protein_coding	POLG
ENSSSCT00000013133	ENSSSCG00000012002	protein_coding	--
ENSSSCT00000027748	ENSSSCG00000023619	protein_coding	SLC12A9
ENSSSCT00000023226	ENSSSCG00000021586	protein_coding	ZHX2
ENSSSCT00000002086	ENSSSCG00000001861	protein_coding	--
ENSSSCT00000023629	ENSSSCG00000025850	protein_coding	--
ENSSSCT00000027367	ENSSSCG00000026957	protein_coding	RNASE6
ENSSSCT00000001683	ENSSSCG00000001510	protein_coding	--
ENSSSCT00000009871	ENSSSCG00000009012	protein_coding	TMEM154
ENSSSCT00000023536	ENSSSCG00000024136	protein_coding	AMPH
ENSSSCT00000023537	ENSSSCG00000029251	protein_coding	--
ENSSSCT00000030908	ENSSSCG00000029782	protein_coding	CELA1
ENSSSCT00000024984	ENSSSCG00000023198	protein_coding	--
ENSSSCT00000024323	ENSSSCG00000023016	protein_coding	--
ENSSSCT00000024325	ENSSSCG00000025371	protein_coding	--
ENSSSCT00000032386	ENSSSCG00000024071	protein_coding	SCARF1
ENSSSCT00000003338	ENSSSCG00000003005	protein_coding	--
ENSSSCT00000033901	ENSSSCG00000024813	protein_coding	MAP3K3
ENSSSCT00000002240	ENSSSCG00000002002	protein_coding	IRF9
ENSSSCT00000003330	ENSSSCG00000002998	protein_coding	SNRPA
ENSSSCT00000002248	ENSSSCG00000002009	protein_coding	PCK2
ENSSSCT00000011817	ENSSSCG00000010801	protein_coding	--
ENSSSCT00000007139	ENSSSCG00000006519	protein_coding	CLK2
ENSSSCT00000017635	ENSSSCG00000016194	protein_coding	USP37
ENSSSCT00000028182	ENSSSCG00000026959	protein_coding	NPAT
ENSSSCT00000025452	ENSSSCG00000010329	protein_coding	--
ENSSSCT00000012839	ENSSSCG00000011729	protein_coding	--
ENSSSCT00000024434	ENSSSCG00000027722	protein_coding	--
ENSSSCT00000024435	ENSSSCG00000026593	protein_coding	--
ENSSSCT00000003114	ENSSSCG00000002814	protein_coding	ADGRG3
ENSSSCT00000008828	ENSSSCG00000008056	protein_coding	ATP6V0C
ENSSSCT00000013984	ENSSSCG00000012792	protein_coding	RENBP
ENSSSCT00000005817	ENSSSCG00000005282	protein_coding	VPS13A
ENSSSCT00000024186	ENSSSCG00000020658	protein_coding	--
ENSSSCT00000005813	ENSSSCG00000005278	protein_coding	PRUNE2
ENSSSCT00000028568	ENSSSCG00000029058	protein_coding	C14H10orf116
ENSSSCT00000012397	ENSSSCG00000011322	protein_coding	CCR1
ENSSSCT00000018836	ENSSSCG00000017300	protein_coding	MRC2
ENSSSCT00000011979	ENSSSCG00000010944	protein_coding	FBP1
ENSSSCT00000006548	ENSSSCG00000005965	protein_coding	MYC
ENSSSCT00000011607	ENSSSCG00000022351	protein_coding	GSTO1
ENSSSCT00000000791	ENSSSCG00000000728	protein_coding	PARP11
ENSSSCT00000000797	ENSSSCG00000000734	protein_coding	--
ENSSSCT00000011601	ENSSSCG00000010605	protein_coding	OBFC1
ENSSSCT00000016383	ENSSSCG00000015019	protein_coding	COLCA2
ENSSSCT00000024056	ENSSSCG00000023875	protein_coding	--
ENSSSCT00000024505	ENSSSCG00000026459	protein_coding	--
ENSSSCT00000007549	ENSSSCG00000006894	protein_coding	FNBP1L
ENSSSCT00000030601	ENSSSCG00000028299	protein_coding	--
ENSSSCT00000007547	ENSSSCG00000006892	protein_coding	DNTTIP2
ENSSSCT00000007546	ENSSSCG00000006891	protein_coding	GCLM
ENSSSCT00000025056	ENSSSCG00000026887	protein_coding	--
ENSSSCT00000008223	ENSSSCG00000007508	protein_coding	ZBP1
ENSSSCT00000014249	ENSSSCG00000013036	protein_coding	FKBP2
ENSSSCT00000014241	ENSSSCG00000013028	protein_coding	ESRRA
ENSSSCT00000014243	ENSSSCG00000013030	protein_coding	PRDX5
ENSSSCT00000025875	ENSSSCG00000025857	protein_coding	--
ENSSSCT00000019367	ENSSSCG00000017795	protein_coding	NSRP1
ENSSSCT00000029761	ENSSSCG00000021006	protein_coding	--
ENSSSCT00000029764	ENSSSCG00000027982	protein_coding	ISG15
ENSSSCT00000027352	ENSSSCG00000023738	protein_coding	--
ENSSSCT00000015569	ENSSSCG00000014249	protein_coding	MARCH3
ENSSSCT00000008640	ENSSSCG00000007885	protein_coding	--
ENSSSCT00000022279	ENSSSCG00000025229	protein_coding	--
ENSSSCT00000018166	ENSSSCG00000016685	protein_coding	WIPF3
ENSSSCT00000034585	ENSSSCG00000027665	protein_coding	SIRPB1
ENSSSCT00000018163	ENSSSCG00000016682	protein_coding	PLEKHA8
ENSSSCT00000011151	ENSSSCG00000010185	protein_coding	GALNT2
ENSSSCT00000027425	ENSSSCG00000011743	protein_coding	MECOM
ENSSSCT00000022274	ENSSSCG00000022996	protein_coding	PAGR1
ENSSSCT00000013608	ENSSSCG00000012443	protein_coding	CYSLTR1
ENSSSCT00000008791	ENSSSCG00000008022	protein_coding	TELO2
ENSSSCT00000018767	ENSSSCG00000017238	protein_coding	TTYH2
ENSSSCT00000018765	ENSSSCG00000017236	protein_coding	CD300C
ENSSSCT00000010550	ENSSSCG00000009624	protein_coding	--
ENSSSCT00000010553	ENSSSCG00000009627	protein_coding	--
ENSSSCT00000016277	ENSSSCG00000014921	protein_coding	PRSS23
ENSSSCT00000016273	ENSSSCG00000014917	protein_coding	CCDC81
ENSSSCT00000024612	ENSSSCG00000030402	protein_coding	--
ENSSSCT00000004369	ENSSSCG00000003950	protein_coding	TIE1
ENSSSCT00000008924	ENSSSCG00000008147	protein_coding	FHL2
ENSSSCT00000030116	ENSSSCG00000026753	protein_coding	--
ENSSSCT00000014022	ENSSSCG00000012828	protein_coding	--
ENSSSCT00000018548	ENSSSCG00000017035	protein_coding	C1QTNF2
ENSSSCT00000019017	ENSSSCG00000017468	protein_coding	--
ENSSSCT00000004023	ENSSSCG00000003627	protein_coding	ZMYM4
ENSSSCT00000004022	ENSSSCG00000003626	protein_coding	--
ENSSSCT00000017996	ENSSSCG00000016528	protein_coding	--
ENSSSCT00000033054	ENSSSCG00000030857	protein_coding	LENG8
ENSSSCT00000018386	ENSSSCG00000016882	protein_coding	PARP8
ENSSSCT00000018491	ENSSSCG00000016981	protein_coding	CPEB4
ENSSSCT00000000011	ENSSSCG00000000010	protein_coding	--
ENSSSCT00000022580	ENSSSCG00000030042	protein_coding	SBNO2
ENSSSCT00000015670	ENSSSCG00000024189	protein_coding	--
ENSSSCT00000004793	ENSSSCG00000004337	protein_coding	MANEA
ENSSSCT00000010042	ENSSSCG00000009170	protein_coding	--
ENSSSCT00000010043	ENSSSCG00000009171	protein_coding	--
ENSSSCT00000010041	ENSSSCG00000009169	protein_coding	SLC39A8
ENSSSCT00000030337	ENSSSCG00000028331	protein_coding	IL1R2
ENSSSCT00000022292	ENSSSCG00000024801	protein_coding	--
ENSSSCT00000033340	ENSSSCG00000015294	protein_coding	CR1
ENSSSCT00000022296	ENSSSCG00000025644	protein_coding	CD1A
ENSSSCT00000003699	ENSSSCG00000003332	protein_coding	SDF4
ENSSSCT00000004486	ENSSSCG00000004057	protein_coding	SYTL3
ENSSSCT00000005170	ENSSSCG00000004682	protein_coding	B2M
ENSSSCT00000009461	ENSSSCG00000008648	protein_coding	RSAD2
ENSSSCT00000016185	ENSSSCG00000014833	protein_coding	UCP2
ENSSSCT00000006142	ENSSSCG00000005587	protein_coding	NEK6
ENSSSCT00000000875	ENSSSCG00000000806	protein_coding	SCAF11
ENSSSCT00000026775	ENSSSCG00000030408	protein_coding	DDX58
ENSSSCT00000000870	ENSSSCG00000000802	protein_coding	NELL2
ENSSSCT00000014719	ENSSSCG00000013474	protein_coding	S1PR4
ENSSSCT00000001271	ENSSSCG00000023360	protein_coding	--
ENSSSCT00000013554	ENSSSCG00000012396	protein_coding	MED12
ENSSSCT00000001275	ENSSSCG00000001177	protein_coding	--
ENSSSCT00000005777	ENSSSCG00000005243	protein_coding	PGM5
ENSSSCT00000023185	ENSSSCG00000022875	protein_coding	--
ENSSSCT00000007307	ENSSSCG00000006669	protein_coding	--
ENSSSCT00000026974	ENSSSCG00000026710	protein_coding	CARHSP1
ENSSSCT00000029292	ENSSSCG00000029825	protein_coding	--
ENSSSCT00000023057	ENSSSCG00000023562	protein_coding	SNRPE
ENSSSCT00000026571	ENSSSCG00000028731	protein_coding	CXCL13
ENSSSCT00000004575	ENSSSCG00000004140	protein_coding	VTA1
ENSSSCT00000004573	ENSSSCG00000004138	protein_coding	HIVEP2
ENSSSCT00000017254	ENSSSCG00000015846	protein_coding	RBPMS
ENSSSCT00000009511	ENSSSCG00000008693	protein_coding	NOP14
ENSSSCT00000006326	ENSSSCG00000005752	protein_coding	PAEP
ENSSSCT00000017138	ENSSSCG00000015738	protein_coding	--
ENSSSCT00000017137	ENSSSCG00000015737	protein_coding	--
ENSSSCT00000017135	ENSSSCG00000015735	protein_coding	PTPN18
ENSSSCT00000027635	ENSSSCG00000026404	protein_coding	SERTAD4
ENSSSCT00000023237	ENSSSCG00000026833	protein_coding	MSANTD4
ENSSSCT00000023234	ENSSSCG00000030680	protein_coding	TCF7
ENSSSCT00000027733	ENSSSCG00000022710	protein_coding	--
ENSSSCT00000030598	ENSSSCG00000026876	protein_coding	ABHD12
ENSSSCT00000001693	ENSSSCG00000001520	protein_coding	LEMD2
ENSSSCT00000027357	ENSSSCG00000023992	protein_coding	--
ENSSSCT00000028625	ENSSSCG00000029956	protein_coding	--
ENSSSCT00000028994	ENSSSCG00000022641	protein_coding	--
ENSSSCT00000028699	ENSSSCG00000021433	protein_coding	--
ENSSSCT00000006162	ENSSSCG00000005604	protein_coding	PBX3
ENSSSCT00000016718	ENSSSCG00000015345	protein_coding	GLCCI1
ENSSSCT00000003692	ENSSSCG00000003326	protein_coding	PEG3
ENSSSCT00000017621	ENSSSCG00000016183	protein_coding	--
ENSSSCT00000017629	ENSSSCG00000016189	protein_coding	--
ENSSSCT00000031817	ENSSSCG00000022703	protein_coding	--
ENSSSCT00000027646	ENSSSCG00000025445	protein_coding	--
ENSSSCT00000018284	ENSSSCG00000016795	protein_coding	--
ENSSSCT00000027648	ENSSSCG00000026074	protein_coding	--
ENSSSCT00000013096	ENSSSCG00000011968	protein_coding	NIT2
ENSSSCT00000028750	ENSSSCG00000027225	protein_coding	--
ENSSSCT00000028752	ENSSSCG00000026819	protein_coding	--
ENSSSCT00000026082	ENSSSCG00000025528	protein_coding	--
ENSSSCT00000003327	ENSSSCG00000002995	protein_coding	--
ENSSSCT00000011807	ENSSSCG00000010791	protein_coding	--
ENSSSCT00000011806	ENSSSCG00000010790	protein_coding	ECHS1
ENSSSCT00000006554	ENSSSCG00000005971	protein_coding	ZNF572
ENSSSCT00000012310	ENSSSCG00000011243	protein_coding	GOLGA4
ENSSSCT00000028175	ENSSSCG00000024862	protein_coding	FGF11
ENSSSCT00000024426	ENSSSCG00000009967	protein_coding	PITPNB
ENSSSCT00000024429	ENSSSCG00000022730	protein_coding	--
ENSSSCT00000029485	ENSSSCG00000029333	protein_coding	RASD1
ENSSSCT00000029578	ENSSSCG00000030632	protein_coding	UBE2V1
ENSSSCT00000003212	ENSSSCG00000002907	protein_coding	--
ENSSSCT00000003746	ENSSSCG00000003376	protein_coding	PLEKHG5
ENSSSCT00000028574	ENSSSCG00000028726	protein_coding	--
ENSSSCT00000028571	ENSSSCG00000027757	protein_coding	FIS1
ENSSSCT00000017147	ENSSSCG00000015747	protein_coding	--
ENSSSCT00000029379	ENSSSCG00000026830	protein_coding	--
ENSSSCT00000017714	ENSSSCG00000016267	protein_coding	ITM2C
ENSSSCT00000017711	ENSSSCG00000016265	protein_coding	--
ENSSSCT00000012317	ENSSSCG00000011250	protein_coding	--
ENSSSCT00000024041	ENSSSCG00000025911	protein_coding	--
ENSSSCT00000000271	ENSSSCG00000000252	protein_coding	KRT8
ENSSSCT00000000272	ENSSSCG00000000253	protein_coding	KRT18
ENSSSCT00000025068	ENSSSCG00000022783	protein_coding	DCUN1D1
ENSSSCT00000030610	ENSSSCG00000028788	protein_coding	BORCS6
ENSSSCT00000024511	ENSSSCG00000021730	protein_coding	--
ENSSSCT00000012769	ENSSSCG00000011664	protein_coding	RBP1
ENSSSCT00000029397	ENSSSCG00000025918	protein_coding	--
ENSSSCT00000025808	ENSSSCG00000028746	protein_coding	--
ENSSSCT00000028374	ENSSSCG00000026610	protein_coding	--
ENSSSCT00000028373	ENSSSCG00000030010	protein_coding	RPL36
ENSSSCT00000031188	ENSSSCG00000029113	protein_coding	RNF219
ENSSSCT00000012163	ENSSSCG00000011114	protein_coding	--
ENSSSCT00000029712	ENSSSCG00000027793	protein_coding	PGS1
ENSSSCT00000012166	ENSSSCG00000011117	protein_coding	--
ENSSSCT00000011708	ENSSSCG00000010702	protein_coding	PLEKHA1
ENSSSCT00000011709	ENSSSCG00000010703	protein_coding	HTRA1
ENSSSCT00000007447	ENSSSCG00000006799	protein_coding	LRIF1
ENSSSCT00000010831	ENSSSCG00000009881	protein_coding	OAS2
ENSSSCT00000016333	ENSSSCG00000014971	protein_coding	--
ENSSSCT00000015492	ENSSSCG00000014180	protein_coding	ST8SIA4
ENSSSCT00000022463	ENSSSCG00000029900	protein_coding	DMPK
ENSSSCT00000010838	ENSSSCG00000009888	protein_coding	ERP29
ENSSSCT00000033134	ENSSSCG00000001867	protein_coding	PSTPIP1
ENSSSCT00000000310	ENSSSCG00000000289	protein_coding	NFE2
ENSSSCT00000025244	ENSSSCG00000021890	protein_coding	GNB2
ENSSSCT00000029021	ENSSSCG00000028780	protein_coding	--
ENSSSCT00000011126	ENSSSCG00000010161	protein_coding	COA6
ENSSSCT00000018151	ENSSSCG00000016672	protein_coding	ADCYAP1R1
ENSSSCT00000022264	ENSSSCG00000020894	protein_coding	--
ENSSSCT00000001493	ENSSSCG00000001372	protein_coding	GNL1
ENSSSCT00000031698	ENSSSCG00000027060	protein_coding	TBX2
ENSSSCT00000011015	ENSSSCG00000010054	protein_coding	ADORA2A
ENSSSCT00000007682	ENSSSCG00000007019	protein_coding	GPAT4
ENSSSCT00000010546	ENSSSCG00000009620	protein_coding	BMP1
ENSSSCT00000024601	ENSSSCG00000028978	protein_coding	CAD
ENSSSCT00000030105	ENSSSCG00000027663	protein_coding	--
ENSSSCT00000030107	ENSSSCG00000029057	protein_coding	--
ENSSSCT00000014037	ENSSSCG00000012842	protein_coding	--
ENSSSCT00000032358	ENSSSCG00000030491	protein_coding	ZNF830
ENSSSCT00000032359	ENSSSCG00000026083	protein_coding	DNAJC24
ENSSSCT00000014033	ENSSSCG00000012838	protein_coding	TSPAN4
ENSSSCT00000000006	ENSSSCG00000000005	protein_coding	--
ENSSSCT00000018538	ENSSSCG00000017026	protein_coding	--
ENSSSCT00000004011	ENSSSCG00000003616	protein_coding	FAM167B
ENSSSCT00000032354	ENSSSCG00000025858	protein_coding	--
ENSSSCT00000011516	ENSSSCG00000010526	protein_coding	AVPI1
ENSSSCT00000013802	ENSSSCG00000012623	protein_coding	SLC25A6
ENSSSCT00000032192	ENSSSCG00000025611	protein_coding	--
ENSSSCT00000025113	ENSSSCG00000022078	protein_coding	--
ENSSSCT00000031520	ENSSSCG00000021407	protein_coding	--
ENSSSCT00000032548	ENSSSCG00000024938	protein_coding	SH3BP5
ENSSSCT00000015340	ENSSSCG00000014043	protein_coding	RAB24
ENSSSCT00000028270	ENSSSCG00000026326	protein_coding	CCNF
ENSSSCT00000005513	ENSSSCG00000004998	protein_coding	--
ENSSSCT00000013411	ENSSSCG00000012264	protein_coding	ZNF674
ENSSSCT00000003953	ENSSSCG00000003559	protein_coding	--
ENSSSCT00000015660	ENSSSCG00000014336	protein_coding	EGR1
ENSSSCT00000001011	ENSSSCG00000000926	protein_coding	CEP290
ENSSSCT00000028470	ENSSSCG00000028567	protein_coding	BTNL9
ENSSSCT00000009542	ENSSSCG00000008722	protein_coding	--
ENSSSCT00000010051	ENSSSCG00000009178	protein_coding	--
ENSSSCT00000015349	ENSSSCG00000014051	protein_coding	TSPAN17
ENSSSCT00000025622	ENSSSCG00000025196	protein_coding	--
ENSSSCT00000033351	ENSSSCG00000009623	protein_coding	SLC39A14
ENSSSCT00000022280	ENSSSCG00000030323	protein_coding	--
ENSSSCT00000008101	ENSSSCG00000007401	protein_coding	SDC4
ENSSSCT00000003667	ENSSSCG00000003303	protein_coding	--
ENSSSCT00000004165	ENSSSCG00000003763	protein_coding	--
ENSSSCT00000014720	ENSSSCG00000013475	protein_coding	NCLN
ENSSSCT00000014724	ENSSSCG00000013478	protein_coding	DOHH
ENSSSCT00000016863	ENSSSCG00000015480	protein_coding	PRRC2C
ENSSSCT00000016860	ENSSSCG00000015477	protein_coding	CHIT1
ENSSSCT00000029868	ENSSSCG00000029050	protein_coding	-
ENSSSCT00000017392	ENSSSCG00000015973	protein_coding	ATP5G3
ENSSSCT00000017391	ENSSSCG00000015972	protein_coding	--
ENSSSCT00000026748	ENSSSCG00000027601	protein_coding	FAM180A
ENSSSCT00000006159	ENSSSCG00000005601	protein_coding	HSPA5
ENSSSCT00000026297	ENSSSCG00000021503	protein_coding	BCHE
ENSSSCT00000026747	ENSSSCG00000021579	protein_coding	--
ENSSSCT00000026292	ENSSSCG00000022236	protein_coding	--
ENSSSCT00000029770	ENSSSCG00000025423	protein_coding	KCNK5
ENSSSCT00000015710	ENSSSCG00000014380	protein_coding	--
ENSSSCT00000026345	ENSSSCG00000022843	protein_coding	--
ENSSSCT00000032617	ENSSSCG00000012144	protein_coding	GRPR
ENSSSCT00000030851	ENSSSCG00000029983	protein_coding	PCGF3
ENSSSCT00000026905	ENSSSCG00000026585	protein_coding	PROCR
ENSSSCT00000000917	ENSSSCG00000000843	protein_coding	TXNRD1
ENSSSCT00000015968	ENSSSCG00000014618	protein_coding	--
ENSSSCT00000030858	ENSSSCG00000030685	protein_coding	ARID2
ENSSSCT00000023481	ENSSSCG00000029846	protein_coding	--
ENSSSCT00000031984	ENSSSCG00000030095	protein_coding	ZBTB16
ENSSSCT00000017497	ENSSSCG00000016071	protein_coding	--
ENSSSCT00000004742	ENSSSCG00000004289	protein_coding	CEP162
ENSSSCT00000005694	ENSSSCG00000005166	protein_coding	MLLT3
ENSSSCT00000027506	ENSSSCG00000025485	protein_coding	C1orf162
ENSSSCT00000017244	ENSSSCG00000015836	protein_coding	HNRNPA2B1
ENSSSCT00000004582	ENSSSCG00000004146	protein_coding	REPS1
ENSSSCT00000033589	ENSSSCG00000011946	protein_coding	ALCAM
ENSSSCT00000002649	ENSSSCG00000002382	protein_coding	TMED10
ENSSSCT00000014824	ENSSSCG00000013572	protein_coding	PNPLA6
ENSSSCT00000014825	ENSSSCG00000013573	protein_coding	TRAPPC5
ENSSSCT00000019179	ENSSSCG00000017617	protein_coding	SCPEP1
ENSSSCT00000032501	ENSSSCG00000029893	protein_coding	--
ENSSSCT00000013151	ENSSSCG00000012020	protein_coding	--
ENSSSCT00000009850	ENSSSCG00000008993	protein_coding	NPY2R
ENSSSCT00000023732	ENSSSCG00000028220	protein_coding	--
ENSSSCT00000016919	ENSSSCG00000015531	protein_coding	--
ENSSSCT00000007200	ENSSSCG00000006572	protein_coding	NPR1
ENSSSCT00000006887	ENSSSCG00000006286	protein_coding	SELE
ENSSSCT00000001070	ENSSSCG00000000980	protein_coding	ALG12
ENSSSCT00000001732	ENSSSCG00000001554	protein_coding	SRPK1
ENSSSCT00000011493	ENSSSCG00000010504	protein_coding	BLNK
ENSSSCT00000026121	ENSSSCG00000023080	protein_coding	TPP1
ENSSSCT00000005183	ENSSSCG00000004693	protein_coding	--
ENSSSCT00000005185	ENSSSCG00000004695	protein_coding	WDR76
ENSSSCT00000027349	ENSSSCG00000023929	protein_coding	TXNRD3
ENSSSCT00000005189	ENSSSCG00000004699	protein_coding	ELL3
ENSSSCT00000026129	ENSSSCG00000028430	protein_coding	--
ENSSSCT00000033698	ENSSSCG00000008675	protein_coding	LETM1
ENSSSCT00000028969	ENSSSCG00000026852	protein_coding	NPPC
ENSSSCT00000003915	ENSSSCG00000003524	protein_coding	C1QA
ENSSSCT00000003916	ENSSSCG00000003525	protein_coding	C1QC
ENSSSCT00000003917	ENSSSCG00000003526	protein_coding	C1QB
ENSSSCT00000023888	ENSSSCG00000025993	protein_coding	SGPP2
ENSSSCT00000009792	ENSSSCG00000008939	protein_coding	JCHAIN
ENSSSCT00000007118	ENSSSCG00000006499	protein_coding	LAMTOR2
ENSSSCT00000000642	ENSSSCG00000000597	protein_coding	LMO3
ENSSSCT00000000647	ENSSSCG00000000602	protein_coding	RERG
ENSSSCT00000005986	ENSSSCG00000005442	protein_coding	--
ENSSSCT00000024859	ENSSSCG00000028047	protein_coding	--
ENSSSCT00000003594	ENSSSCG00000003235	protein_coding	CTU1
ENSSSCT00000003595	ENSSSCG00000003236	protein_coding	SIGLEC5
ENSSSCT00000024852	ENSSSCG00000028784	protein_coding	C7H6orf12
ENSSSCT00000033967	ENSSSCG00000029231	protein_coding	PigE-108A11.6
ENSSSCT00000002517	ENSSSCG00000002260	protein_coding	--
ENSSSCT00000026549	ENSSSCG00000029161	protein_coding	ADI1
ENSSSCT00000031323	ENSSSCG00000027565	protein_coding	ARHGAP45
ENSSSCT00000017092	ENSSSCG00000015692	protein_coding	--
ENSSSCT00000017097	ENSSSCG00000015697	protein_coding	CCNT2
ENSSSCT00000006424	ENSSSCG00000005845	protein_coding	TOR4A
ENSSSCT00000016670	ENSSSCG00000015299	protein_coding	STEAP4
ENSSSCT00000024296	ENSSSCG00000028571	protein_coding	FAM207A
ENSSSCT00000031665	ENSSSCG00000026402	protein_coding	--
ENSSSCT00000031661	ENSSSCG00000027859	protein_coding	--
ENSSSCT00000031660	ENSSSCG00000021379	protein_coding	C1QTNF1
ENSSSCT00000015061	ENSSSCG00000013784	protein_coding	--
ENSSSCT00000017060	ENSSSCG00000015662	protein_coding	C4BPA
ENSSSCT00000012289	ENSSSCG00000011222	protein_coding	--
ENSSSCT00000012286	ENSSSCG00000011219	protein_coding	--
ENSSSCT00000003774	ENSSSCG00000003402	protein_coding	PGD
ENSSSCT00000012370	ENSSSCG00000011299	protein_coding	CLEC3B
ENSSSCT00000029567	ENSSSCG00000021419	protein_coding	--
ENSSSCT00000028540	ENSSSCG00000023735	protein_coding	--
ENSSSCT00000029818	ENSSSCG00000023112	protein_coding	PDS5A
ENSSSCT00000028542	ENSSSCG00000023966	protein_coding	--
ENSSSCT00000028545	ENSSSCG00000027223	protein_coding	THAP1
ENSSSCT00000023954	ENSSSCG00000023263	protein_coding	--
ENSSSCT00000018190	ENSSSCG00000016709	protein_coding	SNX10
ENSSSCT00000029365	ENSSSCG00000023212	protein_coding	PPP1R14A
ENSSSCT00000031067	ENSSSCG00000029691	protein_coding	CORO1A
ENSSSCT00000030629	ENSSSCG00000023433	protein_coding	GNA12
ENSSSCT00000008483	ENSSSCG00000007738	protein_coding	ASL
ENSSSCT00000008482	ENSSSCG00000007737	protein_coding	TPST1
ENSSSCT00000016432	ENSSSCG00000015066	protein_coding	ZPR1
ENSSSCT00000008480	ENSSSCG00000007735	protein_coding	RABGEF1
ENSSSCT00000019495	ENSSSCG00000017913	protein_coding	PSMB6
ENSSSCT00000030627	ENSSSCG00000029976	protein_coding	--
ENSSSCT00000012592	ENSSSCG00000011506	protein_coding	UBA3
ENSSSCT00000015394	ENSSSCG00000014093	protein_coding	CRHBP
ENSSSCT00000029383	ENSSSCG00000026877	protein_coding	C12orf57
ENSSSCT00000003001	ENSSSCG00000002707	protein_coding	GABARAPL2
ENSSSCT00000012118	ENSSSCG00000011074	protein_coding	ARHGAP21
ENSSSCT00000008804	ENSSSCG00000008035	protein_coding	GFER
ENSSSCT00000014740	ENSSSCG00000013494	protein_coding	MATK
ENSSSCT00000002158	ENSSSCG00000001929	protein_coding	PARP6
ENSSSCT00000011711	ENSSSCG00000010705	protein_coding	GMFG
ENSSSCT00000006634	ENSSSCG00000006045	protein_coding	--
ENSSSCT00000007450	ENSSSCG00000006802	protein_coding	KCNA3
ENSSSCT00000010840	ENSSSCG00000009890	protein_coding	MAPKAPK5
ENSSSCT00000015483	ENSSSCG00000014171	protein_coding	ERAP1
ENSSSCT00000015484	ENSSSCG00000014172	protein_coding	--
ENSSSCT00000012626	ENSSSCG00000011536	protein_coding	--
ENSSSCT00000029038	ENSSSCG00000026590	protein_coding	--
ENSSSCT00000035836	ENSSSCG00000001993	protein_coding	TGM1
ENSSSCT00000025252	ENSSSCG00000024555	protein_coding	ING2
ENSSSCT00000012622	ENSSSCG00000011532	protein_coding	SUMF1
ENSSSCT00000018146	ENSSSCG00000016667	protein_coding	--
ENSSSCT00000018632	ENSSSCG00000017114	protein_coding	NDUFS6
ENSSSCT00000029036	ENSSSCG00000029509	protein_coding	KIF22
ENSSSCT00000022922	ENSSSCG00000020929	protein_coding	--
ENSSSCT00000011132	ENSSSCG00000010166	protein_coding	NTPCR
ENSSSCT00000022858	ENSSSCG00000022118	protein_coding	ZBED6CL
ENSSSCT00000017500	ENSSSCG00000016073	protein_coding	--
ENSSSCT00000017506	ENSSSCG00000016078	protein_coding	HSPE1
ENSSSCT00000018703	ENSSSCG00000017178	protein_coding	SPHK1
ENSSSCT00000012757	ENSSSCG00000011653	protein_coding	PCCB
ENSSSCT00000029639	ENSSSCG00000023714	protein_coding	SLC31A2
ENSSSCT00000022851	ENSSSCG00000026577	protein_coding	--
ENSSSCT00000011003	ENSSSCG00000010042	protein_coding	ZNF280B
ENSSSCT00000005744	ENSSSCG00000005211	protein_coding	CD274
ENSSSCT00000034126	ENSSSCG00000023150	protein_coding	--
ENSSSCT00000007695	ENSSSCG00000007026	protein_coding	--
ENSSSCT00000031444	ENSSSCG00000030580	protein_coding	--
ENSSSCT00000007921	ENSSSCG00000007240	protein_coding	--
ENSSSCT00000024676	ENSSSCG00000027376	protein_coding	--
ENSSSCT00000006980	ENSSSCG00000006370	protein_coding	TSTD1
ENSSSCT00000004007	ENSSSCG00000003612	protein_coding	EIF3I
ENSSSCT00000005624	ENSSSCG00000005102	protein_coding	AEN
ENSSSCT00000004003	ENSSSCG00000003608	protein_coding	LCK
ENSSSCT00000004000	ENSSSCG00000003605	protein_coding	PTP4A2
ENSSSCT00000011223	ENSSSCG00000010253	protein_coding	HK1
ENSSSCT00000032187	ENSSSCG00000027219	protein_coding	--
ENSSSCT00000032181	ENSSSCG00000026832	protein_coding	CSF1
ENSSSCT00000010448	ENSSSCG00000009530	protein_coding	--
ENSSSCT00000007852	ENSSSCG00000007178	protein_coding	SNRPB
ENSSSCT00000007402	ENSSSCG00000006757	protein_coding	--
ENSSSCT00000007585	ENSSSCG00000024973	protein_coding	GBP5
ENSSSCT00000007584	ENSSSCG00000006924	protein_coding	GBP1
ENSSSCT00000030875	ENSSSCG00000028033	protein_coding	--
ENSSSCT00000014280	ENSSSCG00000013064	protein_coding	EEF1G
ENSSSCT00000036505	ENSSSCG00000004535	protein_coding	TCF4
ENSSSCT00000010007	ENSSSCG00000009139	protein_coding	PLA2G12A
ENSSSCT00000022700	ENSSSCG00000023932	protein_coding	PCDHGB7
ENSSSCT00000004178	ENSSSCG00000003775	protein_coding	RABGGTB
ENSSSCT00000015655	ENSSSCG00000014329	protein_coding	CDC25C
ENSSSCT00000030312	ENSSSCG00000029770	protein_coding	--
ENSSSCT00000010669	ENSSSCG00000009731	protein_coding	ZNF605
ENSSSCT00000017892	ENSSSCG00000016431	protein_coding	GALNTL5
ENSSSCT00000010192	ENSSSCG00000009304	protein_coding	--
ENSSSCT00000014757	ENSSSCG00000013510	protein_coding	UBXN6
ENSSSCT00000000100	ENSSSCG00000000094	protein_coding	SUN2
ENSSSCT00000000314	ENSSSCG00000000293	protein_coding	ITGA5
ENSSSCT00000009445	ENSSSCG00000008633	protein_coding	PDIA6
ENSSSCT00000031369	ENSSSCG00000025306	protein_coding	--
ENSSSCT00000009443	ENSSSCG00000008631	protein_coding	PQLC3
ENSSSCT00000019305	ENSSSCG00000017738	protein_coding	ADAP2
ENSSSCT00000010066	ENSSSCG00000009193	protein_coding	SMARCAD1
ENSSSCT00000017914	ENSSSCG00000016451	protein_coding	GIMAP1
ENSSSCT00000009047	ENSSSCG00000008261	protein_coding	HK2
ENSSSCT00000032161	ENSSSCG00000008456	protein_coding	--
ENSSSCT00000015728	ENSSSCG00000014391	protein_coding	ARAP3
ENSSSCT00000013122	ENSSSCG00000011993	protein_coding	--
ENSSSCT00000026359	ENSSSCG00000028531	protein_coding	--
ENSSSCT00000015722	ENSSSCG00000014385	protein_coding	PCDHGC5
ENSSSCT00000030826	ENSSSCG00000020763	protein_coding	--
ENSSSCT00000023437	ENSSSCG00000023489	protein_coding	CXCL9
ENSSSCT00000009992	ENSSSCG00000009125	protein_coding	ANK2
ENSSSCT00000030823	ENSSSCG00000024026	protein_coding	SUMO3
ENSSSCT00000009990	ENSSSCG00000009123	protein_coding	CAMK2D
ENSSSCT00000007325	ENSSSCG00000006686	protein_coding	PEX11B
ENSSSCT00000026919	ENSSSCG00000021557	protein_coding	--
ENSSSCT00000012432	ENSSSCG00000011355	protein_coding	COL7A1
ENSSSCT00000031994	ENSSSCG00000009834	protein_coding	ATXN2
ENSSSCT00000018621	ENSSSCG00000017103	protein_coding	SRD5A1
ENSSSCT00000000857	ENSSSCG00000000791	protein_coding	PDZRN4
ENSSSCT00000036092	ENSSSCG00000014372	protein_coding	--
ENSSSCT00000014529	ENSSSCG00000013303	protein_coding	ABTB2
ENSSSCT00000017270	ENSSSCG00000015859	protein_coding	SAP130
ENSSSCT00000028814	ENSSSCG00000026263	protein_coding	--
ENSSSCT00000002989	ENSSSCG00000002696	protein_coding	VAT1L
ENSSSCT00000017278	ENSSSCG00000015867	protein_coding	PRPF40A
ENSSSCT00000014831	ENSSSCG00000013579	protein_coding	CD209
ENSSSCT00000032577	ENSSSCG00000024378	protein_coding	--
ENSSSCT00000023099	ENSSSCG00000029685	protein_coding	--
ENSSSCT00000003907	ENSSSCG00000003517	protein_coding	--
ENSSSCT00000023724	ENSSSCG00000022280	protein_coding	DACT3
ENSSSCT00000032579	ENSSSCG00000021145	protein_coding	AP1S1
ENSSSCT00000007217	ENSSSCG00000006588	protein_coding	S100A9
ENSSSCT00000027089	ENSSSCG00000025394	protein_coding	--
ENSSSCT00000007219	ENSSSCG00000006590	protein_coding	S100A8
ENSSSCT00000007218	ENSSSCG00000006589	protein_coding	S100A12
ENSSSCT00000002743	ENSSSCG00000002471	protein_coding	ISG12(A)
ENSSSCT00000027403	ENSSSCG00000030444	protein_coding	--
ENSSSCT00000035235	ENSSSCG00000009138	protein_coding	CFI
ENSSSCT00000028972	ENSSSCG00000030165	protein_coding	MAFF
ENSSSCT00000006188	ENSSSCG00000005628	protein_coding	ST6GALNAC4
ENSSSCT00000007106	ENSSSCG00000006487	protein_coding	CCT3
ENSSSCT00000027391	ENSSSCG00000021347	protein_coding	--
ENSSSCT00000030954	ENSSSCG00000022594	protein_coding	--
ENSSSCT00000023546	ENSSSCG00000022174	protein_coding	--
ENSSSCT00000030481	ENSSSCG00000020916	protein_coding	--
ENSSSCT00000012687	ENSSSCG00000011591	protein_coding	--
ENSSSCT00000027887	ENSSSCG00000029414	protein_coding	--
ENSSSCT00000027711	ENSSSCG00000028346	protein_coding	SAMM50
ENSSSCT00000009339	ENSSSCG00000008535	protein_coding	CLIP4
ENSSSCT00000003588	ENSSSCG00000003229	protein_coding	ETFB
ENSSSCT00000018994	ENSSSCG00000017448	protein_coding	KRT19
ENSSSCT00000017088	ENSSSCG00000015688	protein_coding	CXCR4
ENSSSCT00000011926	ENSSSCG00000010900	protein_coding	--
ENSSSCT00000011923	ENSSSCG00000010897	protein_coding	--
ENSSSCT00000024281	ENSSSCG00000030092	protein_coding	--
ENSSSCT00000007838	ENSSSCG00000007165	protein_coding	MRPS26
ENSSSCT00000003169	ENSSSCG00000002868	protein_coding	--
ENSSSCT00000001859	ENSSSCG00000001667	protein_coding	ZNF318
ENSSSCT00000017550	ENSSSCG00000016119	protein_coding	RAPH1
ENSSSCT00000012294	ENSSSCG00000011227	protein_coding	--
ENSSSCT00000028150	ENSSSCG00000025181	protein_coding	--
ENSSSCT00000001851	ENSSSCG00000001660	protein_coding	PTK7
ENSSSCT00000000589	ENSSSCG00000000546	protein_coding	MANSC4
ENSSSCT00000013183	ENSSSCG00000012051	protein_coding	RUNX1
ENSSSCT00000013187	ENSSSCG00000012055	protein_coding	MORC3
ENSSSCT00000030551	ENSSSCG00000021023	protein_coding	SCAF4
ENSSSCT00000030556	ENSSSCG00000027877	protein_coding	TLR10
ENSSSCT00000030558	ENSSSCG00000023331	protein_coding	UBL5
ENSSSCT00000031596	ENSSSCG00000029306	protein_coding	--
ENSSSCT00000000299	ENSSSCG00000000278	protein_coding	--
ENSSSCT00000000292	ENSSSCG00000000273	protein_coding	PRR13
ENSSSCT00000019484	ENSSSCG00000017904	protein_coding	ENO3
ENSSSCT00000000296	ENSSSCG00000000276	protein_coding	TARBP2
ENSSSCT00000000294	ENSSSCG00000000274	protein_coding	PCBP2
ENSSSCT00000008278	ENSSSCG00000007546	protein_coding	C7orf50
ENSSSCT00000019152	ENSSSCG00000024673	protein_coding	NME1
ENSSSCT00000019150	ENSSSCG00000017591	protein_coding	NME2
ENSSSCT00000003017	ENSSSCG00000002723	protein_coding	AARS
ENSSSCT00000019154	ENSSSCG00000017593	protein_coding	UTP18
ENSSSCT00000003019	ENSSSCG00000002725	protein_coding	--
ENSSSCT00000008276	ENSSSCG00000007544	protein_coding	--
ENSSSCT00000008277	ENSSSCG00000007545	protein_coding	GET4
ENSSSCT00000028399	ENSSSCG00000022208	protein_coding	TNFRSF1B
ENSSSCT00000026848	ENSSSCG00000024936	protein_coding	C1QTNF5
ENSSSCT00000028391	ENSSSCG00000027745	protein_coding	ABCG1
ENSSSCT00000017460	ENSSSCG00000016035	protein_coding	COL5A2
ENSSSCT00000012103	ENSSSCG00000011059	protein_coding	--
ENSSSCT00000028396	ENSSSCG00000024333	protein_coding	--
ENSSSCT00000000452	ENSSSCG00000000418	protein_coding	TAC3
ENSSSCT00000027869	ENSSSCG00000022925	protein_coding	--
ENSSSCT00000001983	ENSSSCG00000001770	protein_coding	CTSH
ENSSSCT00000006626	ENSSSCG00000006037	protein_coding	--
ENSSSCT00000010856	ENSSSCG00000009906	protein_coding	SRSF9
ENSSSCT00000006995	ENSSSCG00000006382	protein_coding	SLAMF6
ENSSSCT00000025711	ENSSSCG00000020906	protein_coding	TNFSF10
ENSSSCT00000008612	ENSSSCG00000007861	protein_coding	GP2
ENSSSCT00000007466	ENSSSCG00000006815	protein_coding	--
ENSSSCT00000035827	ENSSSCG00000000656	protein_coding	CLEC2B
ENSSSCT00000022444	ENSSSCG00000024987	protein_coding	NR3C2
ENSSSCT00000018606	ENSSSCG00000017089	protein_coding	ANXA6
ENSSSCT00000012630	ENSSSCG00000011540	protein_coding	--
ENSSSCT00000029040	ENSSSCG00000026923	protein_coding	--
ENSSSCT00000029604	ENSSSCG00000025425	protein_coding	FUK
ENSSSCT00000012032	ENSSSCG00000010991	protein_coding	AQP3
ENSSSCT00000012035	ENSSSCG00000010994	protein_coding	--
ENSSSCT00000029602	ENSSSCG00000021498	protein_coding	--
ENSSSCT00000007918	ENSSSCG00000007237	protein_coding	--
ENSSSCT00000004689	ENSSSCG00000004242	protein_coding	TBC1D32
ENSSSCT00000008580	ENSSSCG00000007830	protein_coding	RBBP6
ENSSSCT00000005532	ENSSSCG00000005016	protein_coding	L2HGDH
ENSSSCT00000005534	ENSSSCG00000005018	protein_coding	CDKL1
ENSSSCT00000008056	ENSSSCG00000007361	protein_coding	--
ENSSSCT00000008725	ENSSSCG00000007962	protein_coding	--
ENSSSCT00000032374	ENSSSCG00000026946	protein_coding	ZCCHC24
ENSSSCT00000019021	ENSSSCG00000017472	protein_coding	IGFBP4
ENSSSCT00000019026	ENSSSCG00000017475	protein_coding	RARA
ENSSSCT00000033209	ENSSSCG00000010580	protein_coding	NFKB2
ENSSSCT00000005966	ENSSSCG00000005423	protein_coding	--
ENSSSCT00000011212	ENSSSCG00000010243	protein_coding	--
ENSSSCT00000006840	ENSSSCG00000006242	protein_coding	IMPAD1
ENSSSCT00000011456	ENSSSCG00000010468	protein_coding	CPEB3
ENSSSCT00000016334	ENSSSCG00000014972	protein_coding	CCDC82
ENSSSCT00000006846	ENSSSCG00000006247	protein_coding	PLAG1
ENSSSCT00000010983	ENSSSCG00000010026	protein_coding	PIK3IP1
ENSSSCT00000010981	ENSSSCG00000010024	protein_coding	RNF185
ENSSSCT00000010454	ENSSSCG00000009536	protein_coding	ARGLU1
ENSSSCT00000031541	ENSSSCG00000029683	protein_coding	--
ENSSSCT00000015342	ENSSSCG00000014045	protein_coding	--
ENSSSCT00000024710	ENSSSCG00000027687	protein_coding	--
ENSSSCT00000024713	ENSSSCG00000026268	protein_coding	DLG5
ENSSSCT00000008297	ENSSSCG00000007565	protein_coding	TTYH3
ENSSSCT00000015345	ENSSSCG00000014048	protein_coding	HK3
ENSSSCT00000014518	ENSSSCG00000013293	protein_coding	COMMD9
ENSSSCT00000025625	ENSSSCG00000027508	protein_coding	--
ENSSSCT00000010293	ENSSSCG00000009394	protein_coding	ARL11
ENSSSCT00000030705	ENSSSCG00000028755	protein_coding	TSSC1
ENSSSCT00000030018	ENSSSCG00000025624	protein_coding	--
ENSSSCT00000015648	ENSSSCG00000014322	protein_coding	HNRNPA0
ENSSSCT00000024405	ENSSSCG00000023998	protein_coding	PSMD2
ENSSSCT00000010270	ENSSSCG00000009373	protein_coding	--
ENSSSCT00000032081	ENSSSCG00000026122	protein_coding	THAP5
ENSSSCT00000011535	ENSSSCG00000010544	protein_coding	DNMBP
ENSSSCT00000012969	ENSSSCG00000011856	protein_coding	RPL35A
ENSSSCT00000025136	ENSSSCG00000023533	protein_coding	--
ENSSSCT00000017887	ENSSSCG00000016426	protein_coding	--
ENSSSCT00000034669	ENSSSCG00000001769	protein_coding	MORF4L1
ENSSSCT00000017880	ENSSSCG00000016420	protein_coding	INSIG1
ENSSSCT00000010181	ENSSSCG00000009293	protein_coding	--
ENSSSCT00000025531	ENSSSCG00000025712	protein_coding	--
ENSSSCT00000005400	ENSSSCG00000004894	protein_coding	SERPINB5
ENSSSCT00000005403	ENSSSCG00000004897	protein_coding	ZCCHC2
ENSSSCT00000010188	ENSSSCG00000009300	protein_coding	WASF3
ENSSSCT00000000114	ENSSSCG00000000108	protein_coding	TMEM184B
ENSSSCT00000009189	ENSSSCG00000008392	protein_coding	BCL11A
ENSSSCT00000005745	ENSSSCG00000005212	protein_coding	PLGRKT
ENSSSCT00000015734	ENSSSCG00000014396	protein_coding	KIAA0141
ENSSSCT00000009185	ENSSSCG00000008388	protein_coding	REL
ENSSSCT00000009186	ENSSSCG00000008389	protein_coding	PAPOLG
ENSSSCT00000014604	ENSSSCG00000028525	protein_coding	--
ENSSSCT00000009458	ENSSSCG00000008645	protein_coding	ID2
ENSSSCT00000008448	ENSSSCG00000007705	protein_coding	--
ENSSSCT00000030886	ENSSSCG00000022197	protein_coding	HS6ST1
ENSSSCT00000004618	ENSSSCG00000004179	protein_coding	VNN2
ENSSSCT00000013502	ENSSSCG00000012347	protein_coding	ALAS2
ENSSSCT00000001227	ENSSSCG00000001131	protein_coding	--
ENSSSCT00000031839	ENSSSCG00000023930	protein_coding	--
ENSSSCT00000030836	ENSSSCG00000030251	protein_coding	--
ENSSSCT00000009233	ENSSSCG00000008432	protein_coding	C2orf61
ENSSSCT00000026383	ENSSSCG00000026475	protein_coding	RRN3
ENSSSCT00000026922	ENSSSCG00000021742	protein_coding	--
ENSSSCT00000026431	ENSSSCG00000027807	protein_coding	--
ENSSSCT00000030839	ENSSSCG00000029842	protein_coding	--
ENSSSCT00000026389	ENSSSCG00000021600	protein_coding	--
ENSSSCT00000016598	ENSSSCG00000015232	protein_coding	ST3GAL4
ENSSSCT00000001539	ENSSSCG00000001408	protein_coding	AIF1
ENSSSCT00000004725	ENSSSCG00000004275	protein_coding	FAM135A
ENSSSCT00000000849	ENSSSCG00000000784	protein_coding	LRRK2
ENSSSCT00000001533	ENSSSCG00000001404	protein_coding	TNF
ENSSSCT00000028802	ENSSSCG00000029855	protein_coding	LHFP
ENSSSCT00000002621	ENSSSCG00000002357	protein_coding	ALDH6A1
ENSSSCT00000014517	ENSSSCG00000013292	protein_coding	PRR5L
ENSSSCT00000014510	ENSSSCG00000013286	protein_coding	LRRC4C
ENSSSCT00000027521	ENSSSCG00000025030	protein_coding	--
ENSSSCT00000003977	ENSSSCG00000003582	protein_coding	SMPDL3B
ENSSSCT00000003971	ENSSSCG00000003577	protein_coding	WASF2
ENSSSCT00000009520	ENSSSCG00000008701	protein_coding	LRPAP1
ENSSSCT00000016938	ENSSSCG00000015548	protein_coding	RGSL1
ENSSSCT00000027097	ENSSSCG00000024020	protein_coding	--
ENSSSCT00000007264	ENSSSCG00000006628	protein_coding	PSMD4
ENSSSCT00000001150	ENSSSCG00000001056	protein_coding	RANBP9
ENSSSCT00000001155	ENSSSCG00000001061	protein_coding	JARID2
ENSSSCT00000001159	ENSSSCG00000001064	protein_coding	GMPR
ENSSSCT00000006198	ENSSSCG00000005636	protein_coding	SLC25A25
ENSSSCT00000002196	ENSSSCG00000001963	protein_coding	EGLN3
ENSSSCT00000035227	ENSSSCG00000030731	protein_coding	TMP-SLA-2
ENSSSCT00000002192	ENSSSCG00000001959	protein_coding	CFL2
ENSSSCT00000023373	ENSSSCG00000023974	protein_coding	PHF21A
ENSSSCT00000023370	ENSSSCG00000025429	protein_coding	--
ENSSSCT00000000783	ENSSSCG00000000720	protein_coding	AKAP3
ENSSSCT00000028499	ENSSSCG00000026596	protein_coding	SYNRG
ENSSSCT00000002693	ENSSSCG00000002424	protein_coding	SPATA7
ENSSSCT00000027672	ENSSSCG00000024623	protein_coding	USP25
ENSSSCT00000027671	ENSSSCG00000025252	protein_coding	PEX5
ENSSSCT00000027674	ENSSSCG00000021821	protein_coding	MYO1C
ENSSSCT00000003572	ENSSSCG00000003216	protein_coding	POLD1
ENSSSCT00000024875	ENSSSCG00000022409	protein_coding	DNASE1L1
ENSSSCT00000002576	ENSSSCG00000002314	protein_coding	--
ENSSSCT00000027259	ENSSSCG00000030141	protein_coding	--
ENSSSCT00000027258	ENSSSCG00000022112	protein_coding	DOCK9
ENSSSCT00000012485	ENSSSCG00000011405	protein_coding	HYAL2
ENSSSCT00000031304	ENSSSCG00000023891	protein_coding	GRM7
ENSSSCT00000002698	ENSSSCG00000002429	protein_coding	FOXN3
ENSSSCT00000002281	ENSSSCG00000002039	protein_coding	MMP14
ENSSSCT00000017072	ENSSSCG00000015673	protein_coding	KYNU
ENSSSCT00000017070	ENSSSCG00000015671	protein_coding	--
ENSSSCT00000027002	ENSSSCG00000030325	protein_coding	C1QTNF6
ENSSSCT00000016615	ENSSSCG00000015246	protein_coding	ST14
ENSSSCT00000016613	ENSSSCG00000015244	protein_coding	APLP2
ENSSSCT00000010964	ENSSSCG00000010007	protein_coding	MTFP1
ENSSSCT00000024276	ENSSSCG00000022645	protein_coding	H2AFX
ENSSSCT00000006506	ENSSSCG00000005926	protein_coding	PARP10
ENSSSCT00000016778	ENSSSCG00000015403	protein_coding	HGF
ENSSSCT00000028128	ENSSSCG00000024417	protein_coding	--
ENSSSCT00000026996	ENSSSCG00000027441	protein_coding	RPL22L1
ENSSSCT00000024474	ENSSSCG00000027709	protein_coding	PARP9
ENSSSCT00000012359	ENSSSCG00000011289	protein_coding	ACKR2
ENSSSCT00000012354	ENSSSCG00000011284	protein_coding	NKTR
ENSSSCT00000013198	ENSSSCG00000012066	protein_coding	KCNJ15
ENSSSCT00000003713	ENSSSCG00000003344	protein_coding	VWA1
ENSSSCT00000016812	ENSSSCG00000015432	protein_coding	ATXN7L1
ENSSSCT00000007004	ENSSSCG00000006391	protein_coding	ATP1A2
ENSSSCT00000007005	ENSSSCG00000006392	protein_coding	IGSF8
ENSSSCT00000007659	ENSSSCG00000006994	protein_coding	--
ENSSSCT00000008468	ENSSSCG00000007723	protein_coding	RCC1L
ENSSSCT00000031488	ENSSSCG00000022323	protein_coding	--
ENSSSCT00000000280	ENSSSCG00000000261	protein_coding	IGFBP6
ENSSSCT00000000283	ENSSSCG00000000264	protein_coding	--
ENSSSCT00000015132	ENSSSCG00000013853	protein_coding	HSH2D
ENSSSCT00000000285	ENSSSCG00000000266	protein_coding	PFDN5
ENSSSCT00000000284	ENSSSCG00000000265	protein_coding	ESPL1
ENSSSCT00000008915	ENSSSCG00000008138	protein_coding	GCC2
ENSSSCT00000008261	ENSSSCG00000007530	protein_coding	PPP1R3D
ENSSSCT00000003625	ENSSSCG00000003264	protein_coding	CNOT3
ENSSSCT00000003628	ENSSSCG00000003267	protein_coding	MBOAT7
ENSSSCT00000008869	ENSSSCG00000008096	protein_coding	ZC3H6
ENSSSCT00000014277	ENSSSCG00000013061	protein_coding	EML3
ENSSSCT00000027871	ENSSSCG00000028165	protein_coding	--
ENSSSCT00000027870	ENSSSCG00000030160	protein_coding	--
ENSSSCT00000012132	ENSSSCG00000011085	protein_coding	MLLT10
ENSSSCT00000017456	ENSSSCG00000016031	protein_coding	CALCRL
ENSSSCT00000007715	ENSSSCG00000007046	protein_coding	TRMT6
ENSSSCT00000017459	ENSSSCG00000016034	protein_coding	COL3A1
ENSSSCT00000016105	ENSSSCG00000014754	protein_coding	OR51T1
ENSSSCT00000006612	ENSSSCG00000006025	protein_coding	PKHD1L1
ENSSSCT00000024123	ENSSSCG00000026507	protein_coding	--
ENSSSCT00000033065	ENSSSCG00000030776	protein_coding	CH242-9E10.1
ENSSSCT00000007479	ENSSSCG00000006828	protein_coding	ATXN7L2
ENSSSCT00000028497	ENSSSCG00000021975	protein_coding	--
ENSSSCT00000010864	ENSSSCG00000009914	protein_coding	MLEC
ENSSSCT00000010866	ENSSSCG00000009916	protein_coding	ACADS
ENSSSCT00000014198	ENSSSCG00000012988	protein_coding	--
ENSSSCT00000008784	ENSSSCG00000008016	protein_coding	MRPS34
ENSSSCT00000019357	ENSSSCG00000017785	protein_coding	NUFIP2
ENSSSCT00000012642	ENSSSCG00000011552	protein_coding	ARPC4
ENSSSCT00000012005	ENSSSCG00000010968	protein_coding	IL11RA
ENSSSCT00000025386	ENSSSCG00000023760	protein_coding	CLEC14A
ENSSSCT00000017520	ENSSSCG00000016092	protein_coding	SGO2
ENSSSCT00000012002	ENSSSCG00000010965	protein_coding	CCL21
ENSSSCT00000012003	ENSSSCG00000010966	protein_coding	CCL19
ENSSSCT00000018724	ENSSSCG00000017199	protein_coding	TRIM47
ENSSSCT00000011020	ENSSSCG00000010059	protein_coding	GUCD1
ENSSSCT00000024494	ENSSSCG00000030388	protein_coding	UPP1
ENSSSCT00000011024	ENSSSCG00000010063	protein_coding	DDT
ENSSSCT00000008595	ENSSSCG00000007845	protein_coding	--
ENSSSCT00000034495	ENSSSCG00000010453	protein_coding	IFIT1
ENSSSCT00000015226	ENSSSCG00000013940	protein_coding	NLRP3
ENSSSCT00000008593	ENSSSCG00000007843	protein_coding	--
ENSSSCT00000015222	ENSSSCG00000013936	protein_coding	NDUFA13
ENSSSCT00000005525	ENSSSCG00000005009	protein_coding	KLHDC2
ENSSSCT00000005522	ENSSSCG00000005006	protein_coding	MGAT2
ENSSSCT00000005521	ENSSSCG00000005005	protein_coding	RPL36A
ENSSSCT00000019057	ENSSSCG00000017504	protein_coding	CDK12
ENSSSCT00000005425	ENSSSCG00000004917	protein_coding	MALT1
ENSSSCT00000022546	ENSSSCG00000020941	protein_coding	LTB4R2
ENSSSCT00000011209	ENSSSCG00000010241	protein_coding	--
ENSSSCT00000018503	ENSSSCG00000016992	protein_coding	--
ENSSSCT00000014145	ENSSSCG00000012940	protein_coding	B4GAT1
ENSSSCT00000022383	ENSSSCG00000024844	protein_coding	--
ENSSSCT00000011206	ENSSSCG00000010239	protein_coding	RUFY2
ENSSSCT00000011440	ENSSSCG00000010454	protein_coding	IFIT5
ENSSSCT00000022943	ENSSSCG00000024458	protein_coding	PDXK
ENSSSCT00000016327	ENSSSCG00000014966	protein_coding	SESN3
ENSSSCT00000016328	ENSSSCG00000014967	protein_coding	FAM76B
ENSSSCT00000010462	ENSSSCG00000009544	protein_coding	COL4A1
ENSSSCT00000010463	ENSSSCG00000009545	protein_coding	COL4A2
ENSSSCT00000024726	ENSSSCG00000022780	protein_coding	--
ENSSSCT00000025638	ENSSSCG00000029493	protein_coding	--
ENSSSCT00000007879	ENSSSCG00000007200	protein_coding	FAM110A
ENSSSCT00000014771	ENSSSCG00000013524	protein_coding	C19orf70
ENSSSCT00000004116	ENSSSCG00000003716	protein_coding	SS18
ENSSSCT00000004110	ENSSSCG00000003711	protein_coding	--
ENSSSCT00000022768	ENSSSCG00000021160	protein_coding	--
ENSSSCT00000022765	ENSSSCG00000030305	protein_coding	SLC15A2
ENSSSCT00000010242	ENSSSCG00000009345	protein_coding	--
ENSSSCT00000003487	ENSSSCG00000003144	protein_coding	BAX
ENSSSCT00000007497	ENSSSCG00000006845	protein_coding	PRPF38B
ENSSSCT00000030778	ENSSSCG00000026274	protein_coding	--
ENSSSCT00000030371	ENSSSCG00000030082	protein_coding	--
ENSSSCT00000008139	ENSSSCG00000007436	protein_coding	MMP9
ENSSSCT00000014174	ENSSSCG00000012967	protein_coding	FOSL1
ENSSSCT00000014175	ENSSSCG00000012968	protein_coding	CCDC85B
ENSSSCT00000005737	ENSSSCG00000005205	protein_coding	KIAA2026
ENSSSCT00000014618	ENSSSCG00000013384	protein_coding	--
ENSSSCT00000012822	ENSSSCG00000011712	protein_coding	P2RY14
ENSSSCT00000012823	ENSSSCG00000011713	protein_coding	P2RY12
ENSSSCT00000012820	ENSSSCG00000011710	protein_coding	EIF2A
ENSSSCT00000012826	ENSSSCG00000011716	protein_coding	P2RY13
ENSSSCT00000009426	ENSSSCG00000008615	protein_coding	VSNL1
ENSSSCT00000009425	ENSSSCG00000008614	protein_coding	SMC6
ENSSSCT00000024822	ENSSSCG00000030364	protein_coding	--
ENSSSCT00000016859	ENSSSCG00000015476	protein_coding	CHI3L1
ENSSSCT00000017986	ENSSSCG00000016518	protein_coding	--
ENSSSCT00000030205	ENSSSCG00000023040	protein_coding	--
ENSSSCT00000022361	ENSSSCG00000023912	protein_coding	--
ENSSSCT00000004602	ENSSSCG00000004163	protein_coding	BCLAF1
ENSSSCT00000004605	ENSSSCG00000004166	protein_coding	AHI1
ENSSSCT00000008495	ENSSSCG00000007748	protein_coding	PSPH
ENSSSCT00000001230	ENSSSCG00000001134	protein_coding	--
ENSSSCT00000005088	ENSSSCG00000004607	protein_coding	PYGO1
ENSSSCT00000015470	ENSSSCG00000014161	protein_coding	--
ENSSSCT00000001097	ENSSSCG00000001005	protein_coding	PSMG4
ENSSSCT00000017395	ENSSSCG00000015976	protein_coding	LNPK
ENSSSCT00000009083	ENSSSCG00000008294	protein_coding	ACTG2
ENSSSCT00000005084	ENSSSCG00000004603	protein_coding	RFX7
ENSSSCT00000009734	ENSSSCG00000008891	protein_coding	--
ENSSSCT00000031822	ENSSSCG00000025766	protein_coding	SLC10A3
ENSSSCT00000006294	ENSSSCG00000005724	protein_coding	SETX
ENSSSCT00000000941	ENSSSCG00000000862	protein_coding	--
ENSSSCT00000032419	ENSSSCG00000028664	protein_coding	NPG1
ENSSSCT00000018300	ENSSSCG00000016809	protein_coding	DROSHA
ENSSSCT00000006154	ENSSSCG00000005596	protein_coding	ARPC5L
ENSSSCT00000026731	ENSSSCG00000022719	protein_coding	RAB20
ENSSSCT00000036248	ENSSSCG00000014048	protein_coding	HK3
ENSSSCT00000015699	ENSSSCG00000014369	protein_coding	CD14
ENSSSCT00000013203	ENSSSCG00000012071	protein_coding	IGSF5
ENSSSCT00000013202	ENSSSCG00000012070	protein_coding	B3GALT5
ENSSSCT00000028831	ENSSSCG00000029933	protein_coding	--
ENSSSCT00000001524	ENSSSCG00000024161	protein_coding	SLA-7
ENSSSCT00000013209	ENSSSCG00000012076	protein_coding	MX2
ENSSSCT00000002612	ENSSSCG00000002348	protein_coding	--
ENSSSCT00000028838	ENSSSCG00000025182	protein_coding	ELK4
ENSSSCT00000017210	ENSSSCG00000015803	protein_coding	CYP4V2
ENSSSCT00000017198	ENSSSCG00000015795	protein_coding	CCDC110
ENSSSCT00000031953	ENSSSCG00000000191	protein_coding	KMT2D
ENSSSCT00000019679	ENSSSCG00000018084	protein_coding	ND3
ENSSSCT00000028955	ENSSSCG00000025075	protein_coding	--
ENSSSCT00000009555	ENSSSCG00000008735	protein_coding	BOD1L1
ENSSSCT00000023700	ENSSSCG00000022082	protein_coding	--
ENSSSCT00000031571	ENSSSCG00000022895	protein_coding	--
ENSSSCT00000026640	ENSSSCG00000020702	protein_coding	SENP6
ENSSSCT00000028764	ENSSSCG00000025243	protein_coding	SGIP1
ENSSSCT00000001143	ENSSSCG00000001049	protein_coding	HIVEP1
ENSSSCT00000001147	ENSSSCG00000001053	protein_coding	TBC1D7
ENSSSCT00000016360	ENSSSCG00000014996	protein_coding	CASP12
ENSSSCT00000031309	ENSSSCG00000030543	protein_coding	COTL1
ENSSSCT00000027467	ENSSSCG00000025720	protein_coding	--
ENSSSCT00000017320	ENSSSCG00000015907	protein_coding	GALNT3
ENSSSCT00000013346	ENSSSCG00000012201	protein_coding	CXorf21
ENSSSCT00000002141	ENSSSCG00000001912	protein_coding	PML
ENSSSCT00000003560	ENSSSCG00000003205	protein_coding	--
ENSSSCT00000027267	ENSSSCG00000023325	protein_coding	ACY1
ENSSSCT00000002540	ENSSSCG00000002282	protein_coding	MAX
ENSSSCT00000011849	ENSSSCG00000010831	protein_coding	DUSP10
ENSSSCT00000028713	ENSSSCG00000027827	protein_coding	GALE
ENSSSCT00000017061	ENSSSCG00000015663	protein_coding	C4BPA
ENSSSCT00000003810	ENSSSCG00000003432	protein_coding	KIAA2013
ENSSSCT00000003813	ENSSSCG00000003435	protein_coding	MIIP
ENSSSCT00000017065	ENSSSCG00000015667	protein_coding	--
ENSSSCT00000028718	ENSSSCG00000025001	protein_coding	--
ENSSSCT00000017066	ENSSSCG00000015668	protein_coding	ORC4
ENSSSCT00000011904	ENSSSCG00000010881	protein_coding	--
ENSSSCT00000006510	ENSSSCG00000005930	protein_coding	SLC45A4
ENSSSCT00000027113	ENSSSCG00000023851	protein_coding	--
ENSSSCT00000027115	ENSSSCG00000027840	protein_coding	--
ENSSSCT00000015031	ENSSSCG00000013757	protein_coding	C19orf53
ENSSSCT00000024465	ENSSSCG00000023356	protein_coding	--
ENSSSCT00000002388	ENSSSCG00000002135	protein_coding	PNP
ENSSSCT00000003708	ENSSSCG00000003339	protein_coding	CPSF3L
ENSSSCT00000003701	ENSSSCG00000003334	protein_coding	UBE2J2
ENSSSCT00000017193	ENSSSCG00000015790	protein_coding	SLC25A4
ENSSSCT00000012340	ENSSSCG00000011272	protein_coding	RPL14
ENSSSCT00000008762	ENSSSCG00000007995	protein_coding	MCRIP2
ENSSSCT00000024007	ENSSSCG00000025042	protein_coding	ICOS
ENSSSCT00000003115	ENSSSCG00000002815	protein_coding	ADGRG1
ENSSSCT00000019137	ENSSSCG00000017579	protein_coding	--
ENSSSCT00000008928	ENSSSCG00000008151	protein_coding	MFSD9
ENSSSCT00000019133	ENSSSCG00000017576	protein_coding	--
ENSSSCT00000028229	ENSSSCG00000026803	protein_coding	--
ENSSSCT00000019139	ENSSSCG00000017581	protein_coding	--
ENSSSCT00000004288	ENSSSCG00000003876	protein_coding	CDKN2C
ENSSSCT00000017680	ENSSSCG00000016237	protein_coding	--
ENSSSCT00000029442	ENSSSCG00000022339	protein_coding	--
ENSSSCT00000015009	ENSSSCG00000013735	protein_coding	--
ENSSSCT00000007701	ENSSSCG00000007032	protein_coding	PLAT
ENSSSCT00000017445	ENSSSCG00000016022	protein_coding	ZNF804A
ENSSSCT00000006954	ENSSSCG00000006346	protein_coding	--
ENSSSCT00000012123	ENSSSCG00000011077	protein_coding	MSRB2
ENSSSCT00000002945	ENSSSCG00000002654	protein_coding	--
ENSSSCT00000000438	ENSSSCG00000000405	protein_coding	ATP5B
ENSSSCT00000024396	ENSSSCG00000022765	protein_coding	--
ENSSSCT00000030141	ENSSSCG00000020972	protein_coding	--
ENSSSCT00000030140	ENSSSCG00000030548	protein_coding	--
ENSSSCT00000030143	ENSSSCG00000023594	protein_coding	RARRES2
ENSSSCT00000025735	ENSSSCG00000022164	protein_coding	HSF2BP
ENSSSCT00000017720	ENSSSCG00000016272	protein_coding	--
ENSSSCT00000012651	ENSSSCG00000011560	protein_coding	CRELD1
ENSSSCT00000000251	ENSSSCG00000000232	protein_coding	ACVRL1
ENSSSCT00000015279	ENSSSCG00000013988	protein_coding	IBA57
ENSSSCT00000017536	ENSSSCG00000016106	protein_coding	--
ENSSSCT00000028012	ENSSSCG00000025095	protein_coding	--
ENSSSCT00000000541	ENSSSCG00000000502	protein_coding	CNOT2
ENSSSCT00000031494	ENSSSCG00000028960	protein_coding	--
ENSSSCT00000001892	ENSSSCG00000001695	protein_coding	--
ENSSSCT00000000548	ENSSSCG00000000509	protein_coding	--
ENSSSCT00000031490	ENSSSCG00000026930	protein_coding	HIST1H2BN
ENSSSCT00000001895	ENSSSCG00000001696	protein_coding	MRPL14
ENSSSCT00000022559	ENSSSCG00000030291	protein_coding	RPRD2
ENSSSCT00000018269	ENSSSCG00000016782	protein_coding	FAM105A
ENSSSCT00000025356	ENSSSCG00000028197	protein_coding	PFKL
ENSSSCT00000018559	ENSSSCG00000017046	protein_coding	--
ENSSSCT00000022550	ENSSSCG00000029375	protein_coding	ZNF205
ENSSSCT00000019047	ENSSSCG00000017494	protein_coding	IKZF3
ENSSSCT00000025359	ENSSSCG00000025104	protein_coding	-
ENSSSCT00000000043	ENSSSCG00000000041	protein_coding	WBP2NL
ENSSSCT00000022886	ENSSSCG00000025248	protein_coding	--
ENSSSCT00000032312	ENSSSCG00000026368	protein_coding	--
ENSSSCT00000011279	ENSSSCG00000010306	protein_coding	SEC24C
ENSSSCT00000018066	ENSSSCG00000016593	protein_coding	ARF5
ENSSSCT00000013747	ENSSSCG00000012572	protein_coding	--
ENSSSCT00000031762	ENSSSCG00000027308	protein_coding	--
ENSSSCT00000018664	ENSSSCG00000017144	protein_coding	NPTX1
ENSSSCT00000022956	ENSSSCG00000021050	protein_coding	--
ENSSSCT00000006862	ENSSSCG00000006263	protein_coding	ATP6V1H
ENSSSCT00000007804	ENSSSCG00000007132	protein_coding	--
ENSSSCT00000007805	ENSSSCG00000007133	protein_coding	ACSS1
ENSSSCT00000015360	ENSSSCG00000014061	protein_coding	THOC3
ENSSSCT00000007803	ENSSSCG00000007131	protein_coding	CST7
ENSSSCT00000009595	ENSSSCG00000008770	protein_coding	NWD2
ENSSSCT00000014761	ENSSSCG00000013514	protein_coding	LRG1
ENSSSCT00000000139	ENSSSCG00000000133	protein_coding	TST
ENSSSCT00000004127	ENSSSCG00000003727	protein_coding	--
ENSSSCT00000010253	ENSSSCG00000009356	protein_coding	RFXAP
ENSSSCT00000011308	ENSSSCG00000010330	protein_coding	--
ENSSSCT00000011309	ENSSSCG00000010331	protein_coding	ANXA11
ENSSSCT00000010256	ENSSSCG00000009359	protein_coding	--
ENSSSCT00000006773	ENSSSCG00000006179	protein_coding	STAU2
ENSSSCT00000011310	ENSSSCG00000010332	protein_coding	PLAC9
ENSSSCT00000010657	ENSSSCG00000009720	protein_coding	DDX60
ENSSSCT00000010652	ENSSSCG00000009716	protein_coding	SH3RF1
ENSSSCT00000005268	ENSSSCG00000004769	protein_coding	--
ENSSSCT00000000691	ENSSSCG00000000641	protein_coding	KLRK1
ENSSSCT00000013692	ENSSSCG00000012523	protein_coding	TCEAL8
ENSSSCT00000005463	ENSSSCG00000004951	protein_coding	AAGAB
ENSSSCT00000015755	ENSSSCG00000014416	protein_coding	TCERG1
ENSSSCT00000013521	ENSSSCG00000012364	protein_coding	--
ENSSSCT00000005721	ENSSSCG00000005190	protein_coding	NFIB
ENSSSCT00000015138	ENSSSCG00000013859	protein_coding	C19orf44
ENSSSCT00000005728	ENSSSCG00000005196	protein_coding	--
[truncated: 171 more rows]
