# Supplementary material for: Analyses of long non-coding RNA and mRNA profiling in the spleen of diarrheic piglets caused by Clostridium perfringens type C
Source: PeerJ. 2018 Nov 30;6:e5997. doi: 10.7717/peerj.5997 (PMC6276591; doi:10.7717/peerj.5997)
Supplement: Supplemental Information 4 [file peerj-06-5997-s004.xlsx]

## Sheet: Primer
Gene name	Acession No.	Primer sequence		Amplification length (bp)	Tm (°C)
ACTB (β-actin )	XM_003124280.5	F	AGGCGGACTGTTAGTTGCAT	187	59
		R	TGTCACCTTCACCGTTCCAG
ALDBSSCT0000007366		F	TGCCTGTTTCAGGTCTGAGG	162	60
		R	TGTCTGATGGAGCCTCACTG
ALDBSSCT0000006918		F	GAAACCCATGCAGTGGAAGT	173	59
		R	GCAGGGATGTGTTGTGTGTC
ALDBSSCT0000007894		F	GTGGTGCAGGTTTGATCCCT	166	60
		R	AGGTTGTGGTCACTTCTGCT
CEBPD	XM_005663091.2	F	GCTTCTCAAACAGGCCGAAC	162	59
		R	CGGATAACCTCAGCCCTCTT
HIST1H2BC	XM_003356567.4	F	TGGCGCATTACAACAAGCG	155	59
		R	TCCAGACACAGGAACTCACTT
IFI44L	XM_021096420.1	F	TTACGCCCCATCCAACTCTG	188	58
		R	TAGTGGATCCCTGACAACTGC
JMJD1C	XM_021073644.1	F	CAGCACCACAGCTCCAGTTA	198	58
		R	GGGGAGGCTGAAGATGTCTG
LNC_000111		F	CCAGACAGGTGGAGAGTTGT	159	58
		R	ATAGCACCGGTCAGGTTGTG
LNC_001595		F	CTGGTGGCCGGATTTTGAGA	182	58
		R	TCAACCCGCATGGTAACTCC
SLC4A1AP	XM_021088411.1	F	GACACTTTGGGATTGCTGCG	156	59
		R	CCCAGCCTTCTTCATTCGGT
ZHX2	XM_021088977.1	F	TGCAGGACACGTTAGGACAC	162	59
		R	GGGTCGGGTAAGGGAACTTG
IL12A	NM_213993.1	F	AATGTGTTCCCCTGGGTTCG	184	60
		R	GCTCCTGCCCAAACTGAGAT
IL12B	NM_214013.1	F	TCACGGACCAAATCTCAGCC	196	60
		R	GGGGTCTGCTCCATCATGTC
TNFSF10	XM_021068572.1	F	AGTAATAGCAAAGTGGAGAAGTCC	208	58
		R	CCCATATAGGTTATGGGAAACTTCA
CCL19	NM_001170516.1	F	GGCATCCTATGCAGTCACAC	161	59
		R	CTCGAATGAGCAGGTAGCGA
CCR7	NM_001001532.3	F	GCCATGAGCTTCTGCTACCT	215	60
		R	TAGGCGATGTTGAGCTGCTT
CD14	NM_001097445.2	F	AGAAGTGTAGCGAACGTGGG	186	60
		R	AGGGCTGTGGCTCCTTTAAC
IL1R2	XM_021085769.1	F	TCTGCTGGGGGAATAGGACA	199	60
		R	TCCGCCTAGAACCCTTCTCA
CSF3R	XM_021095951.1	F	GAGGCCGAGCTATTAACGACA	160	59
		R	TTCATGCACCATAAAGCAGGAC
CXCL14	NM_001244128.1	F	CACACCGATCAGGAGACGAG	192	60
		R	TTGTGATGGTGTCTGGAGCG
