# Supplementary material for: Analyses of long non-coding RNA and mRNA profiling in the spleen of diarrheic piglets caused by Clostridium perfringens type C
Source: PeerJ. 2018 Nov 30;6:e5997. doi: 10.7717/peerj.5997 (PMC6276591; doi:10.7717/peerj.5997)
Supplement: Supplemental Information 5 [file peerj-06-5997-s005.xlsx]

## Sheet: 10k
Chromosome	lncRNA_ID	lncRNA_Gene_ID	lncRNA_Gene_Symbol	lncRNA_Status	lncRNA_Start	lncRNA_End	lncRNA_Strand	mRNA_ID	mRNA_Gene_Id	mRNA_Gene_Symbol	mRNA_Gene_Description	mRNA_Start	mRNA_End	mRNA_Strand	Distance	Location
chr3	ALDBSSCT0000007358	ALDBSSCG0000004468	--	Annotated_lncRNA	135035044	135036145	-	ENSSSCT00000009448	ENSSSCG00000008636	--	--	135029578	135034074	-	969	upstream
chr3	ALDBSSCT0000007358	ALDBSSCG0000004468	--	Annotated_lncRNA	135035044	135036145	-	ENSSSCT00000027907	ENSSSCG00000026068	--	--	135023542	135028706	+	6337	downstream
chr10	ALDBSSCT0000001128	ALDBSSCG0000000701	--	Annotated_lncRNA	14062764	14065076	+	ENSSSCT00000011865	ENSSSCG00000010844	CHML	CHM like, Rab escort protein 2 [Source:HGNC Symbol;Acc:HGNC:1941]	14057448	14059955	+	2808	downstream
chr10	ALDBSSCT0000001128	ALDBSSCG0000000701	--	Annotated_lncRNA	14062764	14065076	+	ENSSSCT00000011864	ENSSSCG00000010843	--	--	14071143	14071848	-	6066	downstream
chr10	ALDBSSCT0000001128	ALDBSSCG0000000701	--	Annotated_lncRNA	14062764	14065076	+	ENSSSCT00000011863	ENSSSCG00000010842	--	--	14073173	14079400	-	8096	downstream
GL896420.2	LNC_000216	XLOC_012854	--	Novel_lncRNA	3	2834	-	ENSSSCT00000030182	ENSSSCG00000021541	--	--	5519	25071	-	2684	downstream
GL896416.1	LNC_000215	XLOC_012835	--	Novel_lncRNA	27212	31380	+	ENSSSCT00000027637	ENSSSCG00000025741	SNX20	sorting nexin 20 [Source:HGNC Symbol;Acc:HGNC:30390]	31732	39317	-	351	downstream
GL896412.1	LNC_000214	XLOC_012823	--	Novel_lncRNA	23781	24962	-	ENSSSCT00000026967	ENSSSCG00000020780	PRSS57	protease, serine 57 [Source:HGNC Symbol;Acc:HGNC:31397]	17775	22847	+	933	downstream
chr3	LNC_001349	XLOC_080221	--	Novel_lncRNA	72441666	72452450	-	ENSSSCT00000009085	ENSSSCG00000008296	NAT8	N-acetyltransferase 8 (putative) [Source:HGNC Symbol;Acc:HGNC:18069]	72452788	72453501	+	337	upstream
chr3	LNC_001349	XLOC_080221	--	Novel_lncRNA	72441666	72452450	-	ENSSSCT00000009086	ENSSSCG00000008297	TPRKB	TP53RK binding protein [Source:HGNC Symbol;Acc:HGNC:24259]	72437844	72445204	+	-3539	antisense
chr3	LNC_001349	XLOC_080221	--	Novel_lncRNA	72441666	72452450	-	ENSSSCT00000026747	ENSSSCG00000021579	--	--	72452689	72556364	-	238	downstream
chr10	ALDBSSCT0000001124	ALDBSSCG0000000697	--	Annotated_lncRNA	11930984	11931694	+	ENSSSCT00000026014	ENSSSCG00000027748	--	--	11933317	11968657	-	1622	downstream
chr10	ALDBSSCT0000001124	ALDBSSCG0000000697	--	Annotated_lncRNA	11930984	11931694	+	ENSSSCT00000011842	ENSSSCG00000010824	RAB3GAP2	RAB3 GTPase activating non-catalytic protein subunit 2 [Source:HGNC Symbol;Acc:HGNC:17168]	11838697	11930420	+	563	downstream
chr16	ALDBSSCT0000004957	ALDBSSCG0000003000	--	Annotated_lncRNA	42881401	42882711	-	ENSSSCT00000025662	ENSSSCG00000027763	--	--	42832716	42874957	+	6443	downstream
chr16	ALDBSSCT0000004957	ALDBSSCG0000003000	--	Annotated_lncRNA	42881401	42882711	-	ENSSSCT00000018443	ENSSSCG00000016935	SMIM15	small integral membrane protein 15 [Source:HGNC Symbol;Acc:HGNC:33861]	42880067	42880291	-	1109	upstream
chr3	LNC_001341	XLOC_079887	--	Novel_lncRNA	54360973	54366860	-	ENSSSCT00000030062	ENSSSCG00000023550	--	--	54348356	54351447	-	9525	upstream
chr3	LNC_001341	XLOC_079887	--	Novel_lncRNA	54360973	54366860	-	ENSSSCT00000008936	ENSSSCG00000008159	IL1RL1	interleukin 1 receptor like 1 [Source:HGNC Symbol;Acc:HGNC:5998]	54374030	54518149	-	7169	downstream
chr3	ALDBSSCT0000007171	ALDBSSCG0000004358	--	Annotated_lncRNA	54764201	54821564	-	ENSSSCT00000032991	ENSSSCG00000008162	IL1R1	interleukin 1 receptor type 1 [Source:HGNC Symbol;Acc:HGNC:5993]	54745413	54757579	-	6621	upstream
chr3	ALDBSSCT0000007171	ALDBSSCG0000004358	--	Annotated_lncRNA	54764201	54821564	-	ENSSSCT00000008939	ENSSSCG00000008162	IL1R1	interleukin 1 receptor type 1 [Source:HGNC Symbol;Acc:HGNC:5993]	54729098	54758580	-	5620	upstream
chr2	LNC_001181	XLOC_070890	--	Novel_lncRNA	137337490	137453082	+	ENSSSCT00000015580	ENSSSCG00000014259	--	--	137455203	137519461	+	2120	upstream
chr2	LNC_001182	XLOC_071018	--	Novel_lncRNA	140620948	140623744	+	ENSSSCT00000015610	ENSSSCG00000014287	SHROOM1	shroom family member 1 [Source:HGNC Symbol;Acc:HGNC:24084]	140617550	140626147	-	-2797	antisense
chr2	LNC_001183	XLOC_071018	--	Novel_lncRNA	140620950	140622385	+	ENSSSCT00000015610	ENSSSCG00000014287	SHROOM1	shroom family member 1 [Source:HGNC Symbol;Acc:HGNC:24084]	140617550	140626147	-	-1436	antisense
chr2	LNC_001184	XLOC_071018	--	Novel_lncRNA	140620950	140623744	+	ENSSSCT00000015610	ENSSSCG00000014287	SHROOM1	shroom family member 1 [Source:HGNC Symbol;Acc:HGNC:24084]	140617550	140626147	-	-2795	antisense
chr2	LNC_001185	XLOC_071131	--	Novel_lncRNA	143846050	143853495	+	ENSSSCT00000015641	ENSSSCG00000014316	TGFBI	transforming growth factor beta induced [Source:HGNC Symbol;Acc:HGNC:11771]	143856230	143907415	+	2734	upstream
chr18	ALDBSSCT0000005553	ALDBSSCG0000003361	--	Annotated_lncRNA	50987038	50991384	+	ENSSSCT00000027225	ENSSSCG00000026894	NFE2L3	nuclear factor, erythroid 2 like 3 [Source:HGNC Symbol;Acc:HGNC:7783]	50993767	51025144	-	2382	downstream
chr18	ALDBSSCT0000005553	ALDBSSCG0000003361	--	Annotated_lncRNA	50987038	50991384	+	ENSSSCT00000018192	ENSSSCG00000016711	CBX3	chromobox 3 [Source:HGNC Symbol;Acc:HGNC:1553]	50968278	50979509	-	7528	upstream
chr18	ALDBSSCT0000005552	ALDBSSCG0000003360	--	Annotated_lncRNA	50980582	50983672	+	ENSSSCT00000018192	ENSSSCG00000016711	CBX3	chromobox 3 [Source:HGNC Symbol;Acc:HGNC:1553]	50968278	50979509	-	1072	upstream
chr1	ALDBSSCT0000000727	ALDBSSCG0000000433	--	Annotated_lncRNA	54896429	54977064	-	ENSSSCT00000031744	ENSSSCG00000029872	--	--	54980595	54981362	+	3530	upstream
GL894399.1	LNC_000108	XLOC_006921	--	Novel_lncRNA	25822	32979	+	ENSSSCT00000005433	ENSSSCG00000004923	SLC51B	solute carrier family 51 beta subunit [Source:HGNC Symbol;Acc:HGNC:29956]	19207	23149	-	2672	upstream
GL894399.1	LNC_000108	XLOC_006921	--	Novel_lncRNA	25822	32979	+	ENSSSCT00000005434	ENSSSCG00000004924	RASL12	RAS like family 12 [Source:HGNC Symbol;Acc:HGNC:30289]	7203	17480	+	8341	downstream
GL894265.1	LNC_000102	XLOC_006576	--	Novel_lncRNA	9327	10639	+	ENSSSCT00000028135	ENSSSCG00000020798	--	--	7201	9183	+	143	downstream
GL894261.2	LNC_000101	XLOC_006559	--	Novel_lncRNA	45691	55963	-	ENSSSCT00000024049	ENSSSCG00000020878	HNRNPLL	heterogeneous nuclear ribonucleoprotein L like [Source:HGNC Symbol;Acc:HGNC:25127]	63343	101878	-	7379	downstream
GL894261.2	LNC_000101	XLOC_006559	--	Novel_lncRNA	45691	55963	-	ENSSSCT00000030162	ENSSSCG00000020878	HNRNPLL	heterogeneous nuclear ribonucleoprotein L like [Source:HGNC Symbol;Acc:HGNC:25127]	63343	91026	-	7379	downstream
GL894386.1	LNC_000107	XLOC_006907	--	Novel_lncRNA	8231	17327	+	ENSSSCT00000005431	ENSSSCG00000004921	ATP8B1	ATPase phospholipid transporting 8B1 [Source:HGNC Symbol;Acc:HGNC:3706]	8049	68628	-	-9097	antisense
GL894386.1	LNC_000106	XLOC_006907	--	Novel_lncRNA	8016	14938	+	ENSSSCT00000005431	ENSSSCG00000004921	ATP8B1	ATPase phospholipid transporting 8B1 [Source:HGNC Symbol;Acc:HGNC:3706]	8049	68628	-	-6890	antisense
GL894386.1	LNC_000105	XLOC_006907	--	Novel_lncRNA	7994	14938	+	ENSSSCT00000005431	ENSSSCG00000004921	ATP8B1	ATPase phospholipid transporting 8B1 [Source:HGNC Symbol;Acc:HGNC:3706]	8049	68628	-	-6890	antisense
GL894386.1	LNC_000104	XLOC_006907	--	Novel_lncRNA	7988	14938	+	ENSSSCT00000005431	ENSSSCG00000004921	ATP8B1	ATPase phospholipid transporting 8B1 [Source:HGNC Symbol;Acc:HGNC:3706]	8049	68628	-	-6890	antisense
chr9	LNC_001980	XLOC_118073	--	Novel_lncRNA	94138049	94244565	-	ENSSSCT00000029064	ENSSSCG00000029648	--	--	94245896	94431070	-	1330	downstream
chr9	LNC_001982	XLOC_118492	--	Novel_lncRNA	116634410	116646507	-	ENSSSCT00000022799	ENSSSCG00000024575	--	--	116624007	116629847	+	4562	downstream
chr9	LNC_001982	XLOC_118492	--	Novel_lncRNA	116634410	116646507	-	ENSSSCT00000016814	ENSSSCG00000015434	--	--	116645598	116679596	+	-910	antisense
chr9	LNC_001985	XLOC_118644	--	Novel_lncRNA	120073678	120106475	-	ENSSSCT00000030636	ENSSSCG00000030294	ZNF398	zinc finger protein 398 [Source:HGNC Symbol;Acc:HGNC:18373]	120110665	120135934	-	4189	downstream
chr9	LNC_001985	XLOC_118644	--	Novel_lncRNA	120073678	120106475	-	ENSSSCT00000024387	ENSSSCG00000030294	ZNF398	zinc finger protein 398 [Source:HGNC Symbol;Acc:HGNC:18373]	120110665	120138567	-	4189	downstream
chr2	ALDBSSCT0000006047	ALDBSSCG0000003702	--	Annotated_lncRNA	142447471	142462284	+	ENSSSCT00000015629	ENSSSCG00000014305	SAR1B	GTP-binding protein SAR1b [Source:UniProtKB/Swiss-Prot;Acc:Q5PYH3]	142463692	142489104	-	1407	downstream
chr2	ALDBSSCT0000006047	ALDBSSCG0000003702	--	Annotated_lncRNA	142447471	142462284	+	ENSSSCT00000015626	ENSSSCG00000014303	JADE2	jade family PHD finger 2 [Source:HGNC Symbol;Acc:HGNC:22984]	142398393	142446363	+	1107	downstream
chr2	ALDBSSCT0000006043	ALDBSSCG0000003699	--	Annotated_lncRNA	140258327	140267757	+	ENSSSCT00000015600	ENSSSCG00000014277	IRF1	Interferon regulatory factor 1 [Source:UniProtKB/Swiss-Prot;Acc:A0FIN4]	140229794	140252687	-	5639	upstream
chr2	ALDBSSCT0000006041	ALDBSSCG0000003697	--	Annotated_lncRNA	140090714	140094314	+	ENSSSCT00000015599	ENSSSCG00000014276	SLC22A5	solute carrier family 22 member 5 [Source:HGNC Symbol;Acc:HGNC:10969]	140064534	140089511	+	1202	downstream
chr3	LNC_001298	XLOC_077801	--	Novel_lncRNA	102930723	102938891	+	ENSSSCT00000032410	ENSSSCG00000028599	--	--	102939970	103176416	+	1078	upstream
chr3	LNC_001294	XLOC_077505	--	Novel_lncRNA	89645936	89690293	+	ENSSSCT00000009193	ENSSSCG00000008396	--	--	89688777	89884336	-	-1517	antisense
chr3	LNC_001296	XLOC_077724	--	Novel_lncRNA	98558490	98593317	+	ENSSSCT00000009226	ENSSSCG00000008425	--	--	98584618	98585025	-	-408	antisense
chr3	LNC_001297	XLOC_077755	--	Novel_lncRNA	100155754	100171254	+	ENSSSCT00000009243	ENSSSCG00000008442	TMEM247	transmembrane protein 247 [Source:HGNC Symbol;Acc:HGNC:42967]	100146888	100151357	-	4396	upstream
chr3	LNC_001297	XLOC_077755	--	Novel_lncRNA	100155754	100171254	+	ENSSSCT00000009245	ENSSSCG00000008443	EPAS1	endothelial PAS domain-containing protein 1 [Source:RefSeq peptide;Acc:NP_001090889]	100173612	100213334	+	2357	upstream
chr1	ALDBSSCT0000000658	ALDBSSCG0000000394	--	Annotated_lncRNA	17264640	17267867	-	ENSSSCT00000004520	ENSSSCG00000004089	RMND1	required for meiotic nuclear division 1 homolog [Source:HGNC Symbol;Acc:HGNC:21176]	17207038	17262700	+	1939	downstream
chr9	LNC_001966	XLOC_117185	--	Novel_lncRNA	46702102	46705449	-	ENSSSCT00000016421	ENSSSCG00000015055	--	--	46696699	46698729	-	3372	upstream
chr1	ALDBSSCT0000000657	ALDBSSCG0000000393	--	Annotated_lncRNA	16908387	16918832	-	ENSSSCT00000004517	ENSSSCG00000025777	ESR1	estrogen receptor [Source:RefSeq peptide;Acc:NP_999385]	16904677	16907255	-	1131	upstream
chr9	LNC_001965	XLOC_117081	--	Novel_lncRNA	40842139	40846984	-	ENSSSCT00000028051	ENSSSCG00000025606	--	--	40746503	40833540	-	8598	upstream
chr1	ALDBSSCT0000000099	ALDBSSCG0000000060	--	Annotated_lncRNA	40477406	40486303	+	ENSSSCT00000004664	ENSSSCG00000004219	CENPW	centromere protein W [Source:HGNC Symbol;Acc:HGNC:21488]	40459699	40468997	-	8408	upstream
chr1	ALDBSSCT0000000091	ALDBSSCG0000000054	--	Annotated_lncRNA	31521817	31524292	+	ENSSSCT00000004602	ENSSSCG00000004163	BCLAF1	BCL2 associated transcription factor 1 [Source:HGNC Symbol;Acc:HGNC:16863]	31490843	31513300	-	8516	upstream
chrX	ALDBSSCT0000011957	ALDBSSCG0000007277	--	Annotated_lncRNA	102841320	102859451	+	ENSSSCT00000013741	ENSSSCG00000012566	--	--	102863076	102878828	+	3624	upstream
chr7	LNC_001720	XLOC_102124	--	Novel_lncRNA	64084105	64089652	+	ENSSSCT00000002142	ENSSSCG00000001913	STOML1	stomatin like 1 [Source:HGNC Symbol;Acc:HGNC:14560]	64073607	64082630	+	1474	downstream
chr4	LNC_001403	XLOC_083419	--	Novel_lncRNA	88174149	88223318	+	ENSSSCT00000006880	ENSSSCG00000006280	--	--	88164739	88173831	-	317	upstream
chr3	ALDBSSCT0000007196	ALDBSSCG0000004375	--	Annotated_lncRNA	74946610	74947287	-	ENSSSCT00000009107	ENSSSCG00000008316	NAGK	N-acetylglucosamine kinase [Source:HGNC Symbol;Acc:HGNC:17174]	74949400	74959068	-	2112	downstream
chr3	ALDBSSCT0000007196	ALDBSSCG0000004375	--	Annotated_lncRNA	74946610	74947287	-	ENSSSCT00000009106	ENSSSCG00000008315	PAIP2B	poly(A) binding protein interacting protein 2B [Source:HGNC Symbol;Acc:HGNC:29200]	74881398	74940726	+	5883	downstream
chr6	ALDBSSCT0000009348	ALDBSSCG0000005702	--	Annotated_lncRNA	53304623	53305156	-	ENSSSCT00000027911	ENSSSCG00000029785	RPS9	ribosomal protein S9 [Source:HGNC Symbol;Acc:HGNC:10442]	53292339	53298246	+	6376	downstream
chr6	ALDBSSCT0000009348	ALDBSSCG0000005702	--	Annotated_lncRNA	53304623	53305156	-	ENSSSCT00000023496	ENSSSCG00000028802	--	--	53299112	53303684	-	938	upstream
chr15	LNC_000967	XLOC_057820	--	Novel_lncRNA	89296908	89332165	-	ENSSSCT00000017380	ENSSSCG00000015962	--	--	89251099	89292959	-	3948	upstream
chr15	LNC_000960	XLOC_057173	--	Novel_lncRNA	53450167	53460839	-	ENSSSCT00000017201	ENSSSCG00000015797	--	--	53434185	53445203	-	4963	upstream
chr15	LNC_000963	XLOC_057241	--	Novel_lncRNA	55498925	55506422	-	ENSSSCT00000032430	ENSSSCG00000026109	STAR	steroidogenic acute regulatory protein [Source:HGNC Symbol;Acc:HGNC:11359]	55502052	55509990	+	-4371	antisense
chr15	LNC_000963	XLOC_057241	--	Novel_lncRNA	55498925	55506422	-	ENSSSCT00000023044	ENSSSCG00000021898	ASH2L	set1/Ash2 histone methyltransferase complex subunit ASH2 [Source:RefSeq peptide;Acc:NP_001230497]	55512104	55552504	-	5681	downstream
chr15	LNC_000962	XLOC_057222	--	Novel_lncRNA	54739423	54758689	-	ENSSSCT00000017219	ENSSSCG00000015811	PLEKHA2	pleckstrin homology domain containing A2 [Source:HGNC Symbol;Acc:HGNC:14336]	54710265	54730497	+	8925	downstream
chr6	ALDBSSCT0000009340	ALDBSSCG0000005696	--	Annotated_lncRNA	51913729	51917512	-	ENSSSCT00000003599	ENSSSCG00000003240	--	--	51907469	51911185	-	2543	upstream
chr5	ENSSSCT00000000705	ENSSSCG00000000651	CLEC12B	Annotated_lncRNA	64741129	64747876	+	ENSSSCT00000000707	ENSSSCG00000000652	CLEC12A	C-type lectin domain family 12, member A [Source:RefSeq peptide;Acc:NP_001288598]	64755503	64769738	+	7626	upstream
chr5	ENSSSCT00000000705	ENSSSCG00000000651	CLEC12B	Annotated_lncRNA	64741129	64747876	+	ENSSSCT00000035148	ENSSSCG00000000652	CLEC12A	C-type lectin domain family 12, member A [Source:RefSeq peptide;Acc:NP_001288598]	64755375	64763960	+	7498	upstream
chr1	ALDBSSCT0000000477	ALDBSSCG0000000283	--	Annotated_lncRNA	261899243	262072206	+	ENSSSCT00000005828	ENSSSCG00000005291	TLE1	transducin like enhancer of split 1 [Source:HGNC Symbol;Acc:HGNC:11837]	261797375	261897606	-	1636	upstream
chr1	ALDBSSCT0000000477	ALDBSSCG0000000283	--	Annotated_lncRNA	261899243	262072206	+	ENSSSCT00000005829	ENSSSCG00000005292	--	--	262080694	262087247	+	8487	upstream
chr15	LNC_000969	XLOC_058127	--	Novel_lncRNA	104500530	104503535	-	ENSSSCT00000017461	ENSSSCG00000016036	WDR75	WD repeat domain 75 [Source:HGNC Symbol;Acc:HGNC:25725]	104503599	104547574	+	63	upstream
chr15	LNC_000968	XLOC_058127	--	Novel_lncRNA	104500530	104503222	-	ENSSSCT00000017461	ENSSSCG00000016036	WDR75	WD repeat domain 75 [Source:HGNC Symbol;Acc:HGNC:25725]	104503599	104547574	+	376	upstream
chr3	ALDBSSCT0000007327	ALDBSSCG0000004449	--	Annotated_lncRNA	121802236	121807330	-	ENSSSCT00000009392	ENSSSCG00000008582	FAM228A	family with sequence similarity 228 member A [Source:HGNC Symbol;Acc:HGNC:34418]	121775512	121800800	-	1435	upstream
chr6	LNC_001678	XLOC_099172	--	Novel_lncRNA	100900593	100904927	-	ENSSSCT00000028729	ENSSSCG00000029518	--	--	100883282	100897872	+	2720	downstream
chr7	ALDBSSCT0000010316	ALDBSSCG0000006274	--	Annotated_lncRNA	122222654	122224641	-	ENSSSCT00000002743	ENSSSCG00000002471	ISG12(A)	interferon, alpha-inducible protein 27 [Source:HGNC Symbol;Acc:HGNC:5397]	122215478	122220545	+	2108	downstream
chr7	ALDBSSCT0000010316	ALDBSSCG0000006274	--	Annotated_lncRNA	122222654	122224641	-	ENSSSCT00000002745	ENSSSCG00000002472	--	--	122228313	122229025	-	3671	downstream
chr9	ENSSSCT00000021723	ENSSSCG00000020128	7SK	Annotated_lncRNA	138727106	138727335	+	ENSSSCT00000016959	ENSSSCG00000015568	RNF2	ring finger protein 2 [Source:HGNC Symbol;Acc:HGNC:10061]	138670291	138732074	+	-230	sense_overlapping
chr6	ALDBSSCT0000009186	ALDBSSCG0000005594	--	Annotated_lncRNA	156399133	156413422	+	ENSSSCT00000004388	ENSSSCG00000003967	ZMYND12	zinc finger MYND-type containing 12 [Source:HGNC Symbol;Acc:HGNC:21192]	156366598	156392133	-	6999	upstream
chr6	ALDBSSCT0000009186	ALDBSSCG0000005594	--	Annotated_lncRNA	156399133	156413422	+	ENSSSCT00000004387	ENSSSCG00000003966	--	--	156392234	156398069	+	1063	downstream
chr14	LNC_000819	XLOC_048204	--	Novel_lncRNA	72324289	72324658	+	ENSSSCT00000011195	ENSSSCG00000010229	REEP3	receptor accessory protein 3 [Source:HGNC Symbol;Acc:HGNC:23711]	72331769	72356665	+	7110	upstream
chr14	LNC_000819	XLOC_048204	--	Novel_lncRNA	72324289	72324658	+	ENSSSCT00000024037	ENSSSCG00000010229	REEP3	receptor accessory protein 3 [Source:HGNC Symbol;Acc:HGNC:23711]	72331769	72357184	+	7110	upstream
chr1	ALDBSSCT0000000275	ALDBSSCG0000000161	--	Annotated_lncRNA	137503449	137507949	+	ENSSSCT00000005145	ENSSSCG00000004659	SLC12A1	solute carrier family 12 member 1 [Source:HGNC Symbol;Acc:HGNC:10910]	137510941	137599735	-	2991	downstream
chr1	ALDBSSCT0000000273	ALDBSSCG0000000161	--	Annotated_lncRNA	137493050	137507949	+	ENSSSCT00000005145	ENSSSCG00000004659	SLC12A1	solute carrier family 12 member 1 [Source:HGNC Symbol;Acc:HGNC:10910]	137510941	137599735	-	2991	downstream
chr1	ALDBSSCT0000000272	ALDBSSCG0000000161	--	Annotated_lncRNA	137493050	137507949	+	ENSSSCT00000005145	ENSSSCG00000004659	SLC12A1	solute carrier family 12 member 1 [Source:HGNC Symbol;Acc:HGNC:10910]	137510941	137599735	-	2991	downstream
chr14	ALDBSSCT0000003741	ALDBSSCG0000002240	--	Annotated_lncRNA	123490029	123491347	+	ENSSSCT00000011580	ENSSSCG00000010587	TRIM8	tripartite motif containing 8 [Source:HGNC Symbol;Acc:HGNC:15579]	123491890	123506692	+	542	upstream
chr14	LNC_000817	XLOC_048028	--	Novel_lncRNA	64167280	64174535	+	ENSSSCT00000011147	ENSSSCG00000010181	C1orf198	chromosome 1 open reading frame 198 [Source:HGNC Symbol;Acc:HGNC:25900]	64181766	64215461	+	7230	upstream
chr14	LNC_000816	XLOC_048028	--	Novel_lncRNA	64167280	64174535	+	ENSSSCT00000011147	ENSSSCG00000010181	C1orf198	chromosome 1 open reading frame 198 [Source:HGNC Symbol;Acc:HGNC:25900]	64181766	64215461	+	7230	upstream
chr6	LNC_001619	XLOC_095608	--	Novel_lncRNA	90740071	90743988	+	ENSSSCT00000022557	ENSSSCG00000024162	IMPA2	inositol monophosphatase 2 [Source:HGNC Symbol;Acc:HGNC:6051]	90749827	90770377	+	5838	upstream
chr5	ALDBSSCT0000008299	ALDBSSCG0000005041	--	Annotated_lncRNA	35847668	35852074	+	ENSSSCT00000000525	ENSSSCG00000000487	SLC35E3	solute carrier family 35 member E3 [Source:HGNC Symbol;Acc:HGNC:20864]	35833340	35837850	+	9817	downstream
chr13	ALDBSSCT0000002615	ALDBSSCG0000001588	--	Annotated_lncRNA	34300042	34344157	+	ENSSSCT00000012423	ENSSSCG00000011346	--	--	34290453	34293027	-	7014	upstream
chr13	ALDBSSCT0000002615	ALDBSSCG0000001588	--	Annotated_lncRNA	34300042	34344157	+	ENSSSCT00000012424	ENSSSCG00000011347	NME6	NME/NM23 nucleoside diphosphate kinase 6 [Source:HGNC Symbol;Acc:HGNC:20567]	34294969	34298953	-	1088	upstream
chr7	ALDBSSCT0000010089	ALDBSSCG0000006142	--	Annotated_lncRNA	24746290	24747141	-	ENSSSCT00000001334	ENSSSCG00000001231	SLA-1	-	24748105	24751642	-	963	downstream
chr7	ALDBSSCT0000010089	ALDBSSCG0000006142	--	Annotated_lncRNA	24746290	24747141	-	ENSSSCT00000036412	ENSSSCG00000001231	SLA-1	-	24748105	24751627	-	963	downstream
chr7	ALDBSSCT0000009749	ALDBSSCG0000005948	--	Annotated_lncRNA	44057391	44076573	+	ENSSSCT00000001884	ENSSSCG00000001688	--	--	44077255	44082602	+	681	upstream
chr7	ALDBSSCT0000009749	ALDBSSCG0000005948	--	Annotated_lncRNA	44057391	44076573	+	ENSSSCT00000001870	ENSSSCG00000001676	LRRC73	leucine rich repeat containing 73 [Source:HGNC Symbol;Acc:HGNC:21375]	44083009	44086372	-	6435	downstream
chr7	ALDBSSCT0000010081	ALDBSSCG0000006137	--	Annotated_lncRNA	22478372	22480123	-	ENSSSCT00000023495	ENSSSCG00000021863	--	--	22473137	22474072	+	4299	downstream
chr7	ALDBSSCT0000010080	ALDBSSCG0000006137	--	Annotated_lncRNA	22478372	22480123	-	ENSSSCT00000023495	ENSSSCG00000021863	--	--	22473137	22474072	+	4299	downstream
chr6	ALDBSSCT0000008819	ALDBSSCG0000005386	--	Annotated_lncRNA	41716505	41718359	+	ENSSSCT00000022792	ENSSSCG00000021946	ZNF383	zinc finger protein 383 [Source:HGNC Symbol;Acc:HGNC:18609]	41698568	41712514	+	3990	downstream
chr7	ALDBSSCT0000009747	ALDBSSCG0000005946	--	Annotated_lncRNA	42257185	42259807	+	ENSSSCT00000001806	ENSSSCG00000001624	--	--	42238900	42248961	+	8223	downstream
chr6	ALDBSSCT0000009292	ALDBSSCG0000005667	--	Annotated_lncRNA	39985065	39993892	-	ENSSSCT00000030862	ENSSSCG00000002879	GRAMD1A	GRAM domain containing 1A [Source:HGNC Symbol;Acc:HGNC:29305]	39995624	40019940	+	1731	upstream
chr6	ALDBSSCT0000009292	ALDBSSCG0000005667	--	Annotated_lncRNA	39985065	39993892	-	ENSSSCT00000003181	ENSSSCG00000002879	GRAMD1A	GRAM domain containing 1A [Source:HGNC Symbol;Acc:HGNC:29305]	39999335	40019940	+	5442	upstream
chr6	ALDBSSCT0000009290	ALDBSSCG0000005665	--	Annotated_lncRNA	39927868	39938862	-	ENSSSCT00000003182	ENSSSCG00000002880	ZNF792	zinc finger protein 792 [Source:HGNC Symbol;Acc:HGNC:24751]	39944882	39950787	-	6019	downstream
chr7	LNC_001725	XLOC_102399	--	Novel_lncRNA	81871013	81878349	+	ENSSSCT00000002296	ENSSSCG00000002053	TRDV2	T cell receptor delta variable 2 [Source:HGNC Symbol;Acc:HGNC:12263]	81884262	81884708	-	5912	downstream
chr4	ALDBSSCT0000007823	ALDBSSCG0000004738	--	Annotated_lncRNA	1319218	1324513	-	ENSSSCT00000007625	ENSSSCG00000006960	GLI4	GLI family zinc finger 4 [Source:HGNC Symbol;Acc:HGNC:4320]	1305245	1310216	-	9001	upstream
chr4	ALDBSSCT0000007823	ALDBSSCG0000004738	--	Annotated_lncRNA	1319218	1324513	-	ENSSSCT00000025104	ENSSSCG00000006960	GLI4	GLI family zinc finger 4 [Source:HGNC Symbol;Acc:HGNC:4320]	1305245	1310216	-	9001	upstream
chr1	ALDBSSCT0000000073	ALDBSSCG0000000042	--	Annotated_lncRNA	23666364	23683362	+	ENSSSCT00000004562	ENSSSCG00000004127	PLAGL1	PLAG1 like zinc finger 1 [Source:HGNC Symbol;Acc:HGNC:9046]	23687363	23707500	+	4000	upstream
chr1	ALDBSSCT0000000076	ALDBSSCG0000000044	--	Annotated_lncRNA	24419455	24421315	+	ENSSSCT00000004571	ENSSSCG00000004136	--	--	24300316	24415793	-	3661	upstream
chr12	ALDBSSCT0000002346	ALDBSSCG0000001420	--	Annotated_lncRNA	5466920	5467490	-	ENSSSCT00000018723	ENSSSCG00000017198	ACOX1	acyl-CoA oxidase 1 [Source:HGNC Symbol;Acc:HGNC:119]	5468062	5485843	-	571	downstream
chr12	ALDBSSCT0000002346	ALDBSSCG0000001420	--	Annotated_lncRNA	5466920	5467490	-	ENSSSCT00000018722	ENSSSCG00000017197	FBF1	Fas binding factor 1 [Source:HGNC Symbol;Acc:HGNC:24674]	5439937	5465726	-	1193	upstream
chr14	LNC_000839	XLOC_049719	--	Novel_lncRNA	152517887	152521660	+	ENSSSCT00000028770	ENSSSCG00000027003	--	--	152511838	152513301	+	4585	downstream
chr3	ALDBSSCT0000006732	ALDBSSCG0000004107	--	Annotated_lncRNA	56725274	56761776	+	ENSSSCT00000008955	ENSSSCG00000008177	--	--	56762717	57197007	+	940	upstream
chr6	LNC_001641	XLOC_096888	--	Novel_lncRNA	372815	378654	-	ENSSSCT00000002924	ENSSSCG00000002635	SPIRE2	spire type actin nucleation factor 2 [Source:HGNC Symbol;Acc:HGNC:30623]	285352	369193	-	3621	upstream
chr6	LNC_001641	XLOC_096888	--	Novel_lncRNA	372815	378654	-	ENSSSCT00000031647	ENSSSCG00000024687	FANCA	Fanconi anemia complementation group A [Source:HGNC Symbol;Acc:HGNC:3582]	378732	425579	+	77	upstream
chr5	LNC_001504	XLOC_088476	--	Novel_lncRNA	24097891	24099003	+	ENSSSCT00000000448	ENSSSCG00000000414	--	--	24099870	24105570	+	866	upstream
chr5	LNC_001504	XLOC_088476	--	Novel_lncRNA	24097891	24099003	+	ENSSSCT00000000453	ENSSSCG00000000419	--	--	24089392	24094285	+	3605	downstream
chr5	LNC_001507	XLOC_088770	--	Novel_lncRNA	35950016	35954735	+	ENSSSCT00000000526	ENSSSCG00000000488	MDM2	MDM2 proto-oncogene [Source:HGNC Symbol;Acc:HGNC:6973]	35889682	36061995	+	-4720	sense_overlapping
chr5	LNC_001507	XLOC_088770	--	Novel_lncRNA	35950016	35954735	+	ENSSSCT00000031897	ENSSSCG00000027797	--	--	35954423	35958343	-	-313	antisense
chr5	LNC_001500	XLOC_088132	--	Novel_lncRNA	13340533	13343665	+	ENSSSCT00000000176	ENSSSCG00000000167	RIC8B	RIC8 guanine nucleotide exchange factor B [Source:HGNC Symbol;Acc:HGNC:25555]	13327217	13432023	-	-3133	antisense
chr4	ALDBSSCT0000007825	ALDBSSCG0000004740	--	Annotated_lncRNA	1448002	1450982	-	ENSSSCT00000007624	ENSSSCG00000006959	ZNF696	zinc finger protein 696 [Source:HGNC Symbol;Acc:HGNC:25872]	1444379	1445383	-	2618	upstream
chr5	LNC_001502	XLOC_088247	--	Novel_lncRNA	17527315	17532401	+	ENSSSCT00000024631	ENSSSCG00000028060	SLC4A8	solute carrier family 4 member 8 [Source:HGNC Symbol;Acc:HGNC:11034]	17478545	17521947	+	5367	downstream
chr5	LNC_001503	XLOC_088344	--	Novel_lncRNA	21325061	21328864	+	ENSSSCT00000000339	ENSSSCG00000000318	OR6C4	olfactory receptor family 6 subfamily C member 4 [Source:HGNC Symbol;Acc:HGNC:19632]	21324271	21325200	-	-140	antisense
chr5	LNC_001503	XLOC_088344	--	Novel_lncRNA	21325061	21328864	+	ENSSSCT00000000373	ENSSSCG00000000351	--	--	21337563	21338498	-	8698	downstream
chr9	ALDBSSCT0000011356	ALDBSSCG0000006897	--	Annotated_lncRNA	137663830	137725093	+	ENSSSCT00000016954	ENSSSCG00000015564	TSEN15	tRNA splicing endonuclease subunit 15 [Source:HGNC Symbol;Acc:HGNC:16791]	137621561	137657224	+	6605	downstream
chr17	ENSSSCT00000035867	ENSSSCG00000007146	SIGLEC1	Annotated_lncRNA	36328314	36349591	+	ENSSSCT00000007817	ENSSSCG00000007145	ADAM33	ADAM metallopeptidase domain 33 [Source:HGNC Symbol;Acc:HGNC:15478]	36350319	36365013	+	727	upstream
chr13	ALDBSSCT0000003077	ALDBSSCG0000001847	--	Annotated_lncRNA	25222468	25223292	-	ENSSSCT00000012320	ENSSSCG00000011253	--	--	25224808	25285512	+	1515	upstream
chr5	LNC_001508	XLOC_088770	--	Novel_lncRNA	35953351	35959483	+	ENSSSCT00000000526	ENSSSCG00000000488	MDM2	MDM2 proto-oncogene [Source:HGNC Symbol;Acc:HGNC:6973]	35889682	36061995	+	-6133	sense_overlapping
chr5	LNC_001508	XLOC_088770	--	Novel_lncRNA	35953351	35959483	+	ENSSSCT00000031897	ENSSSCG00000027797	--	--	35954423	35958343	-	-3921	antisense
chr5	LNC_001509	XLOC_088811	--	Novel_lncRNA	37126001	37127529	+	ENSSSCT00000000541	ENSSSCG00000000502	CNOT2	CCR4-NOT transcription complex subunit 2 [Source:RefSeq peptide;Acc:NP_001230346]	37132086	37207068	+	4556	upstream
chr7	ALDBSSCT0000009903	ALDBSSCG0000006026	--	Annotated_lncRNA	105420591	105421475	+	ENSSSCT00000002654	ENSSSCG00000002387	GPATCH2L	G-patch domain containing 2 like [Source:HGNC Symbol;Acc:HGNC:20210]	105370887	105416373	+	4217	downstream
chr7	ALDBSSCT0000009901	ALDBSSCG0000006024	--	Annotated_lncRNA	105215654	105229985	+	ENSSSCT00000035269	ENSSSCG00000002385	TGFB3	transforming growth factor beta 3 [Source:HGNC Symbol;Acc:HGNC:11769]	105178640	105206982	-	8671	upstream
chr6	ALDBSSCT0000008753	ALDBSSCG0000005343	--	Annotated_lncRNA	17451781	17454219	+	ENSSSCT00000025301	ENSSSCG00000028723	CCDC102A	coiled-coil domain containing 102A [Source:HGNC Symbol;Acc:HGNC:28097]	17426723	17447550	-	4230	upstream
chr6	ALDBSSCT0000008753	ALDBSSCG0000005343	--	Annotated_lncRNA	17451781	17454219	+	ENSSSCT00000022417	ENSSSCG00000025503	ADGRG5	adhesion G protein-coupled receptor G5 [Source:HGNC Symbol;Acc:HGNC:19010]	17454851	17481206	+	631	upstream
chr5	ALDBSSCT0000008439	ALDBSSCG0000005125	--	Annotated_lncRNA	95094019	95434577	+	ENSSSCT00000000998	ENSSSCG00000000914	BTG1	B-cell translocation gene 1, anti-proliferative [Source:HGNC Symbol;Acc:HGNC:1130]	95088441	95091191	+	2827	downstream
chr2	ALDBSSCT0000005899	ALDBSSCG0000003598	--	Annotated_lncRNA	59878477	59880756	+	ENSSSCT00000028292	ENSSSCG00000013881	NXNL1	nucleoredoxin-like 1 [Source:HGNC Symbol;Acc:HGNC:25179]	59864886	59869393	-	9083	upstream
chr2	ALDBSSCT0000005899	ALDBSSCG0000003598	--	Annotated_lncRNA	59878477	59880756	+	ENSSSCT00000015167	ENSSSCG00000013881	NXNL1	nucleoredoxin-like 1 [Source:HGNC Symbol;Acc:HGNC:25179]	59864886	59869393	-	9083	upstream
chr2	ALDBSSCT0000005895	ALDBSSCG0000003595	--	Annotated_lncRNA	59264984	59273861	+	ENSSSCT00000015180	ENSSSCG00000013894	IL12RB1	interleukin 12 receptor subunit beta 1 [Source:HGNC Symbol;Acc:HGNC:5971]	59276712	59304741	+	2850	upstream
chr2	ALDBSSCT0000005895	ALDBSSCG0000003595	--	Annotated_lncRNA	59264984	59273861	+	ENSSSCT00000015181	ENSSSCG00000013895	--	--	59234170	59255713	+	9270	downstream
chr2	ALDBSSCT0000005896	ALDBSSCG0000003595	--	Annotated_lncRNA	59265009	59273861	+	ENSSSCT00000015180	ENSSSCG00000013894	IL12RB1	interleukin 12 receptor subunit beta 1 [Source:HGNC Symbol;Acc:HGNC:5971]	59276712	59304741	+	2850	upstream
chr2	ALDBSSCT0000005896	ALDBSSCG0000003595	--	Annotated_lncRNA	59265009	59273861	+	ENSSSCT00000015181	ENSSSCG00000013895	--	--	59234170	59255713	+	9295	downstream
chr2	ALDBSSCT0000005897	ALDBSSCG0000003596	--	Annotated_lncRNA	59273927	59276067	+	ENSSSCT00000015180	ENSSSCG00000013894	IL12RB1	interleukin 12 receptor subunit beta 1 [Source:HGNC Symbol;Acc:HGNC:5971]	59276712	59304741	+	644	upstream
chr2	ALDBSSCT0000005931	ALDBSSCG0000003622	--	Annotated_lncRNA	77605701	77611190	+	ENSSSCT00000027330	ENSSSCG00000030270	CNN2	calponin 2 [Source:HGNC Symbol;Acc:HGNC:2156]	77612062	77622362	+	871	upstream
chr2	ALDBSSCT0000005931	ALDBSSCG0000003622	--	Annotated_lncRNA	77605701	77611190	+	ENSSSCT00000032297	ENSSSCG00000027779	TMEM259	transmembrane protein 259 [Source:HGNC Symbol;Acc:HGNC:17039]	77594970	77604282	-	1418	upstream
chr2	ALDBSSCT0000005931	ALDBSSCG0000003622	--	Annotated_lncRNA	77605701	77611190	+	ENSSSCT00000026993	ENSSSCG00000029635	GRIN3B	glutamate ionotropic receptor NMDA type subunit 3B [Source:HGNC Symbol;Acc:HGNC:16768]	77585771	77595944	+	9756	downstream
chr13	LNC_000753	XLOC_044590	--	Novel_lncRNA	79591591	79601326	-	ENSSSCT00000012715	ENSSSCG00000011618	GATA2	GATA binding protein 2 [Source:HGNC Symbol;Acc:HGNC:4171]	79606188	79613715	-	4861	downstream
chrX	LNC_002001	XLOC_119718	--	Novel_lncRNA	15341127	15343718	+	ENSSSCT00000013294	ENSSSCG00000012153	RAI2	retinoic acid induced 2 [Source:HGNC Symbol;Acc:HGNC:9835]	15343815	15345410	-	96	downstream
chrX	LNC_002001	XLOC_119718	--	Novel_lncRNA	15341127	15343718	+	ENSSSCT00000034125	ENSSSCG00000012153	RAI2	retinoic acid induced 2 [Source:HGNC Symbol;Acc:HGNC:9835]	15345153	15373512	-	1434	downstream
chr12	LNC_000587	XLOC_035474	--	Novel_lncRNA	25352292	25353767	+	ENSSSCT00000032589	ENSSSCG00000030269	B4GALNT2	beta-1,4-N-acetyl-galactosaminyltransferase 2 [Source:HGNC Symbol;Acc:HGNC:24136]	25313095	25352176	-	115	upstream
chr12	LNC_000586	XLOC_035395	--	Novel_lncRNA	22518732	22523254	+	ENSSSCT00000019027	ENSSSCG00000017476	--	--	22502531	22515240	+	3491	downstream
chr12	LNC_000585	XLOC_035362	--	Novel_lncRNA	21842919	21845892	+	ENSSSCT00000028214	ENSSSCG00000028522	KRT10	keratin 10 [Source:HGNC Symbol;Acc:HGNC:6413]	21842637	21846419	-	-2974	antisense
chr12	LNC_000584	XLOC_035355	--	Novel_lncRNA	21799179	21811576	+	ENSSSCT00000019010	ENSSSCG00000017462	KRT27	keratin 27 [Source:RefSeq peptide;Acc:NP_001231551]	21806542	21811843	-	-5035	antisense
chr12	LNC_000584	XLOC_035355	--	Novel_lncRNA	21799179	21811576	+	ENSSSCT00000019011	ENSSSCG00000017463	KRT26	keratin 26 [Source:HGNC Symbol;Acc:HGNC:30840]	21793157	21799808	-	-630	antisense
chr12	LNC_000584	XLOC_035355	--	Novel_lncRNA	21799179	21811576	+	ENSSSCT00000019009	ENSSSCG00000017461	KRT28	keratin 28 [Source:HGNC Symbol;Acc:HGNC:30842]	21819560	21829827	-	7983	downstream
chr12	LNC_000583	XLOC_035303	--	Novel_lncRNA	20161061	20162356	+	ENSSSCT00000027385	ENSSSCG00000024536	RUNDC1	RUN domain containing 1 [Source:HGNC Symbol;Acc:HGNC:25418]	20166016	20173025	+	3659	upstream
chr12	LNC_000582	XLOC_035178	--	Novel_lncRNA	15060567	15068970	+	ENSSSCT00000018817	ENSSSCG00000017285	--	--	15065867	15073324	-	-3104	antisense
chr12	LNC_000582	XLOC_035178	--	Novel_lncRNA	15060567	15068970	+	ENSSSCT00000018816	ENSSSCG00000017284	GH1	somatotropin precursor [Source:RefSeq peptide;Acc:NP_999034]	15056359	15058095	+	2471	downstream
chr4	ALDBSSCT0000007700	ALDBSSCG0000004677	--	Annotated_lncRNA	122131377	122192138	+	ENSSSCT00000007500	ENSSSCG00000006848	SLC25A24	solute carrier family 25 member 24 [Source:HGNC Symbol;Acc:HGNC:20662]	122094476	122127835	+	3541	downstream
chr12	LNC_000580	XLOC_035034	--	Novel_lncRNA	12443403	12449371	+	ENSSSCT00000018792	ENSSSCG00000017263	GNA13	G protein subunit alpha 13 [Source:HGNC Symbol;Acc:HGNC:4381]	12403677	12443043	-	359	upstream
chr12	LNC_000588	XLOC_035474	--	Novel_lncRNA	25352292	25353767	+	ENSSSCT00000032589	ENSSSCG00000030269	B4GALNT2	beta-1,4-N-acetyl-galactosaminyltransferase 2 [Source:HGNC Symbol;Acc:HGNC:24136]	25313095	25352176	-	115	upstream
chr13	LNC_000741	XLOC_043518	--	Novel_lncRNA	39026016	39032973	-	ENSSSCT00000012538	ENSSSCG00000011457	IL17RB	interleukin 17 receptor B [Source:HGNC Symbol;Acc:HGNC:18015]	39018890	39033919	+	-6958	antisense
chr13	LNC_000741	XLOC_043518	--	Novel_lncRNA	39026016	39032973	-	ENSSSCT00000012539	ENSSSCG00000011458	ACTR8	ARP8 actin-related protein 8 homolog [Source:HGNC Symbol;Acc:HGNC:14672]	39034754	39057851	-	1780	downstream
chr13	LNC_000741	XLOC_043518	--	Novel_lncRNA	39026016	39032973	-	ENSSSCT00000036580	ENSSSCG00000011457	IL17RB	interleukin 17 receptor B [Source:HGNC Symbol;Acc:HGNC:18015]	39023658	39033040	+	-6958	antisense
chr13	LNC_000741	XLOC_043518	--	Novel_lncRNA	39026016	39032973	-	ENSSSCT00000012537	ENSSSCG00000011456	CHDH	choline dehydrogenase [Source:HGNC Symbol;Acc:HGNC:24288]	38984351	39019037	-	6978	upstream
chr13	LNC_000740	XLOC_043507	--	Novel_lncRNA	38201386	38205849	-	ENSSSCT00000012534	ENSSSCG00000011453	ITIH4	inter-alpha-trypsin inhibitor heavy chain family member 4 [Source:HGNC Symbol;Acc:HGNC:6169]	38197433	38208928	+	-4464	antisense
chr13	LNC_000740	XLOC_043507	--	Novel_lncRNA	38201386	38205849	-	ENSSSCT00000012535	ENSSSCG00000011454	SFMBT1	Scm-like with four mbt domains 1 [Source:HGNC Symbol;Acc:HGNC:20255]	38212236	38272256	-	6386	downstream
chr13	LNC_000740	XLOC_043507	--	Novel_lncRNA	38201386	38205849	-	ENSSSCT00000012533	ENSSSCG00000011452	--	--	38176170	38195116	+	6269	downstream
chr13	LNC_000743	XLOC_043588	--	Novel_lncRNA	43450504	43455163	-	ENSSSCT00000012550	ENSSSCG00000011468	--	--	43455340	43545275	-	176	downstream
chr13	LNC_000743	XLOC_043588	--	Novel_lncRNA	43450504	43455163	-	ENSSSCT00000012549	ENSSSCG00000011467	DENND6A	DENN domain containing 6A [Source:HGNC Symbol;Acc:HGNC:26635]	43385841	43444190	-	6313	upstream
chr13	LNC_000743	XLOC_043588	--	Novel_lncRNA	43450504	43455163	-	ENSSSCT00000012548	ENSSSCG00000011467	DENND6A	DENN domain containing 6A [Source:HGNC Symbol;Acc:HGNC:26635]	43385841	43444265	-	6238	upstream
chr13	LNC_000743	XLOC_043588	--	Novel_lncRNA	43450504	43455163	-	ENSSSCT00000026579	ENSSSCG00000011467	DENND6A	DENN domain containing 6A [Source:HGNC Symbol;Acc:HGNC:26635]	43385841	43444265	-	6238	upstream
chr13	LNC_000742	XLOC_043588	--	Novel_lncRNA	43450504	43455163	-	ENSSSCT00000012550	ENSSSCG00000011468	--	--	43455340	43545275	-	176	downstream
chr13	LNC_000742	XLOC_043588	--	Novel_lncRNA	43450504	43455163	-	ENSSSCT00000012549	ENSSSCG00000011467	DENND6A	DENN domain containing 6A [Source:HGNC Symbol;Acc:HGNC:26635]	43385841	43444190	-	6313	upstream
chr13	LNC_000742	XLOC_043588	--	Novel_lncRNA	43450504	43455163	-	ENSSSCT00000012548	ENSSSCG00000011467	DENND6A	DENN domain containing 6A [Source:HGNC Symbol;Acc:HGNC:26635]	43385841	43444265	-	6238	upstream
chr13	LNC_000742	XLOC_043588	--	Novel_lncRNA	43450504	43455163	-	ENSSSCT00000026579	ENSSSCG00000011467	DENND6A	DENN domain containing 6A [Source:HGNC Symbol;Acc:HGNC:26635]	43385841	43444265	-	6238	upstream
chr6	LNC_001610	XLOC_094200	--	Novel_lncRNA	40780563	40782880	+	ENSSSCT00000003215	ENSSSCG00000002910	ALKBH6	alkB homolog 6 [Source:HGNC Symbol;Acc:HGNC:28243]	40787609	40793022	-	4728	downstream
chr6	LNC_001610	XLOC_094200	--	Novel_lncRNA	40780563	40782880	+	ENSSSCT00000026621	ENSSSCG00000024907	SDHAF1	succinate dehydrogenase complex assembly factor 1 [Source:HGNC Symbol;Acc:HGNC:33867]	40777928	40779026	+	1536	downstream
chr6	LNC_001610	XLOC_094200	--	Novel_lncRNA	40780563	40782880	+	ENSSSCT00000003235	ENSSSCG00000002929	SYNE4	spectrin repeat containing nuclear envelope family member 4 [Source:HGNC Symbol;Acc:HGNC:26703]	40782928	40787208	-	47	downstream
chr6	LNC_001611	XLOC_094331	--	Novel_lncRNA	43276475	43278835	+	ENSSSCT00000027844	ENSSSCG00000026261	FBXO17	F-box protein 17 [Source:HGNC Symbol;Acc:HGNC:18754]	43281609	43284321	-	2773	downstream
chr6	LNC_001611	XLOC_094331	--	Novel_lncRNA	43276475	43278835	+	ENSSSCT00000003297	ENSSSCG00000002972	--	--	43266647	43276250	-	224	upstream
chr6	LNC_001611	XLOC_094331	--	Novel_lncRNA	43276475	43278835	+	ENSSSCT00000027105	ENSSSCG00000021333	--	--	43285919	43292702	-	7083	downstream
chr6	LNC_001612	XLOC_094353	--	Novel_lncRNA	44467768	44470352	+	ENSSSCT00000030673	ENSSSCG00000025448	SERTAD3	SERTA domain containing 3 [Source:HGNC Symbol;Acc:HGNC:17931]	44457026	44460712	-	7055	upstream
chr6	LNC_001612	XLOC_094353	--	Novel_lncRNA	44467768	44470352	+	ENSSSCT00000031402	ENSSSCG00000021067	BLVRB	biliverdin reductase B [Source:HGNC Symbol;Acc:HGNC:1063]	44463596	44476850	-	-2585	antisense
chr6	LNC_001613	XLOC_094460	--	Novel_lncRNA	46999152	47013583	+	ENSSSCT00000034700	ENSSSCG00000003078	CEACAM19	carcinoembryonic antigen related cell adhesion molecule 19 [Source:HGNC Symbol;Acc:HGNC:31951]	46996134	46998894	-	257	upstream
chr6	LNC_001614	XLOC_094485	--	Novel_lncRNA	47956865	47960807	+	ENSSSCT00000003442	ENSSSCG00000003103	FKRP	fukutin related protein [Source:HGNC Symbol;Acc:HGNC:17997]	47955176	47956663	+	201	downstream
chr6	LNC_001614	XLOC_094485	--	Novel_lncRNA	47956865	47960807	+	ENSSSCT00000003444	ENSSSCG00000003105	SLC1A5	solute carrier family 1 member 5 [Source:HGNC Symbol;Acc:HGNC:10943]	47968136	48032120	-	7328	downstream
chr6	LNC_001615	XLOC_094620	--	Novel_lncRNA	51730608	51732049	+	ENSSSCT00000032460	ENSSSCG00000022906	CH242-204P3.4	-	51715382	51723144	-	7463	upstream
chr6	LNC_001615	XLOC_094620	--	Novel_lncRNA	51730608	51732049	+	ENSSSCT00000034058	ENSSSCG00000022906	CH242-204P3.4	-	51715388	51723174	-	7433	upstream
chr14	ALDBSSCT0000003678	ALDBSSCG0000002200	--	Annotated_lncRNA	92302588	92338403	+	ENSSSCT00000011331	ENSSSCG00000010350	RGR	retinal G protein coupled receptor [Source:HGNC Symbol;Acc:HGNC:9990]	92290182	92300755	+	1832	downstream
chr6	LNC_001617	XLOC_095373	--	Novel_lncRNA	78289523	78302528	+	ENSSSCT00000029793	ENSSSCG00000003577	WASF2	WAS protein family, member 2 [Source:RefSeq peptide;Acc:NP_001245373]	78196658	78289075	-	447	upstream
chr6	LNC_001617	XLOC_095373	--	Novel_lncRNA	78289523	78302528	+	ENSSSCT00000003971	ENSSSCG00000003577	WASF2	WAS protein family, member 2 [Source:RefSeq peptide;Acc:NP_001245373]	78196522	78289075	-	447	upstream
chr7	ALDBSSCT0000009636	ALDBSSCG0000005880	--	Annotated_lncRNA	8178090	8190063	+	ENSSSCT00000030034	ENSSSCG00000028246	--	--	8171164	8171757	-	6332	upstream
chr3	ALDBSSCT0000006605	ALDBSSCG0000004037	--	Annotated_lncRNA	25776844	25779795	+	ENSSSCT00000024054	ENSSSCG00000021955	--	--	25784628	25787435	+	4832	upstream
chr5	ALDBSSCT0000008231	ALDBSSCG0000004997	--	Annotated_lncRNA	1531036	1534106	+	ENSSSCT00000000020	ENSSSCG00000000019	--	--	1512925	1526924	-	4111	upstream
chr13	ALDBSSCT0000003255	ALDBSSCG0000001964	--	Annotated_lncRNA	124256574	124257178	-	ENSSSCT00000012871	ENSSSCG00000011760	--	--	124263007	124290987	-	5828	downstream
chr13	ALDBSSCT0000003250	ALDBSSCG0000001959	--	Annotated_lncRNA	120032423	120034875	-	ENSSSCT00000012866	ENSSSCG00000011755	NCEH1	neutral cholesterol ester hydrolase 1 [Source:HGNC Symbol;Acc:HGNC:29260]	120035744	120052855	-	868	downstream
chr3	ALDBSSCT0000006544	ALDBSSCG0000004000	--	Annotated_lncRNA	6572301	6573154	+	ENSSSCT00000008358	ENSSSCG00000007618	--	--	6577306	6623651	+	4151	upstream
chr12	ALDBSSCT0000002387	ALDBSSCG0000001446	--	Annotated_lncRNA	18663528	18671417	-	ENSSSCT00000018877	ENSSSCG00000017341	C1QL1	complement C1q like 1 [Source:HGNC Symbol;Acc:HGNC:24182]	18655010	18661516	+	2011	downstream
chr12	ALDBSSCT0000002387	ALDBSSCG0000001446	--	Annotated_lncRNA	18663528	18671417	-	ENSSSCT00000018878	ENSSSCG00000017342	KIF18B	kinesin family member 18B [Source:HGNC Symbol;Acc:HGNC:27102]	18681057	18692401	+	9639	upstream
chr3	ALDBSSCT0000006548	ALDBSSCG0000004002	--	Annotated_lncRNA	8501117	8511984	+	ENSSSCT00000008420	ENSSSCG00000007679	IFT22	intraflagellar transport 22 [Source:HGNC Symbol;Acc:HGNC:21895]	8491985	8496112	+	5004	downstream
chrX	ENSSSCT00000034731	ENSSSCG00000030806	CH242-445E7.1	Annotated_lncRNA	114048060	114051191	+	ENSSSCT00000013810	ENSSSCG00000012629	--	--	114059874	114061384	-	8682	downstream
chr9	ALDBSSCT0000011567	ALDBSSCG0000007022	--	Annotated_lncRNA	63784783	63785630	-	ENSSSCT00000016621	ENSSSCG00000015252	SNX19	sorting nexin 19 [Source:HGNC Symbol;Acc:HGNC:21532]	63790485	63829935	-	4854	downstream
chr7	LNC_001769	XLOC_104773	--	Novel_lncRNA	63600111	63614932	-	ENSSSCT00000023820	ENSSSCG00000022812	--	--	63621165	63652662	-	6232	downstream
chr7	LNC_001769	XLOC_104773	--	Novel_lncRNA	63600111	63614932	-	ENSSSCT00000002133	ENSSSCG00000001904	CLK3	CDC like kinase 3 [Source:HGNC Symbol;Acc:HGNC:2071]	63583921	63598452	-	1658	upstream
chr7	LNC_001765	XLOC_104394	--	Novel_lncRNA	47151696	47160871	-	ENSSSCT00000001916	ENSSSCG00000022542	--	--	47170752	47171717	+	9880	upstream
chr7	LNC_001767	XLOC_104649	--	Novel_lncRNA	59039654	59042238	-	ENSSSCT00000025421	ENSSSCG00000023794	--	--	59043062	59043553	+	823	upstream
chr7	LNC_001760	XLOC_104217	--	Novel_lncRNA	42502862	42505590	-	ENSSSCT00000034619	ENSSSCG00000026752	CCND3	cyclin D3 [Source:HGNC Symbol;Acc:HGNC:1585]	42493149	42493376	-	9485	upstream
chr7	LNC_001760	XLOC_104217	--	Novel_lncRNA	42502862	42505590	-	ENSSSCT00000031143	ENSSSCG00000026752	CCND3	cyclin D3 [Source:HGNC Symbol;Acc:HGNC:1585]	42486007	42493235	-	9626	upstream
chr16	ALDBSSCT0000004763	ALDBSSCG0000002900	--	Annotated_lncRNA	40110437	40111581	+	ENSSSCT00000018433	ENSSSCG00000016926	GAPT	GRB2-binding adaptor protein, transmembrane [Source:HGNC Symbol;Acc:HGNC:26588]	40115255	40115716	+	3673	upstream
chr3	ALDBSSCT0000007018	ALDBSSCG0000004267	--	Annotated_lncRNA	10914326	10921517	-	ENSSSCT00000032354	ENSSSCG00000025858	--	--	10929442	10935871	-	7924	downstream
chr3	ALDBSSCT0000007016	ALDBSSCG0000004265	--	Annotated_lncRNA	10575565	10578193	-	ENSSSCT00000008451	ENSSSCG00000007708	BCL7B	BCL tumor suppressor 7B [Source:HGNC Symbol;Acc:HGNC:1005]	10550014	10568958	-	6606	upstream
chr3	ALDBSSCT0000007016	ALDBSSCG0000004265	--	Annotated_lncRNA	10575565	10578193	-	ENSSSCT00000008452	ENSSSCG00000007709	TBL2	transducin beta like 2 [Source:HGNC Symbol;Acc:HGNC:11586]	10587095	10592168	-	8901	downstream
chr6	ALDBSSCT0000008954	ALDBSSCG0000005482	--	Annotated_lncRNA	81651843	81656743	+	ENSSSCT00000028948	ENSSSCG00000023946	--	--	81644269	81646622	-	5220	upstream
chrX	ENSSSCT00000035641	ENSSSCG00000030934	CH242-156O11.3	Annotated_lncRNA	6807001	6811133	+	ENSSSCT00000034091	ENSSSCG00000012104	SHROOM2	shroom family member 2 [Source:HGNC Symbol;Acc:HGNC:630]	6595889	6801781	+	5219	downstream
chrX	ENSSSCT00000035641	ENSSSCG00000030934	CH242-156O11.3	Annotated_lncRNA	6807001	6811133	+	ENSSSCT00000013239	ENSSSCG00000012104	SHROOM2	shroom family member 2 [Source:HGNC Symbol;Acc:HGNC:630]	6723480	6801781	+	5219	downstream
chr1	LNC_000368	XLOC_022831	--	Novel_lncRNA	62576247	62588276	-	ENSSSCT00000004757	ENSSSCG00000004303	--	--	62592225	62632442	+	3948	upstream
chr18	ALDBSSCT0000005704	ALDBSSCG0000003464	--	Annotated_lncRNA	42069535	42170220	-	ENSSSCT00000018140	ENSSSCG00000016661	SEPT7	septin 7 [Source:HGNC Symbol;Acc:HGNC:1717]	41967526	42068931	-	603	upstream
chr1	LNC_000365	XLOC_022370	--	Novel_lncRNA	32043287	32044791	-	ENSSSCT00000004605	ENSSSCG00000004166	AHI1	Abelson helper integration site 1 [Source:HGNC Symbol;Acc:HGNC:21575]	32049106	32243731	+	4314	upstream
chr1	LNC_000364	XLOC_022248	--	Novel_lncRNA	28504915	28508231	-	ENSSSCT00000004580	ENSSSCG00000004144	HECA	hdc homolog, cell cycle regulator [Source:HGNC Symbol;Acc:HGNC:21041]	28516798	28531132	-	8566	downstream
chr12	LNC_000569	XLOC_034725	--	Novel_lncRNA	894235	900503	+	ENSSSCT00000030531	ENSSSCG00000029553	CCDC57	coiled-coil domain containing 57 [Source:HGNC Symbol;Acc:HGNC:27564]	902572	932126	-	2068	downstream
chr12	LNC_000568	XLOC_034725	--	Novel_lncRNA	888536	900503	+	ENSSSCT00000030531	ENSSSCG00000029553	CCDC57	coiled-coil domain containing 57 [Source:HGNC Symbol;Acc:HGNC:27564]	902572	932126	-	2068	downstream
chr3	ALDBSSCT0000007128	ALDBSSCG0000004336	--	Annotated_lncRNA	44332952	44344012	-	ENSSSCT00000008852	ENSSSCG00000008079	FAM120A	family with sequence similarity 120A [Source:HGNC Symbol;Acc:HGNC:13247]	44241917	44330948	+	2003	downstream
chr3	ALDBSSCT0000007129	ALDBSSCG0000004336	--	Annotated_lncRNA	44332952	44344013	-	ENSSSCT00000008852	ENSSSCG00000008079	FAM120A	family with sequence similarity 120A [Source:HGNC Symbol;Acc:HGNC:13247]	44241917	44330948	+	2003	downstream
chr18	ALDBSSCT0000005630	ALDBSSCG0000003411	--	Annotated_lncRNA	5727384	5754574	-	ENSSSCT00000017892	ENSSSCG00000016431	GALNTL5	polypeptide N-acetylgalactosaminyltransferase-like 5 [Source:HGNC Symbol;Acc:HGNC:21725]	5661558	5723817	-	3566	upstream
chr18	ALDBSSCT0000005632	ALDBSSCG0000003412	--	Annotated_lncRNA	6243034	6244027	-	ENSSSCT00000017899	ENSSSCG00000016438	NUB1	negative regulator of ubiquitin like proteins 1 [Source:HGNC Symbol;Acc:HGNC:17623]	6247053	6274899	+	3025	upstream
chr11	LNC_000565	XLOC_034648	--	Novel_lncRNA	86140451	86141986	-	ENSSSCT00000010475	ENSSSCG00000009556	CUL4A	cullin 4A [Source:HGNC Symbol;Acc:HGNC:2554]	86146355	86178783	-	4368	downstream
chr11	LNC_000565	XLOC_034648	--	Novel_lncRNA	86140451	86141986	-	ENSSSCT00000010474	ENSSSCG00000009555	LAMP1	lysosomal-associated membrane protein 1 [Source:HGNC Symbol;Acc:HGNC:6499]	86117929	86134887	-	5563	upstream
chr18	ALDBSSCT0000005635	ALDBSSCG0000003414	--	Annotated_lncRNA	7111414	7112174	-	ENSSSCT00000017924	ENSSSCG00000016461	--	--	7099521	7110835	-	578	upstream
chr18	ALDBSSCT0000005635	ALDBSSCG0000003414	--	Annotated_lncRNA	7111414	7112174	-	ENSSSCT00000017931	ENSSSCG00000016468	--	--	7105769	7107353	+	4060	downstream
chr12	LNC_000567	XLOC_034725	--	Novel_lncRNA	888492	900503	+	ENSSSCT00000030531	ENSSSCG00000029553	CCDC57	coiled-coil domain containing 57 [Source:HGNC Symbol;Acc:HGNC:27564]	902572	932126	-	2068	downstream
chr18	ALDBSSCT0000005637	ALDBSSCG0000003416	--	Annotated_lncRNA	7715212	7715795	-	ENSSSCT00000029092	ENSSSCG00000016475	--	--	7722752	7744123	-	6956	downstream
chr18	ALDBSSCT0000005637	ALDBSSCG0000003416	--	Annotated_lncRNA	7715212	7715795	-	ENSSSCT00000025084	ENSSSCG00000016475	--	--	7722752	7730334	-	6956	downstream
chr18	ALDBSSCT0000005637	ALDBSSCG0000003416	--	Annotated_lncRNA	7715212	7715795	-	ENSSSCT00000017939	ENSSSCG00000016475	--	--	7724092	7744165	-	8296	downstream
chr16	ALDBSSCT0000004812	ALDBSSCG0000002924	--	Annotated_lncRNA	56277315	56331424	+	ENSSSCT00000018508	ENSSSCG00000016996	--	--	56338239	56353011	+	6814	upstream
chr13	ALDBSSCT0000002721	ALDBSSCG0000001648	--	Annotated_lncRNA	90525973	90550185	+	ENSSSCT00000012782	ENSSSCG00000011676	--	--	90496249	90523075	+	2897	downstream
chr3	LNC_001357	XLOC_080625	--	Novel_lncRNA	90413698	90435536	-	ENSSSCT00000009196	ENSSSCG00000008399	--	--	90413973	90422822	+	-8850	antisense
chr3	LNC_001351	XLOC_080257	--	Novel_lncRNA	73327809	73426078	-	ENSSSCT00000026655	ENSSSCG00000025581	--	--	73426179	73435070	-	100	downstream
chr3	LNC_001353	XLOC_080419	--	Novel_lncRNA	81241123	81241708	-	ENSSSCT00000022299	ENSSSCG00000008363	AFTPH	aftiphilin [Source:HGNC Symbol;Acc:HGNC:25951]	81192659	81231820	-	9302	upstream
chr3	LNC_001353	XLOC_080419	--	Novel_lncRNA	81241123	81241708	-	ENSSSCT00000009157	ENSSSCG00000008363	AFTPH	aftiphilin [Source:HGNC Symbol;Acc:HGNC:25951]	81193680	81231820	-	9302	upstream
chr2	ALDBSSCT0000006127	ALDBSSCG0000003743	--	Annotated_lncRNA	2747074	2749524	-	ENSSSCT00000014076	ENSSSCG00000012878	IGHMBP2	immunoglobulin mu binding protein 2 [Source:HGNC Symbol;Acc:HGNC:5542]	2751383	2774853	-	1858	downstream
chr2	LNC_001198	XLOC_071277	--	Novel_lncRNA	147811270	147814013	+	ENSSSCT00000023612	ENSSSCG00000021989	PURA	purine rich element binding protein A [Source:HGNC Symbol;Acc:HGNC:9701]	147800960	147801928	+	9341	downstream
chr2	LNC_001195	XLOC_071133	--	Novel_lncRNA	144745622	144754285	+	ENSSSCT00000025357	ENSSSCG00000023742	--	--	144736355	144736552	-	9069	upstream
chr2	ALDBSSCT0000006049	ALDBSSCG0000003703	--	Annotated_lncRNA	142664365	142665527	+	ENSSSCT00000032271	ENSSSCG00000030393	C5orf24	chromosome 5 open reading frame 24 [Source:HGNC Symbol;Acc:HGNC:26746]	142660878	142661444	+	2920	downstream
chr2	LNC_001193	XLOC_071133	--	Novel_lncRNA	144691821	144732198	+	ENSSSCT00000025357	ENSSSCG00000023742	--	--	144736355	144736552	-	4156	downstream
chr2	LNC_001192	XLOC_071133	--	Novel_lncRNA	144691558	144754285	+	ENSSSCT00000025357	ENSSSCG00000023742	--	--	144736355	144736552	-	-198	antisense
chr2	LNC_001191	XLOC_071133	--	Novel_lncRNA	144690203	144732198	+	ENSSSCT00000025357	ENSSSCG00000023742	--	--	144736355	144736552	-	4156	downstream
chr9	ALDBSSCT0000011596	ALDBSSCG0000007041	--	Annotated_lncRNA	80808512	80820736	-	ENSSSCT00000016698	ENSSSCG00000015325	BET1	Bet1 golgi vesicular membrane trafficking protein [Source:HGNC Symbol;Acc:HGNC:14562]	80823453	80833936	-	2716	downstream
chr14	ALDBSSCT0000003928	ALDBSSCG0000002363	--	Annotated_lncRNA	58486483	58496124	-	ENSSSCT00000011105	ENSSSCG00000010143	MTR	5-methyltetrahydrofolate-homocysteine methyltransferase [Source:HGNC Symbol;Acc:HGNC:7468]	58497683	58618862	-	1558	downstream
chr4	ALDBSSCT0000008132	ALDBSSCG0000004935	--	Annotated_lncRNA	121137841	121145827	-	ENSSSCT00000007481	ENSSSCG00000006830	PSMA5	proteasome subunit alpha type-5 [Source:RefSeq peptide;Acc:NP_001138373]	121153782	121226070	+	7954	upstream
chr8	LNC_001820	XLOC_108236	--	Novel_lncRNA	112150734	112153869	+	ENSSSCT00000024667	ENSSSCG00000023174	USP53	ubiquitin specific peptidase 53 [Source:HGNC Symbol;Acc:HGNC:29255]	112155302	112193360	-	1432	downstream
chr18	ALDBSSCT0000005568	ALDBSSCG0000003370	--	Annotated_lncRNA	53406194	53422408	+	ENSSSCT00000018201	ENSSSCG00000016720	PGAM2	phosphoglycerate mutase 2 [Source:HGNC Symbol;Acc:HGNC:8889]	53423634	53425884	+	1225	upstream
chr18	ALDBSSCT0000005568	ALDBSSCG0000003370	--	Annotated_lncRNA	53406194	53422408	+	ENSSSCT00000018202	ENSSSCG00000016721	DBNL	drebrin like [Source:HGNC Symbol;Acc:HGNC:2696]	53426424	53438727	-	4015	downstream
chr10	ALDBSSCT0000001623	ALDBSSCG0000000984	--	Annotated_lncRNA	75572233	75573245	-	ENSSSCT00000023947	ENSSSCG00000028602	--	--	75547614	75565717	-	6515	upstream
GL895527.2	LNC_000173	XLOC_010163	--	Novel_lncRNA	8292	10405	+	ENSSSCT00000030992	ENSSSCG00000025098	--	--	229	3676	-	4615	upstream
GL895527.2	LNC_000173	XLOC_010163	--	Novel_lncRNA	8292	10405	+	ENSSSCT00000031625	ENSSSCG00000025090	--	--	15105	22255	-	4699	downstream
chr6	LNC_001682	XLOC_099697	--	Novel_lncRNA	131467759	131542522	-	ENSSSCT00000004190	ENSSSCG00000003787	ZRANB2	zinc finger RANBP2-type containing 2 [Source:HGNC Symbol;Acc:HGNC:13058]	131542884	131563408	+	361	upstream
chr2	ALDBSSCT0000006055	ALDBSSCG0000003709	--	Annotated_lncRNA	146225357	146226000	+	ENSSSCT00000015665	ENSSSCG00000014338	HSPA9	heat shock protein family A (Hsp70) member 9 [Source:HGNC Symbol;Acc:HGNC:5244]	146229842	146246784	-	3841	downstream
chr2	ALDBSSCT0000006055	ALDBSSCG0000003709	--	Annotated_lncRNA	146225357	146226000	+	ENSSSCT00000015664	ENSSSCG00000014337	ETF1	eukaryotic translation termination factor 1 [Source:HGNC Symbol;Acc:HGNC:3477]	146186428	146219318	-	6038	upstream
chr2	ALDBSSCT0000006054	ALDBSSCG0000003708	--	Annotated_lncRNA	146175633	146178456	+	ENSSSCT00000015664	ENSSSCG00000014337	ETF1	eukaryotic translation termination factor 1 [Source:HGNC Symbol;Acc:HGNC:3477]	146186428	146219318	-	7971	downstream
chr2	ALDBSSCT0000006057	ALDBSSCG0000003710	--	Annotated_lncRNA	147016292	147018606	+	ENSSSCT00000015671	ENSSSCG00000014343	--	--	147027901	147059819	+	9294	upstream
chr2	ALDBSSCT0000006050	ALDBSSCG0000003704	--	Annotated_lncRNA	143690799	143695335	+	ENSSSCT00000015638	ENSSSCG00000014314	--	--	143696463	143768753	+	1127	upstream
chr3	LNC_001283	XLOC_076999	--	Novel_lncRNA	62174981	62192942	+	ENSSSCT00000027775	ENSSSCG00000030435	--	--	62195034	62215487	-	2091	downstream
chr3	LNC_001282	XLOC_076999	--	Novel_lncRNA	62174981	62192942	+	ENSSSCT00000027775	ENSSSCG00000030435	--	--	62195034	62215487	-	2091	downstream
chr3	LNC_001281	XLOC_076979	--	Novel_lncRNA	61699789	61722534	+	ENSSSCT00000025660	ENSSSCG00000025805	--	--	61722713	61749563	+	178	upstream
chr3	LNC_001284	XLOC_076999	--	Novel_lncRNA	62188748	62192942	+	ENSSSCT00000027775	ENSSSCG00000030435	--	--	62195034	62215487	-	2091	downstream
chr3	LNC_001289	XLOC_077196	--	Novel_lncRNA	77035933	77041373	+	ENSSSCT00000009138	ENSSSCG00000008344	ARHGAP25	Rho GTPase activating protein 25 [Source:HGNC Symbol;Acc:HGNC:28951]	77045236	77096424	+	3862	upstream
chr5	ALDBSSCT0000008419	ALDBSSCG0000005110	--	Annotated_lncRNA	89679119	89681592	+	ENSSSCT00000000971	ENSSSCG00000000887	--	--	89642205	89669550	-	9568	upstream
chr9	LNC_001978	XLOC_117899	--	Novel_lncRNA	83167574	83189820	-	ENSSSCT00000016709	ENSSSCG00000015336	SLC25A13	solute carrier family 25 member 13 [Source:HGNC Symbol;Acc:HGNC:10983]	83194775	83350961	-	4954	downstream
chr9	LNC_001978	XLOC_117899	--	Novel_lncRNA	83167574	83189820	-	ENSSSCT00000016708	ENSSSCG00000015335	DYNC1I1	dynein cytoplasmic 1 intermediate chain 1 [Source:HGNC Symbol;Acc:HGNC:2963]	82792692	83172175	+	-4602	antisense
chr11	ALDBSSCT0000001712	ALDBSSCG0000001032	--	Annotated_lncRNA	18208886	18210956	+	ENSSSCT00000010289	ENSSSCG00000009390	SPRYD7	SPRY domain containing 7 [Source:HGNC Symbol;Acc:HGNC:14297]	18186983	18208062	+	823	downstream
chr11	ALDBSSCT0000001711	ALDBSSCG0000001032	--	Annotated_lncRNA	18208881	18210956	+	ENSSSCT00000010289	ENSSSCG00000009390	SPRYD7	SPRY domain containing 7 [Source:HGNC Symbol;Acc:HGNC:14297]	18186983	18208062	+	818	downstream
chr10	ALDBSSCT0000001248	ALDBSSCG0000000756	--	Annotated_lncRNA	47712356	47727977	+	ENSSSCT00000030761	ENSSSCG00000023200	--	--	47710052	47710749	+	1606	downstream
chr9	LNC_001972	XLOC_117440	--	Novel_lncRNA	59030704	59039488	-	ENSSSCT00000023210	ENSSSCG00000030017	FOXRED1	FAD dependent oxidoreductase domain containing 1 [Source:HGNC Symbol;Acc:HGNC:26927]	59028736	59036373	+	-5670	antisense
chr9	LNC_001972	XLOC_117440	--	Novel_lncRNA	59030704	59039488	-	ENSSSCT00000016593	ENSSSCG00000015227	SRPRA	SRP receptor alpha subunit [Source:HGNC Symbol;Acc:HGNC:11307]	58968922	59028437	-	2266	upstream
chr17	LNC_001045	XLOC_062376	--	Novel_lncRNA	5347850	5350947	+	ENSSSCT00000007651	ENSSSCG00000006983	CNOT7	CCR4-NOT transcription complex subunit 7 [Source:HGNC Symbol;Acc:HGNC:14101]	5328729	5343368	-	4481	upstream
chr17	LNC_001045	XLOC_062376	--	Novel_lncRNA	5347850	5350947	+	ENSSSCT00000007648	ENSSSCG00000006983	CNOT7	CCR4-NOT transcription complex subunit 7 [Source:HGNC Symbol;Acc:HGNC:14101]	5328135	5343368	-	4481	upstream
GL892334.1	LNC_000002	XLOC_000251	--	Novel_lncRNA	13070	19681	-	ENSSSCT00000025033	ENSSSCG00000022771	--	--	10448	23051	+	-6612	antisense
GL892334.1	LNC_000003	XLOC_000251	--	Novel_lncRNA	17188	19678	-	ENSSSCT00000025033	ENSSSCG00000022771	--	--	10448	23051	+	-2491	antisense
GL892404.2	LNC_000006	XLOC_000532	--	Novel_lncRNA	31377	49597	+	ENSSSCT00000026614	ENSSSCG00000029257	-	Sus scrofa acrosin inhibitor (LOC396905), mRNA. [Source:RefSeq mRNA;Acc:NM_213877]	37682	41138	-	-3457	antisense
GL892381.1	LNC_000004	XLOC_000417	--	Novel_lncRNA	80300	80790	-	ENSSSCT00000026843	ENSSSCG00000023576	--	--	13876	71487	-	8812	upstream
chr10	ALDBSSCT0000001394	ALDBSSCG0000000849	--	Annotated_lncRNA	10794521	11028123	-	ENSSSCT00000011834	ENSSSCG00000010817	LYPLAL1	lysophospholipase like 1 [Source:HGNC Symbol;Acc:HGNC:20440]	11029409	11060723	+	1285	upstream
chr10	ALDBSSCT0000001398	ALDBSSCG0000000851	--	Annotated_lncRNA	12249038	12249722	-	ENSSSCT00000011844	ENSSSCG00000010826	MARC2	mitochondrial amidoxime reducing component 2 [Source:HGNC Symbol;Acc:HGNC:26064]	12259545	12288272	-	9822	downstream
chr3	ALDBSSCT0000007057	ALDBSSCG0000004290	--	Annotated_lncRNA	22227017	22233489	-	ENSSSCT00000032231	ENSSSCG00000026077	--	--	22202581	22221915	+	5101	downstream
chr3	ALDBSSCT0000007166	ALDBSSCG0000004354	--	Annotated_lncRNA	51850718	51853752	-	ENSSSCT00000024727	ENSSSCG00000024636	TGFBRAP1	transforming growth factor beta receptor associated protein 1 [Source:HGNC Symbol;Acc:HGNC:16836]	51797666	51848992	-	1725	upstream
chr3	ALDBSSCT0000007166	ALDBSSCG0000004354	--	Annotated_lncRNA	51850718	51853752	-	ENSSSCT00000023410	ENSSSCG00000029999	--	--	51854371	51857245	+	618	upstream
chr6	ALDBSSCT0000009355	ALDBSSCG0000005708	--	Annotated_lncRNA	56227120	56231887	-	ENSSSCT00000025504	ENSSSCG00000027774	ZFP28	ZFP28 zinc finger protein [Source:HGNC Symbol;Acc:HGNC:17801]	56197893	56218096	-	9023	upstream
chr15	ALDBSSCT0000004611	ALDBSSCG0000002805	--	Annotated_lncRNA	134133581	134140304	-	ENSSSCT00000017645	ENSSSCG00000016204	IHH	indian hedgehog [Source:HGNC Symbol;Acc:HGNC:5956]	134122695	134129391	-	4189	upstream
chr15	ALDBSSCT0000004611	ALDBSSCG0000002805	--	Annotated_lncRNA	134133581	134140304	-	ENSSSCT00000017646	ENSSSCG00000016205	NHEJ1	non-homologous end joining factor 1 [Source:HGNC Symbol;Acc:HGNC:25737]	134145208	134232523	-	4903	downstream
chr1	ALDBSSCT0000000910	ALDBSSCG0000000556	--	Annotated_lncRNA	204871942	204878724	-	ENSSSCT00000005570	ENSSSCG00000005053	SOCS4	suppressor of cytokine signaling 4 [Source:HGNC Symbol;Acc:HGNC:19392]	204886220	204901845	+	7495	upstream
chr1	ALDBSSCT0000000916	ALDBSSCG0000000562	--	Annotated_lncRNA	208285764	208288239	-	ENSSSCT00000005589	ENSSSCG00000005072	PSMA3	proteasome subunit alpha 3 [Source:HGNC Symbol;Acc:HGNC:9532]	208247111	208275880	+	9883	downstream
chr1	ALDBSSCT0000000916	ALDBSSCG0000000562	--	Annotated_lncRNA	208285764	208288239	-	ENSSSCT00000005590	ENSSSCG00000005073	ARID4A	AT-rich interaction domain 4A [Source:HGNC Symbol;Acc:HGNC:9885]	208288849	208356182	+	609	upstream
chr7	ALDBSSCT0000010323	ALDBSSCG0000006277	--	Annotated_lncRNA	123878668	123880328	-	ENSSSCT00000002773	ENSSSCG00000002495	SYNE3	spectrin repeat containing nuclear envelope family member 3 [Source:HGNC Symbol;Acc:HGNC:19861]	123887451	123943922	-	7122	downstream
chr17	LNC_001046	XLOC_062481	--	Novel_lncRNA	12587929	12595613	+	ENSSSCT00000023914	ENSSSCG00000022297	--	--	12599377	12599643	+	3763	upstream
chr5	LNC_001590	XLOC_092792	--	Novel_lncRNA	79554104	79557218	-	ENSSSCT00000030858	ENSSSCG00000030685	ARID2	AT-rich interaction domain 2 [Source:HGNC Symbol;Acc:HGNC:18037]	79566481	79726285	+	9262	upstream
chr15	ALDBSSCT0000004167	ALDBSSCG0000002518	--	Annotated_lncRNA	37784173	37787981	+	ENSSSCT00000027260	ENSSSCG00000023155	--	--	37770243	37782103	+	2069	downstream
chr10	ALDBSSCT0000001406	ALDBSSCG0000000854	--	Annotated_lncRNA	13143378	13422720	-	ENSSSCT00000011850	ENSSSCG00000010832	HHIPL2	HHIP like 2 [Source:HGNC Symbol;Acc:HGNC:25842]	13425274	13444208	-	2553	downstream
chr10	ALDBSSCT0000001404	ALDBSSCG0000000854	--	Annotated_lncRNA	13117133	13422754	-	ENSSSCT00000011850	ENSSSCG00000010832	HHIPL2	HHIP like 2 [Source:HGNC Symbol;Acc:HGNC:25842]	13425274	13444208	-	2519	downstream
chr4	LNC_001427	XLOC_084239	--	Novel_lncRNA	121846131	121849701	+	ENSSSCT00000007497	ENSSSCG00000006845	PRPF38B	pre-mRNA processing factor 38B [Source:HGNC Symbol;Acc:HGNC:25512]	121836332	121846084	-	46	upstream
chr4	LNC_001426	XLOC_084131	--	Novel_lncRNA	117990705	117995461	+	ENSSSCT00000007426	ENSSSCG00000006780	WNT2B	Wnt family member 2B [Source:HGNC Symbol;Acc:HGNC:12781]	117972643	117990368	-	336	upstream
chr14	LNC_000829	XLOC_049123	--	Novel_lncRNA	121293043	121295681	+	ENSSSCT00000011547	ENSSSCG00000010555	--	--	121295736	121306475	+	54	upstream
chr4	LNC_001420	XLOC_083960	--	Novel_lncRNA	110280831	110283998	+	ENSSSCT00000007343	ENSSSCG00000006704	--	--	110281179	110293011	-	-2820	antisense
chr5	ALDBSSCT0000008530	ALDBSSCG0000005190	--	Annotated_lncRNA	23100501	23102266	-	ENSSSCT00000027288	ENSSSCG00000020725	--	--	22968087	23092644	+	7856	downstream
chr5	ALDBSSCT0000008530	ALDBSSCG0000005190	--	Annotated_lncRNA	23100501	23102266	-	ENSSSCT00000000403	ENSSSCG00000000377	--	--	23103687	23107038	-	1420	downstream
chr14	LNC_000820	XLOC_048352	--	Novel_lncRNA	81512303	81515152	+	ENSSSCT00000011261	ENSSSCG00000010289	MICU1	mitochondrial calcium uptake 1 [Source:HGNC Symbol;Acc:HGNC:1530]	81253334	81512159	-	143	upstream
chr14	LNC_000822	XLOC_048437	--	Novel_lncRNA	82497612	82518304	+	ENSSSCT00000011275	ENSSSCG00000010302	USP54	ubiquitin specific peptidase 54 [Source:HGNC Symbol;Acc:HGNC:23513]	82433503	82495889	-	1722	upstream
chr4	LNC_001428	XLOC_084239	--	Novel_lncRNA	121846157	121849701	+	ENSSSCT00000007497	ENSSSCG00000006845	PRPF38B	pre-mRNA processing factor 38B [Source:HGNC Symbol;Acc:HGNC:25512]	121836332	121846084	-	72	upstream
chr9	ALDBSSCT0000011237	ALDBSSCG0000006822	--	Annotated_lncRNA	70867594	70868740	+	ENSSSCT00000016643	ENSSSCG00000015274	ZBED6	zinc finger BED-type containing 6 [Source:HGNC Symbol;Acc:HGNC:33273]	70869462	70872407	+	721	upstream
chr9	ALDBSSCT0000011237	ALDBSSCG0000006822	--	Annotated_lncRNA	70867594	70868740	+	ENSSSCT00000027953	ENSSSCG00000028035	--	--	70877652	70903649	+	8911	upstream
chr9	ALDBSSCT0000011239	ALDBSSCG0000006824	--	Annotated_lncRNA	72046908	72055167	+	ENSSSCT00000016657	ENSSSCG00000015286	DSTYK	dual serine/threonine and tyrosine protein kinase [Source:HGNC Symbol;Acc:HGNC:29043]	72057962	72117189	-	2794	downstream
chr15	LNC_000958	XLOC_057125	--	Novel_lncRNA	52306695	52312628	-	ENSSSCT00000017185	ENSSSCG00000015783	CASP3	caspase 3 [Source:HGNC Symbol;Acc:HGNC:1504]	52291090	52300426	+	6268	downstream
chr1	ALDBSSCT0000000040	ALDBSSCG0000000024	--	Annotated_lncRNA	10542202	10549991	+	ENSSSCT00000032513	ENSSSCG00000021348	--	--	10552432	10554976	-	2440	downstream
chr15	LNC_000950	XLOC_056775	--	Novel_lncRNA	28756206	28766298	-	ENSSSCT00000030086	ENSSSCG00000030354	MAP3K2	mitogen-activated protein kinase kinase kinase 2 [Source:HGNC Symbol;Acc:HGNC:6854]	28766306	28858148	+	7	upstream
chr15	LNC_000953	XLOC_057015	--	Novel_lncRNA	45444196	45491689	-	ENSSSCT00000017172	ENSSSCG00000015771	NEIL3	nei like DNA glycosylase 3 [Source:HGNC Symbol;Acc:HGNC:24573]	45495291	45542560	+	3601	upstream
chr15	LNC_000954	XLOC_057015	--	Novel_lncRNA	45444196	45491689	-	ENSSSCT00000017172	ENSSSCG00000015771	NEIL3	nei like DNA glycosylase 3 [Source:HGNC Symbol;Acc:HGNC:24573]	45495291	45542560	+	3601	upstream
chr15	LNC_000956	XLOC_057015	--	Novel_lncRNA	45466703	45491690	-	ENSSSCT00000017172	ENSSSCG00000015771	NEIL3	nei like DNA glycosylase 3 [Source:HGNC Symbol;Acc:HGNC:24573]	45495291	45542560	+	3600	upstream
chr15	ALDBSSCT0000004578	ALDBSSCG0000002782	--	Annotated_lncRNA	116425426	116435610	-	ENSSSCT00000024437	ENSSSCG00000022805	--	--	116436598	116437899	+	987	upstream
chr15	ALDBSSCT0000004578	ALDBSSCG0000002782	--	Annotated_lncRNA	116425426	116435610	-	ENSSSCT00000017534	ENSSSCG00000016104	TRAK2	trafficking kinesin protein 2 [Source:HGNC Symbol;Acc:HGNC:13206]	116383931	116416265	-	9160	upstream
chr2	ALDBSSCT0000005881	ALDBSSCG0000003583	--	Annotated_lncRNA	48909275	48929108	+	ENSSSCT00000025883	ENSSSCG00000021170	FAR1	fatty acyl-CoA reductase 1 [Source:HGNC Symbol;Acc:HGNC:26222]	48831842	48904569	-	4705	upstream
chr2	ALDBSSCT0000005886	ALDBSSCG0000003588	--	Annotated_lncRNA	51984530	52003458	+	ENSSSCT00000014644	ENSSSCG00000013404	--	--	51975728	51976828	+	7701	downstream
chr2	ALDBSSCT0000005886	ALDBSSCG0000003588	--	Annotated_lncRNA	51984530	52003458	+	ENSSSCT00000014645	ENSSSCG00000013405	EIF4G2	eukaryotic translation initiation factor 4 gamma 2 [Source:HGNC Symbol;Acc:HGNC:3297]	52013091	52024509	+	9632	upstream
chr5	LNC_001513	XLOC_088855	--	Novel_lncRNA	45582691	45597856	+	ENSSSCT00000032100	ENSSSCG00000030616	KIAA1551	KIAA1551 [Source:HGNC Symbol;Acc:HGNC:25559]	45546617	45582548	-	142	upstream
chr5	LNC_001512	XLOC_088855	--	Novel_lncRNA	45582691	45597856	+	ENSSSCT00000032100	ENSSSCG00000030616	KIAA1551	KIAA1551 [Source:HGNC Symbol;Acc:HGNC:25559]	45546617	45582548	-	142	upstream
chr5	LNC_001511	XLOC_088855	--	Novel_lncRNA	45582656	45597856	+	ENSSSCT00000032100	ENSSSCG00000030616	KIAA1551	KIAA1551 [Source:HGNC Symbol;Acc:HGNC:25559]	45546617	45582548	-	107	upstream
chr5	LNC_001510	XLOC_088855	--	Novel_lncRNA	45582656	45597856	+	ENSSSCT00000032100	ENSSSCG00000030616	KIAA1551	KIAA1551 [Source:HGNC Symbol;Acc:HGNC:25559]	45546617	45582548	-	107	upstream
chr5	LNC_001516	XLOC_088855	--	Novel_lncRNA	45582718	45597856	+	ENSSSCT00000032100	ENSSSCG00000030616	KIAA1551	KIAA1551 [Source:HGNC Symbol;Acc:HGNC:25559]	45546617	45582548	-	169	upstream
chr5	LNC_001515	XLOC_088855	--	Novel_lncRNA	45582706	45597856	+	ENSSSCT00000032100	ENSSSCG00000030616	KIAA1551	KIAA1551 [Source:HGNC Symbol;Acc:HGNC:25559]	45546617	45582548	-	157	upstream
chr3	ALDBSSCT0000006728	ALDBSSCG0000004104	--	Annotated_lncRNA	56417412	56446272	+	ENSSSCT00000008953	ENSSSCG00000008175	CHST10	carbohydrate sulfotransferase 10 [Source:HGNC Symbol;Acc:HGNC:19650]	56449363	56485211	+	3090	upstream
chr9	ALDBSSCT0000011349	ALDBSSCG0000006894	--	Annotated_lncRNA	136225835	136229088	+	ENSSSCT00000016941	ENSSSCG00000015551	RGS8	regulator of G-protein signaling 8 [Source:HGNC Symbol;Acc:HGNC:16810]	136230946	136256626	+	1857	upstream
chr3	ENSSSCT00000034217	ENSSSCG00000008496	EIF2AK2	Annotated_lncRNA	109622369	109667785	+	ENSSSCT00000009299	ENSSSCG00000008497	GPATCH11	G-patch domain containing 11 [Source:HGNC Symbol;Acc:HGNC:26768]	109677473	109691729	-	9687	downstream
chr5	ALDBSSCT0000008407	ALDBSSCG0000005106	--	Annotated_lncRNA	86263829	86268052	+	ENSSSCT00000035178	ENSSSCG00000023972	DRAM1	DNA damage regulated autophagy modulator 1 [Source:HGNC Symbol;Acc:HGNC:25645]	86274166	86288364	-	6113	downstream
chr5	ALDBSSCT0000008407	ALDBSSCG0000005106	--	Annotated_lncRNA	86263829	86268052	+	ENSSSCT00000036399	ENSSSCG00000023972	DRAM1	DNA damage regulated autophagy modulator 1 [Source:HGNC Symbol;Acc:HGNC:25645]	86273946	86292147	-	5893	downstream
chr5	ALDBSSCT0000008407	ALDBSSCG0000005106	--	Annotated_lncRNA	86263829	86268052	+	ENSSSCT00000034650	ENSSSCG00000023972	DRAM1	DNA damage regulated autophagy modulator 1 [Source:HGNC Symbol;Acc:HGNC:25645]	86272194	86292147	-	4141	downstream
chr5	ALDBSSCT0000008407	ALDBSSCG0000005106	--	Annotated_lncRNA	86263829	86268052	+	ENSSSCT00000029052	ENSSSCG00000023972	DRAM1	DNA damage regulated autophagy modulator 1 [Source:HGNC Symbol;Acc:HGNC:25645]	86272186	86308016	-	4133	downstream
chr15	ALDBSSCT0000004374	ALDBSSCG0000002654	--	Annotated_lncRNA	155068866	155069748	+	ENSSSCT00000017834	ENSSSCG00000016379	HDLBP	high density lipoprotein binding protein [Source:HGNC Symbol;Acc:HGNC:4857]	155072239	155097235	-	2490	downstream
chr5	ALDBSSCT0000008403	ALDBSSCG0000005104	--	Annotated_lncRNA	86209540	86234219	+	ENSSSCT00000029179	ENSSSCG00000026250	--	--	86166626	86207763	+	1776	downstream
chr13	LNC_000770	XLOC_045676	--	Novel_lncRNA	143399969	143408369	-	ENSSSCT00000034535	ENSSSCG00000011848	TFRC	transferrin receptor [Source:HGNC Symbol;Acc:HGNC:11763]	143408460	143436489	+	90	upstream
chr13	LNC_000770	XLOC_045676	--	Novel_lncRNA	143399969	143408369	-	ENSSSCT00000034110	ENSSSCG00000011848	TFRC	transferrin receptor [Source:HGNC Symbol;Acc:HGNC:11763]	143412728	143417244	+	4358	upstream
chr13	LNC_000770	XLOC_045676	--	Novel_lncRNA	143399969	143408369	-	ENSSSCT00000012960	ENSSSCG00000011848	TFRC	transferrin receptor [Source:HGNC Symbol;Acc:HGNC:11763]	143409743	143437991	+	1373	upstream
chr13	LNC_000770	XLOC_045676	--	Novel_lncRNA	143399969	143408369	-	ENSSSCT00000033096	ENSSSCG00000011848	TFRC	transferrin receptor [Source:HGNC Symbol;Acc:HGNC:11763]	143409123	143416189	+	753	upstream
chr13	LNC_000771	XLOC_045676	--	Novel_lncRNA	143399969	143408376	-	ENSSSCT00000034535	ENSSSCG00000011848	TFRC	transferrin receptor [Source:HGNC Symbol;Acc:HGNC:11763]	143408460	143436489	+	83	upstream
chr13	LNC_000771	XLOC_045676	--	Novel_lncRNA	143399969	143408376	-	ENSSSCT00000034110	ENSSSCG00000011848	TFRC	transferrin receptor [Source:HGNC Symbol;Acc:HGNC:11763]	143412728	143417244	+	4351	upstream
chr13	LNC_000771	XLOC_045676	--	Novel_lncRNA	143399969	143408376	-	ENSSSCT00000012960	ENSSSCG00000011848	TFRC	transferrin receptor [Source:HGNC Symbol;Acc:HGNC:11763]	143409743	143437991	+	1366	upstream
chr13	LNC_000771	XLOC_045676	--	Novel_lncRNA	143399969	143408376	-	ENSSSCT00000033096	ENSSSCG00000011848	TFRC	transferrin receptor [Source:HGNC Symbol;Acc:HGNC:11763]	143409123	143416189	+	746	upstream
chr13	LNC_000772	XLOC_045978	--	Novel_lncRNA	156457218	156503327	-	ENSSSCT00000013047	ENSSSCG00000011923	NEPRO	nucleolus and neural progenitor protein [Source:HGNC Symbol;Acc:HGNC:24496]	156503350	156514581	+	22	upstream
chr6	LNC_001608	XLOC_093935	--	Novel_lncRNA	26121231	26129927	+	ENSSSCT00000003061	ENSSSCG00000002763	--	--	26106503	26116904	+	4326	downstream
chr6	LNC_001608	XLOC_093935	--	Novel_lncRNA	26121231	26129927	+	ENSSSCT00000003062	ENSSSCG00000002764	SMPD3	sphingomyelin phosphodiesterase 3 [Source:HGNC Symbol;Acc:HGNC:14240]	26120807	26204933	-	-8697	antisense
chr5	LNC_001601	XLOC_093223	--	Novel_lncRNA	105186691	105193893	-	ENSSSCT00000001028	ENSSSCG00000000940	--	--	105054245	105191159	+	-4469	antisense
chr5	LNC_001601	XLOC_093223	--	Novel_lncRNA	105186691	105193893	-	ENSSSCT00000001027	ENSSSCG00000000939	ACSS3	acyl-CoA synthetase short-chain family member 3 [Source:HGNC Symbol;Acc:HGNC:24723]	105196506	105368281	-	2612	downstream
chr2	LNC_001250	XLOC_074710	--	Novel_lncRNA	133243170	133255641	-	ENSSSCT00000015562	ENSSSCG00000014242	ZNF608	zinc finger protein 608 [Source:HGNC Symbol;Acc:HGNC:29238]	133256788	133396887	-	1146	downstream
chr4	ALDBSSCT0000008083	ALDBSSCG0000004905	--	Annotated_lncRNA	108784575	108785508	-	ENSSSCT00000007316	ENSSSCG00000006678	FCGR1A	-	108773581	108782557	+	2017	downstream
chr4	ALDBSSCT0000008083	ALDBSSCG0000004905	--	Annotated_lncRNA	108784575	108785508	-	ENSSSCT00000033004	ENSSSCG00000006678	FCGR1A	-	108773581	108782557	+	2017	downstream
chr4	ALDBSSCT0000008083	ALDBSSCG0000004905	--	Annotated_lncRNA	108784575	108785508	-	ENSSSCT00000036011	ENSSSCG00000006678	FCGR1A	-	108759133	108774836	+	9738	downstream
chr4	ALDBSSCT0000008083	ALDBSSCG0000004905	--	Annotated_lncRNA	108784575	108785508	-	ENSSSCT00000036053	ENSSSCG00000006678	FCGR1A	-	108759669	108782158	+	2416	downstream
chr4	ALDBSSCT0000008084	ALDBSSCG0000004906	--	Annotated_lncRNA	109365513	109366713	-	ENSSSCT00000007331	ENSSSCG00000006692	--	--	109372724	109405678	-	6010	downstream
chr4	ALDBSSCT0000008085	ALDBSSCG0000004907	--	Annotated_lncRNA	109825189	109830902	-	ENSSSCT00000007337	ENSSSCG00000006698	BCL9	B-cell CLL/lymphoma 9 [Source:HGNC Symbol;Acc:HGNC:1008]	109803776	109819766	-	5422	upstream
chr15	ALDBSSCT0000004289	ALDBSSCG0000002598	--	Annotated_lncRNA	117382781	117384523	+	ENSSSCT00000029321	ENSSSCG00000022225	NOP58	NOP58 ribonucleoprotein [Source:HGNC Symbol;Acc:HGNC:29926]	117351067	117375010	+	7770	downstream
chr4	ALDBSSCT0000008088	ALDBSSCG0000004909	--	Annotated_lncRNA	110270405	110272230	-	ENSSSCT00000007343	ENSSSCG00000006704	--	--	110281179	110293011	-	8948	downstream
chr2	LNC_001254	XLOC_074841	--	Novel_lncRNA	138981722	138990707	-	ENSSSCT00000015588	ENSSSCG00000014266	CDC42SE2	CDC42 small effector 2 [Source:HGNC Symbol;Acc:HGNC:18547]	138992124	138999352	+	1416	upstream
chr10	LNC_000484	XLOC_030527	--	Novel_lncRNA	55919716	55932607	-	ENSSSCT00000023555	ENSSSCG00000028135	--	--	55903795	55911223	+	8492	downstream
chr10	LNC_000485	XLOC_030527	--	Novel_lncRNA	55919716	55933074	-	ENSSSCT00000023555	ENSSSCG00000028135	--	--	55903795	55911223	+	8492	downstream
chr10	LNC_000483	XLOC_030395	--	Novel_lncRNA	47723358	47740711	-	ENSSSCT00000012072	ENSSSCG00000011030	--	--	47746354	47995946	-	5642	downstream
chr10	LNC_000480	XLOC_030392	--	Novel_lncRNA	47543373	47572298	-	ENSSSCT00000012070	ENSSSCG00000011028	EPC1	enhancer of polycomb homolog 1 [Source:HGNC Symbol;Acc:HGNC:19876]	47431313	47541566	-	1806	upstream
chr10	LNC_000481	XLOC_030392	--	Novel_lncRNA	47543373	47572298	-	ENSSSCT00000012070	ENSSSCG00000011028	EPC1	enhancer of polycomb homolog 1 [Source:HGNC Symbol;Acc:HGNC:19876]	47431313	47541566	-	1806	upstream
chr13	ALDBSSCT0000002623	ALDBSSCG0000001595	--	Annotated_lncRNA	36881156	36886431	+	ENSSSCT00000012501	ENSSSCG00000011421	MANF	mesencephalic astrocyte-derived neurotrophic factor [Source:HGNC Symbol;Acc:HGNC:15461]	36895068	36899306	-	8636	downstream
chr13	ALDBSSCT0000002623	ALDBSSCG0000001595	--	Annotated_lncRNA	36881156	36886431	+	ENSSSCT00000012500	ENSSSCG00000011420	RBM15B	RNA binding motif protein 15B [Source:HGNC Symbol;Acc:HGNC:24303]	36890397	36893078	-	3965	downstream
chr9	LNC_001905	XLOC_113616	--	Novel_lncRNA	51212523	51220523	+	ENSSSCT00000016465	ENSSSCG00000015099	--	--	51178780	51209999	-	2523	upstream
chrX	ENSSSCT00000035380	ENSSSCG00000031004	CH242-227G20.3	Annotated_lncRNA	22075081	22076913	+	ENSSSCT00000013325	ENSSSCG00000012181	PDK3	pyruvate dehydrogenase kinase 3 [Source:HGNC Symbol;Acc:HGNC:8811]	21997037	22067142	+	7938	downstream
chrX	ENSSSCT00000035380	ENSSSCG00000031004	CH242-227G20.3	Annotated_lncRNA	22075081	22076913	+	ENSSSCT00000035302	ENSSSCG00000012182	PCYT1B	phosphate cytidylyltransferase 1, choline, beta [Source:HGNC Symbol;Acc:HGNC:8755]	22086567	22221164	-	9653	downstream
chrX	ENSSSCT00000035380	ENSSSCG00000031004	CH242-227G20.3	Annotated_lncRNA	22075081	22076913	+	ENSSSCT00000033023	ENSSSCG00000012182	PCYT1B	phosphate cytidylyltransferase 1, choline, beta [Source:HGNC Symbol;Acc:HGNC:8755]	22084381	22126280	-	7467	downstream
chr15	ALDBSSCT0000004590	ALDBSSCG0000002792	--	Annotated_lncRNA	122882410	122883897	-	ENSSSCT00000026412	ENSSSCG00000023264	IDH1	isocitrate dehydrogenase (NADP(+)) 1, cytosolic [Source:HGNC Symbol;Acc:HGNC:5382]	122861672	122879852	-	2557	upstream
chr7	LNC_001770	XLOC_104779	--	Novel_lncRNA	63671111	63678459	-	ENSSSCT00000002136	ENSSSCG00000001907	--	--	63686694	63700113	-	8234	downstream
chr5	ALDBSSCT0000008663	ALDBSSCG0000005280	--	Annotated_lncRNA	93703142	93705880	-	ENSSSCT00000000994	ENSSSCG00000000910	SOCS2	suppressor of cytokine signaling 2 [Source:HGNC Symbol;Acc:HGNC:19382]	93712449	93717854	-	6568	downstream
chr2	LNC_001157	XLOC_069900	--	Novel_lncRNA	90992549	91001498	+	ENSSSCT00000029158	ENSSSCG00000014123	FAM151B	family with sequence similarity 151 member B [Source:HGNC Symbol;Acc:HGNC:33716]	90967313	90992174	+	374	downstream
chr2	LNC_001157	XLOC_069900	--	Novel_lncRNA	90992549	91001498	+	ENSSSCT00000015428	ENSSSCG00000014124	ANKRD34B	ankyrin repeat domain 34B [Source:HGNC Symbol;Acc:HGNC:33736]	91004486	91006027	-	2987	downstream
chr2	LNC_001157	XLOC_069900	--	Novel_lncRNA	90992549	91001498	+	ENSSSCT00000015427	ENSSSCG00000014123	FAM151B	family with sequence similarity 151 member B [Source:HGNC Symbol;Acc:HGNC:33716]	90967313	90990451	+	2097	downstream
chr7	LNC_001778	XLOC_105415	--	Novel_lncRNA	90615710	90628282	-	ENSSSCT00000026803	ENSSSCG00000022551	--	--	90637354	90675869	+	9071	upstream
chr6	ALDBSSCT0000008885	ALDBSSCG0000005431	--	Annotated_lncRNA	57187590	57192986	+	ENSSSCT00000004411	ENSSSCG00000003989	--	--	57195271	57211183	+	2284	upstream
chr6	ALDBSSCT0000008887	ALDBSSCG0000005432	--	Annotated_lncRNA	57219932	57255344	+	ENSSSCT00000004411	ENSSSCG00000003989	--	--	57195271	57211183	+	8748	downstream
chrX	ALDBSSCT0000011908	ALDBSSCG0000007243	--	Annotated_lncRNA	10912403	10921936	+	ENSSSCT00000035913	ENSSSCG00000012121	EGFL6	EGF like domain multiple 6 [Source:HGNC Symbol;Acc:HGNC:3235]	10924788	11237583	+	2851	upstream
chr15	LNC_000921	XLOC_054266	--	Novel_lncRNA	54795533	54804552	+	ENSSSCT00000026371	ENSSSCG00000022603	--	--	54814443	54822326	+	9890	upstream
chr3	ALDBSSCT0000007002	ALDBSSCG0000004255	--	Annotated_lncRNA	6629750	6639048	-	ENSSSCT00000008358	ENSSSCG00000007618	--	--	6577306	6623651	+	6098	downstream
chr3	ALDBSSCT0000007004	ALDBSSCG0000004257	--	Annotated_lncRNA	7833571	7836983	-	ENSSSCT00000008404	ENSSSCG00000007664	AGFG2	ArfGAP with FG repeats 2 [Source:HGNC Symbol;Acc:HGNC:5177]	7811252	7833017	+	553	downstream
chr3	ALDBSSCT0000007004	ALDBSSCG0000004257	--	Annotated_lncRNA	7833571	7836983	-	ENSSSCT00000008407	ENSSSCG00000007667	LRCH4	leucine rich repeats and calponin homology domain containing 4 [Source:HGNC Symbol;Acc:HGNC:6691]	7843516	7906079	-	6532	downstream
chr3	ALDBSSCT0000007004	ALDBSSCG0000004257	--	Annotated_lncRNA	7833571	7836983	-	ENSSSCT00000008405	ENSSSCG00000007665	--	--	7837929	7839602	+	945	upstream
chr12	ALDBSSCT0000002284	ALDBSSCG0000001378	--	Annotated_lncRNA	55458790	55465075	+	ENSSSCT00000019546	ENSSSCG00000017962	KDM6B	lysine demethylase 6B [Source:HGNC Symbol;Acc:HGNC:29012]	55465577	55474333	+	501	upstream
chr12	ALDBSSCT0000002284	ALDBSSCG0000001378	--	Annotated_lncRNA	55458790	55465075	+	ENSSSCT00000019547	ENSSSCG00000017963	--	--	55438911	55452302	+	6487	downstream
chr12	ALDBSSCT0000002285	ALDBSSCG0000001379	--	Annotated_lncRNA	56043891	56046091	+	ENSSSCT00000019571	ENSSSCG00000017985	RNF222	ring finger protein 222 [Source:HGNC Symbol;Acc:HGNC:34517]	56036550	56037200	-	6690	upstream
chr6	ALDBSSCT0000008860	ALDBSSCG0000005414	--	Annotated_lncRNA	51608949	51632330	+	ENSSSCT00000003585	ENSSSCG00000003226	CD33	-	51581787	51600200	+	8748	downstream
chr12	ALDBSSCT0000002539	ALDBSSCG0000001537	--	Annotated_lncRNA	62737412	62747740	-	ENSSSCT00000019641	ENSSSCG00000018046	SLC47A1	solute carrier family 47 member 1 [Source:HGNC Symbol;Acc:HGNC:25588]	62686585	62728885	+	8526	downstream
chr18	ALDBSSCT0000005662	ALDBSSCG0000003435	--	Annotated_lncRNA	20231663	20260530	-	ENSSSCT00000024955	ENSSSCG00000025967	SMKR1	small lysine rich protein 1 [Source:HGNC Symbol;Acc:HGNC:43561]	20261130	20270358	-	599	downstream
chr2	ALDBSSCT0000006280	ALDBSSCG0000003839	--	Annotated_lncRNA	50760130	50762330	-	ENSSSCT00000014641	ENSSSCG00000013401	DKK3	dickkopf WNT signaling pathway inhibitor 3 [Source:HGNC Symbol;Acc:HGNC:2893]	50699985	50758475	+	1654	downstream
chr2	ALDBSSCT0000006280	ALDBSSCG0000003839	--	Annotated_lncRNA	50760130	50762330	-	ENSSSCT00000014642	ENSSSCG00000013402	--	--	50763080	50825362	-	749	downstream
chr6	ALDBSSCT0000008868	ALDBSSCG0000005418	--	Annotated_lncRNA	51947964	51953151	+	ENSSSCT00000003604	ENSSSCG00000003244	--	--	51959390	51992422	-	6238	downstream
chr6	ALDBSSCT0000008869	ALDBSSCG0000005419	--	Annotated_lncRNA	52001497	52003237	+	ENSSSCT00000003604	ENSSSCG00000003244	--	--	51959390	51992422	-	9074	upstream
chr6	ALDBSSCT0000008869	ALDBSSCG0000005419	--	Annotated_lncRNA	52001497	52003237	+	ENSSSCT00000003603	ENSSSCG00000003243	--	--	52011706	52051380	+	8468	upstream
chr1	LNC_000392	XLOC_024810	--	Novel_lncRNA	165588949	165597096	-	ENSSSCT00000005375	ENSSSCG00000004869	CNDP1	carnosine dipeptidase 1 [Source:HGNC Symbol;Acc:HGNC:20675]	165565458	165588573	+	375	downstream
chr11	LNC_000555	XLOC_034106	--	Novel_lncRNA	53741898	53743953	-	ENSSSCT00000010383	ENSSSCG00000009470	--	--	53729558	53732930	-	8967	upstream
chr11	LNC_000555	XLOC_034106	--	Novel_lncRNA	53741898	53743953	-	ENSSSCT00000010384	ENSSSCG00000009471	--	--	53743973	53764847	+	19	upstream
chr11	LNC_000551	XLOC_033701	--	Novel_lncRNA	34987646	34989621	-	ENSSSCT00000010359	ENSSSCG00000009449	--	--	34989510	35171272	+	-112	antisense
chr2	ALDBSSCT0000006448	ALDBSSCG0000003935	--	Annotated_lncRNA	139000762	139021650	-	ENSSSCT00000015588	ENSSSCG00000014266	CDC42SE2	CDC42 small effector 2 [Source:HGNC Symbol;Acc:HGNC:18547]	138992124	138999352	+	1409	downstream
chr2	ALDBSSCT0000006448	ALDBSSCG0000003935	--	Annotated_lncRNA	139000762	139021650	-	ENSSSCT00000015589	ENSSSCG00000014267	--	--	139027023	139128129	-	5372	downstream
chr6	ALDBSSCT0000009044	ALDBSSCG0000005523	--	Annotated_lncRNA	110652467	110734909	+	ENSSSCT00000024859	ENSSSCG00000028047	--	--	110739417	110858569	-	4507	downstream
chr9	LNC_001911	XLOC_114299	--	Novel_lncRNA	83987431	83991315	+	ENSSSCT00000016710	ENSSSCG00000015337	--	--	83962673	83987408	-	22	upstream
chrY	LNC_002056	XLOC_123708	--	Novel_lncRNA	1191517	1199821	+	ENSSSCT00000031202	ENSSSCG00000025253	--	--	1045257	1191353	-	163	upstream
chr13	ALDBSSCT0000002757	ALDBSSCG0000001672	--	Annotated_lncRNA	107046764	107049932	+	ENSSSCT00000024213	ENSSSCG00000022054	--	--	107041446	107043539	-	3224	upstream
chr13	ALDBSSCT0000002757	ALDBSSCG0000001672	--	Annotated_lncRNA	107046764	107049932	+	ENSSSCT00000024239	ENSSSCG00000022054	--	--	107041040	107043539	-	3224	upstream
chr3	LNC_001361	XLOC_080667	--	Novel_lncRNA	92497901	92520054	-	ENSSSCT00000009214	ENSSSCG00000008414	ERLEC1	endoplasmic reticulum lectin 1 [Source:HGNC Symbol;Acc:HGNC:25222]	92521482	92549580	-	1427	downstream
chr3	LNC_001361	XLOC_080667	--	Novel_lncRNA	92497901	92520054	-	ENSSSCT00000009213	ENSSSCG00000008413	GPR75	G protein-coupled receptor 75 [Source:HGNC Symbol;Acc:HGNC:4526]	92492876	92499138	+	-1238	antisense
chr3	LNC_001361	XLOC_080667	--	Novel_lncRNA	92497901	92520054	-	ENSSSCT00000009212	ENSSSCG00000008412	PSME4	proteasome activator subunit 4 [Source:HGNC Symbol;Acc:HGNC:20635]	92361674	92489028	+	8872	downstream
chr17	ALDBSSCT0000005157	ALDBSSCG0000003111	--	Annotated_lncRNA	40668304	40670547	+	ENSSSCT00000007921	ENSSSCG00000007240	--	--	40656380	40667247	+	1056	downstream
chr3	LNC_001363	XLOC_080851	--	Novel_lncRNA	100425600	100427614	-	ENSSSCT00000009246	ENSSSCG00000008444	PRKCE	protein kinase C epsilon [Source:HGNC Symbol;Acc:HGNC:9401]	100427913	100615864	-	298	downstream
chr16	ALDBSSCT0000004978	ALDBSSCG0000003012	--	Annotated_lncRNA	53062375	53105485	-	ENSSSCT00000018487	ENSSSCG00000016977	--	--	53057620	53057988	+	4386	downstream
chr3	LNC_001365	XLOC_081036	--	Novel_lncRNA	103829853	103832763	-	ENSSSCT00000009266	ENSSSCG00000008464	--	--	103781462	103822042	+	7810	downstream
chr17	ALDBSSCT0000005153	ALDBSSCG0000003108	--	Annotated_lncRNA	36964088	36974780	+	ENSSSCT00000007837	ENSSSCG00000007164	OXT	Oxytocin-neurophysin 1 Oxytocin Neurophysin 1 [Source:UniProtKB/Swiss-Prot;Acc:P01177]	36975726	36976589	-	945	downstream
chr3	LNC_001368	XLOC_081446	--	Novel_lncRNA	121863833	121870001	-	ENSSSCT00000009396	ENSSSCG00000008586	TP53I3	tumor protein p53 inducible protein 3 [Source:HGNC Symbol;Acc:HGNC:19373]	121865412	121870296	+	-4590	antisense
chr3	LNC_001368	XLOC_081446	--	Novel_lncRNA	121863833	121870001	-	ENSSSCT00000009397	ENSSSCG00000008587	SF3B6	splicing factor 3b subunit 6 [Source:HGNC Symbol;Acc:HGNC:30096]	121870658	121883350	+	656	upstream
chr3	LNC_001369	XLOC_081522	--	Novel_lncRNA	125823363	125827021	-	ENSSSCT00000009411	ENSSSCG00000008600	PUM2	pumilio RNA binding family member 2 [Source:HGNC Symbol;Acc:HGNC:14958]	125827299	125934612	+	277	upstream
chr7	ENSSSCT00000035481	ENSSSCG00000030916	CH242-136A20.1	Annotated_lncRNA	106551501	106552738	-	ENSSSCT00000033132	ENSSSCG00000002396	GSTZ1	glutathione S-transferase zeta 1 [Source:HGNC Symbol;Acc:HGNC:4643]	106553043	106561411	-	304	downstream
chr7	ENSSSCT00000035481	ENSSSCG00000030916	CH242-136A20.1	Annotated_lncRNA	106551501	106552738	-	ENSSSCT00000002664	ENSSSCG00000002396	GSTZ1	glutathione S-transferase zeta 1 [Source:HGNC Symbol;Acc:HGNC:4643]	106553162	106564932	-	423	downstream
chr7	ENSSSCT00000035481	ENSSSCG00000030916	CH242-136A20.1	Annotated_lncRNA	106551501	106552738	-	ENSSSCT00000033055	ENSSSCG00000002396	GSTZ1	glutathione S-transferase zeta 1 [Source:HGNC Symbol;Acc:HGNC:4643]	106554247	106561133	-	1508	downstream
chr7	ENSSSCT00000035481	ENSSSCG00000030916	CH242-136A20.1	Annotated_lncRNA	106551501	106552738	-	ENSSSCT00000033148	ENSSSCG00000002396	GSTZ1	glutathione S-transferase zeta 1 [Source:HGNC Symbol;Acc:HGNC:4643]	106554247	106559336	-	1508	downstream
chr7	ENSSSCT00000035481	ENSSSCG00000030916	CH242-136A20.1	Annotated_lncRNA	106551501	106552738	-	ENSSSCT00000036355	ENSSSCG00000002396	GSTZ1	glutathione S-transferase zeta 1 [Source:HGNC Symbol;Acc:HGNC:4643]	106554247	106561133	-	1508	downstream
chr7	ENSSSCT00000035481	ENSSSCG00000030916	CH242-136A20.1	Annotated_lncRNA	106551501	106552738	-	ENSSSCT00000036020	ENSSSCG00000002396	GSTZ1	glutathione S-transferase zeta 1 [Source:HGNC Symbol;Acc:HGNC:4643]	106554530	106561133	-	1791	downstream
chr7	ENSSSCT00000035481	ENSSSCG00000030916	CH242-136A20.1	Annotated_lncRNA	106551501	106552738	-	ENSSSCT00000036281	ENSSSCG00000002396	GSTZ1	glutathione S-transferase zeta 1 [Source:HGNC Symbol;Acc:HGNC:4643]	106554049	106564927	-	1310	downstream
chr7	ENSSSCT00000035481	ENSSSCG00000030916	CH242-136A20.1	Annotated_lncRNA	106551501	106552738	-	ENSSSCT00000035937	ENSSSCG00000002396	GSTZ1	glutathione S-transferase zeta 1 [Source:HGNC Symbol;Acc:HGNC:4643]	106554762	106564932	-	2023	downstream
chr18	ALDBSSCT0000005753	ALDBSSCG0000003491	--	Annotated_lncRNA	55987408	55989754	-	ENSSSCT00000018237	ENSSSCG00000016755	POLM	DNA polymerase mu [Source:HGNC Symbol;Acc:HGNC:9185]	55973064	55984105	+	3302	downstream
chr16	ALDBSSCT0000004973	ALDBSSCG0000003010	--	Annotated_lncRNA	52627785	52635265	-	ENSSSCT00000018485	ENSSSCG00000016975	PTCD2	pentatricopeptide repeat domain 2 [Source:HGNC Symbol;Acc:HGNC:25734]	52593639	52620444	+	7340	downstream
chr13	ALDBSSCT0000003121	ALDBSSCG0000001873	--	Annotated_lncRNA	43546067	43546609	-	ENSSSCT00000012550	ENSSSCG00000011468	--	--	43455340	43545275	-	791	upstream
chr2	LNC_001166	XLOC_070183	--	Novel_lncRNA	107656450	107779132	+	ENSSSCT00000015487	ENSSSCG00000014175	RIOK2	RIO kinase 2 [Source:HGNC Symbol;Acc:HGNC:18999]	107632387	107655950	-	499	upstream
chr2	LNC_001164	XLOC_070182	--	Novel_lncRNA	107364877	107365871	+	ENSSSCT00000015485	ENSSSCG00000014173	LNPEP	leucyl-cystinyl aminopeptidase [Source:RefSeq peptide;Acc:NP_001098761]	107369918	107462862	+	4046	upstream
chr2	LNC_001164	XLOC_070182	--	Novel_lncRNA	107364877	107365871	+	ENSSSCT00000022458	ENSSSCG00000027860	--	--	107342452	107363745	+	1131	downstream
chr18	ALDBSSCT0000005714	ALDBSSCG0000003468	--	Annotated_lncRNA	43474678	43751946	-	ENSSSCT00000018146	ENSSSCG00000016667	--	--	43753100	43977664	-	1153	downstream
chr2	LNC_001169	XLOC_070319	--	Novel_lncRNA	112830180	113051087	+	ENSSSCT00000025743	ENSSSCG00000024089	C5orf30	chromosome 5 open reading frame 30 [Source:HGNC Symbol;Acc:HGNC:25052]	112821401	112822024	+	8155	downstream
chr6	ALDBSSCT0000009341	ALDBSSCG0000005697	--	Annotated_lncRNA	51995849	52001371	-	ENSSSCT00000003604	ENSSSCG00000003244	--	--	51959390	51992422	-	3426	upstream
chr2	ALDBSSCT0000006197	ALDBSSCG0000003790	--	Annotated_lncRNA	18918828	18921270	-	ENSSSCT00000014501	ENSSSCG00000013277	--	--	18926231	18929894	-	4960	downstream
chr2	ALDBSSCT0000006197	ALDBSSCG0000003790	--	Annotated_lncRNA	18918828	18921270	-	ENSSSCT00000030582	ENSSSCG00000013277	--	--	18927604	18941123	-	6333	downstream
chr2	ALDBSSCT0000006191	ALDBSSCG0000003785	--	Annotated_lncRNA	18181478	18195388	-	ENSSSCT00000014497	ENSSSCG00000013273	CHST1	carbohydrate sulfotransferase 1 [Source:HGNC Symbol;Acc:HGNC:1969]	18179200	18180435	-	1042	upstream
chr1	ALDBSSCT0000001091	ALDBSSCG0000000675	--	Annotated_lncRNA	313791077	313792321	-	ENSSSCT00000006417	ENSSSCG00000005838	TRAF2	TNF receptor associated factor 2 [Source:HGNC Symbol;Acc:HGNC:12032]	313771803	313782852	-	8224	upstream
chr8	ALDBSSCT0000010905	ALDBSSCG0000006607	--	Annotated_lncRNA	80966722	80981086	-	ENSSSCT00000009871	ENSSSCG00000009012	TMEM154	transmembrane protein 154 [Source:HGNC Symbol;Acc:HGNC:26489]	80945044	80965689	+	1032	downstream
chr11	ALDBSSCT0000001873	ALDBSSCG0000001134	--	Annotated_lncRNA	5163849	5173214	-	ENSSSCT00000010210	ENSSSCG00000009319	PAN3	PAN3 poly(A) specific ribonuclease subunit [Source:HGNC Symbol;Acc:HGNC:29991]	5173861	5301089	+	646	upstream
GL895469.1	LNC_000169	XLOC_010028	--	Novel_lncRNA	7829	13011	+	ENSSSCT00000031321	ENSSSCG00000023748	FAM96B	family with sequence similarity 96 member B [Source:HGNC Symbol;Acc:HGNC:24261]	5098	7914	-	-86	antisense
GL895469.1	LNC_000169	XLOC_010028	--	Novel_lncRNA	7829	13011	+	ENSSSCT00000029416	ENSSSCG00000023748	FAM96B	family with sequence similarity 96 member B [Source:HGNC Symbol;Acc:HGNC:24261]	5098	9898	-	-2070	antisense
chr11	ALDBSSCT0000001874	ALDBSSCG0000001134	--	Annotated_lncRNA	5168964	5173221	-	ENSSSCT00000010210	ENSSSCG00000009319	PAN3	PAN3 poly(A) specific ribonuclease subunit [Source:HGNC Symbol;Acc:HGNC:29991]	5173861	5301089	+	639	upstream
chr11	ALDBSSCT0000001875	ALDBSSCG0000001134	--	Annotated_lncRNA	5171422	5172818	-	ENSSSCT00000010210	ENSSSCG00000009319	PAN3	PAN3 poly(A) specific ribonuclease subunit [Source:HGNC Symbol;Acc:HGNC:29991]	5173861	5301089	+	1042	upstream
chr1	ALDBSSCT0000000706	ALDBSSCG0000000419	--	Annotated_lncRNA	40968874	40973251	-	ENSSSCT00000027938	ENSSSCG00000004222	NCOA7	nuclear receptor coactivator 7 [Source:HGNC Symbol;Acc:HGNC:21081]	40815279	40964113	-	4760	upstream
chr11	ALDBSSCT0000001879	ALDBSSCG0000001137	--	Annotated_lncRNA	5762208	5770778	-	ENSSSCT00000025196	ENSSSCG00000029470	--	--	5755487	5758255	-	3952	upstream
chr8	ALDBSSCT0000010639	ALDBSSCG0000006455	--	Annotated_lncRNA	130095423	130097114	+	ENSSSCT00000010053	ENSSSCG00000009180	-	RNA (guanine-9-)-methyltransferase domain-containing protein 2 [Source:RefSeq peptide;Acc:NP_001231075]	130101784	130133413	+	4669	upstream
chr8	ALDBSSCT0000010639	ALDBSSCG0000006455	--	Annotated_lncRNA	130095423	130097114	+	ENSSSCT00000010052	ENSSSCG00000009179	MTTP	-	130036414	130087547	-	7875	upstream
chrX	ALDBSSCT0000011956	ALDBSSCG0000007276	--	Annotated_lncRNA	98830979	98831537	+	ENSSSCT00000013710	ENSSSCG00000012541	--	--	98832416	98833552	+	878	upstream
chrX	ALDBSSCT0000011956	ALDBSSCG0000007276	--	Annotated_lncRNA	98830979	98831537	+	ENSSSCT00000013709	ENSSSCG00000012540	SLC25A53	solute carrier family 25 member 53 [Source:HGNC Symbol;Acc:HGNC:31894]	98822341	98823261	-	7717	upstream
chr6	ALDBSSCT0000009356	ALDBSSCG0000005709	--	Annotated_lncRNA	56637216	56644029	-	ENSSSCT00000003692	ENSSSCG00000003326	PEG3	paternally expressed 3 [Source:HGNC Symbol;Acc:HGNC:8826]	56621615	56629815	-	7400	upstream
chr2	ALDBSSCT0000006060	ALDBSSCG0000003711	--	Annotated_lncRNA	147186389	147192155	+	ENSSSCT00000015685	ENSSSCG00000014356	DNAJC18	DnaJ heat shock protein family (Hsp40) member C18 [Source:HGNC Symbol;Acc:HGNC:28429]	147196150	147212221	-	3994	downstream
chr2	ALDBSSCT0000006060	ALDBSSCG0000003711	--	Annotated_lncRNA	147186389	147192155	+	ENSSSCT00000032759	ENSSSCG00000014349	TMEM173	transmembrane protein 173 [Source:HGNC Symbol;Acc:HGNC:27962]	147171864	147176560	-	9828	upstream
chr2	ALDBSSCT0000006060	ALDBSSCG0000003711	--	Annotated_lncRNA	147186389	147192155	+	ENSSSCT00000033067	ENSSSCG00000014349	TMEM173	transmembrane protein 173 [Source:HGNC Symbol;Acc:HGNC:27962]	147175086	147176637	-	9751	upstream
chr2	ALDBSSCT0000006060	ALDBSSCG0000003711	--	Annotated_lncRNA	147186389	147192155	+	ENSSSCT00000035934	ENSSSCG00000014349	TMEM173	transmembrane protein 173 [Source:HGNC Symbol;Acc:HGNC:27962]	147169469	147176446	-	9942	upstream
chr2	ALDBSSCT0000006060	ALDBSSCG0000003711	--	Annotated_lncRNA	147186389	147192155	+	ENSSSCT00000033615	ENSSSCG00000014349	TMEM173	transmembrane protein 173 [Source:HGNC Symbol;Acc:HGNC:27962]	147175198	147177252	-	9136	upstream
chr2	ALDBSSCT0000006061	ALDBSSCG0000003711	--	Annotated_lncRNA	147189076	147192155	+	ENSSSCT00000015685	ENSSSCG00000014356	DNAJC18	DnaJ heat shock protein family (Hsp40) member C18 [Source:HGNC Symbol;Acc:HGNC:28429]	147196150	147212221	-	3994	downstream
chr2	ALDBSSCT0000006062	ALDBSSCG0000003712	--	Annotated_lncRNA	147213525	147225878	+	ENSSSCT00000015685	ENSSSCG00000014356	DNAJC18	DnaJ heat shock protein family (Hsp40) member C18 [Source:HGNC Symbol;Acc:HGNC:28429]	147196150	147212221	-	1303	upstream
chr2	ALDBSSCT0000006063	ALDBSSCG0000003712	--	Annotated_lncRNA	147213525	147228563	+	ENSSSCT00000015685	ENSSSCG00000014356	DNAJC18	DnaJ heat shock protein family (Hsp40) member C18 [Source:HGNC Symbol;Acc:HGNC:28429]	147196150	147212221	-	1303	upstream
chr16	ALDBSSCT0000005086	ALDBSSCG0000003065	--	Annotated_lncRNA	82411093	82413437	-	ENSSSCT00000029358	ENSSSCG00000025115	--	--	82398052	82401790	-	9302	upstream
chr5	ALDBSSCT0000008317	ALDBSSCG0000005048	--	Annotated_lncRNA	47703694	47704028	+	ENSSSCT00000000584	ENSSSCG00000000541	FAR2	fatty acyl-CoA reductase 2 [Source:HGNC Symbol;Acc:HGNC:25531]	47705577	47904532	-	1548	downstream
chr5	ALDBSSCT0000008317	ALDBSSCG0000005048	--	Annotated_lncRNA	47703694	47704028	+	ENSSSCT00000000578	ENSSSCG00000000536	ERGIC2	ERGIC and golgi 2 [Source:HGNC Symbol;Acc:HGNC:30208]	47652916	47702079	+	1614	downstream
chr9	LNC_001949	XLOC_116276	--	Novel_lncRNA	11643863	11647858	-	ENSSSCT00000016218	ENSSSCG00000014865	THAP12	THAP domain containing 12 [Source:HGNC Symbol;Acc:HGNC:9440]	11652415	11669844	-	4556	downstream
chr9	LNC_001944	XLOC_115861	--	Novel_lncRNA	583726	589920	-	ENSSSCT00000015922	ENSSSCG00000014572	ASCL3	achaete-scute family bHLH transcription factor 3 [Source:HGNC Symbol;Acc:HGNC:740]	587301	587840	+	-540	antisense
chr9	LNC_001944	XLOC_115861	--	Novel_lncRNA	583726	589920	-	ENSSSCT00000015921	ENSSSCG00000014577	TMEM9B	TMEM9 domain family member B [Source:HGNC Symbol;Acc:HGNC:1168]	566885	579604	+	4121	downstream
chr9	LNC_001944	XLOC_115861	--	Novel_lncRNA	583726	589920	-	ENSSSCT00000015927	ENSSSCG00000014577	TMEM9B	TMEM9 domain family member B [Source:HGNC Symbol;Acc:HGNC:1168]	567217	579604	+	4121	downstream
chr9	LNC_001944	XLOC_115861	--	Novel_lncRNA	583726	589920	-	ENSSSCT00000015924	ENSSSCG00000014574	AKIP1	A-kinase interacting protein 1 [Source:HGNC Symbol;Acc:HGNC:1170]	599874	606646	-	9953	downstream
chr9	LNC_001944	XLOC_115861	--	Novel_lncRNA	583726	589920	-	ENSSSCT00000028616	ENSSSCG00000014574	AKIP1	A-kinase interacting protein 1 [Source:HGNC Symbol;Acc:HGNC:1170]	599874	606646	-	9953	downstream
chr13	ALDBSSCT0000002836	ALDBSSCG0000001730	--	Annotated_lncRNA	150023878	150025327	+	ENSSSCT00000033659	ENSSSCG00000011899	CD80	CD80 molecule [Source:HGNC Symbol;Acc:HGNC:1700]	150034412	150044259	-	9084	downstream
chr13	ALDBSSCT0000002836	ALDBSSCG0000001730	--	Annotated_lncRNA	150023878	150025327	+	ENSSSCT00000013021	ENSSSCG00000011899	CD80	CD80 molecule [Source:HGNC Symbol;Acc:HGNC:1700]	150034412	150044259	-	9084	downstream
chr13	ALDBSSCT0000002835	ALDBSSCG0000001729	--	Annotated_lncRNA	147427560	147428834	+	ENSSSCT00000012987	ENSSSCG00000011873	HSPBAP1	HSPB1 associated protein 1 [Source:HGNC Symbol;Acc:HGNC:16389]	147363862	147426629	+	930	downstream
chr13	ALDBSSCT0000002835	ALDBSSCG0000001729	--	Annotated_lncRNA	147427560	147428834	+	ENSSSCT00000012988	ENSSSCG00000011874	PARP14	poly(ADP-ribose) polymerase family member 14 [Source:HGNC Symbol;Acc:HGNC:29232]	147430046	147483562	-	1211	downstream
chr10	ALDBSSCT0000001279	ALDBSSCG0000000777	--	Annotated_lncRNA	55911774	55915474	+	ENSSSCT00000023555	ENSSSCG00000028135	--	--	55903795	55911223	+	550	downstream
chr9	LNC_001942	XLOC_115857	--	Novel_lncRNA	231248	239726	-	ENSSSCT00000015929	ENSSSCG00000014579	--	--	240073	266213	+	346	upstream
chr13	ALDBSSCT0000002830	ALDBSSCG0000001724	--	Annotated_lncRNA	143232213	143236928	+	ENSSSCT00000012957	ENSSSCG00000011845	PCYT1A	phosphate cytidylyltransferase 1, choline, alpha [Source:HGNC Symbol;Acc:HGNC:8754]	143238518	143288872	+	1589	upstream
chr4	ALDBSSCT0000007957	ALDBSSCG0000004823	--	Annotated_lncRNA	55302085	55304394	-	ENSSSCT00000006730	ENSSSCG00000006137	WWP1	WW domain containing E3 ubiquitin protein ligase 1 [Source:HGNC Symbol;Acc:HGNC:17004]	55305131	55403541	-	736	downstream
chr4	ALDBSSCT0000007957	ALDBSSCG0000004823	--	Annotated_lncRNA	55302085	55304394	-	ENSSSCT00000006729	ENSSSCG00000006136	RMDN1	regulator of microtubule dynamics 1 [Source:HGNC Symbol;Acc:HGNC:24285]	55260809	55298662	+	3422	downstream
chr1	ALDBSSCT0000000679	ALDBSSCG0000000409	--	Annotated_lncRNA	31515310	31522414	-	ENSSSCT00000004602	ENSSSCG00000004163	BCLAF1	BCL2 associated transcription factor 1 [Source:HGNC Symbol;Acc:HGNC:16863]	31490843	31513300	-	2009	upstream
GL892477.1	LNC_000011	XLOC_000725	--	Novel_lncRNA	95198	98661	+	ENSSSCT00000026634	ENSSSCG00000021513	--	--	81700	85418	-	9779	upstream
GL892477.1	LNC_000011	XLOC_000725	--	Novel_lncRNA	95198	98661	+	ENSSSCT00000012144	ENSSSCG00000011097	--	--	78415	88255	+	6942	downstream
GL892477.1	LNC_000013	XLOC_000725	--	Novel_lncRNA	95230	98661	+	ENSSSCT00000026634	ENSSSCG00000021513	--	--	81700	85418	-	9811	upstream
GL892477.1	LNC_000013	XLOC_000725	--	Novel_lncRNA	95230	98661	+	ENSSSCT00000012144	ENSSSCG00000011097	--	--	78415	88255	+	6974	downstream
GL892477.1	LNC_000012	XLOC_000725	--	Novel_lncRNA	95200	113529	+	ENSSSCT00000026634	ENSSSCG00000021513	--	--	81700	85418	-	9781	upstream
GL892477.1	LNC_000012	XLOC_000725	--	Novel_lncRNA	95200	113529	+	ENSSSCT00000012144	ENSSSCG00000011097	--	--	78415	88255	+	6944	downstream
GL892477.1	LNC_000015	XLOC_000725	--	Novel_lncRNA	95261	98661	+	ENSSSCT00000026634	ENSSSCG00000021513	--	--	81700	85418	-	9842	upstream
GL892477.1	LNC_000015	XLOC_000725	--	Novel_lncRNA	95261	98661	+	ENSSSCT00000012144	ENSSSCG00000011097	--	--	78415	88255	+	7005	downstream
GL892477.1	LNC_000014	XLOC_000725	--	Novel_lncRNA	95240	113529	+	ENSSSCT00000026634	ENSSSCG00000021513	--	--	81700	85418	-	9821	upstream
GL892477.1	LNC_000014	XLOC_000725	--	Novel_lncRNA	95240	113529	+	ENSSSCT00000012144	ENSSSCG00000011097	--	--	78415	88255	+	6984	downstream
GL892541.1	LNC_000019	XLOC_000884	--	Novel_lncRNA	1926	11429	+	ENSSSCT00000009900	ENSSSCG00000009040	SMAD1	SMAD family member 1 [Source:HGNC Symbol;Acc:HGNC:6767]	11931	31371	-	501	downstream
GL892541.1	LNC_000018	XLOC_000884	--	Novel_lncRNA	1926	11429	+	ENSSSCT00000009900	ENSSSCG00000009040	SMAD1	SMAD family member 1 [Source:HGNC Symbol;Acc:HGNC:6767]	11931	31371	-	501	downstream
chr4	LNC_001389	XLOC_082232	--	Novel_lncRNA	17213394	17230955	+	ENSSSCT00000027275	ENSSSCG00000021004	DERL1	derlin 1 [Source:HGNC Symbol;Acc:HGNC:28454]	17236603	17252337	-	5647	downstream
chr3	LNC_001381	XLOC_081737	--	Novel_lncRNA	142375511	142383276	-	ENSSSCT00000009474	ENSSSCG00000008659	ACP1	acid phosphatase 1, soluble [Source:HGNC Symbol;Acc:HGNC:122]	142383410	142396888	+	133	upstream
chr4	LNC_001386	XLOC_082140	--	Novel_lncRNA	10796276	10800623	+	ENSSSCT00000006542	ENSSSCG00000005959	FAM49B	family with sequence similarity 49 member B [Source:HGNC Symbol;Acc:HGNC:25216]	10801066	10859545	+	442	upstream
chr5	ALDBSSCT0000008507	ALDBSSCG0000005173	--	Annotated_lncRNA	11962122	11963744	-	ENSSSCT00000000163	ENSSSCG00000000155	TIMP3	TIMP metallopeptidase inhibitor 3 [Source:HGNC Symbol;Acc:HGNC:11822]	11965791	11975326	-	2046	downstream
chr1	ALDBSSCT0000000900	ALDBSSCG0000000546	--	Annotated_lncRNA	187481152	187482550	-	ENSSSCT00000023869	ENSSSCG00000021112	--	--	187485435	187623277	-	2884	downstream
chr1	ALDBSSCT0000000905	ALDBSSCG0000000551	--	Annotated_lncRNA	200075380	200091036	-	ENSSSCT00000005528	ENSSSCG00000005012	ARF6	ADP ribosylation factor 6 [Source:HGNC Symbol;Acc:HGNC:659]	200074039	200074566	-	813	upstream
chr8	ALDBSSCT0000010620	ALDBSSCG0000006443	--	Annotated_lncRNA	121627294	121635959	+	ENSSSCT00000010013	ENSSSCG00000009144	ETNPPL	ethanolamine-phosphate phospho-lyase [Source:HGNC Symbol;Acc:HGNC:14404]	121603073	121621976	+	5317	downstream
chr8	ALDBSSCT0000010620	ALDBSSCG0000006443	--	Annotated_lncRNA	121627294	121635959	+	ENSSSCT00000010012	ENSSSCG00000009144	ETNPPL	ethanolamine-phosphate phospho-lyase [Source:HGNC Symbol;Acc:HGNC:14404]	121603073	121621976	+	5317	downstream
chr7	ALDBSSCT0000010107	ALDBSSCG0000006156	--	Annotated_lncRNA	29699362	29747333	-	ENSSSCT00000034660	ENSSSCG00000001476	HSD17B8	hydroxysteroid 17-beta dehydrogenase 8 [Source:HGNC Symbol;Acc:HGNC:3554]	29753837	29756015	-	6503	downstream
chr7	ALDBSSCT0000010107	ALDBSSCG0000006156	--	Annotated_lncRNA	29699362	29747333	-	ENSSSCT00000001648	ENSSSCG00000001477	RING1	ring finger protein 1 [Source:HGNC Symbol;Acc:HGNC:10018]	29748103	29752115	-	769	downstream
chr7	ALDBSSCT0000010107	ALDBSSCG0000006156	--	Annotated_lncRNA	29699362	29747333	-	ENSSSCT00000001647	ENSSSCG00000001476	HSD17B8	hydroxysteroid 17-beta dehydrogenase 8 [Source:HGNC Symbol;Acc:HGNC:3554]	29753837	29756015	-	6503	downstream
chr7	ALDBSSCT0000010107	ALDBSSCG0000006156	--	Annotated_lncRNA	29699362	29747333	-	ENSSSCT00000036497	ENSSSCG00000030920	SLC39A7	-	29756786	29760193	-	9452	downstream
chr7	ALDBSSCT0000010107	ALDBSSCG0000006156	--	Annotated_lncRNA	29699362	29747333	-	ENSSSCT00000033565	ENSSSCG00000001476	HSD17B8	hydroxysteroid 17-beta dehydrogenase 8 [Source:HGNC Symbol;Acc:HGNC:3554]	29753837	29756003	-	6503	downstream
chr7	ALDBSSCT0000010107	ALDBSSCG0000006156	--	Annotated_lncRNA	29699362	29747333	-	ENSSSCT00000001644	ENSSSCG00000001475	LOC100155600	-	29756225	29760618	-	8891	downstream
chr7	ALDBSSCT0000010107	ALDBSSCG0000006156	--	Annotated_lncRNA	29699362	29747333	-	ENSSSCT00000036035	ENSSSCG00000030920	SLC39A7	-	29756786	29760193	-	9452	downstream
chr7	ALDBSSCT0000010107	ALDBSSCG0000006156	--	Annotated_lncRNA	29699362	29747333	-	ENSSSCT00000034292	ENSSSCG00000001476	HSD17B8	hydroxysteroid 17-beta dehydrogenase 8 [Source:HGNC Symbol;Acc:HGNC:3554]	29753837	29756015	-	6503	downstream
chr10	ALDBSSCT0000001476	ALDBSSCG0000000892	--	Annotated_lncRNA	30841605	30845210	-	ENSSSCT00000029331	ENSSSCG00000027312	PTCH1	patched 1 [Source:HGNC Symbol;Acc:HGNC:9585]	30847386	30915236	+	2175	upstream
chr10	ALDBSSCT0000001477	ALDBSSCG0000000893	--	Annotated_lncRNA	31318612	31322714	-	ENSSSCT00000024425	ENSSSCG00000023464	--	--	31309424	31316163	+	2448	downstream
chr10	ALDBSSCT0000001475	ALDBSSCG0000000892	--	Annotated_lncRNA	30841605	30844841	-	ENSSSCT00000029331	ENSSSCG00000027312	PTCH1	patched 1 [Source:HGNC Symbol;Acc:HGNC:9585]	30847386	30915236	+	2544	upstream
chr14	LNC_000837	XLOC_049655	--	Novel_lncRNA	146932383	146939216	+	ENSSSCT00000011758	ENSSSCG00000010746	ADAM12	ADAM metallopeptidase domain 12 [Source:HGNC Symbol;Acc:HGNC:190]	146937523	147045431	-	-1694	antisense
chr14	LNC_000837	XLOC_049655	--	Novel_lncRNA	146932383	146939216	+	ENSSSCT00000024476	ENSSSCG00000010745	FANK1	fibronectin type III and ankyrin repeat domains 1 [Source:HGNC Symbol;Acc:HGNC:23527]	146898152	146928694	+	3688	downstream
chr14	LNC_000837	XLOC_049655	--	Novel_lncRNA	146932383	146939216	+	ENSSSCT00000011757	ENSSSCG00000010745	FANK1	fibronectin type III and ankyrin repeat domains 1 [Source:HGNC Symbol;Acc:HGNC:23527]	146827125	146928694	+	3688	downstream
chr14	LNC_000835	XLOC_049436	--	Novel_lncRNA	135641961	135643246	+	ENSSSCT00000011647	ENSSSCG00000010648	CCDC186	coiled-coil domain containing 186 [Source:HGNC Symbol;Acc:HGNC:24349]	135593211	135641867	-	93	upstream
chr1	ALDBSSCT0000000291	ALDBSSCG0000000166	--	Annotated_lncRNA	140666265	140667876	+	ENSSSCT00000005152	ENSSSCG00000004666	--	--	140670863	140706384	+	2986	upstream
chr1	ALDBSSCT0000000290	ALDBSSCG0000000166	--	Annotated_lncRNA	140665823	140667876	+	ENSSSCT00000005152	ENSSSCG00000004666	--	--	140670863	140706384	+	2986	upstream
chr1	ALDBSSCT0000000293	ALDBSSCG0000000168	--	Annotated_lncRNA	142577396	142578248	+	ENSSSCT00000005185	ENSSSCG00000004695	WDR76	WD repeat domain 76 [Source:HGNC Symbol;Acc:HGNC:25773]	142483492	142568978	-	8417	upstream
chr1	ALDBSSCT0000000293	ALDBSSCG0000000168	--	Annotated_lncRNA	142577396	142578248	+	ENSSSCT00000005187	ENSSSCG00000004697	HYPK	huntingtin interacting protein K [Source:HGNC Symbol;Acc:HGNC:18418]	142587865	142589341	-	9616	downstream
chr1	ALDBSSCT0000000293	ALDBSSCG0000000168	--	Annotated_lncRNA	142577396	142578248	+	ENSSSCT00000029233	ENSSSCG00000025604	--	--	142576041	142576181	+	1214	downstream
chr14	LNC_000838	XLOC_049712	--	Novel_lncRNA	152204898	152206803	+	ENSSSCT00000030128	ENSSSCG00000024388	BNIP3	BCL2 interacting protein 3 [Source:HGNC Symbol;Acc:HGNC:1084]	152194734	152204810	-	87	upstream
chr1	ALDBSSCT0000000295	ALDBSSCG0000000169	--	Annotated_lncRNA	142835400	142837817	+	ENSSSCT00000005197	ENSSSCG00000004706	--	--	142814194	142825616	+	9783	downstream
chr1	ALDBSSCT0000000294	ALDBSSCG0000000169	--	Annotated_lncRNA	142834679	142837817	+	ENSSSCT00000005197	ENSSSCG00000004706	--	--	142814194	142825616	+	9062	downstream
chr14	ENSSSCT00000021277	ENSSSCG00000019682	7SK	Annotated_lncRNA	115787973	115788244	-	ENSSSCT00000011474	ENSSSCG00000010486	HELLS	helicase, lymphoid-specific [Source:HGNC Symbol;Acc:HGNC:4861]	115768792	115812890	-	-272	sense_overlapping
chr9	ALDBSSCT0000011118	ALDBSSCG0000006750	--	Annotated_lncRNA	30728057	30732233	+	ENSSSCT00000016321	ENSSSCG00000014960	AMOTL1	angiomotin like 1 [Source:HGNC Symbol;Acc:HGNC:17811]	30651655	30726848	+	1208	downstream
chr9	ALDBSSCT0000011110	ALDBSSCG0000006744	--	Annotated_lncRNA	24125745	24169526	+	ENSSSCT00000016280	ENSSSCG00000014924	CTSC	cathepsin C [Source:HGNC Symbol;Acc:HGNC:2528]	24081771	24116601	-	9143	upstream
chr3	ALDBSSCT0000006848	ALDBSSCG0000004174	--	Annotated_lncRNA	119039976	119041479	+	ENSSSCT00000009361	ENSSSCG00000008556	KHK	ketohexokinase [Source:HGNC Symbol;Acc:HGNC:6315]	119019722	119030158	-	9817	upstream
chr3	ALDBSSCT0000006848	ALDBSSCG0000004174	--	Annotated_lncRNA	119039976	119041479	+	ENSSSCT00000009363	ENSSSCG00000008558	AGBL5	ATP/GTP binding protein like 5 [Source:HGNC Symbol;Acc:HGNC:26147]	119046248	119064498	-	4768	downstream
chr3	ALDBSSCT0000006848	ALDBSSCG0000004174	--	Annotated_lncRNA	119039976	119041479	+	ENSSSCT00000023134	ENSSSCG00000008558	AGBL5	ATP/GTP binding protein like 5 [Source:HGNC Symbol;Acc:HGNC:26147]	119045334	119064498	-	3854	downstream
chr3	ALDBSSCT0000006848	ALDBSSCG0000004174	--	Annotated_lncRNA	119039976	119041479	+	ENSSSCT00000009362	ENSSSCG00000008557	EMILIN1	elastin microfibril interfacer 1 [Source:HGNC Symbol;Acc:HGNC:19880]	119030264	119038488	-	1487	upstream
chr3	ALDBSSCT0000006848	ALDBSSCG0000004174	--	Annotated_lncRNA	119039976	119041479	+	ENSSSCT00000028246	ENSSSCG00000008556	KHK	ketohexokinase [Source:HGNC Symbol;Acc:HGNC:6315]	119019722	119030158	-	9817	upstream
chr9	ALDBSSCT0000011201	ALDBSSCG0000006801	--	Annotated_lncRNA	59043535	59050625	+	ENSSSCT00000028018	ENSSSCG00000022413	TIRAP	TIR domain containing adaptor protein [Source:HGNC Symbol;Acc:HGNC:17192]	59051622	59056203	+	996	upstream
chr9	ALDBSSCT0000011201	ALDBSSCG0000006801	--	Annotated_lncRNA	59043535	59050625	+	ENSSSCT00000023210	ENSSSCG00000030017	FOXRED1	FAD dependent oxidoreductase domain containing 1 [Source:HGNC Symbol;Acc:HGNC:26927]	59028736	59036373	+	7161	downstream
chr9	ALDBSSCT0000011207	ALDBSSCG0000006805	--	Annotated_lncRNA	61707516	61709121	+	ENSSSCT00000016603	ENSSSCG00000015237	--	--	61716477	61811066	+	7355	upstream
chr10	ALDBSSCT0000001507	ALDBSSCG0000000914	--	Annotated_lncRNA	44108210	44113541	-	ENSSSCT00000012055	ENSSSCG00000011013	WAC	WW domain containing adaptor with coiled-coil [Source:HGNC Symbol;Acc:HGNC:17327]	44120645	44210868	+	7103	upstream
chr10	ALDBSSCT0000001507	ALDBSSCG0000000914	--	Annotated_lncRNA	44108210	44113541	-	ENSSSCT00000024775	ENSSSCG00000011013	WAC	WW domain containing adaptor with coiled-coil [Source:HGNC Symbol;Acc:HGNC:17327]	44120645	44210868	+	7103	upstream
chr14	ALDBSSCT0000004024	ALDBSSCG0000002425	--	Annotated_lncRNA	110488911	110494551	-	ENSSSCT00000011443	ENSSSCG00000010457	KIF20B	kinesin family member 20B [Source:HGNC Symbol;Acc:HGNC:7212]	110499118	110581337	+	4566	upstream
chr1	ALDBSSCT0000000055	ALDBSSCG0000000035	--	Annotated_lncRNA	18470168	18473816	+	ENSSSCT00000004538	ENSSSCG00000004103	PCMT1	protein-L-isoaspartate(D-aspartate) O-methyltransferase [Source:RefSeq peptide;Acc:NP_001182709]	18440912	18462186	+	7981	downstream
chr1	ALDBSSCT0000000055	ALDBSSCG0000000035	--	Annotated_lncRNA	18470168	18473816	+	ENSSSCT00000004536	ENSSSCG00000004101	LRP11	LDL receptor related protein 11 [Source:HGNC Symbol;Acc:HGNC:16936]	18476457	18536993	-	2640	downstream
chr5	LNC_001568	XLOC_091597	--	Novel_lncRNA	22374229	22396489	-	ENSSSCT00000026624	ENSSSCG00000024909	--	--	22384545	22385483	+	-939	antisense
chr5	LNC_001569	XLOC_091597	--	Novel_lncRNA	22374229	22397741	-	ENSSSCT00000026624	ENSSSCG00000024909	--	--	22384545	22385483	+	-939	antisense
chr5	LNC_001567	XLOC_091477	--	Novel_lncRNA	21700412	21701038	-	ENSSSCT00000000344	ENSSSCG00000000323	OR6C76	olfactory receptor family 6 subfamily C member 76 [Source:HGNC Symbol;Acc:HGNC:31305]	21692500	21693441	+	6970	downstream
chr5	LNC_001564	XLOC_091332	--	Novel_lncRNA	17766740	17770669	-	ENSSSCT00000000245	ENSSSCG00000000228	SCN8A	sodium voltage-gated channel alpha subunit 8 [Source:HGNC Symbol;Acc:HGNC:10596]	17559778	17766806	+	-67	antisense
chr5	LNC_001562	XLOC_091332	--	Novel_lncRNA	17766456	17770669	-	ENSSSCT00000000245	ENSSSCG00000000228	SCN8A	sodium voltage-gated channel alpha subunit 8 [Source:HGNC Symbol;Acc:HGNC:10596]	17559778	17766806	+	-351	antisense
chr5	LNC_001563	XLOC_091332	--	Novel_lncRNA	17766740	17770669	-	ENSSSCT00000000245	ENSSSCG00000000228	SCN8A	sodium voltage-gated channel alpha subunit 8 [Source:HGNC Symbol;Acc:HGNC:10596]	17559778	17766806	+	-67	antisense
chr5	LNC_001560	XLOC_091332	--	Novel_lncRNA	17766456	17769938	-	ENSSSCT00000000245	ENSSSCG00000000228	SCN8A	sodium voltage-gated channel alpha subunit 8 [Source:HGNC Symbol;Acc:HGNC:10596]	17559778	17766806	+	-351	antisense
chr5	LNC_001561	XLOC_091332	--	Novel_lncRNA	17766456	17770669	-	ENSSSCT00000000245	ENSSSCG00000000228	SCN8A	sodium voltage-gated channel alpha subunit 8 [Source:HGNC Symbol;Acc:HGNC:10596]	17559778	17766806	+	-351	antisense
chr14	ALDBSSCT0000004075	ALDBSSCG0000002465	--	Annotated_lncRNA	145078716	145089537	-	ENSSSCT00000024468	ENSSSCG00000029482	CHST15	carbohydrate sulfotransferase 15 [Source:HGNC Symbol;Acc:HGNC:18137]	145096700	145179039	-	7162	downstream
chr2	ALDBSSCT0000006258	ALDBSSCG0000003824	--	Annotated_lncRNA	43616548	43618046	-	ENSSSCT00000014592	ENSSSCG00000013361	--	--	43606171	43614256	+	2291	downstream
chr2	ALDBSSCT0000006258	ALDBSSCG0000003824	--	Annotated_lncRNA	43616548	43618046	-	ENSSSCT00000014593	ENSSSCG00000013362	UEVLD	UEV and lactate/malate dehyrogenase domains [Source:HGNC Symbol;Acc:HGNC:30866]	43627375	43798211	+	9328	upstream
chrX	ALDBSSCT0000011950	ALDBSSCG0000007272	--	Annotated_lncRNA	86697706	86698443	+	ENSSSCT00000028335	ENSSSCG00000027552	--	--	86412496	86693109	+	4596	downstream
chr6	ALDBSSCT0000009432	ALDBSSCG0000005754	--	Annotated_lncRNA	78193363	78195251	-	ENSSSCT00000029793	ENSSSCG00000003577	WASF2	WAS protein family, member 2 [Source:RefSeq peptide;Acc:NP_001245373]	78196658	78289075	-	1406	downstream
chr6	ALDBSSCT0000009432	ALDBSSCG0000005754	--	Annotated_lncRNA	78193363	78195251	-	ENSSSCT00000003970	ENSSSCG00000003576	GPR3	G protein-coupled receptor 3 [Source:HGNC Symbol;Acc:HGNC:4484]	78181307	78184402	+	8960	downstream
chr6	ALDBSSCT0000009432	ALDBSSCG0000005754	--	Annotated_lncRNA	78193363	78195251	-	ENSSSCT00000003971	ENSSSCG00000003577	WASF2	WAS protein family, member 2 [Source:RefSeq peptide;Acc:NP_001245373]	78196522	78289075	-	1270	downstream
chr7	ALDBSSCT0000009923	ALDBSSCG0000006042	--	Annotated_lncRNA	114362057	114364091	+	ENSSSCT00000002687	ENSSSCG00000002418	FLRT2	fibronectin leucine rich transmembrane protein 2 [Source:HGNC Symbol;Acc:HGNC:3761]	114357205	114359187	+	2869	downstream
chr3	ALDBSSCT0000006997	ALDBSSCG0000004251	--	Annotated_lncRNA	4727106	4728670	-	ENSSSCT00000008324	ENSSSCG00000007585	ACTB	actin beta [Source:HGNC Symbol;Acc:HGNC:132]	4729276	4732654	-	605	downstream
chr3	ALDBSSCT0000006997	ALDBSSCG0000004251	--	Annotated_lncRNA	4727106	4728670	-	ENSSSCT00000026431	ENSSSCG00000027807	--	--	4712389	4722083	-	5022	upstream
chr15	ALDBSSCT0000004367	ALDBSSCG0000002648	--	Annotated_lncRNA	152402601	152403285	+	ENSSSCT00000017795	ENSSSCG00000016340	ASB1	ankyrin repeat and SOCS box containing 1 [Source:HGNC Symbol;Acc:HGNC:16011]	152382675	152398097	+	4503	downstream
chr4	ALDBSSCT0000007728	ALDBSSCG0000004693	--	Annotated_lncRNA	135322155	135322614	+	ENSSSCT00000007549	ENSSSCG00000006894	FNBP1L	formin binding protein 1 like [Source:HGNC Symbol;Acc:HGNC:20851]	135331060	135387213	-	8445	downstream
chr4	ALDBSSCT0000007728	ALDBSSCG0000004693	--	Annotated_lncRNA	135322155	135322614	+	ENSSSCT00000007548	ENSSSCG00000006893	BCAR3	breast cancer anti-estrogen resistance 3 [Source:HGNC Symbol;Acc:HGNC:973]	135280375	135321500	+	654	downstream
chr13	LNC_000769	XLOC_045676	--	Novel_lncRNA	143399969	143408358	-	ENSSSCT00000034535	ENSSSCG00000011848	TFRC	transferrin receptor [Source:HGNC Symbol;Acc:HGNC:11763]	143408460	143436489	+	101	upstream
chr13	LNC_000769	XLOC_045676	--	Novel_lncRNA	143399969	143408358	-	ENSSSCT00000034110	ENSSSCG00000011848	TFRC	transferrin receptor [Source:HGNC Symbol;Acc:HGNC:11763]	143412728	143417244	+	4369	upstream
chr13	LNC_000769	XLOC_045676	--	Novel_lncRNA	143399969	143408358	-	ENSSSCT00000012960	ENSSSCG00000011848	TFRC	transferrin receptor [Source:HGNC Symbol;Acc:HGNC:11763]	143409743	143437991	+	1384	upstream
chr13	LNC_000769	XLOC_045676	--	Novel_lncRNA	143399969	143408358	-	ENSSSCT00000033096	ENSSSCG00000011848	TFRC	transferrin receptor [Source:HGNC Symbol;Acc:HGNC:11763]	143409123	143416189	+	764	upstream
chr13	LNC_000768	XLOC_045666	--	Novel_lncRNA	143091070	143115939	-	ENSSSCT00000026267	ENSSSCG00000023527	NRROS	negative regulator of reactive oxygen species [Source:HGNC Symbol;Acc:HGNC:24613]	143119131	143144054	-	3191	downstream
chr13	LNC_000760	XLOC_045055	--	Novel_lncRNA	108047892	108066978	-	ENSSSCT00000033331	ENSSSCG00000011730	IL12A	Interleukin-12 subunit alpha [Source:UniProtKB/Swiss-Prot;Acc:Q29053]	108066800	108074023	+	-179	antisense
chr13	LNC_000760	XLOC_045055	--	Novel_lncRNA	108047892	108066978	-	ENSSSCT00000012840	ENSSSCG00000011730	IL12A	Interleukin-12 subunit alpha [Source:UniProtKB/Swiss-Prot;Acc:Q29053]	108066792	108074477	+	-187	antisense
chr13	LNC_000760	XLOC_045055	--	Novel_lncRNA	108047892	108066978	-	ENSSSCT00000012841	ENSSSCG00000011730	IL12A	Interleukin-12 subunit alpha [Source:UniProtKB/Swiss-Prot;Acc:Q29053]	108066792	108074477	+	-187	antisense
chr13	LNC_000760	XLOC_045055	--	Novel_lncRNA	108047892	108066978	-	ENSSSCT00000033036	ENSSSCG00000011730	IL12A	Interleukin-12 subunit alpha [Source:UniProtKB/Swiss-Prot;Acc:Q29053]	108066800	108074023	+	-179	antisense
chr13	LNC_000767	XLOC_045486	--	Novel_lncRNA	131184121	131185352	-	ENSSSCT00000012888	ENSSSCG00000011776	YEATS2	YEATS domain containing 2 [Source:HGNC Symbol;Acc:HGNC:25489]	131074737	131180554	+	3566	downstream
chr14	ALDBSSCT0000003654	ALDBSSCG0000002185	--	Annotated_lncRNA	78355021	78382745	+	ENSSSCT00000011222	ENSSSCG00000010252	HKDC1	hexokinase domain containing 1 [Source:HGNC Symbol;Acc:HGNC:23302]	78302417	78353321	+	1699	downstream
chr14	ALDBSSCT0000003655	ALDBSSCG0000002186	--	Annotated_lncRNA	80158050	80168486	+	ENSSSCT00000011249	ENSSSCG00000010277	SLC29A3	solute carrier family 29 member 3 [Source:HGNC Symbol;Acc:HGNC:23096]	80113947	80157534	+	515	downstream
chr5	ALDBSSCT0000008384	ALDBSSCG0000005096	--	Annotated_lncRNA	80791830	80798490	+	ENSSSCT00000000880	ENSSSCG00000000811	--	--	80803505	80804803	+	5014	upstream
chr4	ALDBSSCT0000008091	ALDBSSCG0000004910	--	Annotated_lncRNA	110294879	110298186	-	ENSSSCT00000007343	ENSSSCG00000006704	--	--	110281179	110293011	-	1867	upstream
chr7	ENSSSCT00000001522	ENSSSCG00000001396	SLA-8	Annotated_lncRNA	27626992	27630394	-	ENSSSCT00000035331	ENSSSCG00000024161	SLA-7	-	27614074	27617328	+	9663	downstream
chr7	ENSSSCT00000001522	ENSSSCG00000001396	SLA-8	Annotated_lncRNA	27626992	27630394	-	ENSSSCT00000001524	ENSSSCG00000024161	SLA-7	-	27614074	27617558	+	9433	downstream
chr7	ENSSSCT00000001522	ENSSSCG00000001396	SLA-8	Annotated_lncRNA	27626992	27630394	-	ENSSSCT00000001336	ENSSSCG00000024161	SLA-7	-	27614074	27617558	+	9433	downstream
chr4	ALDBSSCT0000007806	ALDBSSCG0000004727	--	Annotated_lncRNA	142931157	142938433	+	ENSSSCT00000007604	ENSSSCG00000006940	CYR61	cysteine rich angiogenic inducer 61 [Source:HGNC Symbol;Acc:HGNC:2654]	142924366	142927632	-	3524	upstream
chr17	LNC_001062	XLOC_063734	--	Novel_lncRNA	52134610	52136162	+	ENSSSCT00000030158	ENSSSCG00000025757	--	--	52126197	52134377	-	232	upstream
chr6	ALDBSSCT0000008704	ALDBSSCG0000005310	--	Annotated_lncRNA	1761884	1765861	+	ENSSSCT00000002944	ENSSSCG00000002653	JPH3	junctophilin 3 [Source:HGNC Symbol;Acc:HGNC:14203]	1766996	1855700	-	1134	downstream
chr6	ALDBSSCT0000008704	ALDBSSCG0000005310	--	Annotated_lncRNA	1761884	1765861	+	ENSSSCT00000002943	ENSSSCG00000002652	KLHDC4	kelch domain containing 4 [Source:HGNC Symbol;Acc:HGNC:25272]	1750798	1760656	+	1227	downstream
chr5	ALDBSSCT0000008251	ALDBSSCG0000005006	--	Annotated_lncRNA	4569319	4572964	+	ENSSSCT00000000074	ENSSSCG00000000068	EP300	E1A binding protein p300 [Source:HGNC Symbol;Acc:HGNC:3373]	4574026	4633622	-	1061	downstream
chr5	ALDBSSCT0000008251	ALDBSSCG0000005006	--	Annotated_lncRNA	4569319	4572964	+	ENSSSCT00000026332	ENSSSCG00000000068	EP300	E1A binding protein p300 [Source:HGNC Symbol;Acc:HGNC:3373]	4574026	4655884	-	1061	downstream
chr13	ALDBSSCT0000003339	ALDBSSCG0000002009	--	Annotated_lncRNA	157173775	157175427	-	ENSSSCT00000024809	ENSSSCG00000027820	CD200	CD200 molecule [Source:HGNC Symbol;Acc:HGNC:7203]	157180878	157193543	-	5450	downstream
chr5	ALDBSSCT0000008252	ALDBSSCG0000005007	--	Annotated_lncRNA	6039841	6041673	+	ENSSSCT00000000089	ENSSSCG00000000083	RPS19BP1	ribosomal protein S19 binding protein 1 [Source:HGNC Symbol;Acc:HGNC:28749]	6034982	6038546	+	1294	downstream
chr5	ALDBSSCT0000008252	ALDBSSCG0000005007	--	Annotated_lncRNA	6039841	6041673	+	ENSSSCT00000000090	ENSSSCG00000000084	ATF4	-	6042582	6044659	-	908	downstream
chr5	ALDBSSCT0000008252	ALDBSSCG0000005007	--	Annotated_lncRNA	6039841	6041673	+	ENSSSCT00000031655	ENSSSCG00000024216	MIEF1	mitochondrial elongation factor 1 [Source:HGNC Symbol;Acc:HGNC:25979]	6047798	6054120	-	6124	downstream
chr3	ALDBSSCT0000006667	ALDBSSCG0000004076	--	Annotated_lncRNA	41484115	41494049	+	ENSSSCT00000008779	ENSSSCG00000008011	GNG13	G protein subunit gamma 13 [Source:HGNC Symbol;Acc:HGNC:14131]	41476392	41476740	-	7374	upstream
chr3	ALDBSSCT0000006667	ALDBSSCG0000004076	--	Annotated_lncRNA	41484115	41494049	+	ENSSSCT00000008778	ENSSSCG00000008010	CHTF18	chromosome transmission fidelity factor 18 [Source:HGNC Symbol;Acc:HGNC:18435]	41468380	41476142	+	7972	downstream
chr3	ALDBSSCT0000006667	ALDBSSCG0000004076	--	Annotated_lncRNA	41484115	41494049	+	ENSSSCT00000031631	ENSSSCG00000008010	CHTF18	chromosome transmission fidelity factor 18 [Source:HGNC Symbol;Acc:HGNC:18435]	41468267	41476142	+	7972	downstream
chr13	ALDBSSCT0000003338	ALDBSSCG0000002008	--	Annotated_lncRNA	156324155	156328974	-	ENSSSCT00000030863	ENSSSCG00000021965	--	--	156315861	156317843	-	6311	upstream
chr2	ALDBSSCT0000005984	ALDBSSCG0000003655	--	Annotated_lncRNA	112804220	112818666	+	ENSSSCT00000025743	ENSSSCG00000024089	C5orf30	chromosome 5 open reading frame 30 [Source:HGNC Symbol;Acc:HGNC:25052]	112821401	112822024	+	2734	upstream
chr3	ALDBSSCT0000006661	ALDBSSCG0000004073	--	Annotated_lncRNA	40681007	40683071	+	ENSSSCT00000030725	ENSSSCG00000028381	--	--	40659339	40673509	-	7497	upstream
chr3	ALDBSSCT0000006661	ALDBSSCG0000004073	--	Annotated_lncRNA	40681007	40683071	+	ENSSSCT00000028658	ENSSSCG00000022630	FLYWCH2	FLYWCH family member 2 [Source:HGNC Symbol;Acc:HGNC:25178]	40683844	40693545	+	772	upstream
chr3	ALDBSSCT0000006525	ALDBSSCG0000003988	--	Annotated_lncRNA	817662	818866	+	ENSSSCT00000008283	ENSSSCG00000007551	GPR146	G protein-coupled receptor 146 [Source:HGNC Symbol;Acc:HGNC:21718]	809111	809866	+	7795	downstream
chr3	ALDBSSCT0000006525	ALDBSSCG0000003988	--	Annotated_lncRNA	817662	818866	+	ENSSSCT00000008284	ENSSSCG00000007552	--	--	823182	824222	+	4315	upstream
chr3	ALDBSSCT0000006525	ALDBSSCG0000003988	--	Annotated_lncRNA	817662	818866	+	ENSSSCT00000022811	ENSSSCG00000026422	GPER1	G protein-coupled estrogen receptor 1 [Source:HGNC Symbol;Acc:HGNC:4485]	828571	833135	+	9704	upstream
chr6	LNC_001669	XLOC_098457	--	Novel_lncRNA	62176671	62184004	-	ENSSSCT00000003747	ENSSSCG00000003377	ACOT7	acyl-CoA thioesterase 7 [Source:HGNC Symbol;Acc:HGNC:24157]	62103735	62176078	-	592	upstream
chr14	ALDBSSCT0000003729	ALDBSSCG0000002231	--	Annotated_lncRNA	117227502	117243637	+	ENSSSCT00000011492	ENSSSCG00000010503	ZNF518A	zinc finger protein 518A [Source:HGNC Symbol;Acc:HGNC:29009]	117246696	117251171	+	3058	upstream
chr6	LNC_001668	XLOC_098365	--	Novel_lncRNA	57967709	57969054	-	ENSSSCT00000003701	ENSSSCG00000003334	UBE2J2	ubiquitin conjugating enzyme E2 J2 [Source:HGNC Symbol;Acc:HGNC:19268]	57969755	57982129	+	700	upstream
chr14	ALDBSSCT0000003723	ALDBSSCG0000002226	--	Annotated_lncRNA	113384170	113403926	+	ENSSSCT00000011457	ENSSSCG00000010469	MARCH5	membrane associated ring-CH-type finger 5 [Source:HGNC Symbol;Acc:HGNC:26025]	113406896	113435560	+	2969	upstream
chr6	ALDBSSCT0000008955	ALDBSSCG0000005482	--	Annotated_lncRNA	81651843	81660219	+	ENSSSCT00000028948	ENSSSCG00000023946	--	--	81644269	81646622	-	5220	upstream
chr7	LNC_001706	XLOC_101377	--	Novel_lncRNA	27555301	27560099	+	ENSSSCT00000001533	ENSSSCG00000001404	TNF	Tumor necrosis factor Tumor necrosis factor, membrane form Intracellular domain 1 Intracellular domain 2 C-domain 1 C-domain 2 Tumor necrosis factor, soluble form [Source:UniProtKB/Swiss-Prot;Acc:P23563]	27549596	27552338	-	2962	upstream
chr7	LNC_001706	XLOC_101377	--	Novel_lncRNA	27555301	27560099	+	ENSSSCT00000032883	ENSSSCG00000001405	LTB	lymphotoxin beta [Source:HGNC Symbol;Acc:HGNC:6711]	27545253	27547161	+	8139	downstream
chr7	LNC_001706	XLOC_101377	--	Novel_lncRNA	27555301	27560099	+	ENSSSCT00000001535	ENSSSCG00000001405	LTB	lymphotoxin beta [Source:HGNC Symbol;Acc:HGNC:6711]	27545252	27547161	+	8139	downstream
chr7	LNC_001706	XLOC_101377	--	Novel_lncRNA	27555301	27560099	+	ENSSSCT00000035081	ENSSSCG00000001405	LTB	lymphotoxin beta [Source:HGNC Symbol;Acc:HGNC:6711]	27545251	27547161	+	8139	downstream
chr7	LNC_001706	XLOC_101377	--	Novel_lncRNA	27555301	27560099	+	ENSSSCT00000001531	ENSSSCG00000001402	NFKBIL1	NFKB inhibitor like 1 [Source:HGNC Symbol;Acc:HGNC:7800]	27566956	27578071	-	6856	downstream
chr7	LNC_001706	XLOC_101377	--	Novel_lncRNA	27555301	27560099	+	ENSSSCT00000001532	ENSSSCG00000001403	LTA	Lymphotoxin-alpha [Source:UniProtKB/Swiss-Prot;Acc:P26445]	27553711	27555858	-	-558	antisense
chr7	LNC_001706	XLOC_101377	--	Novel_lncRNA	27555301	27560099	+	ENSSSCT00000034506	ENSSSCG00000001403	LTA	Lymphotoxin-alpha [Source:UniProtKB/Swiss-Prot;Acc:P26445]	27553711	27555626	-	-326	antisense
chr15	ALDBSSCT0000004580	ALDBSSCG0000002784	--	Annotated_lncRNA	117344949	117350079	-	ENSSSCT00000029321	ENSSSCG00000022225	NOP58	NOP58 ribonucleoprotein [Source:HGNC Symbol;Acc:HGNC:29926]	117351067	117375010	+	987	upstream
chr7	LNC_001704	XLOC_101359	--	Novel_lncRNA	27090911	27095840	+	ENSSSCT00000001504	ENSSSCG00000001382	DDR1	discoidin domain receptor tyrosine kinase 1 [Source:HGNC Symbol;Acc:HGNC:2730]	27099380	27113809	+	3539	upstream
chr7	LNC_001704	XLOC_101359	--	Novel_lncRNA	27090911	27095840	+	ENSSSCT00000035471	ENSSSCG00000001382	DDR1	discoidin domain receptor tyrosine kinase 1 [Source:HGNC Symbol;Acc:HGNC:2730]	27099411	27113809	+	3570	upstream
chr7	LNC_001704	XLOC_101359	--	Novel_lncRNA	27090911	27095840	+	ENSSSCT00000035030	ENSSSCG00000001382	DDR1	discoidin domain receptor tyrosine kinase 1 [Source:HGNC Symbol;Acc:HGNC:2730]	27099380	27113809	+	3539	upstream
chr7	LNC_001704	XLOC_101359	--	Novel_lncRNA	27090911	27095840	+	ENSSSCT00000035930	ENSSSCG00000001382	DDR1	discoidin domain receptor tyrosine kinase 1 [Source:HGNC Symbol;Acc:HGNC:2730]	27099411	27113809	+	3570	upstream
chr7	LNC_001705	XLOC_101377	--	Novel_lncRNA	27555296	27560099	+	ENSSSCT00000001533	ENSSSCG00000001404	TNF	Tumor necrosis factor Tumor necrosis factor, membrane form Intracellular domain 1 Intracellular domain 2 C-domain 1 C-domain 2 Tumor necrosis factor, soluble form [Source:UniProtKB/Swiss-Prot;Acc:P23563]	27549596	27552338	-	2957	upstream
chr7	LNC_001705	XLOC_101377	--	Novel_lncRNA	27555296	27560099	+	ENSSSCT00000032883	ENSSSCG00000001405	LTB	lymphotoxin beta [Source:HGNC Symbol;Acc:HGNC:6711]	27545253	27547161	+	8134	downstream
chr7	LNC_001705	XLOC_101377	--	Novel_lncRNA	27555296	27560099	+	ENSSSCT00000001535	ENSSSCG00000001405	LTB	lymphotoxin beta [Source:HGNC Symbol;Acc:HGNC:6711]	27545252	27547161	+	8134	downstream
chr7	LNC_001705	XLOC_101377	--	Novel_lncRNA	27555296	27560099	+	ENSSSCT00000035081	ENSSSCG00000001405	LTB	lymphotoxin beta [Source:HGNC Symbol;Acc:HGNC:6711]	27545251	27547161	+	8134	downstream
chr7	LNC_001705	XLOC_101377	--	Novel_lncRNA	27555296	27560099	+	ENSSSCT00000001531	ENSSSCG00000001402	NFKBIL1	NFKB inhibitor like 1 [Source:HGNC Symbol;Acc:HGNC:7800]	27566956	27578071	-	6856	downstream
chr7	LNC_001705	XLOC_101377	--	Novel_lncRNA	27555296	27560099	+	ENSSSCT00000001532	ENSSSCG00000001403	LTA	Lymphotoxin-alpha [Source:UniProtKB/Swiss-Prot;Acc:P26445]	27553711	27555858	-	-563	antisense
chr7	LNC_001705	XLOC_101377	--	Novel_lncRNA	27555296	27560099	+	ENSSSCT00000034506	ENSSSCG00000001403	LTA	Lymphotoxin-alpha [Source:UniProtKB/Swiss-Prot;Acc:P26445]	27553711	27555626	-	-331	antisense
chr7	LNC_001702	XLOC_101208	--	Novel_lncRNA	22259659	22272036	+	ENSSSCT00000001227	ENSSSCG00000001131	--	--	22275360	22288678	+	3323	upstream
chr7	LNC_001700	XLOC_101208	--	Novel_lncRNA	22252491	22272036	+	ENSSSCT00000027212	ENSSSCG00000028147	--	--	22246752	22247742	-	4748	upstream
chr7	LNC_001700	XLOC_101208	--	Novel_lncRNA	22252491	22272036	+	ENSSSCT00000001227	ENSSSCG00000001131	--	--	22275360	22288678	+	3323	upstream
chr7	LNC_001701	XLOC_101208	--	Novel_lncRNA	22259659	22272036	+	ENSSSCT00000001227	ENSSSCG00000001131	--	--	22275360	22288678	+	3323	upstream
chr6	ALDBSSCT0000008897	ALDBSSCG0000005438	--	Annotated_lncRNA	57881482	57884588	+	ENSSSCT00000024617	ENSSSCG00000023973	--	--	57886829	57898138	-	2240	downstream
chr6	ALDBSSCT0000008897	ALDBSSCG0000005438	--	Annotated_lncRNA	57881482	57884588	+	ENSSSCT00000026215	ENSSSCG00000022204	--	--	57851225	57880810	-	671	upstream
chr6	ALDBSSCT0000008896	ALDBSSCG0000005437	--	Annotated_lncRNA	57734638	57735914	+	ENSSSCT00000027815	ENSSSCG00000027987	ZNF132	zinc finger protein 132 [Source:HGNC Symbol;Acc:HGNC:12916]	57737839	57741481	-	1924	downstream
chr6	ALDBSSCT0000008896	ALDBSSCG0000005437	--	Annotated_lncRNA	57734638	57735914	+	ENSSSCT00000029564	ENSSSCG00000027987	ZNF132	zinc finger protein 132 [Source:HGNC Symbol;Acc:HGNC:12916]	57737791	57741493	-	1876	downstream
chrX	LNC_002020	XLOC_120991	--	Novel_lncRNA	122321545	122331800	+	ENSSSCT00000029951	ENSSSCG00000012655	BCORL1	BCL6 corepressor-like 1 [Source:HGNC Symbol;Acc:HGNC:25657]	122332162	122381559	+	361	upstream
chrX	LNC_002020	XLOC_120991	--	Novel_lncRNA	122321545	122331800	+	ENSSSCT00000013836	ENSSSCG00000012655	BCORL1	BCL6 corepressor-like 1 [Source:HGNC Symbol;Acc:HGNC:25657]	122332162	122381559	+	361	upstream
chr7	LNC_001708	XLOC_101434	--	Novel_lncRNA	29549548	29555816	+	ENSSSCT00000001638	ENSSSCG00000001472	SLA-DOA	major histocompatibility complex, class II, DO alpha [Source:HGNC Symbol;Acc:HGNC:4936]	29545479	29549278	-	269	upstream
chrX	ALDBSSCT0000011977	ALDBSSCG0000007292	--	Annotated_lncRNA	131140564	131288647	+	ENSSSCT00000024126	ENSSSCG00000022501	SOX3	SRY-box 3 [Source:HGNC Symbol;Acc:HGNC:11199]	131290256	131292430	-	1608	downstream
chr3	ALDBSSCT0000007037	ALDBSSCG0000004283	--	Annotated_lncRNA	18045080	18049993	-	ENSSSCT00000008527	ENSSSCG00000007780	ZNF629	zinc finger protein 629 [Source:HGNC Symbol;Acc:HGNC:29008]	18056271	18065361	+	6277	upstream
chr3	ALDBSSCT0000007033	ALDBSSCG0000004279	--	Annotated_lncRNA	17042358	17056143	-	ENSSSCT00000008487	ENSSSCG00000007741	NUPR2	nuclear protein 2, transcriptional regulator [Source:HGNC Symbol;Acc:HGNC:44164]	17059600	17059908	+	3456	upstream
chr3	ALDBSSCT0000007033	ALDBSSCG0000004279	--	Annotated_lncRNA	17042358	17056143	-	ENSSSCT00000008489	ENSSSCG00000007743	CHCHD2	coiled-coil-helix-coiled-coil-helix domain containing 2 [Source:HGNC Symbol;Acc:HGNC:21645]	17064654	17071903	+	8510	upstream
chr6	ALDBSSCT0000008870	ALDBSSCG0000005420	--	Annotated_lncRNA	52055851	52063194	+	ENSSSCT00000003603	ENSSSCG00000003243	--	--	52011706	52051380	+	4470	downstream
chr6	LNC_001662	XLOC_097893	--	Novel_lncRNA	44263061	44298491	-	ENSSSCT00000022919	ENSSSCG00000028036	MAP3K10	mitogen-activated protein kinase kinase kinase 10 [Source:HGNC Symbol;Acc:HGNC:6849]	44298637	44316744	+	145	upstream
chr13	ALDBSSCT0000003346	ALDBSSCG0000002013	--	Annotated_lncRNA	160470294	160477435	-	ENSSSCT00000013068	ENSSSCG00000011942	CD47	leukocyte surface antigen CD47 precursor [Source:RefSeq peptide;Acc:NP_999147]	160478687	160518107	-	1251	downstream
chr13	ALDBSSCT0000003347	ALDBSSCG0000002013	--	Annotated_lncRNA	160470294	160477475	-	ENSSSCT00000013068	ENSSSCG00000011942	CD47	leukocyte surface antigen CD47 precursor [Source:RefSeq peptide;Acc:NP_999147]	160478687	160518107	-	1211	downstream
chr6	ALDBSSCT0000008879	ALDBSSCG0000005426	--	Annotated_lncRNA	54602687	54608041	+	ENSSSCT00000022447	ENSSSCG00000029007	--	--	54614150	54617236	-	6108	downstream
chr12	ALDBSSCT0000002295	ALDBSSCG0000001381	--	Annotated_lncRNA	58106679	58109606	+	ENSSSCT00000019601	ENSSSCG00000018007	MYH3	myosin heavy chain 3 [Source:HGNC Symbol;Acc:HGNC:7573]	58110959	58132945	+	1352	upstream
chr1	LNC_000381	XLOC_023742	--	Novel_lncRNA	117517791	117523319	-	ENSSSCT00000005017	ENSSSCG00000004542	NARS	asparaginyl-tRNA synthetase [Source:HGNC Symbol;Acc:HGNC:7643]	117493535	117509485	+	8305	downstream
chr6	LNC_001666	XLOC_098234	--	Novel_lncRNA	53449536	53451010	-	ENSSSCT00000003632	ENSSSCG00000003271	TTYH1	tweety family member 1 [Source:HGNC Symbol;Acc:HGNC:13476]	53428011	53443243	-	6292	upstream
chr6	LNC_001666	XLOC_098234	--	Novel_lncRNA	53449536	53451010	-	ENSSSCT00000025769	ENSSSCG00000003271	TTYH1	tweety family member 1 [Source:HGNC Symbol;Acc:HGNC:13476]	53428838	53443243	-	6292	upstream
chr16	LNC_001019	XLOC_061047	--	Novel_lncRNA	25507616	25514644	-	ENSSSCT00000034777	ENSSSCG00000016855	FYB	FYN binding protein [Source:HGNC Symbol;Acc:HGNC:4036]	25520662	25574953	-	6017	downstream
chr16	LNC_001019	XLOC_061047	--	Novel_lncRNA	25507616	25514644	-	ENSSSCT00000018355	ENSSSCG00000016855	FYB	FYN binding protein [Source:HGNC Symbol;Acc:HGNC:4036]	25516199	25621534	-	1554	downstream
chr16	LNC_001019	XLOC_061047	--	Novel_lncRNA	25507616	25514644	-	ENSSSCT00000018353	ENSSSCG00000016853	RICTOR	RPTOR independent companion of MTOR complex 2 [Source:HGNC Symbol;Acc:HGNC:28611]	25361448	25498073	-	9542	upstream
chr16	LNC_001019	XLOC_061047	--	Novel_lncRNA	25507616	25514644	-	ENSSSCT00000035208	ENSSSCG00000016855	FYB	FYN binding protein [Source:HGNC Symbol;Acc:HGNC:4036]	25520145	25621382	-	5500	downstream
chr11	LNC_000545	XLOC_033458	--	Novel_lncRNA	16708135	16713971	-	ENSSSCT00000010282	ENSSSCG00000009384	INTS6	integrator complex subunit 6 [Source:HGNC Symbol;Acc:HGNC:14879]	16714802	16807111	+	830	upstream
chr11	LNC_000544	XLOC_033337	--	Novel_lncRNA	14709796	14710602	-	ENSSSCT00000010266	ENSSSCG00000009369	COG6	component of oligomeric golgi complex 6 [Source:HGNC Symbol;Acc:HGNC:18621]	14710678	14892681	+	75	upstream
chr11	LNC_000549	XLOC_033555	--	Novel_lncRNA	20988486	20991388	-	ENSSSCT00000010306	ENSSSCG00000009407	ESD	esterase D [Source:HGNC Symbol;Acc:HGNC:3465]	20991647	21011979	+	258	upstream
chr3	ALDBSSCT0000007104	ALDBSSCG0000004320	--	Annotated_lncRNA	38671575	38672086	-	ENSSSCT00000008694	ENSSSCG00000007932	ROGDI	rogdi homolog [Source:HGNC Symbol;Acc:HGNC:29478]	38665047	38671059	+	515	downstream
chr3	ALDBSSCT0000007104	ALDBSSCG0000004320	--	Annotated_lncRNA	38671575	38672086	-	ENSSSCT00000008695	ENSSSCG00000007933	SEPT12	septin 12 [Source:HGNC Symbol;Acc:HGNC:26348]	38677800	38688095	+	5713	upstream
chr3	ALDBSSCT0000007104	ALDBSSCG0000004320	--	Annotated_lncRNA	38671575	38672086	-	ENSSSCT00000008693	ENSSSCG00000007931	GLYR1	glyoxylate reductase 1 homolog [Source:HGNC Symbol;Acc:HGNC:24434]	38626505	38662506	+	9068	downstream
chr3	ALDBSSCT0000007104	ALDBSSCG0000004320	--	Annotated_lncRNA	38671575	38672086	-	ENSSSCT00000030382	ENSSSCG00000007931	GLYR1	glyoxylate reductase 1 homolog [Source:HGNC Symbol;Acc:HGNC:24434]	38626505	38662506	+	9068	downstream
chr3	ALDBSSCT0000007105	ALDBSSCG0000004321	--	Annotated_lncRNA	38752730	38753721	-	ENSSSCT00000008701	ENSSSCG00000007939	ANKS3	ankyrin repeat and sterile alpha motif domain containing 3 [Source:HGNC Symbol;Acc:HGNC:29422]	38730150	38751123	+	1606	downstream
chr3	ALDBSSCT0000007105	ALDBSSCG0000004321	--	Annotated_lncRNA	38752730	38753721	-	ENSSSCT00000008691	ENSSSCG00000007930	MGRN1	mahogunin ring finger 1 [Source:HGNC Symbol;Acc:HGNC:20254]	38754536	38806662	-	814	downstream
chr3	ALDBSSCT0000007105	ALDBSSCG0000004321	--	Annotated_lncRNA	38752730	38753721	-	ENSSSCT00000024824	ENSSSCG00000024695	NUDT16L1	nudix hydrolase 16 like 1 [Source:HGNC Symbol;Acc:HGNC:28154]	38749604	38751042	-	1687	upstream
GL893006.1	ALDBSSCT0000011804	ALDBSSCG0000007163	--	Annotated_lncRNA	27220	28222	+	ENSSSCT00000022719	ENSSSCG00000026670	--	--	1371	22655	+	4564	downstream
chr3	ALDBSSCT0000007107	ALDBSSCG0000004323	--	Annotated_lncRNA	39866204	39914443	-	ENSSSCT00000008716	ENSSSCG00000007953	DNASE1	deoxyribonuclease 1 [Source:HGNC Symbol;Acc:HGNC:2956]	39862785	39865618	-	585	upstream
chr3	ALDBSSCT0000007107	ALDBSSCG0000004323	--	Annotated_lncRNA	39866204	39914443	-	ENSSSCT00000008715	ENSSSCG00000007952	TRAP1	TNF receptor-associated protein 1 [Source:RefSeq peptide;Acc:NP_001230874]	39804652	39862836	+	3367	downstream
chr3	ALDBSSCT0000007108	ALDBSSCG0000004324	--	Annotated_lncRNA	39990123	39990716	-	ENSSSCT00000008717	ENSSSCG00000007954	SLX4	SLX4 structure-specific endonuclease subunit [Source:HGNC Symbol;Acc:HGNC:23845]	39969677	39988141	+	1981	downstream
chr2	ALDBSSCT0000006453	ALDBSSCG0000003937	--	Annotated_lncRNA	140550670	140552295	-	ENSSSCT00000015607	ENSSSCG00000014284	CCNI2	cyclin I family member 2 [Source:HGNC Symbol;Acc:HGNC:33869]	140542665	140547652	+	3017	downstream
chr2	ALDBSSCT0000006453	ALDBSSCG0000003937	--	Annotated_lncRNA	140550670	140552295	-	ENSSSCT00000015608	ENSSSCG00000014285	SEPT8	septin 8 [Source:HGNC Symbol;Acc:HGNC:16511]	140556381	140561689	-	4085	downstream
chr2	ALDBSSCT0000006453	ALDBSSCG0000003937	--	Annotated_lncRNA	140550670	140552295	-	ENSSSCT00000029548	ENSSSCG00000014284	CCNI2	cyclin I family member 2 [Source:HGNC Symbol;Acc:HGNC:33869]	140542665	140547652	+	3017	downstream
chrX	ENSSSCT00000033443	ENSSSCG00000030824	CH242-82O13.1	Annotated_lncRNA	46393051	46417099	-	ENSSSCT00000013414	ENSSSCG00000012267	JADE3	jade family PHD finger 3 [Source:HGNC Symbol;Acc:HGNC:22982]	46416884	46551716	+	-216	antisense
chrX	ENSSSCT00000033443	ENSSSCG00000030824	CH242-82O13.1	Annotated_lncRNA	46393051	46417099	-	ENSSSCT00000033102	ENSSSCG00000012267	JADE3	jade family PHD finger 3 [Source:HGNC Symbol;Acc:HGNC:22982]	46417174	46551692	+	74	upstream
chr2	ALDBSSCT0000006180	ALDBSSCG0000003778	--	Annotated_lncRNA	12903561	12909123	-	ENSSSCT00000014398	ENSSSCG00000013178	ZDHHC5	zinc finger DHHC-type containing 5 [Source:HGNC Symbol;Acc:HGNC:18472]	12884998	12902901	-	659	upstream
chr2	ALDBSSCT0000006180	ALDBSSCG0000003778	--	Annotated_lncRNA	12903561	12909123	-	ENSSSCT00000014399	ENSSSCG00000013179	CLP1	cleavage and polyadenylation factor I subunit 1 [Source:HGNC Symbol;Acc:HGNC:16999]	12915354	12918379	-	6230	downstream
chr2	ALDBSSCT0000006186	ALDBSSCG0000003783	--	Annotated_lncRNA	17279820	17308005	-	ENSSSCT00000014482	ENSSSCG00000013258	HARBI1	harbinger transposase derived 1 [Source:HGNC Symbol;Acc:HGNC:26522]	17267858	17277462	+	2357	downstream
chr2	ALDBSSCT0000006186	ALDBSSCG0000003783	--	Annotated_lncRNA	17279820	17308005	-	ENSSSCT00000014486	ENSSSCG00000013262	AMBRA1	autophagy and beclin 1 regulator 1 [Source:HGNC Symbol;Acc:HGNC:25990]	17313888	17465140	+	5882	upstream
chr17	ALDBSSCT0000005362	ALDBSSCG0000003244	--	Annotated_lncRNA	49199755	49202225	-	ENSSSCT00000008047	ENSSSCG00000007355	TOP1	topoisomerase (DNA) I [Source:HGNC Symbol;Acc:HGNC:11986]	49135521	49192392	+	7362	downstream
chr17	ALDBSSCT0000005362	ALDBSSCG0000003244	--	Annotated_lncRNA	49199755	49202225	-	ENSSSCT00000008048	ENSSSCG00000007356	PLCG1	phospholipase C gamma 1 [Source:HGNC Symbol;Acc:HGNC:9065]	49203288	49238376	+	1062	upstream
chr17	ALDBSSCT0000005362	ALDBSSCG0000003244	--	Annotated_lncRNA	49199755	49202225	-	ENSSSCT00000029351	ENSSSCG00000007355	TOP1	topoisomerase (DNA) I [Source:HGNC Symbol;Acc:HGNC:11986]	49135521	49192344	+	7410	downstream
chr13	ALDBSSCT0000002740	ALDBSSCG0000001661	--	Annotated_lncRNA	98830069	98837979	+	ENSSSCT00000012820	ENSSSCG00000011710	EIF2A	eukaryotic translation initiation factor 2A [Source:HGNC Symbol;Acc:HGNC:3254]	98845701	98862686	-	7721	downstream
chr13	ALDBSSCT0000002740	ALDBSSCG0000001661	--	Annotated_lncRNA	98830069	98837979	+	ENSSSCT00000028119	ENSSSCG00000028477	SERP1	stress-associated endoplasmic reticulum protein 1 [Source:HGNC Symbol;Acc:HGNC:10759]	98827874	98829536	-	532	upstream
chr17	ALDBSSCT0000005169	ALDBSSCG0000003121	--	Annotated_lncRNA	46589704	46590431	+	ENSSSCT00000031001	ENSSSCG00000023522	TGM2	transglutaminase 2 [Source:HGNC Symbol;Acc:HGNC:11778]	46592136	46629982	+	1704	upstream
chr3	LNC_001374	XLOC_081531	--	Novel_lncRNA	127281841	127542509	-	ENSSSCT00000009419	ENSSSCG00000008608	RDH14	retinol dehydrogenase 14 (all-trans/9-cis/11-cis) [Source:HGNC Symbol;Acc:HGNC:19979]	127542572	127547856	+	62	upstream
chr3	LNC_001373	XLOC_081531	--	Novel_lncRNA	127277743	127542509	-	ENSSSCT00000009419	ENSSSCG00000008608	RDH14	retinol dehydrogenase 14 (all-trans/9-cis/11-cis) [Source:HGNC Symbol;Acc:HGNC:19979]	127542572	127547856	+	62	upstream
chr3	LNC_001372	XLOC_081531	--	Novel_lncRNA	127182610	127542509	-	ENSSSCT00000009419	ENSSSCG00000008608	RDH14	retinol dehydrogenase 14 (all-trans/9-cis/11-cis) [Source:HGNC Symbol;Acc:HGNC:19979]	127542572	127547856	+	62	upstream
chr18	ALDBSSCT0000005638	ALDBSSCG0000003417	--	Annotated_lncRNA	7716921	7719914	-	ENSSSCT00000029092	ENSSSCG00000016475	--	--	7722752	7744123	-	2837	downstream
chr18	ALDBSSCT0000005638	ALDBSSCG0000003417	--	Annotated_lncRNA	7716921	7719914	-	ENSSSCT00000025084	ENSSSCG00000016475	--	--	7722752	7730334	-	2837	downstream
chr18	ALDBSSCT0000005638	ALDBSSCG0000003417	--	Annotated_lncRNA	7716921	7719914	-	ENSSSCT00000017939	ENSSSCG00000016475	--	--	7724092	7744165	-	4177	downstream
chr17	ALDBSSCT0000005166	ALDBSSCG0000003118	--	Annotated_lncRNA	45252820	45254941	+	ENSSSCT00000023008	ENSSSCG00000024230	MYL9	Myosin regulatory light polypeptide 9 [Source:UniProtKB/Swiss-Prot;Acc:P29269]	45264861	45272225	+	9919	upstream
chr17	ALDBSSCT0000005166	ALDBSSCG0000003118	--	Annotated_lncRNA	45252820	45254941	+	ENSSSCT00000008007	ENSSSCG00000007317	DLGAP4	DLG associated protein 4 [Source:HGNC Symbol;Acc:HGNC:24476]	45198643	45251078	+	1741	downstream
chr2	LNC_001170	XLOC_070482	--	Novel_lncRNA	120817526	120830578	+	ENSSSCT00000015517	ENSSSCG00000014202	STARD4	stAR-related lipid transfer protein 4 [Source:RefSeq peptide;Acc:NP_001137198]	120830523	120845745	-	-56	antisense
chr2	LNC_001170	XLOC_070482	--	Novel_lncRNA	120817526	120830578	+	ENSSSCT00000031715	ENSSSCG00000023497	--	--	120787641	120817434	+	91	downstream
chr2	LNC_001174	XLOC_070777	--	Novel_lncRNA	130862235	130890523	+	ENSSSCT00000031934	ENSSSCG00000022656	SRFBP1	serum response factor binding protein 1 [Source:HGNC Symbol;Acc:HGNC:26333]	130800500	130862131	+	103	downstream
chr2	LNC_001174	XLOC_070777	--	Novel_lncRNA	130862235	130890523	+	ENSSSCT00000015550	ENSSSCG00000014232	LOX	lysyl oxidase precursor [Source:RefSeq peptide;Acc:NP_001193332]	130891092	130900428	-	568	downstream
chr2	LNC_001177	XLOC_070886	--	Novel_lncRNA	137174874	137179650	+	ENSSSCT00000015578	ENSSSCG00000014257	SLC27A6	solute carrier family 27 member 6 [Source:HGNC Symbol;Acc:HGNC:11000]	137112357	137174709	+	164	downstream
chr2	LNC_001179	XLOC_070890	--	Novel_lncRNA	137287906	137453082	+	ENSSSCT00000015580	ENSSSCG00000014259	--	--	137455203	137519461	+	2120	upstream
chr2	LNC_001178	XLOC_070890	--	Novel_lncRNA	137287886	137453082	+	ENSSSCT00000015580	ENSSSCG00000014259	--	--	137455203	137519461	+	2120	upstream
chr2	ALDBSSCT0000005769	ALDBSSCG0000003505	--	Annotated_lncRNA	1464623	1467783	+	ENSSSCT00000028464	ENSSSCG00000022579	--	--	1469314	1477594	+	1530	upstream
chr14	ALDBSSCT0000003905	ALDBSSCG0000002347	--	Annotated_lncRNA	49655106	49657660	-	ENSSSCT00000010945	ENSSSCG00000009988	NIPSNAP1	nipsnap homolog 1 (C. elegans) [Source:HGNC Symbol;Acc:HGNC:7827]	49658212	49675678	-	551	downstream
chr14	ALDBSSCT0000003907	ALDBSSCG0000002348	--	Annotated_lncRNA	49679350	49685602	-	ENSSSCT00000010945	ENSSSCG00000009988	NIPSNAP1	nipsnap homolog 1 (C. elegans) [Source:HGNC Symbol;Acc:HGNC:7827]	49658212	49675678	-	3671	upstream
chr14	ALDBSSCT0000003907	ALDBSSCG0000002348	--	Annotated_lncRNA	49679350	49685602	-	ENSSSCT00000010943	ENSSSCG00000028707	--	--	49688038	49758063	+	2435	upstream
chr11	ALDBSSCT0000001886	ALDBSSCG0000001141	--	Annotated_lncRNA	6809063	6819486	-	ENSSSCT00000010220	ENSSSCG00000009326	KATNAL1	katanin catalytic subunit A1 like 1 [Source:HGNC Symbol;Acc:HGNC:28361]	6760617	6803995	-	5067	upstream
GL895036.1	LNC_000150	XLOC_008832	--	Novel_lncRNA	1905	5069	-	ENSSSCT00000024544	ENSSSCG00000020754	CD3EAP	CD3e molecule associated protein [Source:HGNC Symbol;Acc:HGNC:24219]	5338	7983	+	268	upstream
chr11	ALDBSSCT0000001860	ALDBSSCG0000001123	--	Annotated_lncRNA	2472141	2478631	-	ENSSSCT00000010182	ENSSSCG00000009294	--	--	2479151	2479882	-	519	downstream
GL895140.1	LNC_000153	XLOC_009091	--	Novel_lncRNA	166	574	+	ENSSSCT00000016093	ENSSSCG00000014742	--	--	8725	10199	-	8150	downstream
GL895140.1	LNC_000153	XLOC_009091	--	Novel_lncRNA	166	574	+	ENSSSCT00000027463	ENSSSCG00000014742	--	--	9114	10223	-	8539	downstream
chr11	ALDBSSCT0000001865	ALDBSSCG0000001128	--	Annotated_lncRNA	3470218	3471113	-	ENSSSCT00000024194	ENSSSCG00000024064	RNF6	ring finger protein 6 [Source:HGNC Symbol;Acc:HGNC:10069]	3460894	3467502	-	2715	upstream
chr1	ALDBSSCT0000000849	ALDBSSCG0000000514	--	Annotated_lncRNA	155388524	155395554	-	ENSSSCT00000005322	ENSSSCG00000004820	LINS1	lines homolog 1 [Source:HGNC Symbol;Acc:HGNC:30922]	155373142	155381352	-	7171	upstream
chr1	ALDBSSCT0000000849	ALDBSSCG0000000514	--	Annotated_lncRNA	155388524	155395554	-	ENSSSCT00000028739	ENSSSCG00000004820	LINS1	lines homolog 1 [Source:HGNC Symbol;Acc:HGNC:30922]	155373142	155381328	-	7195	upstream
chr11	ALDBSSCT0000001868	ALDBSSCG0000001131	--	Annotated_lncRNA	4112459	4192013	-	ENSSSCT00000010191	ENSSSCG00000009303	--	--	4197546	4202234	+	5532	upstream
chr1	ALDBSSCT0000000847	ALDBSSCG0000000512	--	Annotated_lncRNA	154049974	154057648	-	ENSSSCT00000023715	ENSSSCG00000029613	SYNM	synemin [Source:HGNC Symbol;Acc:HGNC:24466]	154019851	154044632	+	5341	downstream
chr1	ALDBSSCT0000000847	ALDBSSCG0000000512	--	Annotated_lncRNA	154049974	154057648	-	ENSSSCT00000005313	ENSSSCG00000004813	TTC23	tetratricopeptide repeat domain 23 [Source:HGNC Symbol;Acc:HGNC:25730]	154058346	154169686	-	697	downstream
chr2	ALDBSSCT0000006272	ALDBSSCG0000003834	--	Annotated_lncRNA	49220742	49256853	-	ENSSSCT00000014632	ENSSSCG00000013395	BTBD10	BTB domain containing 10 [Source:HGNC Symbol;Acc:HGNC:21445]	49163323	49215258	-	5483	upstream
chr2	ALDBSSCT0000006077	ALDBSSCG0000003720	--	Annotated_lncRNA	150076648	150125301	+	ENSSSCT00000015735	ENSSSCG00000014397	SPRY4	sprouty RTK signaling antagonist 4 [Source:HGNC Symbol;Acc:HGNC:15533]	150066068	150066967	-	9680	upstream
chr2	ALDBSSCT0000006070	ALDBSSCG0000003717	--	Annotated_lncRNA	149151793	149156337	+	ENSSSCT00000029957	ENSSSCG00000028168	TAF7	TATA-box binding protein associated factor 7 [Source:HGNC Symbol;Acc:HGNC:11541]	149149921	149150970	-	822	upstream
chr2	ALDBSSCT0000006070	ALDBSSCG0000003717	--	Annotated_lncRNA	149151793	149156337	+	ENSSSCT00000029817	ENSSSCG00000027371	PCDHGA1	protocadherin gamma subfamily A, 1 [Source:HGNC Symbol;Acc:HGNC:8696]	149165262	149168015	+	8924	upstream
chr6	ALDBSSCT0000009461	ALDBSSCG0000005770	--	Annotated_lncRNA	90721672	90724653	-	ENSSSCT00000027299	ENSSSCG00000028126	MPPE1	metallophosphoesterase 1 [Source:HGNC Symbol;Acc:HGNC:15988]	90704267	90714316	-	7355	upstream
chr1	ALDBSSCT0000000826	ALDBSSCG0000000500	--	Annotated_lncRNA	146460084	146463647	-	ENSSSCT00000024247	ENSSSCG00000027069	--	--	146448917	146451468	-	8615	upstream
chr1	ALDBSSCT0000000826	ALDBSSCG0000000500	--	Annotated_lncRNA	146460084	146463647	-	ENSSSCT00000005284	ENSSSCG00000004785	--	--	146465868	146470277	-	2220	downstream
chr9	LNC_001955	XLOC_116683	--	Novel_lncRNA	22508113	22515230	-	ENSSSCT00000031507	ENSSSCG00000021210	--	--	22493189	22501615	-	6497	upstream
chr9	LNC_001954	XLOC_116640	--	Novel_lncRNA	22070830	22076262	-	ENSSSCT00000016268	ENSSSCG00000014912	CCDC83	coiled-coil domain containing 83 [Source:HGNC Symbol;Acc:HGNC:28535]	22060860	22087186	+	-5433	antisense
chr9	LNC_001959	XLOC_116846	--	Novel_lncRNA	29559645	29562905	-	ENSSSCT00000026907	ENSSSCG00000025995	--	--	29559009	29559484	+	160	downstream
chr9	LNC_001959	XLOC_116846	--	Novel_lncRNA	29559645	29562905	-	ENSSSCT00000016300	ENSSSCG00000014942	--	--	29570691	29572575	-	7785	downstream
chr4	ALDBSSCT0000007414	ALDBSSCG0000004493	--	Annotated_lncRNA	2167846	2169852	+	ENSSSCT00000029251	ENSSSCG00000026625	PTK2	-	2172319	2264142	-	2466	downstream
chr4	ALDBSSCT0000007414	ALDBSSCG0000004493	--	Annotated_lncRNA	2167846	2169852	+	ENSSSCT00000032996	ENSSSCG00000026625	PTK2	-	2173289	2245440	-	3436	downstream
GL892813.1	LNC_000029	XLOC_001691	--	Novel_lncRNA	30327	37498	+	ENSSSCT00000028747	ENSSSCG00000027015	FAM57B	family with sequence similarity 57 member B [Source:HGNC Symbol;Acc:HGNC:25295]	29783	36771	-	-6445	antisense
chr17	ALDBSSCT0000005180	ALDBSSCG0000003126	--	Annotated_lncRNA	47214004	47215890	+	ENSSSCT00000008041	ENSSSCG00000007349	ACTR5	ARP5 actin-related protein 5 homolog [Source:HGNC Symbol;Acc:HGNC:14671]	47193722	47213176	+	827	downstream
chr8	ALDBSSCT0000010431	ALDBSSCG0000006337	--	Annotated_lncRNA	30428890	30498320	+	ENSSSCT00000009595	ENSSSCG00000008770	NWD2	NACHT and WD repeat domain containing 2 [Source:HGNC Symbol;Acc:HGNC:29229]	30403815	30422795	+	6094	downstream
chr4	LNC_001392	XLOC_082636	--	Novel_lncRNA	44917474	44918930	+	ENSSSCT00000006684	ENSSSCG00000006093	NDUFAF6	NADH:ubiquinone oxidoreductase complex assembly factor 6 [Source:HGNC Symbol;Acc:HGNC:28625]	44871760	44907590	-	9883	upstream
chr4	LNC_001394	XLOC_083082	--	Novel_lncRNA	74331728	74350047	+	ENSSSCT00000032095	ENSSSCG00000027872	--	--	74317791	74325604	+	6123	downstream
chr7	ALDBSSCT0000010182	ALDBSSCG0000006201	--	Annotated_lncRNA	63137959	63207185	-	ENSSSCT00000026577	ENSSSCG00000027478	PPCDC	phosphopantothenoylcysteine decarboxylase [Source:HGNC Symbol;Acc:HGNC:28107]	63214718	63238501	-	7532	downstream
chr1	ALDBSSCT0000000937	ALDBSSCG0000000578	--	Annotated_lncRNA	223964885	223969102	-	ENSSSCT00000005658	ENSSSCG00000005132	CDKN2B	cyclin dependent kinase inhibitor 2B [Source:HGNC Symbol;Acc:HGNC:1788]	223956057	223958921	+	5963	downstream
chr7	ALDBSSCT0000010184	ALDBSSCG0000006202	--	Annotated_lncRNA	63763302	63772012	-	ENSSSCT00000002134	ENSSSCG00000001905	--	--	63774840	63775439	+	2827	upstream
chr7	ALDBSSCT0000010186	ALDBSSCG0000006204	--	Annotated_lncRNA	65636323	65639788	-	ENSSSCT00000026859	ENSSSCG00000025153	--	--	65648670	65649602	+	8881	upstream
chr7	ALDBSSCT0000010186	ALDBSSCG0000006204	--	Annotated_lncRNA	65636323	65639788	-	ENSSSCT00000002164	ENSSSCG00000001932	HNRNPAB	heterogeneous nuclear ribonucleoprotein A/B [Source:HGNC Symbol;Acc:HGNC:5034]	65641556	65651426	-	1767	downstream
chr1	ALDBSSCT0000000939	ALDBSSCG0000000579	--	Annotated_lncRNA	225086908	225089819	-	ENSSSCT00000031529	ENSSSCG00000027736	IFN-ALPHA-15	-	225090349	225139200	+	529	upstream
chr17	ALDBSSCT0000005312	ALDBSSCG0000003216	--	Annotated_lncRNA	29866786	29870712	-	ENSSSCT00000007761	ENSSSCG00000007089	MGME1	mitochondrial genome maintenance exonuclease 1 [Source:HGNC Symbol;Acc:HGNC:16205]	29871217	29884809	+	504	upstream
chr14	LNC_000844	XLOC_050010	--	Novel_lncRNA	17851234	17859272	-	ENSSSCT00000010639	ENSSSCG00000009704	HMGB2	Sus scrofa high mobility group box 2 (HMGB2), mRNA. [Source:RefSeq mRNA;Acc:NM_214063]	17859679	17862757	+	406	upstream
chr14	LNC_000844	XLOC_050010	--	Novel_lncRNA	17851234	17859272	-	ENSSSCT00000010641	ENSSSCG00000009705	--	--	17867673	17927120	-	8400	downstream
chr14	LNC_000842	XLOC_049973	--	Novel_lncRNA	16891717	16903312	-	ENSSSCT00000010634	ENSSSCG00000009699	--	--	16908630	16921262	+	5317	upstream
chr14	LNC_000843	XLOC_050010	--	Novel_lncRNA	17851234	17859261	-	ENSSSCT00000010639	ENSSSCG00000009704	HMGB2	Sus scrofa high mobility group box 2 (HMGB2), mRNA. [Source:RefSeq mRNA;Acc:NM_214063]	17859679	17862757	+	417	upstream
chr14	LNC_000843	XLOC_050010	--	Novel_lncRNA	17851234	17859261	-	ENSSSCT00000010641	ENSSSCG00000009705	--	--	17867673	17927120	-	8411	downstream
chr14	LNC_000841	XLOC_049951	--	Novel_lncRNA	15310515	15314963	-	ENSSSCT00000010627	ENSSSCG00000009692	PINX1	PIN2/TERF1 interacting, telomerase inhibitor 1 [Source:HGNC Symbol;Acc:HGNC:30046]	15315525	15483059	-	561	downstream
chr9	LNC_001970	XLOC_117419	--	Novel_lncRNA	57489375	57492478	-	ENSSSCT00000016566	ENSSSCG00000015200	--	--	57498520	57507892	-	6041	downstream
chr9	LNC_001970	XLOC_117419	--	Novel_lncRNA	57489375	57492478	-	ENSSSCT00000016565	ENSSSCG00000015199	--	--	57492954	57497554	-	475	downstream
chr14	LNC_000848	XLOC_050187	--	Novel_lncRNA	24689727	24696346	-	ENSSSCT00000010677	ENSSSCG00000009738	--	--	24538360	24695400	+	-5674	antisense
chr3	ALDBSSCT0000006855	ALDBSSCG0000004178	--	Annotated_lncRNA	120658643	120662690	+	ENSSSCT00000023785	ENSSSCG00000029413	DNMT3A	DNA methyltransferase 3 alpha [Source:HGNC Symbol;Acc:HGNC:2978]	120640567	120657717	+	925	downstream
chr3	ALDBSSCT0000006856	ALDBSSCG0000004178	--	Annotated_lncRNA	120659769	120663895	+	ENSSSCT00000023785	ENSSSCG00000029413	DNMT3A	DNA methyltransferase 3 alpha [Source:HGNC Symbol;Acc:HGNC:2978]	120640567	120657717	+	2051	downstream
chr3	ALDBSSCT0000006852	ALDBSSCG0000004175	--	Annotated_lncRNA	119943334	119949945	+	ENSSSCT00000009381	ENSSSCG00000008574	KIF3C	kinesin family member 3C [Source:HGNC Symbol;Acc:HGNC:6321]	119956164	120015781	+	6218	upstream
chrX	ALDBSSCT0000012087	ALDBSSCG0000007371	--	Annotated_lncRNA	130456207	130462937	-	ENSSSCT00000013897	ENSSSCG00000012711	F9	coagulation factor IX [Source:RefSeq peptide;Acc:NP_001157475]	130417597	130447044	+	9162	downstream
chrX	ALDBSSCT0000012087	ALDBSSCG0000007371	--	Annotated_lncRNA	130456207	130462937	-	ENSSSCT00000013898	ENSSSCG00000012712	MCF2	MCF.2 cell line derived transforming sequence [Source:HGNC Symbol;Acc:HGNC:6940]	130466001	130575778	-	3063	downstream
chr8	ALDBSSCT0000010619	ALDBSSCG0000006442	--	Annotated_lncRNA	120497121	120513271	+	ENSSSCT00000035235	ENSSSCG00000009138	CFI	complement factor I [Source:HGNC Symbol;Acc:HGNC:5394]	120517217	120554318	+	3945	upstream
chr8	ALDBSSCT0000010619	ALDBSSCG0000006442	--	Annotated_lncRNA	120497121	120513271	+	ENSSSCT00000022770	ENSSSCG00000020907	--	--	120483790	120496430	-	690	upstream
chr8	ALDBSSCT0000010619	ALDBSSCG0000006442	--	Annotated_lncRNA	120497121	120513271	+	ENSSSCT00000010006	ENSSSCG00000009138	CFI	complement factor I [Source:HGNC Symbol;Acc:HGNC:5394]	120517326	120554337	+	4054	upstream
chr4	ALDBSSCT0000007945	ALDBSSCG0000004816	--	Annotated_lncRNA	46416246	46419945	-	ENSSSCT00000006702	ENSSSCG00000006110	RBM12B	RNA binding motif protein 12B [Source:HGNC Symbol;Acc:HGNC:32310]	46412679	46415639	-	606	upstream
chr4	ALDBSSCT0000007945	ALDBSSCG0000004816	--	Annotated_lncRNA	46416246	46419945	-	ENSSSCT00000006701	ENSSSCG00000006109	FAM92A1	family with sequence similarity 92 member A1 [Source:HGNC Symbol;Acc:HGNC:30452]	46381629	46407866	+	8379	downstream
chr14	ALDBSSCT0000004030	ALDBSSCG0000002429	--	Annotated_lncRNA	111526033	111551014	-	ENSSSCT00000011445	ENSSSCG00000010459	HTR7	5-hydroxytryptamine receptor 7 [Source:HGNC Symbol;Acc:HGNC:5302]	111555789	111660175	-	4774	downstream
chr7	ALDBSSCT0000009737	ALDBSSCG0000005937	--	Annotated_lncRNA	39641840	39694302	+	ENSSSCT00000029770	ENSSSCG00000025423	KCNK5	potassium two pore domain channel subfamily K member 5 [Source:HGNC Symbol;Acc:HGNC:6280]	39704035	39743285	-	9732	downstream
chr14	ALDBSSCT0000004034	ALDBSSCG0000002433	--	Annotated_lncRNA	117177510	117199078	-	ENSSSCT00000011491	ENSSSCG00000010502	CCNJ	cyclin J [Source:HGNC Symbol;Acc:HGNC:23434]	117154842	117176840	+	669	downstream
chr10	ALDBSSCT0000001519	ALDBSSCG0000000923	--	Annotated_lncRNA	46141748	46143030	-	ENSSSCT00000012065	ENSSSCG00000011023	ZNF438	zinc finger protein 438 [Source:HGNC Symbol;Acc:HGNC:21029]	46149334	46153140	-	6303	downstream
chr14	ALDBSSCT0000004038	ALDBSSCG0000002436	--	Annotated_lncRNA	120712244	120713987	-	ENSSSCT00000011537	ENSSSCG00000010546	--	--	120679544	120708029	-	4214	upstream
chr14	ALDBSSCT0000004038	ALDBSSCG0000002436	--	Annotated_lncRNA	120712244	120713987	-	ENSSSCT00000011538	ENSSSCG00000010547	ERLIN1	ER lipid raft associated 1 [Source:HGNC Symbol;Acc:HGNC:16947]	120718816	120753902	-	4828	downstream
chr9	ALDBSSCT0000011581	ALDBSSCG0000007032	--	Annotated_lncRNA	72663396	72666726	-	ENSSSCT00000030608	ENSSSCG00000022398	NUCKS1	nuclear casein kinase and cyclin dependent kinase substrate 1 [Source:HGNC Symbol;Acc:HGNC:29923]	72668703	72701471	-	1976	downstream
chr1	ALDBSSCT0000000021	ALDBSSCG0000000013	--	Annotated_lncRNA	4742967	4743535	+	ENSSSCT00000004453	ENSSSCG00000004027	PDE10A	phosphodiesterase 10A [Source:HGNC Symbol;Acc:HGNC:8772]	4635847	4742048	+	918	downstream
chr5	LNC_001578	XLOC_092389	--	Novel_lncRNA	64328523	64336094	-	ENSSSCT00000000688	ENSSSCG00000000639	--	--	64310466	64320171	+	8351	downstream
chr5	LNC_001575	XLOC_091876	--	Novel_lncRNA	35487331	35504891	-	ENSSSCT00000000521	ENSSSCG00000000483	--	--	35454091	35486530	-	800	upstream
chr5	LNC_001577	XLOC_091979	--	Novel_lncRNA	42870363	42877285	-	ENSSSCT00000000563	ENSSSCG00000000521	PHLDA1	pleckstrin homology like domain family A member 1 [Source:HGNC Symbol;Acc:HGNC:8933]	42877526	42878692	-	240	downstream
chr5	LNC_001576	XLOC_091979	--	Novel_lncRNA	42858926	42877279	-	ENSSSCT00000000563	ENSSSCG00000000521	PHLDA1	pleckstrin homology like domain family A member 1 [Source:HGNC Symbol;Acc:HGNC:8933]	42877526	42878692	-	246	downstream
chr5	LNC_001571	XLOC_091684	--	Novel_lncRNA	23114643	23119155	-	ENSSSCT00000000417	ENSSSCG00000025467	-	Myosin light polypeptide 6 [Source:UniProtKB/Swiss-Prot;Acc:P60662]	23123886	23127111	+	4730	upstream
chr5	LNC_001571	XLOC_091684	--	Novel_lncRNA	23114643	23119155	-	ENSSSCT00000000418	ENSSSCG00000025467	-	Myosin light polypeptide 6 [Source:UniProtKB/Swiss-Prot;Acc:P60662]	23123886	23127111	+	4730	upstream
chr5	LNC_001571	XLOC_091684	--	Novel_lncRNA	23114643	23119155	-	ENSSSCT00000000419	ENSSSCG00000028808	--	--	23121867	23123593	+	2711	upstream
chr5	LNC_001571	XLOC_091684	--	Novel_lncRNA	23114643	23119155	-	ENSSSCT00000032096	ENSSSCG00000022002	--	--	23127539	23149097	-	8383	downstream
chr5	LNC_001571	XLOC_091684	--	Novel_lncRNA	23114643	23119155	-	ENSSSCT00000000403	ENSSSCG00000000377	--	--	23103687	23107038	-	7604	upstream
chr5	LNC_001570	XLOC_091670	--	Novel_lncRNA	22917772	22922920	-	ENSSSCT00000000399	ENSSSCG00000000374	RPS26	40S ribosomal protein S26 [Source:RefSeq peptide;Acc:NP_001090950]	22912634	22914580	-	3191	upstream
chr16	LNC_001017	XLOC_060741	--	Novel_lncRNA	4389780	4395043	-	ENSSSCT00000018270	ENSSSCG00000016783	OTULIN	OTU deubiquitinase with linear linkage specificity [Source:HGNC Symbol;Acc:HGNC:25118]	4402799	4433036	+	7755	upstream
chr9	ALDBSSCT0000011054	ALDBSSCG0000006710	--	Annotated_lncRNA	6145060	6145925	+	ENSSSCT00000016119	ENSSSCG00000014768	TRIM68	tripartite motif containing 68 [Source:HGNC Symbol;Acc:HGNC:21161]	6136129	6143878	+	1181	downstream
chr2	LNC_001140	XLOC_068557	--	Novel_lncRNA	20048876	20061552	+	ENSSSCT00000031374	ENSSSCG00000021739	HSD17B12	hydroxysteroid 17-beta dehydrogenase 12 [Source:HGNC Symbol;Acc:HGNC:18646]	20061566	20211950	-	13	downstream
chr2	LNC_001140	XLOC_068557	--	Novel_lncRNA	20048876	20061552	+	ENSSSCT00000027104	ENSSSCG00000021739	HSD17B12	hydroxysteroid 17-beta dehydrogenase 12 [Source:HGNC Symbol;Acc:HGNC:18646]	20061566	20211950	-	13	downstream
chr2	LNC_001140	XLOC_068557	--	Novel_lncRNA	20048876	20061552	+	ENSSSCT00000029840	ENSSSCG00000025731	ALKBH3	alkB homolog 3, alpha-ketoglutaratedependent dioxygenase [Source:HGNC Symbol;Acc:HGNC:30141]	20010994	20048322	-	553	upstream
chr9	ALDBSSCT0000011355	ALDBSSCG0000006897	--	Annotated_lncRNA	137659239	137671465	+	ENSSSCT00000016954	ENSSSCG00000015564	TSEN15	tRNA splicing endonuclease subunit 15 [Source:HGNC Symbol;Acc:HGNC:16791]	137621561	137657224	+	2014	downstream
chr6	ALDBSSCT0000009391	ALDBSSCG0000005725	--	Annotated_lncRNA	62305181	62318904	-	ENSSSCT00000027328	ENSSSCG00000030253	NOL9	nucleolar protein 9 [Source:HGNC Symbol;Acc:HGNC:26265]	62328372	62349683	-	9467	downstream
chr10	ALDBSSCT0000001336	ALDBSSCG0000000815	--	Annotated_lncRNA	71873347	71882128	+	ENSSSCT00000012210	ENSSSCG00000011153	--	--	71883135	71892873	+	1006	upstream
chr15	ALDBSSCT0000004350	ALDBSSCG0000002636	--	Annotated_lncRNA	146196551	146197936	+	ENSSSCT00000023412	ENSSSCG00000022392	COPS7B	COP9 signalosome subunit 7B [Source:HGNC Symbol;Acc:HGNC:16760]	146199014	146263180	+	1077	upstream
chr15	ALDBSSCT0000004353	ALDBSSCG0000002638	--	Annotated_lncRNA	147200905	147223254	+	ENSSSCT00000017740	ENSSSCG00000016291	--	--	147145312	147196329	-	4575	upstream
chr3	ALDBSSCT0000007106	ALDBSSCG0000004322	--	Annotated_lncRNA	38938179	38940065	-	ENSSSCT00000008705	ENSSSCG00000007943	NMRAL1	NmrA like redox sensor 1 [Source:HGNC Symbol;Acc:HGNC:24987]	38927264	38934243	+	3935	downstream
chr3	ALDBSSCT0000007106	ALDBSSCG0000004322	--	Annotated_lncRNA	38938179	38940065	-	ENSSSCT00000025145	ENSSSCG00000022874	DNAJA3	DnaJ heat shock protein family (Hsp40) member A3 [Source:HGNC Symbol;Acc:HGNC:11808]	38944891	38974098	-	4825	downstream
chr13	LNC_000718	XLOC_042727	--	Novel_lncRNA	6121388	6134381	-	ENSSSCT00000012267	ENSSSCG00000011201	SATB1	SATB homeobox 1 [Source:HGNC Symbol;Acc:HGNC:10541]	6017144	6115611	-	5776	upstream
chr13	LNC_000716	XLOC_042595	--	Novel_lncRNA	217476778	217480322	+	ENSSSCT00000029647	ENSSSCG00000025133	ITGB2	integrin subunit beta 2 [Source:HGNC Symbol;Acc:HGNC:6155]	217446028	217475903	-	874	upstream
chr13	LNC_000717	XLOC_042727	--	Novel_lncRNA	6121388	6132174	-	ENSSSCT00000012267	ENSSSCG00000011201	SATB1	SATB homeobox 1 [Source:HGNC Symbol;Acc:HGNC:10541]	6017144	6115611	-	5776	upstream
chr13	LNC_000715	XLOC_042531	--	Novel_lncRNA	213156873	213163741	+	ENSSSCT00000030548	ENSSSCG00000028122	LCA5L	LCA5L, lebercilin like [Source:HGNC Symbol;Acc:HGNC:1255]	213156288	213183783	-	-6869	antisense
chr13	LNC_000715	XLOC_042531	--	Novel_lncRNA	213156873	213163741	+	ENSSSCT00000031287	ENSSSCG00000028122	LCA5L	LCA5L, lebercilin like [Source:HGNC Symbol;Acc:HGNC:1255]	213156288	213183783	-	-6869	antisense
chr13	LNC_000713	XLOC_042408	--	Novel_lncRNA	205690845	205698973	+	ENSSSCT00000030551	ENSSSCG00000021023	SCAF4	SR-related CTD associated factor 4 [Source:HGNC Symbol;Acc:HGNC:19304]	205632459	205690752	-	92	upstream
chr13	LNC_000710	XLOC_042327	--	Novel_lncRNA	199568996	199770788	+	ENSSSCT00000013154	ENSSSCG00000012022	APP	amyloid beta precursor protein [Source:HGNC Symbol;Acc:HGNC:620]	199291020	199568630	-	365	upstream
chr13	LNC_000710	XLOC_042327	--	Novel_lncRNA	199568996	199770788	+	ENSSSCT00000013153	ENSSSCG00000012022	APP	amyloid beta precursor protein [Source:HGNC Symbol;Acc:HGNC:620]	199291020	199568630	-	365	upstream
chr13	LNC_000711	XLOC_042381	--	Novel_lncRNA	203110474	203127534	+	ENSSSCT00000013161	ENSSSCG00000012029	BACH1	BTB domain and CNC homolog 1 [Source:HGNC Symbol;Acc:HGNC:935]	203134183	203148106	+	6648	upstream
chr14	ALDBSSCT0000003640	ALDBSSCG0000002179	--	Annotated_lncRNA	72365229	72404386	+	ENSSSCT00000011195	ENSSSCG00000010229	REEP3	receptor accessory protein 3 [Source:HGNC Symbol;Acc:HGNC:23711]	72331769	72356665	+	8563	downstream
chr14	ALDBSSCT0000003640	ALDBSSCG0000002179	--	Annotated_lncRNA	72365229	72404386	+	ENSSSCT00000024037	ENSSSCG00000010229	REEP3	receptor accessory protein 3 [Source:HGNC Symbol;Acc:HGNC:23711]	72331769	72357184	+	8044	downstream
chr4	LNC_001483	XLOC_087272	--	Novel_lncRNA	126538915	126541815	-	ENSSSCT00000007508	ENSSSCG00000022983	--	--	126526446	126534670	-	4244	upstream
chr9	ALDBSSCT0000011365	ALDBSSCG0000006904	--	Annotated_lncRNA	142137537	142144029	+	ENSSSCT00000016975	ENSSSCG00000015582	--	--	142083587	142135830	+	1706	downstream
chr4	ALDBSSCT0000008066	ALDBSSCG0000004892	--	Annotated_lncRNA	102627639	102632551	-	ENSSSCT00000007114	ENSSSCG00000006495	--	--	102610616	102625450	-	2188	upstream
chr4	ALDBSSCT0000008066	ALDBSSCG0000004892	--	Annotated_lncRNA	102627639	102632551	-	ENSSSCT00000007115	ENSSSCG00000006496	LMNA	lamin A/C [Source:HGNC Symbol;Acc:HGNC:6636]	102642366	102661829	-	9814	downstream
chr7	ALDBSSCT0000009643	ALDBSSCG0000005884	--	Annotated_lncRNA	9955764	9957965	+	ENSSSCT00000001146	ENSSSCG00000001052	PHACTR1	phosphatase and actin regulator 1 [Source:HGNC Symbol;Acc:HGNC:20990]	9509245	9954959	+	804	downstream
chr3	ALDBSSCT0000006678	ALDBSSCG0000004079	--	Annotated_lncRNA	41640834	41646919	+	ENSSSCT00000028167	ENSSSCG00000021467	EME2	essential meiotic structure-specific endonuclease subunit 2 [Source:HGNC Symbol;Acc:HGNC:27289]	41654997	41657904	-	8077	downstream
chr3	ALDBSSCT0000006678	ALDBSSCG0000004079	--	Annotated_lncRNA	41640834	41646919	+	ENSSSCT00000008780	ENSSSCG00000008012	HAGH	-	41648938	41649925	-	2018	downstream
chr3	ALDBSSCT0000006678	ALDBSSCG0000004079	--	Annotated_lncRNA	41640834	41646919	+	ENSSSCT00000008781	ENSSSCG00000008013	IGFALS	insulin like growth factor binding protein acid labile subunit [Source:HGNC Symbol;Acc:HGNC:5468]	41634233	41637223	-	3610	upstream
chr3	ALDBSSCT0000006678	ALDBSSCG0000004079	--	Annotated_lncRNA	41640834	41646919	+	ENSSSCT00000008782	ENSSSCG00000008014	NUBP2	nucleotide binding protein 2 [Source:HGNC Symbol;Acc:HGNC:8042]	41631025	41633605	+	7228	downstream
chr5	ALDBSSCT0000008263	ALDBSSCG0000005013	--	Annotated_lncRNA	13220029	13223917	+	ENSSSCT00000000174	ENSSSCG00000000165	MTERF2	mitochondrial transcription termination factor 2 [Source:HGNC Symbol;Acc:HGNC:30779]	13226840	13227997	+	2922	upstream
chr5	ALDBSSCT0000008263	ALDBSSCG0000005013	--	Annotated_lncRNA	13220029	13223917	+	ENSSSCT00000000173	ENSSSCG00000000164	CRY1	cryptochrome circadian clock 1 [Source:HGNC Symbol;Acc:HGNC:2384]	13127782	13215788	+	4240	downstream
chr5	ALDBSSCT0000008264	ALDBSSCG0000005014	--	Annotated_lncRNA	13255669	13258956	+	ENSSSCT00000000175	ENSSSCG00000000166	TMEM263	transmembrane protein 263 [Source:HGNC Symbol;Acc:HGNC:28281]	13234050	13250894	-	4774	upstream
chr2	ALDBSSCT0000006510	ALDBSSCG0000003978	--	Annotated_lncRNA	157383171	157384842	-	ENSSSCT00000015780	ENSSSCG00000014435	CSNK1A1	casein kinase 1 alpha 1 [Source:HGNC Symbol;Acc:HGNC:2451]	157388251	157428464	-	3408	downstream
chr13	ALDBSSCT0000003220	ALDBSSCG0000001936	--	Annotated_lncRNA	86560421	86562722	-	ENSSSCT00000024254	ENSSSCG00000027467	DZIP1L	DAZ interacting zinc finger protein 1 like [Source:HGNC Symbol;Acc:HGNC:26551]	86563372	86599606	-	649	downstream
chr13	ALDBSSCT0000003220	ALDBSSCG0000001936	--	Annotated_lncRNA	86560421	86562722	-	ENSSSCT00000027665	ENSSSCG00000027467	DZIP1L	DAZ interacting zinc finger protein 1 like [Source:HGNC Symbol;Acc:HGNC:26551]	86563372	86599606	-	649	downstream
chr2	ALDBSSCT0000006517	ALDBSSCG0000003981	--	Annotated_lncRNA	158335769	158339045	-	ENSSSCT00000015794	ENSSSCG00000014447	SLC6A7	solute carrier family 6 member 7 [Source:HGNC Symbol;Acc:HGNC:11054]	158310614	158328356	+	7412	downstream
chr12	LNC_000620	XLOC_037244	--	Novel_lncRNA	34078584	34080928	-	ENSSSCT00000019177	ENSSSCG00000017615	DGKE	diacylglycerol kinase epsilon [Source:HGNC Symbol;Acc:HGNC:2852]	34090057	34117201	+	9128	upstream
chr12	LNC_000620	XLOC_037244	--	Novel_lncRNA	34078584	34080928	-	ENSSSCT00000019176	ENSSSCG00000017614	TRIM25	-	34081009	34087929	+	80	upstream
chr12	LNC_000620	XLOC_037244	--	Novel_lncRNA	34078584	34080928	-	ENSSSCT00000035478	ENSSSCG00000017614	TRIM25	-	34080929	34087674	+	0	upstream
chr12	LNC_000626	XLOC_037676	--	Novel_lncRNA	50955257	50961088	-	ENSSSCT00000019419	ENSSSCG00000017843	--	--	50954397	50955059	-	197	upstream
chr12	LNC_000624	XLOC_037531	--	Novel_lncRNA	44659771	44662599	-	ENSSSCT00000019308	ENSSSCG00000017741	TEFM	transcription elongation factor, mitochondrial [Source:HGNC Symbol;Acc:HGNC:26223]	44663316	44670761	+	716	upstream
chr12	LNC_000624	XLOC_037531	--	Novel_lncRNA	44659771	44662599	-	ENSSSCT00000019305	ENSSSCG00000017738	ADAP2	ArfGAP with dual PH domains 2 [Source:HGNC Symbol;Acc:HGNC:16487]	44622105	44653020	-	6750	upstream
chr12	LNC_000628	XLOC_037978	--	Novel_lncRNA	58129743	58160951	-	ENSSSCT00000019601	ENSSSCG00000018007	MYH3	myosin heavy chain 3 [Source:HGNC Symbol;Acc:HGNC:7573]	58110959	58132945	+	-3203	antisense
chr13	ALDBSSCT0000002605	ALDBSSCG0000001584	--	Annotated_lncRNA	28517576	28518856	+	ENSSSCT00000012347	ENSSSCG00000011278	TRAK1	trafficking kinesin protein 1 [Source:HGNC Symbol;Acc:HGNC:29947]	28523492	28605085	+	4635	upstream
chr7	LNC_001715	XLOC_101896	--	Novel_lncRNA	50193174	50199172	+	ENSSSCT00000029500	ENSSSCG00000024347	--	--	50169197	50196740	-	-3567	antisense
chr6	ALDBSSCT0000009120	ALDBSSCG0000005562	--	Annotated_lncRNA	140676941	140780591	+	ENSSSCT00000004237	ENSSSCG00000003828	--	--	140421878	140676185	-	755	upstream
chr7	LNC_001717	XLOC_102113	--	Novel_lncRNA	63444155	63464005	+	ENSSSCT00000002128	ENSSSCG00000001900	CSK	c-src tyrosine kinase [Source:RefSeq peptide;Acc:NP_001177102]	63425125	63443865	-	289	upstream
chr7	LNC_001717	XLOC_102113	--	Novel_lncRNA	63444155	63464005	+	ENSSSCT00000002129	ENSSSCG00000001901	CYP1A2	cytochrome P450 family 1 subfamily A member 2 [Source:HGNC Symbol;Acc:HGNC:2596]	63467511	63473453	-	3505	downstream
chr2	LNC_001194	XLOC_071133	--	Novel_lncRNA	144729515	144732198	+	ENSSSCT00000025357	ENSSSCG00000023742	--	--	144736355	144736552	-	4156	downstream
chr7	LNC_001711	XLOC_101555	--	Novel_lncRNA	36958721	36996140	+	ENSSSCT00000001739	ENSSSCG00000001560	C6orf222	chromosome 6 open reading frame 222 [Source:HGNC Symbol;Acc:HGNC:33769]	36937623	36949206	-	9514	upstream
chr7	LNC_001711	XLOC_101555	--	Novel_lncRNA	36958721	36996140	+	ENSSSCT00000001740	ENSSSCG00000001561	ETV7	ETS variant 7 [Source:HGNC Symbol;Acc:HGNC:18160]	36990013	37008146	-	-6128	antisense
chr7	LNC_001710	XLOC_101555	--	Novel_lncRNA	36958707	36996140	+	ENSSSCT00000001739	ENSSSCG00000001560	C6orf222	chromosome 6 open reading frame 222 [Source:HGNC Symbol;Acc:HGNC:33769]	36937623	36949206	-	9500	upstream
chr7	LNC_001710	XLOC_101555	--	Novel_lncRNA	36958707	36996140	+	ENSSSCT00000001740	ENSSSCG00000001561	ETV7	ETS variant 7 [Source:HGNC Symbol;Acc:HGNC:18160]	36990013	37008146	-	-6128	antisense
chr7	LNC_001713	XLOC_101563	--	Novel_lncRNA	37006043	37018281	+	ENSSSCT00000001740	ENSSSCG00000001561	ETV7	ETS variant 7 [Source:HGNC Symbol;Acc:HGNC:18160]	36990013	37008146	-	-2104	antisense
chr7	LNC_001712	XLOC_101555	--	Novel_lncRNA	36958779	36996140	+	ENSSSCT00000001739	ENSSSCG00000001560	C6orf222	chromosome 6 open reading frame 222 [Source:HGNC Symbol;Acc:HGNC:33769]	36937623	36949206	-	9572	upstream
chr7	LNC_001712	XLOC_101555	--	Novel_lncRNA	36958779	36996140	+	ENSSSCT00000001740	ENSSSCG00000001561	ETV7	ETS variant 7 [Source:HGNC Symbol;Acc:HGNC:18160]	36990013	37008146	-	-6128	antisense
chr7	LNC_001719	XLOC_102113	--	Novel_lncRNA	63445022	63467650	+	ENSSSCT00000002128	ENSSSCG00000001900	CSK	c-src tyrosine kinase [Source:RefSeq peptide;Acc:NP_001177102]	63425125	63443865	-	1156	upstream
chr7	LNC_001719	XLOC_102113	--	Novel_lncRNA	63445022	63467650	+	ENSSSCT00000002129	ENSSSCG00000001901	CYP1A2	cytochrome P450 family 1 subfamily A member 2 [Source:HGNC Symbol;Acc:HGNC:2596]	63467511	63473453	-	-140	antisense
chr7	LNC_001718	XLOC_102113	--	Novel_lncRNA	63444987	63467650	+	ENSSSCT00000002128	ENSSSCG00000001900	CSK	c-src tyrosine kinase [Source:RefSeq peptide;Acc:NP_001177102]	63425125	63443865	-	1121	upstream
chr7	LNC_001718	XLOC_102113	--	Novel_lncRNA	63444987	63467650	+	ENSSSCT00000002129	ENSSSCG00000001901	CYP1A2	cytochrome P450 family 1 subfamily A member 2 [Source:HGNC Symbol;Acc:HGNC:2596]	63467511	63473453	-	-140	antisense
chrX	ALDBSSCT0000011965	ALDBSSCG0000007282	--	Annotated_lncRNA	113105761	113109306	+	ENSSSCT00000035805	ENSSSCG00000012608	ZBTB33	zinc finger and BTB domain containing 33 [Source:HGNC Symbol;Acc:HGNC:16682]	113089380	113097850	-	7910	upstream
chrX	ALDBSSCT0000011962	ALDBSSCG0000007280	--	Annotated_lncRNA	104774822	104778425	+	ENSSSCT00000034839	ENSSSCG00000031027	--	--	104771352	104773533	-	1288	upstream
chr12	ALDBSSCT0000002510	ALDBSSCG0000001518	--	Annotated_lncRNA	57507470	57509678	-	ENSSSCT00000019590	ENSSSCG00000018001	GAS7	growth arrest specific 7 [Source:HGNC Symbol;Acc:HGNC:4169]	57516159	57541657	-	6480	downstream
chr12	ALDBSSCT0000002510	ALDBSSCG0000001518	--	Annotated_lncRNA	57507470	57509678	-	ENSSSCT00000023911	ENSSSCG00000028770	RCVRN	recoverin [Source:HGNC Symbol;Acc:HGNC:9937]	57499216	57506521	-	948	upstream
chr6	ALDBSSCT0000008849	ALDBSSCG0000005406	--	Annotated_lncRNA	48452344	48455032	+	ENSSSCT00000026006	ENSSSCG00000024240	CCDC9	coiled-coil domain containing 9 [Source:HGNC Symbol;Acc:HGNC:24560]	48439235	48450630	+	1713	downstream
chr11	LNC_000535	XLOC_032736	--	Novel_lncRNA	183290	193078	-	ENSSSCT00000030327	ENSSSCG00000025308	IL17D	interleukin 17D [Source:HGNC Symbol;Acc:HGNC:5984]	150179	193919	+	-9789	antisense
chr11	LNC_000535	XLOC_032736	--	Novel_lncRNA	183290	193078	-	ENSSSCT00000035652	ENSSSCG00000025308	IL17D	interleukin 17D [Source:HGNC Symbol;Acc:HGNC:5984]	190626	191973	+	-1348	antisense
chr11	LNC_000535	XLOC_032736	--	Novel_lncRNA	183290	193078	-	ENSSSCT00000024896	ENSSSCG00000025308	IL17D	interleukin 17D [Source:HGNC Symbol;Acc:HGNC:5984]	150055	193919	+	-9789	antisense
chr16	LNC_001001	XLOC_060077	--	Novel_lncRNA	54996948	55013992	+	ENSSSCT00000018492	ENSSSCG00000016982	--	--	54988239	54996836	-	111	upstream
chr16	LNC_001000	XLOC_060077	--	Novel_lncRNA	54996898	55013137	+	ENSSSCT00000018492	ENSSSCG00000016982	--	--	54988239	54996836	-	61	upstream
chr3	ALDBSSCT0000007116	ALDBSSCG0000004331	--	Annotated_lncRNA	42334120	42343951	-	ENSSSCT00000008814	ENSSSCG00000008043	--	--	42353097	42371672	+	9145	upstream
chr3	ALDBSSCT0000007116	ALDBSSCG0000004331	--	Annotated_lncRNA	42334120	42343951	-	ENSSSCT00000024607	ENSSSCG00000023552	--	--	42345460	42348920	+	1508	upstream
chr3	ALDBSSCT0000007116	ALDBSSCG0000004331	--	Annotated_lncRNA	42334120	42343951	-	ENSSSCT00000008812	ENSSSCG00000008041	PKD1	polycystin 1, transient receptor potential channel interacting [Source:HGNC Symbol;Acc:HGNC:9008]	42282099	42331947	-	2172	upstream
chr3	ALDBSSCT0000007114	ALDBSSCG0000004330	--	Annotated_lncRNA	40884942	40888371	-	ENSSSCT00000008731	ENSSSCG00000007968	RHBDF1	-	40869648	40876103	-	8838	upstream
chr3	ALDBSSCT0000007114	ALDBSSCG0000004330	--	Annotated_lncRNA	40884942	40888371	-	ENSSSCT00000008745	ENSSSCG00000007982	MPG	N-methylpurine DNA glycosylase [Source:HGNC Symbol;Acc:HGNC:7211]	40892304	40898426	+	3932	upstream
chr3	ALDBSSCT0000007114	ALDBSSCG0000004330	--	Annotated_lncRNA	40884942	40888371	-	ENSSSCT00000008744	ENSSSCG00000007981	NPRL3	NPR3 like, GATOR1 complex subunit [Source:HGNC Symbol;Acc:HGNC:14124]	40898075	40931888	-	9703	downstream
GL893620.1	ALDBSSCT0000011814	ALDBSSCG0000007171	--	Annotated_lncRNA	40044	41980	+	ENSSSCT00000004401	ENSSSCG00000003979	ZNF684	zinc finger protein 684 [Source:HGNC Symbol;Acc:HGNC:28418]	46671	51609	+	4690	upstream
GL893620.1	ALDBSSCT0000011814	ALDBSSCG0000007171	--	Annotated_lncRNA	40044	41980	+	ENSSSCT00000027325	ENSSSCG00000003979	ZNF684	zinc finger protein 684 [Source:HGNC Symbol;Acc:HGNC:28418]	46692	51603	+	4711	upstream
GL893689.1	ALDBSSCT0000011818	ALDBSSCG0000007174	--	Annotated_lncRNA	63126	81187	+	ENSSSCT00000032078	ENSSSCG00000022145	RPF1	ribosome production factor 1 homolog [Source:HGNC Symbol;Acc:HGNC:30350]	45030	60086	-	3039	upstream
chr3	ALDBSSCT0000007119	ALDBSSCG0000004331	--	Annotated_lncRNA	42334120	42343960	-	ENSSSCT00000008814	ENSSSCG00000008043	--	--	42353097	42371672	+	9136	upstream
chr3	ALDBSSCT0000007119	ALDBSSCG0000004331	--	Annotated_lncRNA	42334120	42343960	-	ENSSSCT00000024607	ENSSSCG00000023552	--	--	42345460	42348920	+	1499	upstream
chr3	ALDBSSCT0000007119	ALDBSSCG0000004331	--	Annotated_lncRNA	42334120	42343960	-	ENSSSCT00000008812	ENSSSCG00000008041	PKD1	polycystin 1, transient receptor potential channel interacting [Source:HGNC Symbol;Acc:HGNC:9008]	42282099	42331947	-	2172	upstream
chr3	ALDBSSCT0000007118	ALDBSSCG0000004331	--	Annotated_lncRNA	42334120	42343960	-	ENSSSCT00000008814	ENSSSCG00000008043	--	--	42353097	42371672	+	9136	upstream
chr3	ALDBSSCT0000007118	ALDBSSCG0000004331	--	Annotated_lncRNA	42334120	42343960	-	ENSSSCT00000024607	ENSSSCG00000023552	--	--	42345460	42348920	+	1499	upstream
chr3	ALDBSSCT0000007118	ALDBSSCG0000004331	--	Annotated_lncRNA	42334120	42343960	-	ENSSSCT00000008812	ENSSSCG00000008041	PKD1	polycystin 1, transient receptor potential channel interacting [Source:HGNC Symbol;Acc:HGNC:9008]	42282099	42331947	-	2172	upstream
chr18	ALDBSSCT0000005639	ALDBSSCG0000003418	--	Annotated_lncRNA	8696569	8697092	-	ENSSSCT00000017956	ENSSSCG00000016492	AGK	acylglycerol kinase [Source:HGNC Symbol;Acc:HGNC:21869]	8555431	8689368	-	7200	upstream
chr17	ALDBSSCT0000005151	ALDBSSCG0000003106	--	Annotated_lncRNA	36275202	36282755	+	ENSSSCT00000007820	ENSSSCG00000007147	--	--	36285534	36305348	-	2778	downstream
chr17	ALDBSSCT0000005151	ALDBSSCG0000003106	--	Annotated_lncRNA	36275202	36282755	+	ENSSSCT00000007821	ENSSSCG00000007148	--	--	36283270	36283745	+	514	upstream
chr17	ALDBSSCT0000005151	ALDBSSCG0000003106	--	Annotated_lncRNA	36275202	36282755	+	ENSSSCT00000007822	ENSSSCG00000007149	SPEF1	sperm flagellar 1 [Source:HGNC Symbol;Acc:HGNC:15874]	36267030	36270635	+	4566	downstream
chr17	ALDBSSCT0000005376	ALDBSSCG0000003252	--	Annotated_lncRNA	54412732	54419444	-	ENSSSCT00000008149	ENSSSCG00000007445	ZNF334	zinc finger protein 334 [Source:HGNC Symbol;Acc:HGNC:15806]	54403919	54405741	-	6990	upstream
chr17	ALDBSSCT0000005376	ALDBSSCG0000003252	--	Annotated_lncRNA	54412732	54419444	-	ENSSSCT00000008151	ENSSSCG00000029293	--	--	54424384	54428317	-	4939	downstream
chr17	ALDBSSCT0000005174	ALDBSSCG0000003124	--	Annotated_lncRNA	47119459	47122536	+	ENSSSCT00000008039	ENSSSCG00000007347	--	--	47091150	47111188	-	8270	upstream
chr2	LNC_001144	XLOC_068782	--	Novel_lncRNA	44888778	44894567	+	ENSSSCT00000014614	ENSSSCG00000013380	NUCB2	nucleobindin 2 [Source:HGNC Symbol;Acc:HGNC:8044]	44840131	44888595	-	182	upstream
chr2	LNC_001145	XLOC_068852	--	Novel_lncRNA	48091824	48100024	+	ENSSSCT00000014630	ENSSSCG00000013393	--	--	48089156	48609204	-	-8201	antisense
chr2	LNC_001146	XLOC_068852	--	Novel_lncRNA	48091825	48100024	+	ENSSSCT00000014630	ENSSSCG00000013393	--	--	48089156	48609204	-	-8200	antisense
chr2	ALDBSSCT0000005771	ALDBSSCG0000003506	--	Annotated_lncRNA	1480231	1482657	+	ENSSSCT00000028464	ENSSSCG00000022579	--	--	1469314	1477594	+	2636	downstream
chr2	ALDBSSCT0000005771	ALDBSSCG0000003506	--	Annotated_lncRNA	1480231	1482657	+	ENSSSCT00000027596	ENSSSCG00000022123	--	--	1487597	1488346	+	4939	upstream
chr2	LNC_001143	XLOC_068603	--	Novel_lncRNA	27855546	27867601	+	ENSSSCT00000029479	ENSSSCG00000028338	PAMR1	peptidase domain containing associated with muscle regeneration 1 [Source:HGNC Symbol;Acc:HGNC:24554]	27877535	27954885	+	9933	upstream
chr10	LNC_000440	XLOC_027351	--	Novel_lncRNA	3306542	3309489	+	ENSSSCT00000011824	ENSSSCG00000010808	RGS18	regulator of G-protein signaling 18 [Source:HGNC Symbol;Acc:HGNC:14261]	3286932	3305931	-	610	upstream
chr10	LNC_000447	XLOC_027434	--	Novel_lncRNA	11748843	11753824	+	ENSSSCT00000011840	ENSSSCG00000010822	BPNT1	3'(2'), 5'-bisphosphate nucleotidase 1 [Source:HGNC Symbol;Acc:HGNC:1096]	11741455	11765922	-	-4982	antisense
chr14	ALDBSSCT0000003918	ALDBSSCG0000002356	--	Annotated_lncRNA	54569576	54587681	-	ENSSSCT00000011079	ENSSSCG00000010118	HIRA	histone cell cycle regulator [Source:HGNC Symbol;Acc:HGNC:4916]	54596104	54652180	-	8422	downstream
chr3	LNC_001378	XLOC_081685	--	Novel_lncRNA	137619654	137623080	-	ENSSSCT00000009459	ENSSSCG00000008646	RNF144A	ring finger protein 144A [Source:HGNC Symbol;Acc:HGNC:20457]	137582368	137612589	-	7064	upstream
chr14	ALDBSSCT0000003917	ALDBSSCG0000002355	--	Annotated_lncRNA	54510427	54511319	-	ENSSSCT00000011075	ENSSSCG00000010114	DGCR14	DiGeorge syndrome critical region gene 14 [Source:HGNC Symbol;Acc:HGNC:16817]	54512217	54522916	-	897	downstream
chr14	ALDBSSCT0000003915	ALDBSSCG0000002354	--	Annotated_lncRNA	52322075	52323011	-	ENSSSCT00000011003	ENSSSCG00000010042	ZNF280B	zinc finger protein 280B [Source:HGNC Symbol;Acc:HGNC:23022]	52311349	52313144	-	8930	upstream
chr14	ALDBSSCT0000003914	ALDBSSCG0000002353	--	Annotated_lncRNA	51015689	51017214	-	ENSSSCT00000010974	ENSSSCG00000010017	SMTN	smoothelin [Source:HGNC Symbol;Acc:HGNC:11126]	50990976	51014415	+	1273	downstream
chr14	ALDBSSCT0000003914	ALDBSSCG0000002353	--	Annotated_lncRNA	51015689	51017214	-	ENSSSCT00000024173	ENSSSCG00000030345	INPP5J	inositol polyphosphate-5-phosphatase J [Source:HGNC Symbol;Acc:HGNC:8956]	51025169	51034345	+	7954	upstream
chr14	ALDBSSCT0000003914	ALDBSSCG0000002353	--	Annotated_lncRNA	51015689	51017214	-	ENSSSCT00000029493	ENSSSCG00000029781	--	--	51014465	51015046	-	642	upstream
chr3	ALDBSSCT0000007063	ALDBSSCG0000004294	--	Annotated_lncRNA	24272678	24280784	-	ENSSSCT00000008589	ENSSSCG00000007839	EEF2K	eukaryotic elongation factor 2 kinase [Source:HGNC Symbol;Acc:HGNC:24615]	24287300	24412658	-	6515	downstream
chr6	LNC_001638	XLOC_096720	--	Novel_lncRNA	152559474	152562289	+	ENSSSCT00000004317	ENSSSCG00000003902	NSUN4	NOP2/Sun RNA methyltransferase family member 4 [Source:HGNC Symbol;Acc:HGNC:31802]	152571133	152598273	-	8843	downstream
chr6	LNC_001638	XLOC_096720	--	Novel_lncRNA	152559474	152562289	+	ENSSSCT00000004316	ENSSSCG00000003901	FAAH	fatty acid amide hydrolase [Source:HGNC Symbol;Acc:HGNC:3553]	152539022	152558096	-	1377	upstream
chr11	ALDBSSCT0000001850	ALDBSSCG0000001115	--	Annotated_lncRNA	203640	220289	-	ENSSSCT00000030327	ENSSSCG00000025308	IL17D	interleukin 17D [Source:HGNC Symbol;Acc:HGNC:5984]	150179	193919	+	9720	downstream
chr11	ALDBSSCT0000001850	ALDBSSCG0000001115	--	Annotated_lncRNA	203640	220289	-	ENSSSCT00000010159	ENSSSCG00000009276	XPO4	exportin 4 [Source:HGNC Symbol;Acc:HGNC:17796]	230115	288910	-	9825	downstream
chr11	ALDBSSCT0000001850	ALDBSSCG0000001115	--	Annotated_lncRNA	203640	220289	-	ENSSSCT00000024896	ENSSSCG00000025308	IL17D	interleukin 17D [Source:HGNC Symbol;Acc:HGNC:5984]	150055	193919	+	9720	downstream
GL894864.1	LNC_000142	XLOC_008373	--	Novel_lncRNA	37294	38886	+	ENSSSCT00000017871	ENSSSCG00000026147	--	--	45254	55906	+	6367	upstream
chr11	ALDBSSCT0000001671	ALDBSSCG0000001009	--	Annotated_lncRNA	5702271	5703161	+	ENSSSCT00000010214	ENSSSCG00000009322	SLC46A3	solute carrier family 46 member 3 [Source:HGNC Symbol;Acc:HGNC:27501]	5678755	5692527	+	9743	downstream
chr11	ALDBSSCT0000001858	ALDBSSCG0000001121	--	Annotated_lncRNA	2259071	2266658	-	ENSSSCT00000010181	ENSSSCG00000009293	--	--	2163384	2256282	-	2788	upstream
GL895036.1	LNC_000149	XLOC_008832	--	Novel_lncRNA	345	5007	-	ENSSSCT00000024544	ENSSSCG00000020754	CD3EAP	CD3e molecule associated protein [Source:HGNC Symbol;Acc:HGNC:24219]	5338	7983	+	330	upstream
GL895030.2	LNC_000148	XLOC_008790	--	Novel_lncRNA	39034	40463	+	ENSSSCT00000030187	ENSSSCG00000028057	--	--	42033	46634	-	1569	downstream
chr2	ALDBSSCT0000006249	ALDBSSCG0000003815	--	Annotated_lncRNA	30980287	30986006	-	ENSSSCT00000030193	ENSSSCG00000024950	--	--	30987742	31245698	+	1735	upstream
chr6	LNC_001639	XLOC_096720	--	Novel_lncRNA	152560455	152562289	+	ENSSSCT00000004317	ENSSSCG00000003902	NSUN4	NOP2/Sun RNA methyltransferase family member 4 [Source:HGNC Symbol;Acc:HGNC:31802]	152571133	152598273	-	8843	downstream
chr6	LNC_001639	XLOC_096720	--	Novel_lncRNA	152560455	152562289	+	ENSSSCT00000004316	ENSSSCG00000003901	FAAH	fatty acid amide hydrolase [Source:HGNC Symbol;Acc:HGNC:3553]	152539022	152558096	-	2358	upstream
chr17	ALDBSSCT0000005203	ALDBSSCG0000003140	--	Annotated_lncRNA	54621851	54622450	+	ENSSSCT00000008156	ENSSSCG00000007452	TP53RK	TP53 regulating kinase [Source:HGNC Symbol;Acc:HGNC:16197]	54610072	54612776	+	9074	downstream
chr9	LNC_001923	XLOC_115508	--	Novel_lncRNA	136400791	136405869	+	ENSSSCT00000034683	ENSSSCG00000015552	DHX9	-	136406808	136410773	-	938	downstream
chr9	LNC_001923	XLOC_115508	--	Novel_lncRNA	136400791	136405869	+	ENSSSCT00000016943	ENSSSCG00000015553	--	--	136414365	136422639	-	8495	downstream
chr9	LNC_001923	XLOC_115508	--	Novel_lncRNA	136400791	136405869	+	ENSSSCT00000016942	ENSSSCG00000015552	DHX9	-	136406642	136413846	-	772	downstream
chr9	LNC_001920	XLOC_115175	--	Novel_lncRNA	120219439	120223001	+	ENSSSCT00000016835	ENSSSCG00000015453	PDIA4	protein disulfide isomerase family A member 4 [Source:HGNC Symbol;Acc:HGNC:30167]	120198069	120217680	+	1758	downstream
GL892813.1	LNC_000033	XLOC_001691	--	Novel_lncRNA	34225	37498	+	ENSSSCT00000028747	ENSSSCG00000027015	FAM57B	family with sequence similarity 57 member B [Source:HGNC Symbol;Acc:HGNC:25295]	29783	36771	-	-2547	antisense
GL892813.1	LNC_000032	XLOC_001691	--	Novel_lncRNA	34217	38927	+	ENSSSCT00000028747	ENSSSCG00000027015	FAM57B	family with sequence similarity 57 member B [Source:HGNC Symbol;Acc:HGNC:25295]	29783	36771	-	-2555	antisense
GL892813.1	LNC_000031	XLOC_001691	--	Novel_lncRNA	30348	38927	+	ENSSSCT00000028747	ENSSSCG00000027015	FAM57B	family with sequence similarity 57 member B [Source:HGNC Symbol;Acc:HGNC:25295]	29783	36771	-	-6424	antisense
GL892813.1	LNC_000030	XLOC_001691	--	Novel_lncRNA	30327	38927	+	ENSSSCT00000028747	ENSSSCG00000027015	FAM57B	family with sequence similarity 57 member B [Source:HGNC Symbol;Acc:HGNC:25295]	29783	36771	-	-6445	antisense
GL892871.2	LNC_000034	XLOC_001794	--	Novel_lncRNA	20717	21700	+	ENSSSCT00000032339	ENSSSCG00000029329	--	--	16733	20522	+	194	downstream
GL892871.2	LNC_000034	XLOC_001794	--	Novel_lncRNA	20717	21700	+	ENSSSCT00000028174	ENSSSCG00000030416	--	--	27461	33855	+	5760	upstream
chr8	LNC_001810	XLOC_107302	--	Novel_lncRNA	69894864	69906136	+	ENSSSCT00000009772	ENSSSCG00000008924	UBA6	ubiquitin like modifier activating enzyme 6 [Source:HGNC Symbol;Acc:HGNC:25581]	69807548	69894666	-	197	upstream
chr8	LNC_001810	XLOC_107302	--	Novel_lncRNA	69894864	69906136	+	ENSSSCT00000009773	ENSSSCG00000008925	GNRHR	gonadotropin releasing hormone receptor [Source:HGNC Symbol;Acc:HGNC:4421]	69901152	69911347	-	-4985	antisense
chr8	LNC_001811	XLOC_107776	--	Novel_lncRNA	89798346	89802246	+	ENSSSCT00000024632	ENSSSCG00000009049	USP38	ubiquitin specific peptidase 38 [Source:HGNC Symbol;Acc:HGNC:20067]	89717750	89798021	-	324	upstream
chr8	LNC_001811	XLOC_107776	--	Novel_lncRNA	89798346	89802246	+	ENSSSCT00000009910	ENSSSCG00000009049	USP38	ubiquitin specific peptidase 38 [Source:HGNC Symbol;Acc:HGNC:20067]	89717750	89798021	-	324	upstream
chr8	LNC_001811	XLOC_107776	--	Novel_lncRNA	89798346	89802246	+	ENSSSCT00000027160	ENSSSCG00000009049	USP38	ubiquitin specific peptidase 38 [Source:HGNC Symbol;Acc:HGNC:20067]	89717750	89798021	-	324	upstream
chr18	ALDBSSCT0000005588	ALDBSSCG0000003380	--	Annotated_lncRNA	56115355	56192888	+	ENSSSCT00000018239	ENSSSCG00000016757	--	--	56195631	56205539	+	2742	upstream
chr8	LNC_001818	XLOC_108067	--	Novel_lncRNA	103876586	103893676	+	ENSSSCT00000009943	ENSSSCG00000009077	HSPA4L	heat shock protein family A (Hsp70) member 4 like [Source:HGNC Symbol;Acc:HGNC:17041]	103901031	103951701	-	7354	downstream
chr8	LNC_001818	XLOC_108067	--	Novel_lncRNA	103876586	103893676	+	ENSSSCT00000009942	ENSSSCG00000009076	PLK4	polo like kinase 4 [Source:HGNC Symbol;Acc:HGNC:11397]	103855199	103876539	-	46	upstream
chr10	ALDBSSCT0000001454	ALDBSSCG0000000877	--	Annotated_lncRNA	19937230	19951293	-	ENSSSCT00000011900	ENSSSCG00000010877	HNRNPU	heterogeneous nuclear ribonucleoprotein U [Source:HGNC Symbol;Acc:HGNC:5048]	19918406	19928777	+	8452	downstream
chr10	ALDBSSCT0000001327	ALDBSSCG0000000810	--	Annotated_lncRNA	70856795	70857675	+	ENSSSCT00000012185	ENSSSCG00000011133	PFKFB3	6-phosphofructo-2-kinase/fructose-2,6-biphosphatase 3 [Source:HGNC Symbol;Acc:HGNC:8874]	70831452	70853803	+	2991	downstream
chr10	ALDBSSCT0000001456	ALDBSSCG0000000877	--	Annotated_lncRNA	19937230	19951293	-	ENSSSCT00000011900	ENSSSCG00000010877	HNRNPU	heterogeneous nuclear ribonucleoprotein U [Source:HGNC Symbol;Acc:HGNC:5048]	19918406	19928777	+	8452	downstream
chr5	LNC_001592	XLOC_092894	--	Novel_lncRNA	85618159	85698594	-	ENSSSCT00000023468	ENSSSCG00000000857	IGF1	insulin like growth factor 1 [Source:HGNC Symbol;Acc:HGNC:5464]	85702515	85758799	+	3920	upstream
chr5	LNC_001592	XLOC_092894	--	Novel_lncRNA	85618159	85698594	-	ENSSSCT00000035532	ENSSSCG00000000857	IGF1	insulin like growth factor 1 [Source:HGNC Symbol;Acc:HGNC:5464]	85700101	85774105	+	1506	upstream
chr5	LNC_001592	XLOC_092894	--	Novel_lncRNA	85618159	85698594	-	ENSSSCT00000034198	ENSSSCG00000000857	IGF1	insulin like growth factor 1 [Source:HGNC Symbol;Acc:HGNC:5464]	85702515	85773709	+	3920	upstream
chr5	LNC_001592	XLOC_092894	--	Novel_lncRNA	85618159	85698594	-	ENSSSCT00000035024	ENSSSCG00000000857	IGF1	insulin like growth factor 1 [Source:HGNC Symbol;Acc:HGNC:5464]	85700467	85773736	+	1872	upstream
chr5	LNC_001592	XLOC_092894	--	Novel_lncRNA	85618159	85698594	-	ENSSSCT00000035604	ENSSSCG00000000857	IGF1	insulin like growth factor 1 [Source:HGNC Symbol;Acc:HGNC:5464]	85700423	85773709	+	1828	upstream
chr5	LNC_001592	XLOC_092894	--	Novel_lncRNA	85618159	85698594	-	ENSSSCT00000034323	ENSSSCG00000000857	IGF1	insulin like growth factor 1 [Source:HGNC Symbol;Acc:HGNC:5464]	85701238	85773707	+	2643	upstream
chr5	LNC_001592	XLOC_092894	--	Novel_lncRNA	85618159	85698594	-	ENSSSCT00000034902	ENSSSCG00000000857	IGF1	insulin like growth factor 1 [Source:HGNC Symbol;Acc:HGNC:5464]	85700610	85773618	+	2015	upstream
chr5	LNC_001592	XLOC_092894	--	Novel_lncRNA	85618159	85698594	-	ENSSSCT00000000936	ENSSSCG00000000857	IGF1	insulin like growth factor 1 [Source:HGNC Symbol;Acc:HGNC:5464]	85700479	85773709	+	1884	upstream
chr5	LNC_001592	XLOC_092894	--	Novel_lncRNA	85618159	85698594	-	ENSSSCT00000000935	ENSSSCG00000000857	IGF1	insulin like growth factor 1 [Source:HGNC Symbol;Acc:HGNC:5464]	85700479	85758799	+	1884	upstream
chr5	LNC_001592	XLOC_092894	--	Novel_lncRNA	85618159	85698594	-	ENSSSCT00000034991	ENSSSCG00000000857	IGF1	insulin like growth factor 1 [Source:HGNC Symbol;Acc:HGNC:5464]	85700617	85773707	+	2022	upstream
chr7	ALDBSSCT0000010199	ALDBSSCG0000006209	--	Annotated_lncRNA	73152420	73196982	-	ENSSSCT00000002204	ENSSSCG00000001971	HECTD1	HECT domain E3 ubiquitin protein ligase 1 [Source:HGNC Symbol;Acc:HGNC:20157]	73199745	73302724	+	2762	upstream
chr1	ALDBSSCT0000000584	ALDBSSCG0000000349	--	Annotated_lncRNA	314141524	314143569	+	ENSSSCT00000006435	ENSSSCG00000005856	RNF224	ring finger protein 224 [Source:HGNC Symbol;Acc:HGNC:41912]	314145387	314145860	-	1817	downstream
chr1	ALDBSSCT0000000584	ALDBSSCG0000000349	--	Annotated_lncRNA	314141524	314143569	+	ENSSSCT00000006436	ENSSSCG00000005857	CYSRT1	cysteine rich tail 1 [Source:HGNC Symbol;Acc:HGNC:30529]	314147913	314151525	-	4343	downstream
chr1	ALDBSSCT0000000584	ALDBSSCG0000000349	--	Annotated_lncRNA	314141524	314143569	+	ENSSSCT00000006428	ENSSSCG00000005849	TUBB4B	tubulin beta 4B class IVb [Source:HGNC Symbol;Acc:HGNC:20771]	314135326	314137894	-	3629	upstream
chr1	ALDBSSCT0000000584	ALDBSSCG0000000349	--	Annotated_lncRNA	314141524	314143569	+	ENSSSCT00000006437	ENSSSCG00000005858	RNF208	ring finger protein 208 [Source:HGNC Symbol;Acc:HGNC:25420]	314152677	314153474	+	9107	upstream
chr1	ALDBSSCT0000000584	ALDBSSCG0000000349	--	Annotated_lncRNA	314141524	314143569	+	ENSSSCT00000006427	ENSSSCG00000005848	FAM166A	family with sequence similarity 166 member A [Source:HGNC Symbol;Acc:HGNC:33818]	314131997	314135358	+	6165	downstream
chr4	ALDBSSCT0000008123	ALDBSSCG0000004929	--	Annotated_lncRNA	117786465	117788082	-	ENSSSCT00000007419	ENSSSCG00000006773	FAM19A3	family with sequence similarity 19 member A3, C-C motif chemokine like [Source:HGNC Symbol;Acc:HGNC:21590]	117783000	117785015	-	1449	upstream
chr4	ALDBSSCT0000008123	ALDBSSCG0000004929	--	Annotated_lncRNA	117786465	117788082	-	ENSSSCT00000007420	ENSSSCG00000006774	PPM1J	protein phosphatase, Mg2+/Mn2+ dependent 1J [Source:HGNC Symbol;Acc:HGNC:20785]	117792236	117797886	+	4153	upstream
chr8	ALDBSSCT0000010512	ALDBSSCG0000006378	--	Annotated_lncRNA	75048475	75055632	+	ENSSSCT00000009821	ENSSSCG00000008966	PARM1	prostate androgen-regulated mucin-like protein 1 precursor [Source:RefSeq peptide;Acc:NP_001230645]	75007835	75040223	+	8251	downstream
chr9	ALDBSSCT0000011249	ALDBSSCG0000006831	--	Annotated_lncRNA	74914992	74920416	+	ENSSSCT00000016668	ENSSSCG00000015297	ADAM22	ADAM metallopeptidase domain 22 [Source:HGNC Symbol;Acc:HGNC:201]	74844064	74905640	+	9351	downstream
chr9	ALDBSSCT0000011249	ALDBSSCG0000006831	--	Annotated_lncRNA	74914992	74920416	+	ENSSSCT00000016669	ENSSSCG00000015298	SRI	Sus scrofa sorcin (SRI), transcript variant 2, mRNA. [Source:RefSeq mRNA;Acc:NM_001244143]	74928185	74944051	-	7768	downstream
chr14	LNC_000855	XLOC_050513	--	Novel_lncRNA	43440518	43448386	-	ENSSSCT00000010873	ENSSSCG00000009922	--	--	43449219	43456000	+	832	upstream
chr14	LNC_000855	XLOC_050513	--	Novel_lncRNA	43440518	43448386	-	ENSSSCT00000010872	ENSSSCG00000009921	OASL	2'-5'-oligoadenylate synthetase-like [Source:HGNC Symbol;Acc:HGNC:8090]	43414434	43431814	-	8703	upstream
chr14	LNC_000854	XLOC_050489	--	Novel_lncRNA	42690943	42691779	-	ENSSSCT00000010846	ENSSSCG00000009896	BICDL1	BICD family like cargo adaptor 1 [Source:HGNC Symbol;Acc:HGNC:28095]	42566601	42686064	+	4878	downstream
chr14	LNC_000854	XLOC_050489	--	Novel_lncRNA	42690943	42691779	-	ENSSSCT00000010847	ENSSSCG00000009897	RAB35	RAB35, member RAS oncogene family [Source:HGNC Symbol;Acc:HGNC:9774]	42688761	42704876	-	-837	sense_overlapping
chr14	LNC_000854	XLOC_050489	--	Novel_lncRNA	42690943	42691779	-	ENSSSCT00000031208	ENSSSCG00000029501	PLA2G1B	phospholipase A2 group IB [Source:HGNC Symbol;Acc:HGNC:9030]	42638418	42829127	+	-837	antisense
chr3	ALDBSSCT0000006970	ALDBSSCG0000004231	--	Annotated_lncRNA	140648268	140655068	+	ENSSSCT00000030705	ENSSSCG00000028755	TSSC1	tumor suppressing subtransferable candidate 1 [Source:HGNC Symbol;Acc:HGNC:12383]	140570745	140645632	+	2635	downstream
chr14	LNC_000852	XLOC_050395	--	Novel_lncRNA	34592722	34596322	-	ENSSSCT00000010775	ENSSSCG00000009831	CUX2	cut like homeobox 2 [Source:HGNC Symbol;Acc:HGNC:19347]	34535264	34585176	+	7545	downstream
chr14	LNC_000852	XLOC_050395	--	Novel_lncRNA	34592722	34596322	-	ENSSSCT00000010776	ENSSSCG00000009832	FAM109A	family with sequence similarity 109 member A [Source:HGNC Symbol;Acc:HGNC:26509]	34591296	34591955	-	766	upstream
chr9	ALDBSSCT0000011244	ALDBSSCG0000006828	--	Annotated_lncRNA	74084568	74089028	+	ENSSSCT00000017058	ENSSSCG00000015660	PFKFB2	6-phosphofructo-2-kinase/fructose-2,6-biphosphatase 2 [Source:HGNC Symbol;Acc:HGNC:8873]	74062411	74081066	+	3501	downstream
chr9	ALDBSSCT0000011244	ALDBSSCG0000006828	--	Annotated_lncRNA	74084568	74089028	+	ENSSSCT00000017059	ENSSSCG00000015661	C4BPB	complement component 4 binding protein beta [Source:HGNC Symbol;Acc:HGNC:1328]	74096099	74105705	+	7070	upstream
chr4	ALDBSSCT0000007597	ALDBSSCG0000004606	--	Annotated_lncRNA	82595829	82604801	+	ENSSSCT00000006846	ENSSSCG00000006247	PLAG1	PLAG1 zinc finger [Source:HGNC Symbol;Acc:HGNC:9045]	82606862	82608850	+	2060	upstream
chr3	ALDBSSCT0000006862	ALDBSSCG0000004182	--	Annotated_lncRNA	122108731	122109367	+	ENSSSCT00000009403	ENSSSCG00000008592	--	--	122067142	122107317	+	1413	downstream
chr10	ALDBSSCT0000001526	ALDBSSCG0000000928	--	Annotated_lncRNA	47718145	47722774	-	ENSSSCT00000030761	ENSSSCG00000023200	--	--	47710052	47710749	+	7395	downstream
chr6	ALDBSSCT0000009252	ALDBSSCG0000005637	--	Annotated_lncRNA	17973487	17976984	-	ENSSSCT00000003105	ENSSSCG00000002805	CFAP20	cilia and flagella associated protein 20 [Source:HGNC Symbol;Acc:HGNC:29523]	17978591	17993262	-	1606	downstream
chr1	ALDBSSCT0000000037	ALDBSSCG0000000021	--	Annotated_lncRNA	10150406	10235063	+	ENSSSCT00000004483	ENSSSCG00000004055	RSPH3	radial spoke 3 homolog [Source:HGNC Symbol;Acc:HGNC:21054]	10077340	10149319	+	1086	downstream
chr6	ALDBSSCT0000009251	ALDBSSCG0000005636	--	Annotated_lncRNA	17421839	17425684	-	ENSSSCT00000025301	ENSSSCG00000028723	CCDC102A	coiled-coil domain containing 102A [Source:HGNC Symbol;Acc:HGNC:28097]	17426723	17447550	-	1038	downstream
chr5	LNC_001541	XLOC_090341	--	Novel_lncRNA	93808611	93824411	+	ENSSSCT00000000995	ENSSSCG00000000911	--	--	93830785	93831153	+	6373	upstream
chr15	ALDBSSCT0000004346	ALDBSSCG0000002632	--	Annotated_lncRNA	145073729	145100991	+	ENSSSCT00000017711	ENSSSCG00000016265	--	--	145104683	145130125	-	3691	downstream
chr15	ALDBSSCT0000004346	ALDBSSCG0000002632	--	Annotated_lncRNA	145073729	145100991	+	ENSSSCT00000017710	ENSSSCG00000016265	--	--	145104683	145130125	-	3691	downstream
chr15	ALDBSSCT0000004345	ALDBSSCG0000002632	--	Annotated_lncRNA	145073723	145100991	+	ENSSSCT00000017711	ENSSSCG00000016265	--	--	145104683	145130125	-	3691	downstream
chr15	ALDBSSCT0000004345	ALDBSSCG0000002632	--	Annotated_lncRNA	145073723	145100991	+	ENSSSCT00000017710	ENSSSCG00000016265	--	--	145104683	145130125	-	3691	downstream
chr5	ALDBSSCT0000008478	ALDBSSCG0000005154	--	Annotated_lncRNA	2162429	2167414	-	ENSSSCT00000000025	ENSSSCG00000000024	PARVB	parvin beta [Source:HGNC Symbol;Acc:HGNC:14653]	2124931	2157974	+	4454	downstream
chr5	ALDBSSCT0000008478	ALDBSSCG0000005154	--	Annotated_lncRNA	2162429	2167414	-	ENSSSCT00000000026	ENSSSCG00000000025	PARVG	parvin, gamma [Source:RefSeq peptide;Acc:NP_001231550]	2169173	2193456	+	1758	upstream
chr7	ALDBSSCT0000009894	ALDBSSCG0000006017	--	Annotated_lncRNA	100864492	100867060	+	ENSSSCT00000002593	ENSSSCG00000002330	PCNX1	pecanex homolog 1 (Drosophila) [Source:HGNC Symbol;Acc:HGNC:19740]	100745867	100862081	+	2410	downstream
chr9	ALDBSSCT0000011559	ALDBSSCG0000007017	--	Annotated_lncRNA	63070234	63070779	-	ENSSSCT00000016616	ENSSSCG00000015247	ZBTB44	zinc finger and BTB domain containing 44 [Source:HGNC Symbol;Acc:HGNC:25001]	63071808	63135751	+	1028	upstream
chr9	ALDBSSCT0000011559	ALDBSSCG0000007017	--	Annotated_lncRNA	63070234	63070779	-	ENSSSCT00000032122	ENSSSCG00000015247	ZBTB44	zinc finger and BTB domain containing 44 [Source:HGNC Symbol;Acc:HGNC:25001]	63071808	63136385	+	1028	upstream
chr1	ALDBSSCT0000000320	ALDBSSCG0000000186	--	Annotated_lncRNA	155395789	155403534	+	ENSSSCT00000005323	ENSSSCG00000004821	ASB7	ankyrin repeat and SOCS box containing 7 [Source:HGNC Symbol;Acc:HGNC:17182]	155405691	155444614	+	2156	upstream
chr9	ALDBSSCT0000011482	ALDBSSCG0000006989	--	Annotated_lncRNA	40835708	40837691	-	ENSSSCT00000028051	ENSSSCG00000025606	--	--	40746503	40833540	-	2167	upstream
GL895140.1	LNC_000154	XLOC_009097	--	Novel_lncRNA	6356	7146	+	ENSSSCT00000016093	ENSSSCG00000014742	--	--	8725	10199	-	1578	downstream
GL895140.1	LNC_000154	XLOC_009097	--	Novel_lncRNA	6356	7146	+	ENSSSCT00000027463	ENSSSCG00000014742	--	--	9114	10223	-	1967	downstream
chr3	ALDBSSCT0000006641	ALDBSSCG0000004062	--	Annotated_lncRNA	38882297	38884454	+	ENSSSCT00000008703	ENSSSCG00000007941	CDIP1	cell death inducing p53 target 1 [Source:HGNC Symbol;Acc:HGNC:13234]	38890996	38894684	+	6541	upstream
chr3	ALDBSSCT0000006646	ALDBSSCG0000004065	--	Annotated_lncRNA	40058933	40063268	+	ENSSSCT00000008719	ENSSSCG00000007956	NLRC3	NLR family CARD domain containing 3 [Source:HGNC Symbol;Acc:HGNC:29889]	40030863	40049513	-	9419	upstream
chr13	LNC_000705	XLOC_041918	--	Novel_lncRNA	170350490	170359667	+	ENSSSCT00000013106	ENSSSCG00000011977	--	--	170350018	170362339	-	-9178	antisense
chr13	LNC_000704	XLOC_041918	--	Novel_lncRNA	170350073	170359667	+	ENSSSCT00000013106	ENSSSCG00000011977	--	--	170350018	170362339	-	-9595	antisense
chr13	LNC_000707	XLOC_042086	--	Novel_lncRNA	189561117	189575299	+	ENSSSCT00000013138	ENSSSCG00000012007	HSPA13	heat shock protein family A (Hsp70) member 13 [Source:HGNC Symbol;Acc:HGNC:11375]	189549389	189561047	-	69	upstream
chr13	LNC_000703	XLOC_041876	--	Novel_lncRNA	167153723	167178028	+	ENSSSCT00000022387	ENSSSCG00000021791	SENP7	SUMO1/sentrin specific peptidase 7 [Source:HGNC Symbol;Acc:HGNC:30402]	167016012	167153371	+	351	downstream
JH118803.1	LNC_000253	XLOC_015477	--	Novel_lncRNA	57734	185116	-	ENSSSCT00000024910	ENSSSCG00000028515	--	--	190250	198501	+	5133	upstream
JH118803.1	LNC_000253	XLOC_015477	--	Novel_lncRNA	57734	185116	-	ENSSSCT00000024880	ENSSSCG00000023134	--	--	188549	190149	+	3432	upstream
chr13	ALDBSSCT0000003109	ALDBSSCG0000001866	--	Annotated_lncRNA	36885595	36887973	-	ENSSSCT00000012501	ENSSSCG00000011421	MANF	mesencephalic astrocyte-derived neurotrophic factor [Source:HGNC Symbol;Acc:HGNC:15461]	36895068	36899306	-	7094	downstream
chr13	ALDBSSCT0000003109	ALDBSSCG0000001866	--	Annotated_lncRNA	36885595	36887973	-	ENSSSCT00000012500	ENSSSCG00000011420	RBM15B	RNA binding motif protein 15B [Source:HGNC Symbol;Acc:HGNC:24303]	36890397	36893078	-	2423	downstream
JH118803.1	LNC_000252	XLOC_015472	--	Novel_lncRNA	167990	184104	+	ENSSSCT00000024910	ENSSSCG00000028515	--	--	190250	198501	+	6145	upstream
JH118803.1	LNC_000252	XLOC_015472	--	Novel_lncRNA	167990	184104	+	ENSSSCT00000024880	ENSSSCG00000023134	--	--	188549	190149	+	4444	upstream
chr5	LNC_001496	XLOC_087813	--	Novel_lncRNA	3760318	3765704	+	ENSSSCT00000000046	ENSSSCG00000000042	--	--	3765982	3774187	-	277	downstream
chr5	LNC_001497	XLOC_087937	--	Novel_lncRNA	6074124	6077770	+	ENSSSCT00000000092	ENSSSCG00000000086	--	--	6080536	6081381	-	2765	downstream
chr4	LNC_001490	XLOC_087641	--	Novel_lncRNA	139634579	139639766	-	ENSSSCT00000034978	ENSSSCG00000006923	GBP2	-	139620866	139633483	-	1095	upstream
chr4	LNC_001490	XLOC_087641	--	Novel_lncRNA	139634579	139639766	-	ENSSSCT00000007583	ENSSSCG00000006923	GBP2	-	139612347	139633862	-	716	upstream
chr4	LNC_001490	XLOC_087641	--	Novel_lncRNA	139634579	139639766	-	ENSSSCT00000032794	ENSSSCG00000006923	GBP2	-	139612353	139633853	-	725	upstream
chr4	LNC_001491	XLOC_087648	--	Novel_lncRNA	139788495	139791767	-	ENSSSCT00000007587	ENSSSCG00000006926	GTF2B	general transcription factor IIB [Source:HGNC Symbol;Acc:HGNC:4648]	139748001	139784472	+	4022	downstream
chr6	ALDBSSCT0000009078	ALDBSSCG0000005540	--	Annotated_lncRNA	125496907	125500573	+	ENSSSCT00000004173	ENSSSCG00000003771	FUBP1	far upstream element binding protein 1 [Source:HGNC Symbol;Acc:HGNC:4004]	125463272	125495775	+	1131	downstream
chr6	ALDBSSCT0000009078	ALDBSSCG0000005540	--	Annotated_lncRNA	125496907	125500573	+	ENSSSCT00000004170	ENSSSCG00000003768	NEXN	nexilin F-actin binding protein [Source:HGNC Symbol;Acc:HGNC:29557]	125501639	125693958	-	1065	downstream
chr6	ALDBSSCT0000009078	ALDBSSCG0000005540	--	Annotated_lncRNA	125496907	125500573	+	ENSSSCT00000029114	ENSSSCG00000003768	NEXN	nexilin F-actin binding protein [Source:HGNC Symbol;Acc:HGNC:29557]	125501540	125693958	-	966	downstream
chr6	ALDBSSCT0000009078	ALDBSSCG0000005540	--	Annotated_lncRNA	125496907	125500573	+	ENSSSCT00000004169	ENSSSCG00000003771	FUBP1	far upstream element binding protein 1 [Source:HGNC Symbol;Acc:HGNC:4004]	125463272	125495641	+	1265	downstream
chr5	LNC_001498	XLOC_087971	--	Novel_lncRNA	7643280	7645783	+	ENSSSCT00000000131	ENSSSCG00000000125	LGALS1	lectin, galactoside-binding, soluble, 1 [Source:HGNC Symbol;Acc:HGNC:6561]	7642312	7646221	-	-2504	antisense
chr5	LNC_001498	XLOC_087971	--	Novel_lncRNA	7643280	7645783	+	ENSSSCT00000025870	ENSSSCG00000021663	--	--	7630612	7637369	-	5910	upstream
chr5	LNC_001499	XLOC_088000	--	Novel_lncRNA	8594366	8599093	+	ENSSSCT00000000145	ENSSSCG00000000139	IFT27	intraflagellar transport 27 [Source:HGNC Symbol;Acc:HGNC:18626]	8602195	8616175	+	3101	upstream
chr3	ALDBSSCT0000006886	ALDBSSCG0000004197	--	Annotated_lncRNA	126848179	127113693	+	ENSSSCT00000009417	ENSSSCG00000008606	--	--	126843692	126844327	+	3851	downstream
chr5	ALDBSSCT0000008564	ALDBSSCG0000005210	--	Annotated_lncRNA	43570659	43572781	-	ENSSSCT00000029447	ENSSSCG00000026719	--	--	43574116	43581285	-	1334	downstream
chr5	ALDBSSCT0000008272	ALDBSSCG0000005020	--	Annotated_lncRNA	15824342	15854639	+	ENSSSCT00000000212	ENSSSCG00000000199	--	--	15859922	15982442	-	5282	downstream
chr5	ALDBSSCT0000008270	ALDBSSCG0000005019	--	Annotated_lncRNA	15638098	15664720	+	ENSSSCT00000000207	ENSSSCG00000000194	TUBA1C	tubulin alpha 1c [Source:HGNC Symbol;Acc:HGNC:20768]	15667323	15676220	+	2602	upstream
chr3	ALDBSSCT0000007056	ALDBSSCG0000004290	--	Annotated_lncRNA	22227017	22232732	-	ENSSSCT00000032231	ENSSSCG00000026077	--	--	22202581	22221915	+	5101	downstream
chr8	LNC_001870	XLOC_111148	--	Novel_lncRNA	110326902	110330115	-	ENSSSCT00000029448	ENSSSCG00000026698	--	--	110329810	110365693	+	-306	antisense
chr3	ALDBSSCT0000007053	ALDBSSCG0000004289	--	Annotated_lncRNA	21813662	21827331	-	ENSSSCT00000025169	ENSSSCG00000007823	--	--	21828112	21892488	+	780	upstream
chr3	ALDBSSCT0000007053	ALDBSSCG0000004289	--	Annotated_lncRNA	21813662	21827331	-	ENSSSCT00000008572	ENSSSCG00000007823	--	--	21828112	21892439	+	780	upstream
chr18	ALDBSSCT0000005643	ALDBSSCG0000003421	--	Annotated_lncRNA	9679415	9684475	-	ENSSSCT00000028640	ENSSSCG00000016496	ADCK2	aarF domain containing kinase 2 [Source:HGNC Symbol;Acc:HGNC:19039]	9657475	9676103	-	3311	upstream
chr18	ALDBSSCT0000005643	ALDBSSCG0000003421	--	Annotated_lncRNA	9679415	9684475	-	ENSSSCT00000017960	ENSSSCG00000016496	ADCK2	aarF domain containing kinase 2 [Source:HGNC Symbol;Acc:HGNC:19039]	9657475	9676103	-	3311	upstream
chr18	ALDBSSCT0000005643	ALDBSSCG0000003421	--	Annotated_lncRNA	9679415	9684475	-	ENSSSCT00000017961	ENSSSCG00000016497	DENND2A	DENN domain containing 2A [Source:HGNC Symbol;Acc:HGNC:22212]	9690444	9816705	+	5968	upstream
chr2	ALDBSSCT0000006507	ALDBSSCG0000003977	--	Annotated_lncRNA	157314487	157318413	-	ENSSSCT00000032981	ENSSSCG00000014434	IL17B	interleukin 17B [Source:HGNC Symbol;Acc:HGNC:5982]	157307150	157311035	-	3451	upstream
chr2	ALDBSSCT0000006507	ALDBSSCG0000003977	--	Annotated_lncRNA	157314487	157318413	-	ENSSSCT00000015779	ENSSSCG00000014434	IL17B	interleukin 17B [Source:HGNC Symbol;Acc:HGNC:5982]	157307147	157311262	-	3224	upstream
chr5	ALDBSSCT0000008293	ALDBSSCG0000005036	--	Annotated_lncRNA	26710368	26807270	+	ENSSSCT00000000492	ENSSSCG00000000456	SLC16A7	solute carrier family 16 member 7 [Source:HGNC Symbol;Acc:HGNC:10928]	26810232	26867980	+	2961	upstream
chr14	ALDBSSCT0000003740	ALDBSSCG0000002239	--	Annotated_lncRNA	122032748	122034093	+	ENSSSCT00000031910	ENSSSCG00000022693	LBX1	ladybird homeobox 1 [Source:HGNC Symbol;Acc:HGNC:16960]	122027606	122029561	-	3186	upstream
chr13	LNC_000636	XLOC_038445	--	Novel_lncRNA	14300969	14317859	+	ENSSSCT00000012280	ENSSSCG00000011214	NGLY1	N-glycanase 1 [Source:HGNC Symbol;Acc:HGNC:17646]	14229338	14292192	-	8776	upstream
chr13	LNC_000636	XLOC_038445	--	Novel_lncRNA	14300969	14317859	+	ENSSSCT00000012281	ENSSSCG00000011215	--	--	14291815	14296664	+	4304	downstream
chr12	ALDBSSCT0000002343	ALDBSSCG0000001417	--	Annotated_lncRNA	3995414	3996921	-	ENSSSCT00000018692	ENSSSCG00000017168	SEPT9	septin 9 [Source:HGNC Symbol;Acc:HGNC:7323]	4003723	4153387	-	6801	downstream
chr12	ALDBSSCT0000002342	ALDBSSCG0000001417	--	Annotated_lncRNA	3985470	3996925	-	ENSSSCT00000018692	ENSSSCG00000017168	SEPT9	septin 9 [Source:HGNC Symbol;Acc:HGNC:7323]	4003723	4153387	-	6797	downstream
chr13	ALDBSSCT0000002612	ALDBSSCG0000001588	--	Annotated_lncRNA	34299932	34309880	+	ENSSSCT00000012424	ENSSSCG00000011347	NME6	NME/NM23 nucleoside diphosphate kinase 6 [Source:HGNC Symbol;Acc:HGNC:20567]	34294969	34298953	-	978	upstream
chr13	ALDBSSCT0000002612	ALDBSSCG0000001588	--	Annotated_lncRNA	34299932	34309880	+	ENSSSCT00000012423	ENSSSCG00000011346	--	--	34290453	34293027	-	6904	upstream
chr7	LNC_001726	XLOC_102399	--	Novel_lncRNA	81874120	81878349	+	ENSSSCT00000002296	ENSSSCG00000002053	TRDV2	T cell receptor delta variable 2 [Source:HGNC Symbol;Acc:HGNC:12263]	81884262	81884708	-	5912	downstream
chr14	ALDBSSCT0000003749	ALDBSSCG0000002245	--	Annotated_lncRNA	131421905	131430546	+	ENSSSCT00000011617	ENSSSCG00000010621	ADD3	adducin 3 [Source:HGNC Symbol;Acc:HGNC:245]	131288632	131418839	+	3065	downstream
chr9	ALDBSSCT0000011643	ALDBSSCG0000007068	--	Annotated_lncRNA	110036525	110039045	-	ENSSSCT00000034552	ENSSSCG00000015405	CD36	-	110040077	110081135	-	1031	downstream
chr9	ALDBSSCT0000011643	ALDBSSCG0000007068	--	Annotated_lncRNA	110036525	110039045	-	ENSSSCT00000016780	ENSSSCG00000015405	CD36	-	110040077	110102645	-	1031	downstream
chr5	ALDBSSCT0000008615	ALDBSSCG0000005243	--	Annotated_lncRNA	76448186	76450231	-	ENSSSCT00000027399	ENSSSCG00000026973	--	--	76457234	76468320	+	7002	upstream
chr4	ALDBSSCT0000007692	ALDBSSCG0000004671	--	Annotated_lncRNA	119863677	119875288	+	ENSSSCT00000007450	ENSSSCG00000006802	KCNA3	potassium voltage-gated channel subfamily A member 3 [Source:HGNC Symbol;Acc:HGNC:6221]	119861134	119862900	+	776	downstream
chr7	ALDBSSCT0000009711	ALDBSSCG0000005932	--	Annotated_lncRNA	35767615	35769635	+	ENSSSCT00000001709	ENSSSCG00000001534	ANKS1A	ankyrin repeat and SAM domain-containing protein 1A [Source:RefSeq peptide;Acc:NP_001233193]	35556631	35766117	+	1497	downstream
chr4	ALDBSSCT0000007696	ALDBSSCG0000004674	--	Annotated_lncRNA	121465810	121472608	+	ENSSSCT00000007490	ENSSSCG00000006839	--	--	121475247	121485101	+	2638	upstream
chr4	ALDBSSCT0000007696	ALDBSSCG0000004674	--	Annotated_lncRNA	121465810	121472608	+	ENSSSCT00000007488	ENSSSCG00000006837	C1orf194	chromosome 1 open reading frame 194 [Source:HGNC Symbol;Acc:HGNC:32331]	121449539	121456283	+	9526	downstream
chr4	ALDBSSCT0000007696	ALDBSSCG0000004674	--	Annotated_lncRNA	121465810	121472608	+	ENSSSCT00000007489	ENSSSCG00000006838	TMEM167B	transmembrane protein 167B [Source:HGNC Symbol;Acc:HGNC:30187]	121462742	121463763	-	2046	upstream
chr4	ALDBSSCT0000007729	ALDBSSCG0000004694	--	Annotated_lncRNA	135582252	135584928	+	ENSSSCT00000007551	ENSSSCG00000006896	TMED5	transmembrane p24 trafficking protein 5 [Source:HGNC Symbol;Acc:HGNC:24251]	135564674	135581598	+	653	downstream
chr6	ALDBSSCT0000008859	ALDBSSCG0000005414	--	Annotated_lncRNA	51608949	51623119	+	ENSSSCT00000003585	ENSSSCG00000003226	CD33	-	51581787	51600200	+	8748	downstream
chr5	LNC_001556	XLOC_091247	--	Novel_lncRNA	15185782	15189236	-	ENSSSCT00000000185	ENSSSCG00000000176	CACNB3	calcium voltage-gated channel auxiliary subunit beta 3 [Source:HGNC Symbol;Acc:HGNC:1403]	15172903	15182025	+	3756	downstream
chr6	ALDBSSCT0000008852	ALDBSSCG0000005407	--	Annotated_lncRNA	48552132	48553912	+	ENSSSCT00000003453	ENSSSCG00000003113	C5AR2	complement component 5a receptor 2 [Source:HGNC Symbol;Acc:HGNC:4527]	48550461	48551474	+	657	downstream
chr6	ALDBSSCT0000008852	ALDBSSCG0000005407	--	Annotated_lncRNA	48552132	48553912	+	ENSSSCT00000003454	ENSSSCG00000003114	DHX34	DEAH-box helicase 34 [Source:HGNC Symbol;Acc:HGNC:16719]	48557154	48587375	+	3241	upstream
chr2	ALDBSSCT0000006478	ALDBSSCG0000003956	--	Annotated_lncRNA	147192945	147195168	-	ENSSSCT00000015685	ENSSSCG00000014356	DNAJC18	DnaJ heat shock protein family (Hsp40) member C18 [Source:HGNC Symbol;Acc:HGNC:28429]	147196150	147212221	-	981	downstream
chr6	ALDBSSCT0000008857	ALDBSSCG0000005412	--	Annotated_lncRNA	51174375	51180357	+	ENSSSCT00000003573	ENSSSCG00000003217	JOSD2	Josephin domain containing 2 [Source:HGNC Symbol;Acc:HGNC:28853]	51185527	51189977	-	5169	downstream
chr6	ALDBSSCT0000008857	ALDBSSCG0000005412	--	Annotated_lncRNA	51174375	51180357	+	ENSSSCT00000003577	ENSSSCG00000003219	FAM71E1	family with sequence similarity 71 member E1 [Source:HGNC Symbol;Acc:HGNC:25107]	51159342	51165097	-	9277	upstream
chr6	ALDBSSCT0000008857	ALDBSSCG0000005412	--	Annotated_lncRNA	51174375	51180357	+	ENSSSCT00000022461	ENSSSCG00000023211	ASPDH	aspartate dehydrogenase domain containing [Source:HGNC Symbol;Acc:HGNC:33856]	51190320	51192512	-	9962	downstream
chr6	ALDBSSCT0000008857	ALDBSSCG0000005412	--	Annotated_lncRNA	51174375	51180357	+	ENSSSCT00000028973	ENSSSCG00000024391	EMC10	ER membrane protein complex subunit 10 [Source:HGNC Symbol;Acc:HGNC:27609]	51165004	51173214	+	1160	downstream
chr16	ALDBSSCT0000004845	ALDBSSCG0000002941	--	Annotated_lncRNA	70057573	70059628	+	ENSSSCT00000018556	ENSSSCG00000017043	RNF145	ring finger protein 145 [Source:HGNC Symbol;Acc:HGNC:20853]	70068344	70114690	+	8715	upstream
chr12	ALDBSSCT0000002502	ALDBSSCG0000001512	--	Annotated_lncRNA	55483900	55500077	-	ENSSSCT00000019548	ENSSSCG00000021363	CHD3	chromodomain helicase DNA binding protein 3 [Source:HGNC Symbol;Acc:HGNC:1918]	55506216	55528405	+	6138	upstream
chr12	ALDBSSCT0000002502	ALDBSSCG0000001512	--	Annotated_lncRNA	55483900	55500077	-	ENSSSCT00000019543	ENSSSCG00000017959	--	--	55477994	55480308	+	3591	downstream
chr12	ALDBSSCT0000002502	ALDBSSCG0000001512	--	Annotated_lncRNA	55483900	55500077	-	ENSSSCT00000019545	ENSSSCG00000030690	--	--	55475732	55476353	+	7546	downstream
chr12	ALDBSSCT0000002502	ALDBSSCG0000001512	--	Annotated_lncRNA	55483900	55500077	-	ENSSSCT00000019546	ENSSSCG00000017962	KDM6B	lysine demethylase 6B [Source:HGNC Symbol;Acc:HGNC:29012]	55465577	55474333	+	9566	downstream
chr12	ALDBSSCT0000002506	ALDBSSCG0000001514	--	Annotated_lncRNA	55895278	55901389	-	ENSSSCT00000025604	ENSSSCG00000028924	AURKB	aurora kinase B [Source:HGNC Symbol;Acc:HGNC:11390]	55886067	55890688	-	4589	upstream
chr12	ALDBSSCT0000002506	ALDBSSCG0000001514	--	Annotated_lncRNA	55895278	55901389	-	ENSSSCT00000027166	ENSSSCG00000026818	CTC1	CTS telomere maintenance complex component 1 [Source:HGNC Symbol;Acc:HGNC:26169]	55903975	55926165	-	2585	downstream
chr12	ALDBSSCT0000002505	ALDBSSCG0000001514	--	Annotated_lncRNA	55895278	55898527	-	ENSSSCT00000025604	ENSSSCG00000028924	AURKB	aurora kinase B [Source:HGNC Symbol;Acc:HGNC:11390]	55886067	55890688	-	4589	upstream
chr12	ALDBSSCT0000002505	ALDBSSCG0000001514	--	Annotated_lncRNA	55895278	55898527	-	ENSSSCT00000027166	ENSSSCG00000026818	CTC1	CTS telomere maintenance complex component 1 [Source:HGNC Symbol;Acc:HGNC:26169]	55903975	55926165	-	5447	downstream
chr8	ALDBSSCT0000010386	ALDBSSCG0000006308	--	Annotated_lncRNA	3414277	3423635	+	ENSSSCT00000027777	ENSSSCG00000022867	--	--	3396723	3413719	-	557	upstream
chr11	LNC_000525	XLOC_032054	--	Novel_lncRNA	56949913	56966965	+	ENSSSCT00000010397	ENSSSCG00000009482	SPRY2	sprouty RTK signaling antagonist 2 [Source:HGNC Symbol;Acc:HGNC:11270]	56943821	56944768	-	5144	upstream
chr11	LNC_000526	XLOC_032054	--	Novel_lncRNA	56951740	56966965	+	ENSSSCT00000010397	ENSSSCG00000009482	SPRY2	sprouty RTK signaling antagonist 2 [Source:HGNC Symbol;Acc:HGNC:11270]	56943821	56944768	-	6971	upstream
chr11	LNC_000520	XLOC_031659	--	Novel_lncRNA	21448039	21454302	+	ENSSSCT00000010311	ENSSSCG00000009410	--	--	21427647	21445316	+	2722	downstream
chr11	LNC_000523	XLOC_031964	--	Novel_lncRNA	48598662	48629379	+	ENSSSCT00000010367	ENSSSCG00000009457	--	--	48302561	48598619	-	42	upstream
chr12	ALDBSSCT0000002185	ALDBSSCG0000001307	--	Annotated_lncRNA	15181791	15193740	+	ENSSSCT00000018822	ENSSSCG00000017290	--	--	15201986	15208037	+	8245	upstream
chr12	ALDBSSCT0000002185	ALDBSSCG0000001307	--	Annotated_lncRNA	15181791	15193740	+	ENSSSCT00000030857	ENSSSCG00000028698	CCDC47	coiled-coil domain containing 47 [Source:HGNC Symbol;Acc:HGNC:24856]	15155060	15174686	+	7104	downstream
chr12	ALDBSSCT0000002183	ALDBSSCG0000001305	--	Annotated_lncRNA	14864324	14869427	+	ENSSSCT00000018810	ENSSSCG00000017278	TEX2	testis expressed 2 [Source:HGNC Symbol;Acc:HGNC:30884]	14801043	14859912	+	4411	downstream
chr16	LNC_001033	XLOC_061606	--	Novel_lncRNA	55745146	55762233	-	ENSSSCT00000036623	ENSSSCG00000016991	DUSP1	dual specificity phosphatase 1 [Source:HGNC Symbol;Acc:HGNC:3064]	55769330	55770966	+	7096	upstream
chr16	LNC_001033	XLOC_061606	--	Novel_lncRNA	55745146	55762233	-	ENSSSCT00000018501	ENSSSCG00000016991	DUSP1	dual specificity phosphatase 1 [Source:HGNC Symbol;Acc:HGNC:3064]	55768409	55771513	+	6175	upstream
chr16	LNC_001033	XLOC_061606	--	Novel_lncRNA	55745146	55762233	-	ENSSSCT00000033376	ENSSSCG00000016991	DUSP1	dual specificity phosphatase 1 [Source:HGNC Symbol;Acc:HGNC:3064]	55768884	55770135	+	6650	upstream
chr16	LNC_001033	XLOC_061606	--	Novel_lncRNA	55745146	55762233	-	ENSSSCT00000035952	ENSSSCG00000016991	DUSP1	dual specificity phosphatase 1 [Source:HGNC Symbol;Acc:HGNC:3064]	55768467	55771035	+	6233	upstream
GL893911.1	ALDBSSCT0000011821	ALDBSSCG0000007177	--	Annotated_lncRNA	15262	23800	+	ENSSSCT00000028595	ENSSSCG00000026702	--	--	5858	13616	+	1645	downstream
GL893911.1	ALDBSSCT0000011821	ALDBSSCG0000007177	--	Annotated_lncRNA	15262	23800	+	ENSSSCT00000023779	ENSSSCG00000022063	--	--	5217	5779	+	9482	downstream
chr16	ALDBSSCT0000004775	ALDBSSCG0000002906	--	Annotated_lncRNA	42882798	42946220	+	ENSSSCT00000025662	ENSSSCG00000027763	--	--	42832716	42874957	+	7840	downstream
chr16	ALDBSSCT0000004775	ALDBSSCG0000002906	--	Annotated_lncRNA	42882798	42946220	+	ENSSSCT00000018443	ENSSSCG00000016935	SMIM15	small integral membrane protein 15 [Source:HGNC Symbol;Acc:HGNC:33861]	42880067	42880291	-	2506	upstream
chr17	ALDBSSCT0000005349	ALDBSSCG0000003236	--	Annotated_lncRNA	42398249	42405006	-	ENSSSCT00000031532	ENSSSCG00000030702	--	--	42387887	42388533	-	9715	upstream
chr17	ALDBSSCT0000005345	ALDBSSCG0000003234	--	Annotated_lncRNA	39606114	39608973	-	ENSSSCT00000007887	ENSSSCG00000007208	TRIB3	tribbles pseudokinase 3 [Source:HGNC Symbol;Acc:HGNC:16228]	39529696	39602957	-	3156	upstream
chr2	LNC_001153	XLOC_069527	--	Novel_lncRNA	77902857	77913478	+	ENSSSCT00000031752	ENSSSCG00000022265	C19orf25	chromosome 19 open reading frame 25 [Source:HGNC Symbol;Acc:HGNC:26711]	77891286	77895615	+	7241	downstream
chr2	LNC_001151	XLOC_069214	--	Novel_lncRNA	69570360	69571922	+	ENSSSCT00000028686	ENSSSCG00000027962	--	--	69560726	69567024	+	3335	downstream
chr2	LNC_001150	XLOC_069206	--	Novel_lncRNA	69391047	69401293	+	ENSSSCT00000014922	ENSSSCG00000013658	S1PR2	sphingosine-1-phosphate receptor 2 [Source:HGNC Symbol;Acc:HGNC:3169]	69377718	69384593	-	6453	upstream
chr2	LNC_001150	XLOC_069206	--	Novel_lncRNA	69391047	69401293	+	ENSSSCT00000014920	ENSSSCG00000013656	MRPL4	mitochondrial ribosomal protein L4 [Source:HGNC Symbol;Acc:HGNC:14276]	69401370	69417278	+	76	upstream
chr18	ALDBSSCT0000005646	ALDBSSCG0000003424	--	Annotated_lncRNA	11508310	11510821	-	ENSSSCT00000017986	ENSSSCG00000016518	--	--	11520082	11527315	-	9260	downstream
chr18	ALDBSSCT0000005646	ALDBSSCG0000003424	--	Annotated_lncRNA	11508310	11510821	-	ENSSSCT00000017985	ENSSSCG00000016517	SVOPL	SVOP like [Source:HGNC Symbol;Acc:HGNC:27034]	11441396	11506178	+	2131	downstream
chr14	ALDBSSCT0000003966	ALDBSSCG0000002389	--	Annotated_lncRNA	71478782	71509369	-	ENSSSCT00000011189	ENSSSCG00000010223	ADO	2-aminoethanethiol dioxygenase [Source:HGNC Symbol;Acc:HGNC:23506]	71510329	71511141	+	959	upstream
chr14	ALDBSSCT0000003966	ALDBSSCG0000002389	--	Annotated_lncRNA	71478782	71509369	-	ENSSSCT00000011190	ENSSSCG00000010224	EGR2	early growth response 2 [Source:HGNC Symbol;Acc:HGNC:3239]	71516963	71521113	-	7593	downstream
chr18	ALDBSSCT0000005525	ALDBSSCG0000003350	--	Annotated_lncRNA	42733895	42751353	+	ENSSSCT00000028124	ENSSSCG00000027063	DPY19L1	dpy-19 like 1 [Source:HGNC Symbol;Acc:HGNC:22205]	42650213	42732527	+	1367	downstream
chr18	ALDBSSCT0000005528	ALDBSSCG0000003351	--	Annotated_lncRNA	42892100	42914690	+	ENSSSCT00000018143	ENSSSCG00000016664	NPSR1	neuropeptide S receptor 1 [Source:HGNC Symbol;Acc:HGNC:23631]	42772920	42889244	-	2855	upstream
chr1	ENSSSCT00000036045	ENSSSCG00000004943	MAP2K1	Annotated_lncRNA	182187872	182222849	-	ENSSSCT00000005457	ENSSSCG00000004945	RPL4	ribosomal protein L4 [Source:HGNC Symbol;Acc:HGNC:10353]	182226366	182231629	-	3516	downstream
chr1	ENSSSCT00000036045	ENSSSCG00000004943	MAP2K1	Annotated_lncRNA	182187872	182222849	-	ENSSSCT00000025296	ENSSSCG00000023980	SNAPC5	small nuclear RNA activating complex polypeptide 5 [Source:HGNC Symbol;Acc:HGNC:15484]	182181554	182190396	+	-2525	antisense
chr11	ALDBSSCT0000001846	ALDBSSCG0000001112	--	Annotated_lncRNA	86623330	86632050	+	ENSSSCT00000010486	ENSSSCG00000009565	GAS6	growth arrest specific 6 [Source:HGNC Symbol;Acc:HGNC:4168]	86582119	86614652	-	8677	upstream
chr16	ALDBSSCT0000004904	ALDBSSCG0000002972	--	Annotated_lncRNA	21402013	21402736	-	ENSSSCT00000018321	ENSSSCG00000016826	RAD1	RAD1 checkpoint DNA exonuclease [Source:HGNC Symbol;Acc:HGNC:9806]	21405694	21414047	-	2957	downstream
chr3	ALDBSSCT0000007308	ALDBSSCG0000004435	--	Annotated_lncRNA	117294000	117298170	-	ENSSSCT00000009343	ENSSSCG00000008539	--	--	117279555	117287358	+	6641	downstream
chr16	ALDBSSCT0000004908	ALDBSSCG0000002974	--	Annotated_lncRNA	25729029	25732546	-	ENSSSCT00000018358	ENSSSCG00000016857	DAB2	DAB2, clathrin adaptor protein [Source:HGNC Symbol;Acc:HGNC:2662]	25736189	25907473	-	3642	downstream
chr8	LNC_001892	XLOC_112313	--	Novel_lncRNA	147760623	147789907	-	ENSSSCT00000010139	ENSSSCG00000009259	PAQR3	progestin and adipoQ receptor family member 3 [Source:HGNC Symbol;Acc:HGNC:30130]	147790045	147812920	+	137	upstream
chr11	ALDBSSCT0000001996	ALDBSSCG0000001205	--	Annotated_lncRNA	56092171	56096454	-	ENSSSCT00000028357	ENSSSCG00000009479	RBM26	RNA binding motif protein 26 [Source:HGNC Symbol;Acc:HGNC:20327]	56099822	56173051	-	3367	downstream
chr11	ALDBSSCT0000001996	ALDBSSCG0000001205	--	Annotated_lncRNA	56092171	56096454	-	ENSSSCT00000010394	ENSSSCG00000009479	RBM26	RNA binding motif protein 26 [Source:HGNC Symbol;Acc:HGNC:20327]	56098099	56146839	-	1644	downstream
chr2	ALDBSSCT0000006091	ALDBSSCG0000003728	--	Annotated_lncRNA	157510524	157604998	+	ENSSSCT00000015781	ENSSSCG00000014436	ARHGEF37	Rho guanine nucleotide exchange factor 37 [Source:HGNC Symbol;Acc:HGNC:34430]	157445243	157501653	+	8870	downstream
chr9	LNC_001933	XLOC_115752	--	Novel_lncRNA	146295859	146299315	+	ENSSSCT00000017008	ENSSSCG00000015614	--	--	146288284	146295762	-	96	upstream
chr9	LNC_001932	XLOC_115752	--	Novel_lncRNA	146295838	146299315	+	ENSSSCT00000017008	ENSSSCG00000015614	--	--	146288284	146295762	-	75	upstream
chr9	LNC_001939	XLOC_115824	--	Novel_lncRNA	153027571	153033296	+	ENSSSCT00000031277	ENSSSCG00000029423	--	--	153034135	153035709	+	838	upstream
chr4	ALDBSSCT0000007908	ALDBSSCG0000004791	--	Annotated_lncRNA	20951177	20974465	-	ENSSSCT00000006589	ENSSSCG00000027762	CU633166.1	-	20920744	20949267	+	1909	downstream
chr9	LNC_001895	XLOC_112919	--	Novel_lncRNA	18881978	18888454	+	ENSSSCT00000016254	ENSSSCG00000014899	PRCP	prolylcarboxypeptidase [Source:HGNC Symbol;Acc:HGNC:9344]	18898060	18972531	+	9605	upstream
chr9	LNC_001895	XLOC_112919	--	Novel_lncRNA	18881978	18888454	+	ENSSSCT00000016253	ENSSSCG00000014898	DDIAS	DNA damage induced apoptosis suppressor [Source:HGNC Symbol;Acc:HGNC:26351]	18876947	18896503	-	-6477	antisense
chr6	LNC_001692	XLOC_100263	--	Novel_lncRNA	152944024	152946970	-	ENSSSCT00000004328	ENSSSCG00000003913	--	--	152918981	152940807	-	3216	upstream
GL893088.1	LNC_000041	XLOC_002419	--	Novel_lncRNA	80680	83558	-	ENSSSCT00000010466	ENSSSCG00000009548	ANKRD10	ankyrin repeat domain 10 [Source:HGNC Symbol;Acc:HGNC:20265]	47293	76078	-	4601	upstream
chr1	LNC_000288	XLOC_016467	--	Novel_lncRNA	3263845	3268371	+	ENSSSCT00000004448	ENSSSCG00000004023	FGFR1OP	FGFR1 oncogene partner [Source:HGNC Symbol;Acc:HGNC:17012]	3234135	3263726	-	118	upstream
chr1	LNC_000287	XLOC_016467	--	Novel_lncRNA	3263845	3268371	+	ENSSSCT00000004448	ENSSSCG00000004023	FGFR1OP	FGFR1 oncogene partner [Source:HGNC Symbol;Acc:HGNC:17012]	3234135	3263726	-	118	upstream
chr8	LNC_001800	XLOC_106839	--	Novel_lncRNA	31510887	31511896	+	ENSSSCT00000026687	ENSSSCG00000022270	KLF3	Kruppel-like factor 3 (basic) [Source:HGNC Symbol;Acc:HGNC:16516]	31513438	31539470	+	1541	upstream
chr8	LNC_001807	XLOC_107191	--	Novel_lncRNA	49325771	49349196	+	ENSSSCT00000009714	ENSSSCG00000008873	FAM198B	family with sequence similarity 198 member B [Source:HGNC Symbol;Acc:HGNC:25312]	49264227	49325615	-	155	upstream
chr8	LNC_001809	XLOC_107302	--	Novel_lncRNA	69894843	69901107	+	ENSSSCT00000009772	ENSSSCG00000008924	UBA6	ubiquitin like modifier activating enzyme 6 [Source:HGNC Symbol;Acc:HGNC:25581]	69807548	69894666	-	176	upstream
chr8	LNC_001809	XLOC_107302	--	Novel_lncRNA	69894843	69901107	+	ENSSSCT00000009773	ENSSSCG00000008925	GNRHR	gonadotropin releasing hormone receptor [Source:HGNC Symbol;Acc:HGNC:4421]	69901152	69911347	-	44	downstream
chr8	LNC_001808	XLOC_107191	--	Novel_lncRNA	49325819	49349196	+	ENSSSCT00000009714	ENSSSCG00000008873	FAM198B	family with sequence similarity 198 member B [Source:HGNC Symbol;Acc:HGNC:25312]	49264227	49325615	-	203	upstream
chr4	LNC_001424	XLOC_084096	--	Novel_lncRNA	116196919	116217374	+	ENSSSCT00000007401	ENSSSCG00000006756	BCAS2	-	116180381	116190995	+	5923	downstream
chr7	ALDBSSCT0000010169	ALDBSSCG0000006192	--	Annotated_lncRNA	57684420	57689049	-	ENSSSCT00000002022	ENSSSCG00000001806	FSD2	fibronectin type III and SPRY domain containing 2 [Source:HGNC Symbol;Acc:HGNC:18024]	57653600	57679877	+	4542	downstream
chr1	ALDBSSCT0000000482	ALDBSSCG0000000287	--	Annotated_lncRNA	264741509	264753018	+	ENSSSCT00000005877	ENSSSCG00000005338	RECK	reversion inducing cysteine rich protein with kazal motifs [Source:HGNC Symbol;Acc:HGNC:11345]	264672809	264734347	-	7161	upstream
GL896212.1	LNC_000199	XLOC_011829	--	Novel_lncRNA	45	1052	-	ENSSSCT00000028020	ENSSSCG00000026290	BBS12	Bardet-Biedl syndrome 12 [Source:HGNC Symbol;Acc:HGNC:26648]	4809	6953	-	3756	downstream
GL896104.1	LNC_000190	XLOC_011543	--	Novel_lncRNA	4680	6724	-	ENSSSCT00000028168	ENSSSCG00000023109	GNL2	G protein nucleolar 2 [Source:HGNC Symbol;Acc:HGNC:29925]	16467	39848	-	9742	downstream
GL896104.1	LNC_000190	XLOC_011543	--	Novel_lncRNA	4680	6724	-	ENSSSCT00000030775	ENSSSCG00000022979	DNALI1	dynein axonemal light intermediate chain 1 [Source:HGNC Symbol;Acc:HGNC:14353]	7377	14758	+	652	upstream
chr7	LNC_001764	XLOC_104394	--	Novel_lncRNA	47135348	47160853	-	ENSSSCT00000001916	ENSSSCG00000022542	--	--	47170752	47171717	+	9898	upstream
chr1	ALDBSSCT0000000559	ALDBSSCG0000000330	--	Annotated_lncRNA	303870314	303870977	+	ENSSSCT00000006249	ENSSSCG00000005683	TOR1B	torsin family 1 member B [Source:HGNC Symbol;Acc:HGNC:11995]	303864106	303869260	+	1053	downstream
chr1	ALDBSSCT0000000559	ALDBSSCG0000000330	--	Annotated_lncRNA	303870314	303870977	+	ENSSSCT00000026039	ENSSSCG00000025964	TOR1A	torsin family 1, member A (torsin A) [Source:HGNC Symbol;Acc:HGNC:3098]	303871932	303882873	-	954	downstream
chr6	ALDBSSCT0000009081	ALDBSSCG0000005541	--	Annotated_lncRNA	125811821	125857266	+	ENSSSCT00000004174	ENSSSCG00000003772	ZZZ3	zinc finger ZZ-type containing 3 [Source:HGNC Symbol;Acc:HGNC:24523]	125864325	125945373	+	7058	upstream
chr6	ALDBSSCT0000009560	ALDBSSCG0000005831	--	Annotated_lncRNA	147838287	147839694	-	ENSSSCT00000004278	ENSSSCG00000003866	--	--	147835494	147835739	+	2547	downstream
chr8	ALDBSSCT0000010704	ALDBSSCG0000006483	--	Annotated_lncRNA	146970279	147020297	+	ENSSSCT00000010136	ENSSSCG00000009256	ANTXR2	anthrax toxin receptor 2 [Source:HGNC Symbol;Acc:HGNC:21732]	146872576	146964111	+	6167	downstream
chr8	ALDBSSCT0000010700	ALDBSSCG0000006479	--	Annotated_lncRNA	145845634	145846608	+	ENSSSCT00000026377	ENSSSCG00000029507	RASGEF1B	ras-GEF domain-containing family member 1B [Source:RefSeq peptide;Acc:NP_001182296]	145847327	145888793	+	718	upstream
chr7	ALDBSSCT0000010368	ALDBSSCG0000006297	--	Annotated_lncRNA	131294482	131299557	-	ENSSSCT00000002845	ENSSSCG00000002560	GPR132	G protein-coupled receptor 132 [Source:HGNC Symbol;Acc:HGNC:17482]	131288707	131289810	-	4671	upstream
chr7	ALDBSSCT0000010367	ALDBSSCG0000006296	--	Annotated_lncRNA	130866113	130867866	-	ENSSSCT00000002830	ENSSSCG00000002547	--	--	130869565	130891073	-	1698	downstream
chr16	LNC_000994	XLOC_059655	--	Novel_lncRNA	34155133	34164474	+	ENSSSCT00000018391	ENSSSCG00000016887	ITGA2	integrin subunit alpha 2 [Source:HGNC Symbol;Acc:HGNC:6137]	34164830	34262490	+	355	upstream
chr16	LNC_000994	XLOC_059655	--	Novel_lncRNA	34155133	34164474	+	ENSSSCT00000032891	ENSSSCG00000016887	ITGA2	integrin subunit alpha 2 [Source:HGNC Symbol;Acc:HGNC:6137]	34164849	34265784	+	374	upstream
chr6	ALDBSSCT0000009248	ALDBSSCG0000005633	--	Annotated_lncRNA	16452615	16465809	-	ENSSSCT00000003053	ENSSSCG00000002756	CYB5B	cytochrome b5 type B (outer mitochondrial membrane) [Source:HGNC Symbol;Acc:HGNC:24374]	16469802	16505285	-	3992	downstream
chr16	LNC_000991	XLOC_059591	--	Novel_lncRNA	29565750	29574602	+	ENSSSCT00000026832	ENSSSCG00000028734	--	--	29568386	29580049	-	-6217	antisense
chr16	LNC_000992	XLOC_059591	--	Novel_lncRNA	29565828	29574602	+	ENSSSCT00000026832	ENSSSCG00000028734	--	--	29568386	29580049	-	-6217	antisense
chr16	LNC_000999	XLOC_060077	--	Novel_lncRNA	54996898	55013137	+	ENSSSCT00000018492	ENSSSCG00000016982	--	--	54988239	54996836	-	61	upstream
chr6	ALDBSSCT0000009247	ALDBSSCG0000005632	--	Annotated_lncRNA	15056160	15057194	-	ENSSSCT00000003049	ENSSSCG00000002752	ZFHX3	zinc finger homeobox 3 [Source:HGNC Symbol;Acc:HGNC:777]	15060487	15160499	-	3292	downstream
chr5	LNC_001557	XLOC_091286	--	Novel_lncRNA	16153219	16153961	-	ENSSSCT00000000219	ENSSSCG00000000206	FAIM2	Fas apoptotic inhibitory molecule 2 [Source:HGNC Symbol;Acc:HGNC:17067]	16146375	16179708	+	-743	antisense
chr15	ALDBSSCT0000004488	ALDBSSCG0000002734	--	Annotated_lncRNA	70682527	70689189	-	ENSSSCT00000017282	ENSSSCG00000015871	NR4A2	nuclear receptor subfamily 4 group A member 2 [Source:HGNC Symbol;Acc:HGNC:7981]	70671007	70679616	-	2910	upstream
chr5	LNC_001555	XLOC_091139	--	Novel_lncRNA	9293484	9294608	-	ENSSSCT00000000158	ENSSSCG00000000150	--	--	9296018	9301607	-	1409	downstream
chr15	ALDBSSCT0000004335	ALDBSSCG0000002624	--	Annotated_lncRNA	139179859	139181574	+	ENSSSCT00000017674	ENSSSCG00000016232	MRPL44	mitochondrial ribosomal protein L44 [Source:HGNC Symbol;Acc:HGNC:16650]	139167795	139175783	+	4075	downstream
chr15	ALDBSSCT0000004335	ALDBSSCG0000002624	--	Annotated_lncRNA	139179859	139181574	+	ENSSSCT00000017676	ENSSSCG00000016233	SERPINE2	serpin family E member 2 [Source:HGNC Symbol;Acc:HGNC:8951]	139183910	139248957	-	2335	downstream
chr15	ALDBSSCT0000004335	ALDBSSCG0000002624	--	Annotated_lncRNA	139179859	139181574	+	ENSSSCT00000036636	ENSSSCG00000016233	SERPINE2	serpin family E member 2 [Source:HGNC Symbol;Acc:HGNC:8951]	139183910	139249592	-	2335	downstream
chr5	LNC_001553	XLOC_091088	--	Novel_lncRNA	7324082	7329119	-	ENSSSCT00000032519	ENSSSCG00000025336	--	--	7316084	7321915	+	2166	downstream
chr5	LNC_001550	XLOC_090647	--	Novel_lncRNA	104007118	104009445	+	ENSSSCT00000029091	ENSSSCG00000024065	--	--	103839593	104003136	-	3981	upstream
chr11	ALDBSSCT0000002030	ALDBSSCG0000001226	--	Annotated_lncRNA	73755210	73755960	-	ENSSSCT00000010423	ENSSSCG00000009506	--	--	73765040	73765354	-	9079	downstream
chr5	LNC_001559	XLOC_091307	--	Novel_lncRNA	16521314	16524497	-	ENSSSCT00000022818	ENSSSCG00000028272	--	--	16524560	16573127	+	62	upstream
chr5	LNC_001558	XLOC_091290	--	Novel_lncRNA	16190475	16197269	-	ENSSSCT00000027364	ENSSSCG00000026576	BCDIN3D	BCDIN3 domain containing RNA methyltransferase [Source:HGNC Symbol;Acc:HGNC:27050]	16197445	16207490	+	175	upstream
chr3	ALDBSSCT0000006654	ALDBSSCG0000004071	--	Annotated_lncRNA	40573495	40576614	+	ENSSSCT00000025347	ENSSSCG00000029641	ZSCAN10	zinc finger and SCAN domain containing 10 [Source:HGNC Symbol;Acc:HGNC:12997]	40581662	40587506	-	5047	downstream
chr3	ALDBSSCT0000006654	ALDBSSCG0000004071	--	Annotated_lncRNA	40573495	40576614	+	ENSSSCT00000025712	ENSSSCG00000029641	ZSCAN10	zinc finger and SCAN domain containing 10 [Source:HGNC Symbol;Acc:HGNC:12997]	40581662	40587399	-	5047	downstream
chr3	ALDBSSCT0000006654	ALDBSSCG0000004071	--	Annotated_lncRNA	40573495	40576614	+	ENSSSCT00000032217	ENSSSCG00000021569	MMP25	matrix metallopeptidase 25 [Source:HGNC Symbol;Acc:HGNC:14246]	40557830	40571815	+	1679	downstream
chr7	ALDBSSCT0000010015	ALDBSSCG0000006090	--	Annotated_lncRNA	3111076	3113749	-	ENSSSCT00000001088	ENSSSCG00000000998	RPP40	ribonuclease P/MRP subunit p40 [Source:HGNC Symbol;Acc:HGNC:20992]	3094490	3108404	-	2671	upstream
chr8	ALDBSSCT0000011011	ALDBSSCG0000006681	--	Annotated_lncRNA	144196432	144200622	-	ENSSSCT00000010112	ENSSSCG00000009233	GPAT3	glycerol-3-phosphate acyltransferase 3 [Source:HGNC Symbol;Acc:HGNC:28157]	144210507	144273732	-	9884	downstream
chr9	ALDBSSCT0000011542	ALDBSSCG0000007007	--	Annotated_lncRNA	50679328	50680252	-	ENSSSCT00000036199	ENSSSCG00000015093	CD3D	T-cell surface glycoprotein CD3 delta chain [Source:UniProtKB/Swiss-Prot;Acc:Q764N2]	50681775	50685300	-	1522	downstream
chr9	ALDBSSCT0000011542	ALDBSSCG0000007007	--	Annotated_lncRNA	50679328	50680252	-	ENSSSCT00000033998	ENSSSCG00000015093	CD3D	T-cell surface glycoprotein CD3 delta chain [Source:UniProtKB/Swiss-Prot;Acc:Q764N2]	50681845	50685276	-	1592	downstream
chr9	ALDBSSCT0000011542	ALDBSSCG0000007007	--	Annotated_lncRNA	50679328	50680252	-	ENSSSCT00000016459	ENSSSCG00000015093	CD3D	T-cell surface glycoprotein CD3 delta chain [Source:UniProtKB/Swiss-Prot;Acc:Q764N2]	50681495	50685267	-	1242	downstream
chr9	ALDBSSCT0000011542	ALDBSSCG0000007007	--	Annotated_lncRNA	50679328	50680252	-	ENSSSCT00000016458	ENSSSCG00000015092	CD3E	CD3e molecule, epsilon (CD3-TCR complex) [Source:HGNC Symbol;Acc:HGNC:1674]	50660810	50675098	+	4229	downstream
chr9	ALDBSSCT0000011542	ALDBSSCG0000007007	--	Annotated_lncRNA	50679328	50680252	-	ENSSSCT00000035817	ENSSSCG00000015094	CD3G	CD3g molecule [Source:HGNC Symbol;Acc:HGNC:1675]	50686452	50694237	+	6199	upstream
chr9	ALDBSSCT0000011542	ALDBSSCG0000007007	--	Annotated_lncRNA	50679328	50680252	-	ENSSSCT00000034310	ENSSSCG00000015093	CD3D	T-cell surface glycoprotein CD3 delta chain [Source:UniProtKB/Swiss-Prot;Acc:Q764N2]	50680925	50685383	-	672	downstream
chr9	ALDBSSCT0000011542	ALDBSSCG0000007007	--	Annotated_lncRNA	50679328	50680252	-	ENSSSCT00000034819	ENSSSCG00000015093	CD3D	T-cell surface glycoprotein CD3 delta chain [Source:UniProtKB/Swiss-Prot;Acc:Q764N2]	50681323	50685338	-	1070	downstream
chr9	ALDBSSCT0000011542	ALDBSSCG0000007007	--	Annotated_lncRNA	50679328	50680252	-	ENSSSCT00000016460	ENSSSCG00000015094	CD3G	CD3g molecule [Source:HGNC Symbol;Acc:HGNC:1675]	50686387	50696073	+	6134	upstream
chr3	ALDBSSCT0000006650	ALDBSSCG0000004067	--	Annotated_lncRNA	40281583	40285210	+	ENSSSCT00000008726	ENSSSCG00000007963	ZNF263	zinc finger protein 263 [Source:HGNC Symbol;Acc:HGNC:13056]	40293806	40300679	-	8595	downstream
chr3	ALDBSSCT0000006650	ALDBSSCG0000004067	--	Annotated_lncRNA	40281583	40285210	+	ENSSSCT00000023195	ENSSSCG00000026262	TIGD7	tigger transposable element derived 7 [Source:HGNC Symbol;Acc:HGNC:18331]	40286240	40287889	+	1029	upstream
chr14	LNC_000862	XLOC_050726	--	Novel_lncRNA	52991425	53000770	-	ENSSSCT00000011021	ENSSSCG00000010060	UPB1	beta-ureidopropionase 1 [Source:HGNC Symbol;Acc:HGNC:16297]	52974996	53004470	+	-9346	antisense
chr14	LNC_000864	XLOC_050787	--	Novel_lncRNA	54544630	54552953	-	ENSSSCT00000011078	ENSSSCG00000010117	--	--	54548900	54549867	+	-968	antisense
chr14	LNC_000864	XLOC_050787	--	Novel_lncRNA	54544630	54552953	-	ENSSSCT00000011077	ENSSSCG00000010116	SLC25A1	solute carrier family 25 (mitochondrial carrier; citrate transporter), member 1 [Source:HGNC Symbol;Acc:HGNC:10979]	54541564	54544455	-	174	upstream
chr1	ALDBSSCT0000000319	ALDBSSCG0000000186	--	Annotated_lncRNA	155395789	155403534	+	ENSSSCT00000005323	ENSSSCG00000004821	ASB7	ankyrin repeat and SOCS box containing 7 [Source:HGNC Symbol;Acc:HGNC:17182]	155405691	155444614	+	2156	upstream
chr14	LNC_000867	XLOC_051042	--	Novel_lncRNA	65843660	65845440	-	ENSSSCT00000011162	ENSSSCG00000010196	--	--	65796609	65894063	+	-1781	antisense
chr14	LNC_000867	XLOC_051042	--	Novel_lncRNA	65843660	65845440	-	ENSSSCT00000027466	ENSSSCG00000023596	--	--	65830734	65846117	-	-1781	sense_overlapping
chr13	LNC_000730	XLOC_043038	--	Novel_lncRNA	23766969	23777217	-	ENSSSCT00000032516	ENSSSCG00000027738	LRRFIP2	LRR binding FLII interacting protein 2 [Source:HGNC Symbol;Acc:HGNC:6703]	23693327	23766755	-	213	upstream
chr13	LNC_000730	XLOC_043038	--	Novel_lncRNA	23766969	23777217	-	ENSSSCT00000030165	ENSSSCG00000027738	LRRFIP2	LRR binding FLII interacting protein 2 [Source:HGNC Symbol;Acc:HGNC:6703]	23693327	23766755	-	213	upstream
chr13	LNC_000730	XLOC_043038	--	Novel_lncRNA	23766969	23777217	-	ENSSSCT00000032126	ENSSSCG00000030247	EPM2AIP1	EPM2A interacting protein 1 [Source:HGNC Symbol;Acc:HGNC:19735]	23780210	23782036	-	2992	downstream
chr13	LNC_000731	XLOC_043122	--	Novel_lncRNA	27667363	27672287	-	ENSSSCT00000012342	ENSSSCG00000011274	CTNNB1	catenin beta 1 [Source:HGNC Symbol;Acc:HGNC:2514]	27623128	27667302	+	60	downstream
chr13	LNC_000733	XLOC_043162	--	Novel_lncRNA	28774261	28778903	-	ENSSSCT00000031101	ENSSSCG00000027711	SS18L2	SS18 like 2 [Source:HGNC Symbol;Acc:HGNC:15593]	28775704	28779850	+	-3200	antisense
chr13	LNC_000733	XLOC_043162	--	Novel_lncRNA	28774261	28778903	-	ENSSSCT00000012352	ENSSSCG00000011282	SEC22C	SEC22 homolog C, vesicle trafficking protein [Source:HGNC Symbol;Acc:HGNC:16828]	28754404	28773963	-	297	upstream
chr13	LNC_000734	XLOC_043185	--	Novel_lncRNA	29342374	29344550	-	ENSSSCT00000012365	ENSSSCG00000011295	SNRK	SNF related kinase [Source:HGNC Symbol;Acc:HGNC:30598]	29344740	29398346	+	189	upstream
chr13	LNC_000735	XLOC_043259	--	Novel_lncRNA	31966287	31974082	-	ENSSSCT00000027362	ENSSSCG00000028917	--	--	31954470	31963869	+	2417	downstream
chr13	LNC_000735	XLOC_043259	--	Novel_lncRNA	31966287	31974082	-	ENSSSCT00000006292	ENSSSCG00000005722	--	--	31977275	32004110	-	3192	downstream
chr13	LNC_000736	XLOC_043280	--	Novel_lncRNA	32196531	32198756	-	ENSSSCT00000012390	ENSSSCG00000011317	FYCO1	FYVE and coiled-coil domain-containing protein 1 [Source:RefSeq peptide;Acc:NP_001121949]	32200269	32239205	-	1512	downstream
chr13	LNC_000736	XLOC_043280	--	Novel_lncRNA	32196531	32198756	-	ENSSSCT00000012393	ENSSSCG00000011318	CXCR6	chemokine (C-X-C motif) receptor 6 [Source:HGNC Symbol;Acc:HGNC:16647]	32192310	32197076	+	-546	antisense
chr13	LNC_000736	XLOC_043280	--	Novel_lncRNA	32196531	32198756	-	ENSSSCT00000035018	ENSSSCG00000011317	FYCO1	FYVE and coiled-coil domain-containing protein 1 [Source:RefSeq peptide;Acc:NP_001121949]	32166988	32203455	-	-2226	sense_overlapping
chr13	LNC_000737	XLOC_043455	--	Novel_lncRNA	37411653	37415790	-	ENSSSCT00000012509	ENSSSCG00000011429	--	--	37422409	37423990	+	6618	upstream
chr13	LNC_000737	XLOC_043455	--	Novel_lncRNA	37411653	37415790	-	ENSSSCT00000012510	ENSSSCG00000011430	DUSP7	dual specificity phosphatase 7 [Source:HGNC Symbol;Acc:HGNC:3073]	37397828	37403141	-	8511	upstream
chr13	LNC_000738	XLOC_043500	--	Novel_lncRNA	38014272	38020551	-	ENSSSCT00000029054	ENSSSCG00000011448	GLT8D1	glycosyltransferase 8 domain containing 1 [Source:HGNC Symbol;Acc:HGNC:24870]	38028635	38036078	-	8083	downstream
chr13	LNC_000738	XLOC_043500	--	Novel_lncRNA	38014272	38020551	-	ENSSSCT00000012529	ENSSSCG00000011449	GNL3	G protein nucleolar 3 [Source:HGNC Symbol;Acc:HGNC:29931]	38020617	38028557	+	65	upstream
chr13	LNC_000738	XLOC_043500	--	Novel_lncRNA	38014272	38020551	-	ENSSSCT00000012528	ENSSSCG00000011448	GLT8D1	glycosyltransferase 8 domain containing 1 [Source:HGNC Symbol;Acc:HGNC:24870]	38028635	38034838	-	8083	downstream
chr13	LNC_000739	XLOC_043500	--	Novel_lncRNA	38014272	38020553	-	ENSSSCT00000029054	ENSSSCG00000011448	GLT8D1	glycosyltransferase 8 domain containing 1 [Source:HGNC Symbol;Acc:HGNC:24870]	38028635	38036078	-	8081	downstream
chr13	LNC_000739	XLOC_043500	--	Novel_lncRNA	38014272	38020553	-	ENSSSCT00000012529	ENSSSCG00000011449	GNL3	G protein nucleolar 3 [Source:HGNC Symbol;Acc:HGNC:29931]	38020617	38028557	+	63	upstream
chr13	LNC_000739	XLOC_043500	--	Novel_lncRNA	38014272	38020553	-	ENSSSCT00000012528	ENSSSCG00000011448	GLT8D1	glycosyltransferase 8 domain containing 1 [Source:HGNC Symbol;Acc:HGNC:24870]	38028635	38034838	-	8081	downstream
chr9	ALDBSSCT0000011598	ALDBSSCG0000007041	--	Annotated_lncRNA	80812922	80818307	-	ENSSSCT00000016698	ENSSSCG00000015325	BET1	Bet1 golgi vesicular membrane trafficking protein [Source:HGNC Symbol;Acc:HGNC:14562]	80823453	80833936	-	5145	downstream
chr7	LNC_001761	XLOC_104217	--	Novel_lncRNA	42502862	42505590	-	ENSSSCT00000034619	ENSSSCG00000026752	CCND3	cyclin D3 [Source:HGNC Symbol;Acc:HGNC:1585]	42493149	42493376	-	9485	upstream
chr7	LNC_001761	XLOC_104217	--	Novel_lncRNA	42502862	42505590	-	ENSSSCT00000031143	ENSSSCG00000026752	CCND3	cyclin D3 [Source:HGNC Symbol;Acc:HGNC:1585]	42486007	42493235	-	9626	upstream
chr4	LNC_001487	XLOC_087525	--	Novel_lncRNA	134479610	134484049	-	ENSSSCT00000027504	ENSSSCG00000022447	F3	coagulation factor III, tissue factor [Source:HGNC Symbol;Acc:HGNC:3541]	134474325	134479725	+	-116	antisense
chr4	LNC_001487	XLOC_087525	--	Novel_lncRNA	134479610	134484049	-	ENSSSCT00000032329	ENSSSCG00000028620	ABCD3	ATP-binding cassette sub-family D member 3 [Source:RefSeq peptide;Acc:NP_001231062]	134489857	134572224	-	5807	downstream
chr4	LNC_001486	XLOC_087516	--	Novel_lncRNA	134275265	134277974	-	ENSSSCT00000007541	ENSSSCG00000006887	CNN3	calponin 3 [Source:HGNC Symbol;Acc:HGNC:2157]	134245518	134269264	-	6000	upstream
chr4	ALDBSSCT0000008048	ALDBSSCG0000004884	--	Annotated_lncRNA	98841904	98842356	-	ENSSSCT00000022301	ENSSSCG00000006398	SLAMF8	SLAM family member 8 [Source:HGNC Symbol;Acc:HGNC:21391]	98823544	98833669	-	8234	upstream
chr4	ALDBSSCT0000008048	ALDBSSCG0000004884	--	Annotated_lncRNA	98841904	98842356	-	ENSSSCT00000035784	ENSSSCG00000006398	SLAMF8	SLAM family member 8 [Source:HGNC Symbol;Acc:HGNC:21391]	98823544	98834109	-	7794	upstream
chr4	ALDBSSCT0000008048	ALDBSSCG0000004884	--	Annotated_lncRNA	98841904	98842356	-	ENSSSCT00000007011	ENSSSCG00000006398	SLAMF8	SLAM family member 8 [Source:HGNC Symbol;Acc:HGNC:21391]	98823544	98833669	-	8234	upstream
chr4	LNC_001480	XLOC_087104	--	Novel_lncRNA	116690322	116703092	-	ENSSSCT00000007406	ENSSSCG00000006760	HIPK1	homeodomain interacting protein kinase 1 [Source:HGNC Symbol;Acc:HGNC:19006]	116708892	116821627	-	5799	downstream
chr4	LNC_001480	XLOC_087104	--	Novel_lncRNA	116690322	116703092	-	ENSSSCT00000007404	ENSSSCG00000006759	OLFML3	olfactomedin like 3 [Source:HGNC Symbol;Acc:HGNC:24956]	116704502	116707235	-	1409	downstream
chr4	LNC_001480	XLOC_087104	--	Novel_lncRNA	116690322	116703092	-	ENSSSCT00000007405	ENSSSCG00000006760	HIPK1	homeodomain interacting protein kinase 1 [Source:HGNC Symbol;Acc:HGNC:19006]	116708892	116821627	-	5799	downstream
chr4	LNC_001482	XLOC_087201	--	Novel_lncRNA	121284994	121289508	-	ENSSSCT00000007482	ENSSSCG00000006831	SORT1	sortilin 1 [Source:HGNC Symbol;Acc:HGNC:11186]	121229989	121289559	+	-4515	antisense
chr4	LNC_001482	XLOC_087201	--	Novel_lncRNA	121284994	121289508	-	ENSSSCT00000007483	ENSSSCG00000006832	PSRC1	proline and serine rich coiled-coil 1 [Source:HGNC Symbol;Acc:HGNC:24472]	121297758	121301374	-	8249	downstream
chr8	ALDBSSCT0000010434	ALDBSSCG0000006339	--	Annotated_lncRNA	30782247	30784949	+	ENSSSCT00000029618	ENSSSCG00000027836	--	--	30793179	30793670	+	8229	upstream
chr4	LNC_001489	XLOC_087641	--	Novel_lncRNA	139634579	139639374	-	ENSSSCT00000034978	ENSSSCG00000006923	GBP2	-	139620866	139633483	-	1095	upstream
chr4	LNC_001489	XLOC_087641	--	Novel_lncRNA	139634579	139639374	-	ENSSSCT00000007583	ENSSSCG00000006923	GBP2	-	139612347	139633862	-	716	upstream
chr4	LNC_001489	XLOC_087641	--	Novel_lncRNA	139634579	139639374	-	ENSSSCT00000032794	ENSSSCG00000006923	GBP2	-	139612353	139633853	-	725	upstream
chr4	LNC_001488	XLOC_087590	--	Novel_lncRNA	138664612	138671502	-	ENSSSCT00000007573	ENSSSCG00000024047	--	--	138672479	138675055	-	976	downstream
chr5	ALDBSSCT0000008590	ALDBSSCG0000005230	--	Annotated_lncRNA	65507103	65513006	-	ENSSSCT00000000721	ENSSSCG00000000665	--	--	65517873	65546224	-	4866	downstream
chr5	ALDBSSCT0000008591	ALDBSSCG0000005230	--	Annotated_lncRNA	65507103	65513006	-	ENSSSCT00000000721	ENSSSCG00000000665	--	--	65517873	65546224	-	4866	downstream
chr14	ALDBSSCT0000003596	ALDBSSCG0000002150	--	Annotated_lncRNA	51094919	51106707	+	ENSSSCT00000010981	ENSSSCG00000010024	RNF185	ring finger protein 185 [Source:HGNC Symbol;Acc:HGNC:26783]	51057234	51088417	+	6501	downstream
chr14	ALDBSSCT0000003595	ALDBSSCG0000002149	--	Annotated_lncRNA	49759489	49760671	+	ENSSSCT00000010943	ENSSSCG00000028707	--	--	49688038	49758063	+	1425	downstream
chr3	ALDBSSCT0000007041	ALDBSSCG0000004285	--	Annotated_lncRNA	18344084	18353941	-	ENSSSCT00000008548	ENSSSCG00000007800	SEPT1	septin 1 [Source:HGNC Symbol;Acc:HGNC:2879]	18363271	18376614	+	9329	upstream
chr3	ALDBSSCT0000007041	ALDBSSCG0000004285	--	Annotated_lncRNA	18344084	18353941	-	ENSSSCT00000008549	ENSSSCG00000007801	--	--	18359591	18363848	-	5649	downstream
chr3	ALDBSSCT0000007043	ALDBSSCG0000004285	--	Annotated_lncRNA	18344308	18354020	-	ENSSSCT00000008548	ENSSSCG00000007800	SEPT1	septin 1 [Source:HGNC Symbol;Acc:HGNC:2879]	18363271	18376614	+	9250	upstream
chr3	ALDBSSCT0000007043	ALDBSSCG0000004285	--	Annotated_lncRNA	18344308	18354020	-	ENSSSCT00000008549	ENSSSCG00000007801	--	--	18359591	18363848	-	5570	downstream
chr3	ALDBSSCT0000007042	ALDBSSCG0000004285	--	Annotated_lncRNA	18344084	18354275	-	ENSSSCT00000008548	ENSSSCG00000007800	SEPT1	septin 1 [Source:HGNC Symbol;Acc:HGNC:2879]	18363271	18376614	+	8995	upstream
chr3	ALDBSSCT0000007042	ALDBSSCG0000004285	--	Annotated_lncRNA	18344084	18354275	-	ENSSSCT00000008549	ENSSSCG00000007801	--	--	18359591	18363848	-	5315	downstream
chrX	ALDBSSCT0000011949	ALDBSSCG0000007271	--	Annotated_lncRNA	78275467	78279263	+	ENSSSCT00000030722	ENSSSCG00000024291	APOOL	apolipoprotein O like [Source:HGNC Symbol;Acc:HGNC:24009]	78284663	78301669	+	5399	upstream
chrX	ALDBSSCT0000011949	ALDBSSCG0000007271	--	Annotated_lncRNA	78275467	78279263	+	ENSSSCT00000025018	ENSSSCG00000024291	APOOL	apolipoprotein O like [Source:HGNC Symbol;Acc:HGNC:24009]	78284663	78301669	+	5399	upstream
chr14	ALDBSSCT0000003598	ALDBSSCG0000002151	--	Annotated_lncRNA	51169675	51172619	+	ENSSSCT00000010983	ENSSSCG00000010026	PIK3IP1	phosphoinositide-3-kinase interacting protein 1 [Source:HGNC Symbol;Acc:HGNC:24942]	51151822	51162385	-	7289	upstream
chr14	ALDBSSCT0000003755	ALDBSSCG0000002251	--	Annotated_lncRNA	132676263	132955044	+	ENSSSCT00000011626	ENSSSCG00000010630	--	--	132674582	132675160	-	1102	upstream
chr14	ALDBSSCT0000003754	ALDBSSCG0000002250	--	Annotated_lncRNA	132405827	132406780	+	ENSSSCT00000011625	ENSSSCG00000010629	ADRA2A	Alpha-2A adrenergic receptor [Source:UniProtKB/Swiss-Prot;Acc:P18871]	132403894	132405246	+	580	downstream
chr12	LNC_000603	XLOC_036549	--	Novel_lncRNA	62367237	62377169	+	ENSSSCT00000019630	ENSSSCG00000018035	PIGL	phosphatidylinositol glycan anchor biosynthesis class L [Source:HGNC Symbol;Acc:HGNC:8966]	62343359	62381926	-	-9933	antisense
chr12	LNC_000603	XLOC_036549	--	Novel_lncRNA	62367237	62377169	+	ENSSSCT00000019634	ENSSSCG00000018039	NCOR1	nuclear receptor corepressor 1 [Source:HGNC Symbol;Acc:HGNC:7672]	62387143	62538681	-	9973	downstream
chr7	LNC_001771	XLOC_104928	--	Novel_lncRNA	72242064	72250928	-	ENSSSCT00000002199	ENSSSCG00000001966	--	--	72211400	72237346	-	4717	upstream
chr12	LNC_000608	XLOC_036882	--	Novel_lncRNA	15040701	15044236	-	ENSSSCT00000018815	ENSSSCG00000017283	CD79B	CD79b molecule [Source:HGNC Symbol;Acc:HGNC:1699]	15044352	15047832	+	115	upstream
chr12	LNC_000608	XLOC_036882	--	Novel_lncRNA	15040701	15044236	-	ENSSSCT00000018814	ENSSSCG00000017282	SCN4A	sodium voltage-gated channel alpha subunit 4 [Source:HGNC Symbol;Acc:HGNC:10591]	15008606	15037441	+	3259	downstream
chr12	LNC_000608	XLOC_036882	--	Novel_lncRNA	15040701	15044236	-	ENSSSCT00000035489	ENSSSCG00000017283	CD79B	CD79b molecule [Source:HGNC Symbol;Acc:HGNC:1699]	15044374	15047831	+	137	upstream
chr12	LNC_000608	XLOC_036882	--	Novel_lncRNA	15040701	15044236	-	ENSSSCT00000036549	ENSSSCG00000017283	CD79B	CD79b molecule [Source:HGNC Symbol;Acc:HGNC:1699]	15044374	15047831	+	137	upstream
chr12	LNC_000609	XLOC_036886	--	Novel_lncRNA	15175471	15181563	-	ENSSSCT00000030857	ENSSSCG00000028698	CCDC47	coiled-coil domain containing 47 [Source:HGNC Symbol;Acc:HGNC:24856]	15155060	15174686	+	784	downstream
chr9	ALDBSSCT0000011481	ALDBSSCG0000006989	--	Annotated_lncRNA	40835708	40837689	-	ENSSSCT00000028051	ENSSSCG00000025606	--	--	40746503	40833540	-	2167	upstream
chr9	ENSSSCT00000035961	ENSSSCG00000031026	CH242-369P7.3	Annotated_lncRNA	73760584	73761409	+	ENSSSCT00000017049	ENSSSCG00000015652	IL10	interleukin 10 [Source:HGNC Symbol;Acc:HGNC:5962]	73757704	73762351	-	-826	antisense
chr6	ALDBSSCT0000009589	ALDBSSCG0000005853	--	Annotated_lncRNA	156127743	156131644	-	ENSSSCT00000023375	ENSSSCG00000021745	ERMAP	erythroblast membrane associated protein (Scianna blood group) [Source:HGNC Symbol;Acc:HGNC:15743]	156023328	156120994	-	6748	upstream
chr2	ALDBSSCT0000005826	ALDBSSCG0000003544	--	Annotated_lncRNA	18918687	18924186	+	ENSSSCT00000014501	ENSSSCG00000013277	--	--	18926231	18929894	-	2044	downstream
chr2	ALDBSSCT0000005826	ALDBSSCG0000003544	--	Annotated_lncRNA	18918687	18924186	+	ENSSSCT00000030582	ENSSSCG00000013277	--	--	18927604	18941123	-	3417	downstream
chr6	ALDBSSCT0000008822	ALDBSSCG0000005388	--	Annotated_lncRNA	42424227	42509981	+	ENSSSCT00000029489	ENSSSCG00000023833	--	--	42411511	42418080	-	6146	upstream
chr6	ALDBSSCT0000008820	ALDBSSCG0000005387	--	Annotated_lncRNA	41805551	41828609	+	ENSSSCT00000003257	ENSSSCG00000029420	--	--	41833561	41840293	-	4951	downstream
chr6	ALDBSSCT0000008821	ALDBSSCG0000005388	--	Annotated_lncRNA	42424227	42509981	+	ENSSSCT00000029489	ENSSSCG00000023833	--	--	42411511	42418080	-	6146	upstream
chr11	LNC_000519	XLOC_031659	--	Novel_lncRNA	21445399	21454302	+	ENSSSCT00000010311	ENSSSCG00000009410	--	--	21427647	21445316	+	82	downstream
chrX	ALDBSSCT0000012044	ALDBSSCG0000007342	--	Annotated_lncRNA	71485982	71505727	-	ENSSSCT00000013608	ENSSSCG00000012443	CYSLTR1	cysteinyl leukotriene receptor 1 [Source:HGNC Symbol;Acc:HGNC:17451]	71481819	71482841	-	3140	upstream
chr4	LNC_001481	XLOC_087104	--	Novel_lncRNA	116690322	116703092	-	ENSSSCT00000007406	ENSSSCG00000006760	HIPK1	homeodomain interacting protein kinase 1 [Source:HGNC Symbol;Acc:HGNC:19006]	116708892	116821627	-	5799	downstream
chr4	LNC_001481	XLOC_087104	--	Novel_lncRNA	116690322	116703092	-	ENSSSCT00000007404	ENSSSCG00000006759	OLFML3	olfactomedin like 3 [Source:HGNC Symbol;Acc:HGNC:24956]	116704502	116707235	-	1409	downstream
chr4	LNC_001481	XLOC_087104	--	Novel_lncRNA	116690322	116703092	-	ENSSSCT00000007405	ENSSSCG00000006760	HIPK1	homeodomain interacting protein kinase 1 [Source:HGNC Symbol;Acc:HGNC:19006]	116708892	116821627	-	5799	downstream
chr11	LNC_000514	XLOC_031466	--	Novel_lncRNA	15688556	15738087	+	ENSSSCT00000010269	ENSSSCG00000009372	MRPS31	mitochondrial ribosomal protein S31 [Source:HGNC Symbol;Acc:HGNC:16632]	15738167	15775714	-	79	downstream
chr11	LNC_000514	XLOC_031466	--	Novel_lncRNA	15688556	15738087	+	ENSSSCT00000010267	ENSSSCG00000009370	FOXO1	forkhead box O1 [Source:HGNC Symbol;Acc:HGNC:3819]	15544860	15688360	-	195	upstream
chr11	LNC_000515	XLOC_031466	--	Novel_lncRNA	15688624	15709040	+	ENSSSCT00000010267	ENSSSCG00000009370	FOXO1	forkhead box O1 [Source:HGNC Symbol;Acc:HGNC:3819]	15544860	15688360	-	263	upstream
chr11	LNC_000516	XLOC_031466	--	Novel_lncRNA	15704807	15738087	+	ENSSSCT00000010269	ENSSSCG00000009372	MRPS31	mitochondrial ribosomal protein S31 [Source:HGNC Symbol;Acc:HGNC:16632]	15738167	15775714	-	79	downstream
chr11	LNC_000517	XLOC_031590	--	Novel_lncRNA	18923362	18937424	+	ENSSSCT00000023584	ENSSSCG00000022623	CDADC1	cytidine and dCMP deaminase domain containing 1 [Source:HGNC Symbol;Acc:HGNC:20299]	18866090	18916064	-	7297	upstream
chr11	LNC_000517	XLOC_031590	--	Novel_lncRNA	18923362	18937424	+	ENSSSCT00000031653	ENSSSCG00000022064	MLNR	motilin receptor [Source:HGNC Symbol;Acc:HGNC:4495]	18939616	18941688	-	2191	downstream
chr15	ALDBSSCT0000004462	ALDBSSCG0000002719	--	Annotated_lncRNA	61704909	61705466	-	ENSSSCT00000017250	ENSSSCG00000015842	PPP2CB	protein phosphatase 2 catalytic subunit beta [Source:HGNC Symbol;Acc:HGNC:9300]	61682022	61697561	+	7347	downstream
chr15	ALDBSSCT0000004462	ALDBSSCG0000002719	--	Annotated_lncRNA	61704909	61705466	-	ENSSSCT00000017251	ENSSSCG00000015843	UBXN8	UBX domain protein 8 [Source:HGNC Symbol;Acc:HGNC:30307]	61713435	61739535	-	7968	downstream
chr15	ALDBSSCT0000004465	ALDBSSCG0000002721	--	Annotated_lncRNA	62238821	62245865	-	ENSSSCT00000017255	ENSSSCG00000015847	MBOAT4	-	62252432	62261192	+	6566	upstream
chr16	LNC_001029	XLOC_061452	--	Novel_lncRNA	47874323	47885476	-	ENSSSCT00000035098	ENSSSCG00000016954	ERBB2IP	-	47885606	47906821	-	129	downstream
chr16	LNC_001029	XLOC_061452	--	Novel_lncRNA	47874323	47885476	-	ENSSSCT00000018462	ENSSSCG00000016954	ERBB2IP	-	47885606	47906898	-	129	downstream
chr15	ALDBSSCT0000004662	ALDBSSCG0000002839	--	Annotated_lncRNA	154709057	154709934	-	ENSSSCT00000017825	ENSSSCG00000016370	SEPT2	septin 2 [Source:HGNC Symbol;Acc:HGNC:7729]	154711219	154738280	+	1284	upstream
chr12	ALDBSSCT0000002407	ALDBSSCG0000001457	--	Annotated_lncRNA	24007745	24010073	-	ENSSSCT00000026445	ENSSSCG00000024743	PRR15L	proline rich 15 like [Source:HGNC Symbol;Acc:HGNC:28149]	24003235	24003537	-	4207	upstream
chr17	ALDBSSCT0000005353	ALDBSSCG0000003239	--	Annotated_lncRNA	46027165	46035591	-	ENSSSCT00000035323	ENSSSCG00000007336	NNAT	neuronatin [Source:HGNC Symbol;Acc:HGNC:7860]	46043515	46045923	+	7923	upstream
chr17	ALDBSSCT0000005353	ALDBSSCG0000003239	--	Annotated_lncRNA	46027165	46035591	-	ENSSSCT00000034929	ENSSSCG00000030835	BLCAP	bladder cancer associated protein [Source:HGNC Symbol;Acc:HGNC:1055]	46039731	46049992	-	4139	downstream
chr17	ALDBSSCT0000005353	ALDBSSCG0000003239	--	Annotated_lncRNA	46027165	46035591	-	ENSSSCT00000008027	ENSSSCG00000007336	NNAT	neuronatin [Source:HGNC Symbol;Acc:HGNC:7860]	46043515	46045923	+	7923	upstream
chr17	ALDBSSCT0000005353	ALDBSSCG0000003239	--	Annotated_lncRNA	46027165	46035591	-	ENSSSCT00000034773	ENSSSCG00000007336	NNAT	neuronatin [Source:HGNC Symbol;Acc:HGNC:7860]	46043303	46045923	+	7711	upstream
chr17	ALDBSSCT0000005352	ALDBSSCG0000003239	--	Annotated_lncRNA	46025610	46030777	-	ENSSSCT00000034929	ENSSSCG00000030835	BLCAP	bladder cancer associated protein [Source:HGNC Symbol;Acc:HGNC:1055]	46039731	46049992	-	8953	downstream
chr18	LNC_001129	XLOC_067812	--	Novel_lncRNA	53897235	53900922	-	ENSSSCT00000018206	ENSSSCG00000016725	TNS3	tensin 3 [Source:HGNC Symbol;Acc:HGNC:21616]	53694289	53887545	+	9689	downstream
chr18	LNC_001126	XLOC_067717	--	Novel_lncRNA	48092094	48131169	-	ENSSSCT00000018170	ENSSSCG00000016689	TRIL	TLR4 interactor with leucine rich repeats [Source:HGNC Symbol;Acc:HGNC:22200]	48131854	48134283	+	684	upstream
chr18	LNC_001127	XLOC_067756	--	Novel_lncRNA	50073881	50076421	-	ENSSSCT00000018184	ENSSSCG00000016703	HOXA5	homeobox A5 [Source:HGNC Symbol;Acc:HGNC:5106]	50062880	50065910	+	7970	downstream
chr18	LNC_001127	XLOC_067756	--	Novel_lncRNA	50073881	50076421	-	ENSSSCT00000018185	ENSSSCG00000016704	HOXA4	homeobox A4 [Source:HGNC Symbol;Acc:HGNC:5105]	50076596	50078137	+	174	upstream
chr18	LNC_001124	XLOC_067655	--	Novel_lncRNA	46927764	46954406	-	ENSSSCT00000018159	ENSSSCG00000016678	NOD1	nucleotide binding oligomerization domain containing 1 [Source:HGNC Symbol;Acc:HGNC:16390]	46956599	47012335	+	2192	upstream
chr18	LNC_001124	XLOC_067655	--	Novel_lncRNA	46927764	46954406	-	ENSSSCT00000033324	ENSSSCG00000016678	NOD1	nucleotide binding oligomerization domain containing 1 [Source:HGNC Symbol;Acc:HGNC:16390]	46956890	47012192	+	2483	upstream
chr18	LNC_001122	XLOC_067538	--	Novel_lncRNA	41423854	41430685	-	ENSSSCT00000018137	ENSSSCG00000016659	--	--	41381362	41416004	+	7849	downstream
chr18	LNC_001123	XLOC_067538	--	Novel_lncRNA	41423854	41430685	-	ENSSSCT00000018137	ENSSSCG00000016659	--	--	41381362	41416004	+	7849	downstream
chr18	LNC_001120	XLOC_067280	--	Novel_lncRNA	31004112	31036817	-	ENSSSCT00000018105	ENSSSCG00000016629	--	--	31038663	31232616	-	1845	downstream
chr10	LNC_000469	XLOC_029190	--	Novel_lncRNA	75603635	75618463	+	ENSSSCT00000025266	ENSSSCG00000027363	--	--	75598419	75601440	-	2194	upstream
chr10	LNC_000464	XLOC_028838	--	Novel_lncRNA	63265068	63265949	+	ENSSSCT00000012151	ENSSSCG00000011104	CUL2	cullin 2 [Source:HGNC Symbol;Acc:HGNC:2552]	63270452	63303596	+	4502	upstream
chr2	ALDBSSCT0000006318	ALDBSSCG0000003863	--	Annotated_lncRNA	70560563	70580110	-	ENSSSCT00000014868	ENSSSCG00000013613	ELOF1	elongation factor 1 homolog [Source:HGNC Symbol;Acc:HGNC:28691]	70546984	70553132	-	7430	upstream
chr2	ALDBSSCT0000006313	ALDBSSCG0000003858	--	Annotated_lncRNA	66208018	66209782	-	ENSSSCT00000015027	ENSSSCG00000013753	IER2	immediate early response 2 [Source:HGNC Symbol;Acc:HGNC:28871]	66211129	66211794	-	1346	downstream
chr2	ALDBSSCT0000006313	ALDBSSCG0000003858	--	Annotated_lncRNA	66208018	66209782	-	ENSSSCT00000015026	ENSSSCG00000013752	STX10	syntaxin 10 [Source:HGNC Symbol;Acc:HGNC:11428]	66214636	66217782	+	4853	upstream
chrX	ENSSSCT00000034949	ENSSSCG00000031021	CH242-81B3.2	Annotated_lncRNA	38605879	38612241	-	ENSSSCT00000013384	ENSSSCG00000012238	TSPAN7	tetraspanin 7 [Source:HGNC Symbol;Acc:HGNC:11854]	38598909	38624148	+	-6363	antisense
chrX	ENSSSCT00000034949	ENSSSCG00000031021	CH242-81B3.2	Annotated_lncRNA	38605879	38612241	-	ENSSSCT00000033728	ENSSSCG00000012238	TSPAN7	tetraspanin 7 [Source:HGNC Symbol;Acc:HGNC:11854]	38609254	38623239	+	-2988	antisense
chrX	ENSSSCT00000034949	ENSSSCG00000031021	CH242-81B3.2	Annotated_lncRNA	38605879	38612241	-	ENSSSCT00000033070	ENSSSCG00000012238	TSPAN7	tetraspanin 7 [Source:HGNC Symbol;Acc:HGNC:11854]	38434798	38624145	+	-6363	antisense
chrX	ENSSSCT00000034949	ENSSSCG00000031021	CH242-81B3.2	Annotated_lncRNA	38605879	38612241	-	ENSSSCT00000036230	ENSSSCG00000012238	TSPAN7	tetraspanin 7 [Source:HGNC Symbol;Acc:HGNC:11854]	38434898	38615176	+	-6363	antisense
chr9	ENSSSCT00000019996	ENSSSCG00000018401	7SK	Annotated_lncRNA	108187102	108187423	+	ENSSSCT00000016777	ENSSSCG00000015402	CACNA2D1	calcium voltage-gated channel auxiliary subunit alpha2delta 1 [Source:HGNC Symbol;Acc:HGNC:1399]	108068516	108551541	+	-322	sense_overlapping
chr1	ALDBSSCT0000001056	ALDBSSCG0000000651	--	Annotated_lncRNA	293507083	293508684	-	ENSSSCT00000006067	ENSSSCG00000005516	STOM	stomatin [Source:HGNC Symbol;Acc:HGNC:3383]	293510864	293528679	-	2179	downstream
chr1	ALDBSSCT0000001056	ALDBSSCG0000000651	--	Annotated_lncRNA	293507083	293508684	-	ENSSSCT00000006064	ENSSSCG00000005514	RAB14	RAB14, member RAS oncogene family [Source:HGNC Symbol;Acc:HGNC:16524]	293477531	293504330	+	2752	downstream
chr6	ALDBSSCT0000009323	ALDBSSCG0000005685	--	Annotated_lncRNA	46525874	46534549	-	ENSSSCT00000003408	ENSSSCG00000003071	ZNF404	zinc finger protein 404 [Source:HGNC Symbol;Acc:HGNC:19417]	46511270	46517962	-	7911	upstream
chr16	ALDBSSCT0000004808	ALDBSSCG0000002922	--	Annotated_lncRNA	54804285	54810740	+	ENSSSCT00000018491	ENSSSCG00000016981	CPEB4	cytoplasmic polyadenylation element binding protein 4 [Source:HGNC Symbol;Acc:HGNC:21747]	54813538	54876701	-	2797	downstream
chr17	ENSSSCT00000036055	ENSSSCG00000007280	ITCH	Annotated_lncRNA	43030475	43114390	+	ENSSSCT00000007964	ENSSSCG00000007279	DYNLRB1	dynein light chain roadblock-type 1 [Source:HGNC Symbol;Acc:HGNC:15468]	43121869	43139869	+	7478	upstream
chr16	ALDBSSCT0000004806	ALDBSSCG0000002922	--	Annotated_lncRNA	54803904	54810740	+	ENSSSCT00000018491	ENSSSCG00000016981	CPEB4	cytoplasmic polyadenylation element binding protein 4 [Source:HGNC Symbol;Acc:HGNC:21747]	54813538	54876701	-	2797	downstream
chr16	ALDBSSCT0000004807	ALDBSSCG0000002922	--	Annotated_lncRNA	54804200	54810740	+	ENSSSCT00000018491	ENSSSCG00000016981	CPEB4	cytoplasmic polyadenylation element binding protein 4 [Source:HGNC Symbol;Acc:HGNC:21747]	54813538	54876701	-	2797	downstream
chr16	ALDBSSCT0000004800	ALDBSSCG0000002918	--	Annotated_lncRNA	52742118	52746929	+	ENSSSCT00000018486	ENSSSCG00000016976	ZNF366	zinc finger protein 366 [Source:HGNC Symbol;Acc:HGNC:18316]	52692102	52734538	-	7579	upstream
chr2	LNC_001233	XLOC_073945	--	Novel_lncRNA	92393343	92433362	-	ENSSSCT00000024808	ENSSSCG00000025210	--	--	92433788	92590243	+	425	upstream
chr2	LNC_001230	XLOC_073879	--	Novel_lncRNA	88525954	88531514	-	ENSSSCT00000015403	ENSSSCG00000014101	--	--	88534984	88719629	-	3469	downstream
chr2	LNC_001231	XLOC_073931	--	Novel_lncRNA	91718510	91729935	-	ENSSSCT00000015434	ENSSSCG00000014130	--	--	91722721	91726111	+	-3391	antisense
chr2	LNC_001231	XLOC_073931	--	Novel_lncRNA	91718510	91729935	-	ENSSSCT00000015433	ENSSSCG00000014129	ZCCHC9	zinc finger, CCHC domain containing 9 [Source:HGNC Symbol;Acc:HGNC:25424]	91735398	91744477	-	5462	downstream
chr2	LNC_001234	XLOC_073945	--	Novel_lncRNA	92417004	92433425	-	ENSSSCT00000024808	ENSSSCG00000025210	--	--	92433788	92590243	+	362	upstream
chr2	ALDBSSCT0000006229	ALDBSSCG0000003805	--	Annotated_lncRNA	27627666	27631051	-	ENSSSCT00000014520	ENSSSCG00000013295	TRIM44	tripartite motif containing 44 [Source:HGNC Symbol;Acc:HGNC:19016]	27638088	27737927	-	7036	downstream
chr2	ALDBSSCT0000006229	ALDBSSCG0000003805	--	Annotated_lncRNA	27627666	27631051	-	ENSSSCT00000036541	ENSSSCG00000013295	TRIM44	tripartite motif containing 44 [Source:HGNC Symbol;Acc:HGNC:19016]	27638088	27737910	-	7036	downstream
chr10	ENSSSCT00000022108	ENSSSCG00000020513	7SK	Annotated_lncRNA	54832093	54832370	-	ENSSSCT00000012103	ENSSSCG00000011059	--	--	54800699	54904300	-	-278	sense_overlapping
chr3	ALDBSSCT0000007044	ALDBSSCG0000004285	--	Annotated_lncRNA	18344308	18354283	-	ENSSSCT00000008548	ENSSSCG00000007800	SEPT1	septin 1 [Source:HGNC Symbol;Acc:HGNC:2879]	18363271	18376614	+	8987	upstream
chr3	ALDBSSCT0000007044	ALDBSSCG0000004285	--	Annotated_lncRNA	18344308	18354283	-	ENSSSCT00000008549	ENSSSCG00000007801	--	--	18359591	18363848	-	5307	downstream
chr11	ALDBSSCT0000001947	ALDBSSCG0000001173	--	Annotated_lncRNA	18740623	18860403	-	ENSSSCT00000023584	ENSSSCG00000022623	CDADC1	cytidine and dCMP deaminase domain containing 1 [Source:HGNC Symbol;Acc:HGNC:20299]	18866090	18916064	-	5686	downstream
chr11	ALDBSSCT0000001944	ALDBSSCG0000001172	--	Annotated_lncRNA	18603509	18612838	-	ENSSSCT00000010294	ENSSSCG00000009395	SETDB2	SET domain bifurcated 2 [Source:HGNC Symbol;Acc:HGNC:20263]	18570454	18599086	-	4422	upstream
GL893425.2	LNC_000057	XLOC_003439	--	Novel_lncRNA	60572	61126	+	ENSSSCT00000022477	ENSSSCG00000025495	--	--	61657	71076	+	530	upstream
GL893348.1	LNC_000056	XLOC_003258	--	Novel_lncRNA	38343	40490	-	ENSSSCT00000030747	ENSSSCG00000021529	KLF11	Kruppel like factor 11 [Source:HGNC Symbol;Acc:HGNC:11811]	40706	48115	-	215	downstream
chr1	ALDBSSCT0000000631	ALDBSSCG0000000378	--	Annotated_lncRNA	9415368	9418090	-	ENSSSCT00000004478	ENSSSCG00000004050	WTAP	Wilms tumor 1 associated protein [Source:HGNC Symbol;Acc:HGNC:16846]	9420559	9447336	-	2468	downstream
chr1	ALDBSSCT0000000631	ALDBSSCG0000000378	--	Annotated_lncRNA	9415368	9418090	-	ENSSSCT00000004477	ENSSSCG00000004049	ACAT2	acetyl-CoA acetyltransferase 2 [Source:HGNC Symbol;Acc:HGNC:94]	9399577	9411773	-	3594	upstream
chr2	ALDBSSCT0000006136	ALDBSSCG0000003750	--	Annotated_lncRNA	3570506	3575321	-	ENSSSCT00000014101	ENSSSCG00000026349	--	--	3563353	3568662	+	1843	downstream
chr1	LNC_000292	XLOC_016850	--	Novel_lncRNA	18187896	18192296	+	ENSSSCT00000004531	ENSSSCG00000004098	--	--	18199792	18201279	+	7495	upstream
chrX	ENSSSCT00000035565	ENSSSCG00000031017	CH242-6D10.1	Annotated_lncRNA	56024481	56034195	+	ENSSSCT00000025812	ENSSSCG00000024334	--	--	56034105	56054930	+	-91	sense_overlapping
chr8	LNC_001837	XLOC_108952	--	Novel_lncRNA	145098654	145103740	+	ENSSSCT00000031997	ENSSSCG00000026729	--	--	145103791	145136181	+	50	upstream
chr8	LNC_001830	XLOC_108599	--	Novel_lncRNA	127408132	127410834	+	ENSSSCT00000010037	ENSSSCG00000024306	UBE2D2	ubiquitin-conjugating enzyme E2 D2 [Source:RefSeq peptide;Acc:NP_001072141]	127420555	127432586	+	9720	upstream
chr8	LNC_001838	XLOC_109079	--	Novel_lncRNA	145837018	145840697	+	ENSSSCT00000026377	ENSSSCG00000029507	RASGEF1B	ras-GEF domain-containing family member 1B [Source:RefSeq peptide;Acc:NP_001182296]	145847327	145888793	+	6629	upstream
chr8	LNC_001839	XLOC_109099	--	Novel_lncRNA	146973621	146974345	+	ENSSSCT00000010136	ENSSSCG00000009256	ANTXR2	anthrax toxin receptor 2 [Source:HGNC Symbol;Acc:HGNC:21732]	146872576	146964111	+	9509	downstream
chr2	LNC_001217	XLOC_073335	--	Novel_lncRNA	66957649	66959151	-	ENSSSCT00000014987	ENSSSCG00000013719	--	--	66950440	66953196	+	4452	downstream
chr2	LNC_001217	XLOC_073335	--	Novel_lncRNA	66957649	66959151	-	ENSSSCT00000014990	ENSSSCG00000013719	--	--	66950440	66952610	+	5038	downstream
chr2	LNC_001217	XLOC_073335	--	Novel_lncRNA	66957649	66959151	-	ENSSSCT00000014993	ENSSSCG00000013719	--	--	66950206	66952718	+	4930	downstream
chr7	ALDBSSCT0000009687	ALDBSSCG0000005912	--	Annotated_lncRNA	27213595	27214274	+	ENSSSCT00000001518	ENSSSCG00000001394	MIC-2	-	27223010	27229254	-	8735	downstream
chr14	ALDBSSCT0000004104	ALDBSSCG0000002471	--	Annotated_lncRNA	146715593	146721855	-	ENSSSCT00000030699	ENSSSCG00000010742	UROS	uroporphyrinogen III synthase [Source:HGNC Symbol;Acc:HGNC:12592]	146730878	146760491	-	9022	downstream
chr14	ALDBSSCT0000004104	ALDBSSCG0000002471	--	Annotated_lncRNA	146715593	146721855	-	ENSSSCT00000011753	ENSSSCG00000010741	EDRF1	erythroid differentiation regulatory factor 1 [Source:HGNC Symbol;Acc:HGNC:24640]	146650251	146714946	+	646	downstream
chr14	ALDBSSCT0000004104	ALDBSSCG0000002471	--	Annotated_lncRNA	146715593	146721855	-	ENSSSCT00000011754	ENSSSCG00000010742	UROS	uroporphyrinogen III synthase [Source:HGNC Symbol;Acc:HGNC:12592]	146730878	146760491	-	9022	downstream
chr7	ALDBSSCT0000010172	ALDBSSCG0000006195	--	Annotated_lncRNA	60624571	60647062	-	ENSSSCT00000025851	ENSSSCG00000025594	--	--	60652494	60653132	+	5431	upstream
chr7	ALDBSSCT0000010172	ALDBSSCG0000006195	--	Annotated_lncRNA	60624571	60647062	-	ENSSSCT00000002083	ENSSSCG00000001858	CIB1	calcium and integrin binding 1 [Source:HGNC Symbol;Acc:HGNC:16920]	60655849	60659597	-	8786	downstream
chr7	ALDBSSCT0000010174	ALDBSSCG0000006197	--	Annotated_lncRNA	61955263	61956016	-	ENSSSCT00000002094	ENSSSCG00000001869	PEAK1	pseudopodium enriched atypical kinase 1 [Source:HGNC Symbol;Acc:HGNC:29431]	61961070	62180499	-	5053	downstream
chr12	LNC_000604	XLOC_036712	--	Novel_lncRNA	4818031	4820700	-	ENSSSCT00000018706	ENSSSCG00000017181	CYGB	cytoglobin [Source:HGNC Symbol;Acc:HGNC:16505]	4829969	4840020	+	9268	upstream
chr12	LNC_000604	XLOC_036712	--	Novel_lncRNA	4818031	4820700	-	ENSSSCT00000030698	ENSSSCG00000028604	PRCD	progressive rod-cone degeneration [Source:HGNC Symbol;Acc:HGNC:32528]	4825224	4827352	-	4523	downstream
chr13	ENSSSCT00000020410	ENSSSCG00000018815	7SK	Annotated_lncRNA	50162106	50162385	-	ENSSSCT00000012578	ENSSSCG00000011495	PRICKLE2	prickle planar cell polarity protein 2 [Source:HGNC Symbol;Acc:HGNC:20340]	50099800	50263925	-	-280	sense_overlapping
chr12	LNC_000605	XLOC_036741	--	Novel_lncRNA	6111361	6123103	-	ENSSSCT00000018738	ENSSSCG00000017213	HN1	hematological and neurological expressed 1 [Source:HGNC Symbol;Acc:HGNC:14569]	6101880	6120134	+	-8774	antisense
chr12	LNC_000605	XLOC_036741	--	Novel_lncRNA	6111361	6123103	-	ENSSSCT00000018739	ENSSSCG00000017214	ARMC7	armadillo repeat containing 7 [Source:HGNC Symbol;Acc:HGNC:26168]	6126601	6145548	-	3497	downstream
chr12	LNC_000605	XLOC_036741	--	Novel_lncRNA	6111361	6123103	-	ENSSSCT00000027165	ENSSSCG00000028210	NT5C	5', 3'-nucleotidase, cytosolic [Source:HGNC Symbol;Acc:HGNC:17144]	6124299	6128276	+	1195	upstream
chr12	LNC_000606	XLOC_036741	--	Novel_lncRNA	6111361	6124480	-	ENSSSCT00000018738	ENSSSCG00000017213	HN1	hematological and neurological expressed 1 [Source:HGNC Symbol;Acc:HGNC:14569]	6101880	6120134	+	-8774	antisense
chr12	LNC_000606	XLOC_036741	--	Novel_lncRNA	6111361	6124480	-	ENSSSCT00000018739	ENSSSCG00000017214	ARMC7	armadillo repeat containing 7 [Source:HGNC Symbol;Acc:HGNC:26168]	6126601	6145548	-	2120	downstream
chr12	LNC_000606	XLOC_036741	--	Novel_lncRNA	6111361	6124480	-	ENSSSCT00000027165	ENSSSCG00000028210	NT5C	5', 3'-nucleotidase, cytosolic [Source:HGNC Symbol;Acc:HGNC:17144]	6124299	6128276	+	-182	antisense
chr9	LNC_001900	XLOC_113275	--	Novel_lncRNA	36951110	36951765	+	ENSSSCT00000026024	ENSSSCG00000023589	--	--	36957941	36969067	+	6175	upstream
chr9	LNC_001901	XLOC_113367	--	Novel_lncRNA	39895444	39906886	+	ENSSSCT00000016363	ENSSSCG00000014999	KBTBD3	kelch repeat and BTB domain containing 3 [Source:HGNC Symbol;Acc:HGNC:22934]	39910815	39920566	-	3928	downstream
chr9	LNC_001902	XLOC_113370	--	Novel_lncRNA	39988072	40055517	+	ENSSSCT00000016362	ENSSSCG00000014998	AASDHPPT	aminoadipate-semialdehyde dehydrogenase-phosphopantetheinyl transferase [Source:HGNC Symbol;Acc:HGNC:14235]	39939906	39984846	+	3225	downstream
chr13	ALDBSSCT0000002964	ALDBSSCG0000001783	--	Annotated_lncRNA	200136375	200140268	+	ENSSSCT00000013158	ENSSSCG00000012026	ADAMTS1	A disintegrin and metalloproteinase with thrombospondin motifs 1 precursor [Source:RefSeq peptide;Acc:NP_001138315]	200127201	200135726	-	648	upstream
chr9	LNC_001906	XLOC_113616	--	Novel_lncRNA	51212710	51220523	+	ENSSSCT00000016465	ENSSSCG00000015099	--	--	51178780	51209999	-	2710	upstream
chr9	LNC_001907	XLOC_113616	--	Novel_lncRNA	51213305	51220523	+	ENSSSCT00000016465	ENSSSCG00000015099	--	--	51178780	51209999	-	3305	upstream
chr13	ALDBSSCT0000003201	ALDBSSCG0000001928	--	Annotated_lncRNA	80720757	80738851	-	ENSSSCT00000027349	ENSSSCG00000023929	TXNRD3	thioredoxin reductase 3 [Source:HGNC Symbol;Acc:HGNC:20667]	80680406	80717889	-	2867	upstream
chr7	LNC_001738	XLOC_102887	--	Novel_lncRNA	102791297	102822681	+	ENSSSCT00000002613	ENSSSCG00000002349	ACOT4	acyl-CoA thioesterase 4 [Source:HGNC Symbol;Acc:HGNC:19748]	102786805	102791429	-	-133	antisense
chr7	LNC_001738	XLOC_102887	--	Novel_lncRNA	102791297	102822681	+	ENSSSCT00000002614	ENSSSCG00000002350	--	--	102828131	102831810	-	5449	downstream
chr7	ALDBSSCT0000010296	ALDBSSCG0000006258	--	Annotated_lncRNA	105955417	105959130	-	ENSSSCT00000002656	ENSSSCG00000002389	VASH1	vasohibin 1 [Source:HGNC Symbol;Acc:HGNC:19964]	105960537	105978240	+	1406	upstream
chr16	LNC_000989	XLOC_059472	--	Novel_lncRNA	24143607	24147896	+	ENSSSCT00000018344	ENSSSCG00000016846	WDR70	WD repeat domain 70 [Source:HGNC Symbol;Acc:HGNC:25495]	23761201	24139970	+	3636	downstream
chr1	ALDBSSCT0000000490	ALDBSSCG0000000292	--	Annotated_lncRNA	267659342	267660158	+	ENSSSCT00000005908	ENSSSCG00000005368	XPA	XPA, DNA damage recognition and repair factor [Source:HGNC Symbol;Acc:HGNC:12814]	267660924	267694870	-	765	downstream
chr1	ALDBSSCT0000000490	ALDBSSCG0000000292	--	Annotated_lncRNA	267659342	267660158	+	ENSSSCT00000005906	ENSSSCG00000005366	NCBP1	nuclear cap binding protein subunit 1 [Source:HGNC Symbol;Acc:HGNC:7658]	267580548	267658539	+	802	downstream
chrX	LNC_002013	XLOC_120412	--	Novel_lncRNA	72699697	72706534	+	ENSSSCT00000033853	ENSSSCG00000012448	ITM2A	integral membrane protein 2A [Source:HGNC Symbol;Acc:HGNC:6173]	72699054	72706041	-	-6345	antisense
chrX	LNC_002013	XLOC_120412	--	Novel_lncRNA	72699697	72706534	+	ENSSSCT00000034500	ENSSSCG00000012448	ITM2A	integral membrane protein 2A [Source:HGNC Symbol;Acc:HGNC:6173]	72699995	72706021	-	-6027	antisense
chrX	LNC_002013	XLOC_120412	--	Novel_lncRNA	72699697	72706534	+	ENSSSCT00000036132	ENSSSCG00000012448	ITM2A	integral membrane protein 2A [Source:HGNC Symbol;Acc:HGNC:6173]	72701837	72706320	-	-4484	antisense
chrX	LNC_002013	XLOC_120412	--	Novel_lncRNA	72699697	72706534	+	ENSSSCT00000013614	ENSSSCG00000012448	ITM2A	integral membrane protein 2A [Source:HGNC Symbol;Acc:HGNC:6173]	72699045	72705893	-	-6197	antisense
chrX	LNC_002013	XLOC_120412	--	Novel_lncRNA	72699697	72706534	+	ENSSSCT00000033823	ENSSSCG00000012448	ITM2A	integral membrane protein 2A [Source:HGNC Symbol;Acc:HGNC:6173]	72699700	72706025	-	-6326	antisense
chrX	LNC_002013	XLOC_120412	--	Novel_lncRNA	72699697	72706534	+	ENSSSCT00000032830	ENSSSCG00000012448	ITM2A	integral membrane protein 2A [Source:HGNC Symbol;Acc:HGNC:6173]	72699742	72705932	-	-6191	antisense
chr7	LNC_001751	XLOC_103695	--	Novel_lncRNA	20737854	20738967	-	ENSSSCT00000001191	ENSSSCG00000001095	GMNN	geminin, DNA replication inhibitor [Source:HGNC Symbol;Acc:HGNC:17493]	20739307	20748725	+	339	upstream
chrX	LNC_002012	XLOC_120406	--	Novel_lncRNA	72513118	72542899	+	ENSSSCT00000031915	ENSSSCG00000030020	--	--	72545720	72546721	+	2820	upstream
chrX	LNC_002011	XLOC_120406	--	Novel_lncRNA	72513106	72545327	+	ENSSSCT00000031915	ENSSSCG00000030020	--	--	72545720	72546721	+	392	upstream
chr6	ALDBSSCT0000009181	ALDBSSCG0000005593	--	Annotated_lncRNA	156127454	156128279	+	ENSSSCT00000023375	ENSSSCG00000021745	ERMAP	erythroblast membrane associated protein (Scianna blood group) [Source:HGNC Symbol;Acc:HGNC:15743]	156023328	156120994	-	6459	upstream
chr1	ENSSSCT00000021690	ENSSSCG00000020095	7SK	Annotated_lncRNA	35489275	35489549	-	ENSSSCT00000030957	ENSSSCG00000004196	--	--	35469179	35507377	-	-275	sense_overlapping
chr1	ENSSSCT00000021690	ENSSSCG00000020095	7SK	Annotated_lncRNA	35489275	35489549	-	ENSSSCT00000004637	ENSSSCG00000004196	--	--	35469179	35507377	-	-275	sense_overlapping
chr6	ALDBSSCT0000009474	ALDBSSCG0000005778	--	Annotated_lncRNA	96138072	96163022	-	ENSSSCT00000004088	ENSSSCG00000003690	--	--	96171011	96230469	+	7988	upstream
chr6	ALDBSSCT0000009473	ALDBSSCG0000005778	--	Annotated_lncRNA	96138072	96162231	-	ENSSSCT00000004088	ENSSSCG00000003690	--	--	96171011	96230469	+	8779	upstream
chr14	LNC_000879	XLOC_051974	--	Novel_lncRNA	102538853	102560596	-	ENSSSCT00000028498	ENSSSCG00000027984	ZWINT	ZW10 interacting kinetochore protein [Source:HGNC Symbol;Acc:HGNC:13195]	102560761	102565212	+	164	upstream
chr14	LNC_000876	XLOC_051732	--	Novel_lncRNA	96806552	96807935	-	ENSSSCT00000022910	ENSSSCG00000025840	--	--	96808153	96817027	-	217	downstream
chr14	LNC_000876	XLOC_051732	--	Novel_lncRNA	96806552	96807935	-	ENSSSCT00000011362	ENSSSCG00000010380	MAPK8	-	96724944	96798725	+	7826	downstream
chr14	LNC_000875	XLOC_051713	--	Novel_lncRNA	95753626	95758098	-	ENSSSCT00000011351	ENSSSCG00000010369	--	--	95764350	95766145	+	6251	upstream
chr14	LNC_000873	XLOC_051646	--	Novel_lncRNA	88881981	88885950	-	ENSSSCT00000011320	ENSSSCG00000010340	FAM213A	family with sequence similarity 213 member A [Source:HGNC Symbol;Acc:HGNC:28651]	88856794	88878615	+	3365	downstream
chr13	LNC_000721	XLOC_042740	--	Novel_lncRNA	7719139	7721569	-	ENSSSCT00000012271	ENSSSCG00000011205	EFHB	EF-hand domain family member B [Source:HGNC Symbol;Acc:HGNC:26330]	7728155	7798134	+	6585	upstream
chr4	ALDBSSCT0000008215	ALDBSSCG0000004990	--	Annotated_lncRNA	143361773	143383381	-	ENSSSCT00000007614	ENSSSCG00000006949	MCOLN3	-	143385063	143394296	-	1681	downstream
chr7	ALDBSSCT0000009982	ALDBSSCG0000006072	--	Annotated_lncRNA	129771697	129782915	+	ENSSSCT00000002816	ENSSSCG00000002536	--	--	129784220	129788043	+	1304	upstream
chr13	ALDBSSCT0000003295	ALDBSSCG0000001983	--	Annotated_lncRNA	140626946	140632114	-	ENSSSCT00000026743	ENSSSCG00000026362	HES1	hes family bHLH transcription factor 1 [Source:HGNC Symbol;Acc:HGNC:5192]	140633173	140635748	+	1058	upstream
chr7	ENSSSCT00000034287	ENSSSCG00000001396	SLA-8	Annotated_lncRNA	27626975	27627652	-	ENSSSCT00000035331	ENSSSCG00000024161	SLA-7	-	27614074	27617328	+	9646	downstream
chr7	ENSSSCT00000034287	ENSSSCG00000001396	SLA-8	Annotated_lncRNA	27626975	27627652	-	ENSSSCT00000001524	ENSSSCG00000024161	SLA-7	-	27614074	27617558	+	9416	downstream
chr7	ENSSSCT00000034287	ENSSSCG00000001396	SLA-8	Annotated_lncRNA	27626975	27627652	-	ENSSSCT00000001336	ENSSSCG00000024161	SLA-7	-	27614074	27617558	+	9416	downstream
chr6	ALDBSSCT0000008960	ALDBSSCG0000005485	--	Annotated_lncRNA	82423133	82435833	+	ENSSSCT00000031351	ENSSSCG00000023122	KHDRBS1	KH RNA binding domain containing, signal transduction associated 1 [Source:HGNC Symbol;Acc:HGNC:18116]	82393592	82421718	+	1414	downstream
chr5	ALDBSSCT0000008588	ALDBSSCG0000005228	--	Annotated_lncRNA	64777292	64804282	-	ENSSSCT00000000707	ENSSSCG00000000652	CLEC12A	C-type lectin domain family 12, member A [Source:RefSeq peptide;Acc:NP_001288598]	64755503	64769738	+	7553	downstream
chr5	ALDBSSCT0000008587	ALDBSSCG0000005227	--	Annotated_lncRNA	63823483	63826448	-	ENSSSCT00000000676	ENSSSCG00000000629	-	basic proline-rich protein precursor [Source:RefSeq peptide;Acc:NP_001092050]	63816468	63819555	+	3927	downstream
chr5	ALDBSSCT0000008587	ALDBSSCG0000005227	--	Annotated_lncRNA	63823483	63826448	-	ENSSSCT00000000675	ENSSSCG00000000629	-	basic proline-rich protein precursor [Source:RefSeq peptide;Acc:NP_001092050]	63816468	63819555	+	3927	downstream
chr4	ALDBSSCT0000008053	ALDBSSCG0000004888	--	Annotated_lncRNA	100629885	100647782	-	ENSSSCT00000007068	ENSSSCG00000006453	KIRREL	kin of IRRE like (Drosophila) [Source:HGNC Symbol;Acc:HGNC:15734]	100516197	100627943	-	1941	upstream
chr4	ALDBSSCT0000008053	ALDBSSCG0000004888	--	Annotated_lncRNA	100629885	100647782	-	ENSSSCT00000033538	ENSSSCG00000006453	KIRREL	kin of IRRE like (Drosophila) [Source:HGNC Symbol;Acc:HGNC:15734]	100516094	100627908	-	1976	upstream
chr4	ALDBSSCT0000008053	ALDBSSCG0000004888	--	Annotated_lncRNA	100629885	100647782	-	ENSSSCT00000036287	ENSSSCG00000006453	KIRREL	kin of IRRE like (Drosophila) [Source:HGNC Symbol;Acc:HGNC:15734]	100515283	100628291	-	1593	upstream
chrX	ALDBSSCT0000011966	ALDBSSCG0000007283	--	Annotated_lncRNA	113365705	113380462	+	ENSSSCT00000035426	ENSSSCG00000023277	NDUFA1	NADH:ubiquinone oxidoreductase subunit A1 [Source:HGNC Symbol;Acc:HGNC:7683]	113388190	113392326	-	7727	downstream
chrX	ALDBSSCT0000011966	ALDBSSCG0000007283	--	Annotated_lncRNA	113365705	113380462	+	ENSSSCT00000027917	ENSSSCG00000023277	NDUFA1	NADH:ubiquinone oxidoreductase subunit A1 [Source:HGNC Symbol;Acc:HGNC:7683]	113390205	113392008	-	9742	downstream
chr8	ALDBSSCT0000010953	ALDBSSCG0000006639	--	Annotated_lncRNA	110321323	110324627	-	ENSSSCT00000029448	ENSSSCG00000026698	--	--	110329810	110365693	+	5182	upstream
chr8	ALDBSSCT0000010950	ALDBSSCG0000006636	--	Annotated_lncRNA	108197217	108199556	-	ENSSSCT00000009949	ENSSSCG00000009083	SPRY1	sprouty RTK signaling antagonist 1 [Source:HGNC Symbol;Acc:HGNC:11269]	108000816	108196659	-	557	upstream
chr8	ALDBSSCT0000010955	ALDBSSCG0000006641	--	Annotated_lncRNA	112146278	112150706	-	ENSSSCT00000024667	ENSSSCG00000023174	USP53	ubiquitin specific peptidase 53 [Source:HGNC Symbol;Acc:HGNC:29255]	112155302	112193360	-	4595	downstream
chr12	LNC_000619	XLOC_037244	--	Novel_lncRNA	34078584	34080928	-	ENSSSCT00000019177	ENSSSCG00000017615	DGKE	diacylglycerol kinase epsilon [Source:HGNC Symbol;Acc:HGNC:2852]	34090057	34117201	+	9128	upstream
chr12	LNC_000619	XLOC_037244	--	Novel_lncRNA	34078584	34080928	-	ENSSSCT00000019176	ENSSSCG00000017614	TRIM25	-	34081009	34087929	+	80	upstream
chr12	LNC_000619	XLOC_037244	--	Novel_lncRNA	34078584	34080928	-	ENSSSCT00000035478	ENSSSCG00000017614	TRIM25	-	34080929	34087674	+	0	upstream
chr12	LNC_000618	XLOC_037244	--	Novel_lncRNA	34078584	34080928	-	ENSSSCT00000019177	ENSSSCG00000017615	DGKE	diacylglycerol kinase epsilon [Source:HGNC Symbol;Acc:HGNC:2852]	34090057	34117201	+	9128	upstream
chr12	LNC_000618	XLOC_037244	--	Novel_lncRNA	34078584	34080928	-	ENSSSCT00000019176	ENSSSCG00000017614	TRIM25	-	34081009	34087929	+	80	upstream
chr12	LNC_000618	XLOC_037244	--	Novel_lncRNA	34078584	34080928	-	ENSSSCT00000035478	ENSSSCG00000017614	TRIM25	-	34080929	34087674	+	0	upstream
chr12	LNC_000613	XLOC_036939	--	Novel_lncRNA	18386578	18391355	-	ENSSSCT00000018866	ENSSSCG00000017330	MAP3K14	mitogen-activated protein kinase kinase kinase 14 [Source:HGNC Symbol;Acc:HGNC:6853]	18391642	18431381	+	286	upstream
chr12	LNC_000613	XLOC_036939	--	Novel_lncRNA	18386578	18391355	-	ENSSSCT00000024382	ENSSSCG00000017330	MAP3K14	mitogen-activated protein kinase kinase kinase 14 [Source:HGNC Symbol;Acc:HGNC:6853]	18391607	18430175	+	251	upstream
chr12	LNC_000612	XLOC_036925	--	Novel_lncRNA	17840424	17854110	-	ENSSSCT00000026860	ENSSSCG00000030183	--	--	17854253	17875764	+	142	upstream
chr12	LNC_000611	XLOC_036925	--	Novel_lncRNA	17840424	17854037	-	ENSSSCT00000026860	ENSSSCG00000030183	--	--	17854253	17875764	+	215	upstream
chr12	LNC_000610	XLOC_036910	--	Novel_lncRNA	15886420	15902903	-	ENSSSCT00000023789	ENSSSCG00000017299	MARCH10	membrane associated ring-CH-type finger 10 [Source:HGNC Symbol;Acc:HGNC:26655]	15910048	15944341	+	7144	upstream
chr12	LNC_000610	XLOC_036910	--	Novel_lncRNA	15886420	15902903	-	ENSSSCT00000018835	ENSSSCG00000017299	MARCH10	membrane associated ring-CH-type finger 10 [Source:HGNC Symbol;Acc:HGNC:26655]	15897681	15944250	+	-5223	antisense
chr12	LNC_000617	XLOC_037244	--	Novel_lncRNA	34078584	34080928	-	ENSSSCT00000019177	ENSSSCG00000017615	DGKE	diacylglycerol kinase epsilon [Source:HGNC Symbol;Acc:HGNC:2852]	34090057	34117201	+	9128	upstream
chr12	LNC_000617	XLOC_037244	--	Novel_lncRNA	34078584	34080928	-	ENSSSCT00000019176	ENSSSCG00000017614	TRIM25	-	34081009	34087929	+	80	upstream
chr12	LNC_000617	XLOC_037244	--	Novel_lncRNA	34078584	34080928	-	ENSSSCT00000035478	ENSSSCG00000017614	TRIM25	-	34080929	34087674	+	0	upstream
chr12	LNC_000614	XLOC_037096	--	Novel_lncRNA	24076887	24078074	-	ENSSSCT00000019070	ENSSSCG00000017516	SP2	Sp2 transcription factor [Source:HGNC Symbol;Acc:HGNC:11207]	24074446	24076719	+	167	downstream
chr4	ALDBSSCT0000007765	ALDBSSCG0000004710	--	Annotated_lncRNA	139269624	139271966	+	ENSSSCT00000035464	ENSSSCG00000030801	GBP6	-	139280329	139299776	+	8362	upstream
chr6	ALDBSSCT0000008900	ALDBSSCG0000005440	--	Annotated_lncRNA	58332909	58335284	+	ENSSSCT00000003712	ENSSSCG00000003343	--	--	58309983	58324734	+	8174	downstream
chr2	ALDBSSCT0000005814	ALDBSSCG0000003533	--	Annotated_lncRNA	11930557	11931571	+	ENSSSCT00000030228	ENSSSCG00000027783	--	--	11909352	11923281	-	7275	upstream
chr5	LNC_001588	XLOC_092559	--	Novel_lncRNA	70437396	70453429	-	ENSSSCT00000000818	ENSSSCG00000000754	RAD52	RAD52 homolog, DNA repair protein [Source:HGNC Symbol;Acc:HGNC:9824]	70410182	70433628	-	3767	upstream
chr5	LNC_001584	XLOC_092538	--	Novel_lncRNA	69686853	69690567	-	ENSSSCT00000000811	ENSSSCG00000000747	--	--	69679985	69686586	-	266	upstream
chr5	LNC_001585	XLOC_092542	--	Novel_lncRNA	69901294	69905231	-	ENSSSCT00000024761	ENSSSCG00000030076	SLC6A13	solute carrier family 6 member 13 [Source:HGNC Symbol;Acc:HGNC:11046]	69865305	69898005	-	3288	upstream
chr5	LNC_001586	XLOC_092542	--	Novel_lncRNA	69901294	69905231	-	ENSSSCT00000024761	ENSSSCG00000030076	SLC6A13	solute carrier family 6 member 13 [Source:HGNC Symbol;Acc:HGNC:11046]	69865305	69898005	-	3288	upstream
chr5	LNC_001587	XLOC_092559	--	Novel_lncRNA	70435313	70453429	-	ENSSSCT00000000818	ENSSSCG00000000754	RAD52	RAD52 homolog, DNA repair protein [Source:HGNC Symbol;Acc:HGNC:9824]	70410182	70433628	-	1684	upstream
chr5	LNC_001580	XLOC_092405	--	Novel_lncRNA	64675558	64686482	-	ENSSSCT00000000704	ENSSSCG00000000650	CLEC1B	C-type lectin domain family 1 member B [Source:HGNC Symbol;Acc:HGNC:24356]	64695430	64700217	-	8947	downstream
chr5	LNC_001580	XLOC_092405	--	Novel_lncRNA	64675558	64686482	-	ENSSSCT00000036321	ENSSSCG00000000650	CLEC1B	C-type lectin domain family 1 member B [Source:HGNC Symbol;Acc:HGNC:24356]	64695366	64729282	-	8883	downstream
chr2	ALDBSSCT0000005819	ALDBSSCG0000003538	--	Annotated_lncRNA	16111642	16112999	+	ENSSSCT00000014445	ENSSSCG00000013225	--	--	16114075	16120282	+	1075	upstream
chr2	ALDBSSCT0000005819	ALDBSSCG0000003538	--	Annotated_lncRNA	16111642	16112999	+	ENSSSCT00000029478	ENSSSCG00000030610	--	--	16099993	16110763	+	878	downstream
chr5	ALDBSSCT0000008636	ALDBSSCG0000005256	--	Annotated_lncRNA	82959879	82960705	-	ENSSSCT00000028485	ENSSSCG00000027792	C12orf45	chromosome 12 open reading frame 45 [Source:HGNC Symbol;Acc:HGNC:28628]	82962984	82975482	-	2278	downstream
chr5	ALDBSSCT0000008636	ALDBSSCG0000005256	--	Annotated_lncRNA	82959879	82960705	-	ENSSSCT00000000913	ENSSSCG00000000839	ALDH1L2	aldehyde dehydrogenase 1 family member L2 [Source:HGNC Symbol;Acc:HGNC:26777]	82894882	82958376	+	1502	downstream
chr5	ALDBSSCT0000008636	ALDBSSCG0000005256	--	Annotated_lncRNA	82959879	82960705	-	ENSSSCT00000000912	ENSSSCG00000000839	ALDH1L2	aldehyde dehydrogenase 1 family member L2 [Source:HGNC Symbol;Acc:HGNC:26777]	82903124	82958376	+	1502	downstream
chr4	ALDBSSCT0000007673	ALDBSSCG0000004659	--	Annotated_lncRNA	110273431	110278677	+	ENSSSCT00000007343	ENSSSCG00000006704	--	--	110281179	110293011	-	2501	downstream
chr4	ALDBSSCT0000007671	ALDBSSCG0000004659	--	Annotated_lncRNA	110271463	110278831	+	ENSSSCT00000007343	ENSSSCG00000006704	--	--	110281179	110293011	-	2347	downstream
chr4	ALDBSSCT0000007674	ALDBSSCG0000004660	--	Annotated_lncRNA	111540349	111542601	+	ENSSSCT00000007359	ENSSSCG00000006718	ZNF697	zinc finger protein 697 [Source:HGNC Symbol;Acc:HGNC:32034]	111535848	111539337	+	1011	downstream
chr9	ALDBSSCT0000011214	ALDBSSCG0000006807	--	Annotated_lncRNA	63142961	63152414	+	ENSSSCT00000016615	ENSSSCG00000015246	ST14	suppression of tumorigenicity 14 [Source:HGNC Symbol;Acc:HGNC:11344]	63159460	63176946	-	7045	downstream
chr9	ALDBSSCT0000011214	ALDBSSCG0000006807	--	Annotated_lncRNA	63142961	63152414	+	ENSSSCT00000016616	ENSSSCG00000015247	ZBTB44	zinc finger and BTB domain containing 44 [Source:HGNC Symbol;Acc:HGNC:25001]	63071808	63135751	+	7209	downstream
chr9	ALDBSSCT0000011214	ALDBSSCG0000006807	--	Annotated_lncRNA	63142961	63152414	+	ENSSSCT00000032122	ENSSSCG00000015247	ZBTB44	zinc finger and BTB domain containing 44 [Source:HGNC Symbol;Acc:HGNC:25001]	63071808	63136385	+	6575	downstream
chr2	ALDBSSCT0000006410	ALDBSSCG0000003916	--	Annotated_lncRNA	121363171	121370570	-	ENSSSCT00000015522	ENSSSCG00000014204	DCP2	decapping mRNA 2 [Source:HGNC Symbol;Acc:HGNC:24452]	121372093	121426086	-	1522	downstream
chr2	ALDBSSCT0000006410	ALDBSSCG0000003916	--	Annotated_lncRNA	121363171	121370570	-	ENSSSCT00000031945	ENSSSCG00000028164	--	--	121330468	121358522	+	4648	downstream
chr13	ALDBSSCT0000003307	ALDBSSCG0000001989	--	Annotated_lncRNA	144607493	144621200	-	ENSSSCT00000012973	ENSSSCG00000011860	SLC12A8	solute carrier family 12 member 8 [Source:HGNC Symbol;Acc:HGNC:15595]	144631187	144754074	+	9986	upstream
chr13	ALDBSSCT0000003304	ALDBSSCG0000001986	--	Annotated_lncRNA	141254268	141257694	-	ENSSSCT00000012939	ENSSSCG00000011827	LSG1	large 60S subunit nuclear export GTPase 1 [Source:HGNC Symbol;Acc:HGNC:25652]	141225232	141253596	-	671	upstream
chr13	ALDBSSCT0000003304	ALDBSSCG0000001986	--	Annotated_lncRNA	141254268	141257694	-	ENSSSCT00000012940	ENSSSCG00000011828	FAM43A	family with sequence similarity 43 member A [Source:HGNC Symbol;Acc:HGNC:26888]	141266873	141269495	+	9178	upstream
chr11	LNC_000509	XLOC_031410	--	Novel_lncRNA	13994362	13998453	+	ENSSSCT00000010261	ENSSSCG00000009364	FREM2	FRAS1 related extracellular matrix protein 2 [Source:HGNC Symbol;Acc:HGNC:25396]	13998824	14221287	+	370	upstream
chr11	LNC_000508	XLOC_031410	--	Novel_lncRNA	13994354	13998453	+	ENSSSCT00000010261	ENSSSCG00000009364	FREM2	FRAS1 related extracellular matrix protein 2 [Source:HGNC Symbol;Acc:HGNC:25396]	13998824	14221287	+	370	upstream
chr10	LNC_000501	XLOC_030983	--	Novel_lncRNA	75573345	75576947	-	ENSSSCT00000023947	ENSSSCG00000028602	--	--	75547614	75565717	-	7627	upstream
chr17	LNC_001056	XLOC_063419	--	Novel_lncRNA	38433641	38450516	+	ENSSSCT00000007866	ENSSSCG00000007189	SDCBP2	syndecan binding protein 2 [Source:HGNC Symbol;Acc:HGNC:15756]	38419447	38437273	-	-3633	antisense
chr17	LNC_001056	XLOC_063419	--	Novel_lncRNA	38433641	38450516	+	ENSSSCT00000023137	ENSSSCG00000007189	SDCBP2	syndecan binding protein 2 [Source:HGNC Symbol;Acc:HGNC:15756]	38419447	38437273	-	-3633	antisense
chr17	LNC_001057	XLOC_063419	--	Novel_lncRNA	38433659	38450516	+	ENSSSCT00000007866	ENSSSCG00000007189	SDCBP2	syndecan binding protein 2 [Source:HGNC Symbol;Acc:HGNC:15756]	38419447	38437273	-	-3615	antisense
chr17	LNC_001057	XLOC_063419	--	Novel_lncRNA	38433659	38450516	+	ENSSSCT00000023137	ENSSSCG00000007189	SDCBP2	syndecan binding protein 2 [Source:HGNC Symbol;Acc:HGNC:15756]	38419447	38437273	-	-3615	antisense
chr15	ALDBSSCT0000004479	ALDBSSCG0000002730	--	Annotated_lncRNA	66239842	66244077	-	ENSSSCT00000024744	ENSSSCG00000026088	--	--	66248226	66249683	-	4148	downstream
chr15	ALDBSSCT0000004479	ALDBSSCG0000002730	--	Annotated_lncRNA	66239842	66244077	-	ENSSSCT00000023863	ENSSSCG00000028633	--	--	66230019	66238688	+	1153	downstream
chr12	ALDBSSCT0000002368	ALDBSSCG0000001433	--	Annotated_lncRNA	11794919	11796165	-	ENSSSCT00000018786	ENSSSCG00000017257	--	--	11732391	11787345	-	7573	upstream
chr17	LNC_001059	XLOC_063461	--	Novel_lncRNA	40650428	40650934	+	ENSSSCT00000007921	ENSSSCG00000007240	--	--	40656380	40667247	+	5445	upstream
chr4	ALDBSSCT0000008086	ALDBSSCG0000004908	--	Annotated_lncRNA	110221245	110255365	-	ENSSSCT00000034808	ENSSSCG00000006703	PRKAB2	protein kinase AMP-activated non-catalytic subunit beta 2 [Source:HGNC Symbol;Acc:HGNC:9379]	110208123	110219705	+	1539	downstream
chr4	ALDBSSCT0000008086	ALDBSSCG0000004908	--	Annotated_lncRNA	110221245	110255365	-	ENSSSCT00000007342	ENSSSCG00000006703	PRKAB2	protein kinase AMP-activated non-catalytic subunit beta 2 [Source:HGNC Symbol;Acc:HGNC:9379]	110208095	110219705	+	1539	downstream
chr4	ALDBSSCT0000008086	ALDBSSCG0000004908	--	Annotated_lncRNA	110221245	110255365	-	ENSSSCT00000032787	ENSSSCG00000006703	PRKAB2	protein kinase AMP-activated non-catalytic subunit beta 2 [Source:HGNC Symbol;Acc:HGNC:9379]	110208095	110219822	+	1422	downstream
chr4	ALDBSSCT0000008086	ALDBSSCG0000004908	--	Annotated_lncRNA	110221245	110255365	-	ENSSSCT00000034207	ENSSSCG00000006703	PRKAB2	protein kinase AMP-activated non-catalytic subunit beta 2 [Source:HGNC Symbol;Acc:HGNC:9379]	110208121	110217459	+	3785	downstream
chr4	ALDBSSCT0000008086	ALDBSSCG0000004908	--	Annotated_lncRNA	110221245	110255365	-	ENSSSCT00000036163	ENSSSCG00000006703	PRKAB2	protein kinase AMP-activated non-catalytic subunit beta 2 [Source:HGNC Symbol;Acc:HGNC:9379]	110207628	110219705	+	1539	downstream
GL896152.2	ALDBSSCT0000011846	ALDBSSCG0000007195	--	Annotated_lncRNA	24065	25471	-	ENSSSCT00000014136	ENSSSCG00000012931	RBM4B	RNA-binding protein 4B [Source:RefSeq peptide;Acc:NP_001116660]	4852	17208	+	6856	downstream
GL896183.1	ALDBSSCT0000011847	ALDBSSCG0000007196	--	Annotated_lncRNA	69460	70364	+	ENSSSCT00000025835	ENSSSCG00000026742	BTK	Sus scrofa Bruton agammaglobulinemia tyrosine kinase (BTK), mRNA. [Source:RefSeq mRNA;Acc:NM_001243576]	33491	64821	-	4638	upstream
GL896183.1	ALDBSSCT0000011847	ALDBSSCG0000007196	--	Annotated_lncRNA	69460	70364	+	ENSSSCT00000025640	ENSSSCG00000027146	GLA	alpha-galactosidase A [Source:RefSeq peptide;Acc:NP_001171396]	73942	82624	-	3577	downstream
GL895994.1	ALDBSSCT0000011845	ALDBSSCG0000007194	--	Annotated_lncRNA	42341	45385	+	ENSSSCT00000023042	ENSSSCG00000025379	CTDSP2	carboxy-terminal domain RNA polymerase II polypeptide A small phosphatase 2 [Source:RefSeq peptide;Acc:NP_001231476]	35182	41774	+	566	downstream
GL895994.1	ALDBSSCT0000011845	ALDBSSCG0000007194	--	Annotated_lncRNA	42341	45385	+	ENSSSCT00000032121	ENSSSCG00000029571	AVIL	advillin [Source:HGNC Symbol;Acc:HGNC:14188]	48802	65844	+	3416	upstream
chr13	ALDBSSCT0000003416	ALDBSSCG0000002055	--	Annotated_lncRNA	210988725	210991362	-	ENSSSCT00000013195	ENSSSCG00000012063	DSCR3	DSCR3 arrestin fold containing [Source:HGNC Symbol;Acc:HGNC:3044]	210992784	211046824	-	1421	downstream
chr14	ALDBSSCT0000003946	ALDBSSCG0000002377	--	Annotated_lncRNA	68150707	68152942	-	ENSSSCT00000011177	ENSSSCG00000010211	CCDC6	coiled-coil domain containing 6 [Source:HGNC Symbol;Acc:HGNC:18782]	68153446	68274345	-	503	downstream
chr12	ALDBSSCT0000002410	ALDBSSCG0000001459	--	Annotated_lncRNA	25387564	25391583	-	ENSSSCT00000024337	ENSSSCG00000027677	ABI3	ABI family member 3 [Source:HGNC Symbol;Acc:HGNC:29859]	25368698	25383610	+	3953	downstream
chr12	ALDBSSCT0000002410	ALDBSSCG0000001459	--	Annotated_lncRNA	25387564	25391583	-	ENSSSCT00000028456	ENSSSCG00000026701	PHOSPHO1	phosphoethanolamine/phosphocholine phosphatase [Source:HGNC Symbol;Acc:HGNC:16815]	25384751	25385629	-	1934	upstream
chr12	ALDBSSCT0000002413	ALDBSSCG0000001460	--	Annotated_lncRNA	26667004	26683385	-	ENSSSCT00000022259	ENSSSCG00000028962	--	--	26640169	26666384	+	619	downstream
chr12	ALDBSSCT0000002412	ALDBSSCG0000001460	--	Annotated_lncRNA	26667004	26683382	-	ENSSSCT00000022259	ENSSSCG00000028962	--	--	26640169	26666384	+	619	downstream
chr2	LNC_001139	XLOC_068431	--	Novel_lncRNA	12188950	12190331	+	ENSSSCT00000031344	ENSSSCG00000021176	LPXN	leupaxin [Source:HGNC Symbol;Acc:HGNC:14061]	12191484	12243400	+	1152	upstream
chr2	LNC_001138	XLOC_068421	--	Novel_lncRNA	11892545	11922968	+	ENSSSCT00000014367	ENSSSCG00000013147	FAM111B	family with sequence similarity 111 member B [Source:HGNC Symbol;Acc:HGNC:24200]	11881575	11892422	-	122	upstream
chr2	LNC_001134	XLOC_068274	--	Novel_lncRNA	6853314	6862201	+	ENSSSCT00000014241	ENSSSCG00000013028	ESRRA	estrogen related receptor alpha [Source:HGNC Symbol;Acc:HGNC:3471]	6867951	6878759	-	5749	downstream
chr2	LNC_001134	XLOC_068274	--	Novel_lncRNA	6853314	6862201	+	ENSSSCT00000014242	ENSSSCG00000013029	TRMT112	tRNA methyltransferase 11-2 homolog (S. cerevisiae) [Source:HGNC Symbol;Acc:HGNC:26940]	6868094	6869375	+	5892	upstream
chr2	LNC_001134	XLOC_068274	--	Novel_lncRNA	6853314	6862201	+	ENSSSCT00000014243	ENSSSCG00000013030	PRDX5	peroxiredoxin 5 [Source:HGNC Symbol;Acc:HGNC:9355]	6864027	6867851	-	1825	downstream
chr2	LNC_001137	XLOC_068421	--	Novel_lncRNA	11892545	11914776	+	ENSSSCT00000030228	ENSSSCG00000027783	--	--	11909352	11923281	-	-5425	antisense
chr2	LNC_001137	XLOC_068421	--	Novel_lncRNA	11892545	11914776	+	ENSSSCT00000014367	ENSSSCG00000013147	FAM111B	family with sequence similarity 111 member B [Source:HGNC Symbol;Acc:HGNC:24200]	11881575	11892422	-	122	upstream
chr2	LNC_001136	XLOC_068388	--	Novel_lncRNA	10785627	10844894	+	ENSSSCT00000023319	ENSSSCG00000021812	MS4A1	membrane-spanning 4-domains, subfamily A, member 1 [Source:HGNC Symbol;Acc:HGNC:7315]	10774613	10787896	-	-2270	antisense
chr2	LNC_001131	XLOC_068244	--	Novel_lncRNA	6156001	6158992	+	ENSSSCT00000014210	ENSSSCG00000012999	CAPN1	calpain 1 [Source:HGNC Symbol;Acc:HGNC:1476]	6129549	6155373	-	627	upstream
chr18	LNC_001130	XLOC_067825	--	Novel_lncRNA	55290630	55304343	-	ENSSSCT00000018220	ENSSSCG00000016738	H2AFZ	histone H2A.Z [Source:RefSeq peptide;Acc:NP_001116594]	55305335	55314890	-	991	downstream
chr18	LNC_001130	XLOC_067825	--	Novel_lncRNA	55290630	55304343	-	ENSSSCT00000018219	ENSSSCG00000016737	--	--	55287036	55290463	+	166	downstream
chr2	LNC_001133	XLOC_068270	--	Novel_lncRNA	6764510	6771409	+	ENSSSCT00000029221	ENSSSCG00000020831	SLC22A11	solute carrier family 22 member 11 [Source:HGNC Symbol;Acc:HGNC:18120]	6777940	6791460	+	6530	upstream
chr2	LNC_001132	XLOC_068244	--	Novel_lncRNA	6156935	6167204	+	ENSSSCT00000014210	ENSSSCG00000012999	CAPN1	calpain 1 [Source:HGNC Symbol;Acc:HGNC:1476]	6129549	6155373	-	1561	upstream
chr10	LNC_000478	XLOC_030082	--	Novel_lncRNA	31706523	31712388	-	ENSSSCT00000011979	ENSSSCG00000010944	FBP1	fructose-1,6-bisphosphatase 1 [Source:RefSeq peptide;Acc:NP_999144]	31712488	31830025	+	99	upstream
chr17	ENSSSCT00000036444	ENSSSCG00000007280	ITCH	Annotated_lncRNA	43030475	43114974	+	ENSSSCT00000007964	ENSSSCG00000007279	DYNLRB1	dynein light chain roadblock-type 1 [Source:HGNC Symbol;Acc:HGNC:15468]	43121869	43139869	+	6894	upstream
chr2	ALDBSSCT0000006309	ALDBSSCG0000003857	--	Annotated_lncRNA	65445882	65447552	-	ENSSSCT00000015038	ENSSSCG00000013764	RFX1	regulatory factor X1 [Source:HGNC Symbol;Acc:HGNC:9982]	65455152	65479727	+	7599	upstream
chr2	ALDBSSCT0000006308	ALDBSSCG0000003857	--	Annotated_lncRNA	65442321	65447759	-	ENSSSCT00000015038	ENSSSCG00000013764	RFX1	regulatory factor X1 [Source:HGNC Symbol;Acc:HGNC:9982]	65455152	65479727	+	7392	upstream
chr3	ALDBSSCT0000007255	ALDBSSCG0000004399	--	Annotated_lncRNA	90402363	90406702	-	ENSSSCT00000009196	ENSSSCG00000008399	--	--	90413973	90422822	+	7270	upstream
chr2	ALDBSSCT0000006305	ALDBSSCG0000003856	--	Annotated_lncRNA	65336211	65338114	-	ENSSSCT00000015047	ENSSSCG00000013772	ASF1B	anti-silencing function 1B histone chaperone [Source:HGNC Symbol;Acc:HGNC:20996]	65338638	65348235	+	523	upstream
chr2	LNC_001220	XLOC_073572	--	Novel_lncRNA	76095819	76097866	-	ENSSSCT00000027155	ENSSSCG00000029279	GNA11	guanine nucleotide binding protein (G protein), alpha 11 (Gq class) [Source:HGNC Symbol;Acc:HGNC:4379]	76070800	76090633	+	5185	downstream
chr2	LNC_001225	XLOC_073758	--	Novel_lncRNA	84257012	84261584	-	ENSSSCT00000015371	ENSSSCG00000014071	BTF3	basic transcription factor 3 [Source:HGNC Symbol;Acc:HGNC:1125]	84262050	84269834	-	465	downstream
chr3	ALDBSSCT0000007328	ALDBSSCG0000004450	--	Annotated_lncRNA	121968850	121979173	-	ENSSSCT00000029206	ENSSSCG00000026283	UBXN2A	UBX domain protein 2A [Source:HGNC Symbol;Acc:HGNC:27265]	121943291	121959714	-	9135	upstream
chr3	ALDBSSCT0000007328	ALDBSSCG0000004450	--	Annotated_lncRNA	121968850	121979173	-	ENSSSCT00000029299	ENSSSCG00000026283	UBXN2A	UBX domain protein 2A [Source:HGNC Symbol;Acc:HGNC:27265]	121943291	121959525	-	9324	upstream
chr3	ALDBSSCT0000007328	ALDBSSCG0000004450	--	Annotated_lncRNA	121968850	121979173	-	ENSSSCT00000009401	ENSSSCG00000008591	--	--	121987652	122035858	+	8478	upstream
chr4	ENSSSCT00000035465	ENSSSCG00000006687	ITGA10	Annotated_lncRNA	109065647	109070602	+	ENSSSCT00000007324	ENSSSCG00000006685	GNRHR2	-	109053018	109057325	-	8321	upstream
chr4	ENSSSCT00000035465	ENSSSCG00000006687	ITGA10	Annotated_lncRNA	109065647	109070602	+	ENSSSCT00000007325	ENSSSCG00000006686	PEX11B	peroxisomal biogenesis factor 11 beta [Source:HGNC Symbol;Acc:HGNC:8853]	109057964	109064028	+	1618	downstream
chr4	ENSSSCT00000035465	ENSSSCG00000006687	ITGA10	Annotated_lncRNA	109065647	109070602	+	ENSSSCT00000007323	ENSSSCG00000006685	GNRHR2	-	109053018	109057358	-	8288	upstream
chr7	LNC_001748	XLOC_103449	--	Novel_lncRNA	9961379	9974365	-	ENSSSCT00000001147	ENSSSCG00000001053	TBC1D7	TBC1 domain family member 7 [Source:HGNC Symbol;Acc:HGNC:21066]	9976369	10048579	-	2003	downstream
chr7	LNC_001748	XLOC_103449	--	Novel_lncRNA	9961379	9974365	-	ENSSSCT00000001146	ENSSSCG00000001052	PHACTR1	phosphatase and actin regulator 1 [Source:HGNC Symbol;Acc:HGNC:20990]	9509245	9954959	+	6419	downstream
GL893496.1	LNC_000060	XLOC_003638	--	Novel_lncRNA	17015	23083	+	ENSSSCT00000028695	ENSSSCG00000023526	RAPGEF3	Rap guanine nucleotide exchange factor 3 [Source:HGNC Symbol;Acc:HGNC:16629]	287	18625	-	-1611	antisense
GL893620.1	LNC_000061	XLOC_004080	--	Novel_lncRNA	40379	59155	-	ENSSSCT00000004401	ENSSSCG00000003979	ZNF684	zinc finger protein 684 [Source:HGNC Symbol;Acc:HGNC:28418]	46671	51609	+	-4939	antisense
GL893620.1	LNC_000061	XLOC_004080	--	Novel_lncRNA	40379	59155	-	ENSSSCT00000027325	ENSSSCG00000003979	ZNF684	zinc finger protein 684 [Source:HGNC Symbol;Acc:HGNC:28418]	46692	51603	+	-4912	antisense
GL893620.1	LNC_000062	XLOC_004080	--	Novel_lncRNA	40379	59899	-	ENSSSCT00000004401	ENSSSCG00000003979	ZNF684	zinc finger protein 684 [Source:HGNC Symbol;Acc:HGNC:28418]	46671	51609	+	-4939	antisense
GL893620.1	LNC_000062	XLOC_004080	--	Novel_lncRNA	40379	59899	-	ENSSSCT00000027325	ENSSSCG00000003979	ZNF684	zinc finger protein 684 [Source:HGNC Symbol;Acc:HGNC:28418]	46692	51603	+	-4912	antisense
GL893620.1	LNC_000063	XLOC_004080	--	Novel_lncRNA	54833	59881	-	ENSSSCT00000004401	ENSSSCG00000003979	ZNF684	zinc finger protein 684 [Source:HGNC Symbol;Acc:HGNC:28418]	46671	51609	+	3223	downstream
GL893620.1	LNC_000063	XLOC_004080	--	Novel_lncRNA	54833	59881	-	ENSSSCT00000027325	ENSSSCG00000003979	ZNF684	zinc finger protein 684 [Source:HGNC Symbol;Acc:HGNC:28418]	46692	51603	+	3229	downstream
chr8	ALDBSSCT0000010920	ALDBSSCG0000006622	--	Annotated_lncRNA	93076195	93090916	-	ENSSSCT00000023933	ENSSSCG00000020711	RAB33B	RAB33B, member RAS oncogene family [Source:HGNC Symbol;Acc:HGNC:16075]	93091614	93115467	+	697	upstream
chr4	ALDBSSCT0000008130	ALDBSSCG0000004933	--	Annotated_lncRNA	120819638	120826935	-	ENSSSCT00000007471	ENSSSCG00000006820	EPS8L3	EPS8 like 3 [Source:HGNC Symbol;Acc:HGNC:21297]	120833588	120848622	-	6652	downstream
chr4	ALDBSSCT0000008130	ALDBSSCG0000004933	--	Annotated_lncRNA	120819638	120826935	-	ENSSSCT00000007472	ENSSSCG00000006821	GSTM3	glutathione S-transferase mu 3 [Source:HGNC Symbol;Acc:HGNC:4635]	120827506	120830538	-	570	downstream
chr5	LNC_001572	XLOC_091739	--	Novel_lncRNA	24673516	24676442	-	ENSSSCT00000030620	ENSSSCG00000028797	--	--	24686184	24686936	+	9741	upstream
chr8	LNC_001829	XLOC_108542	--	Novel_lncRNA	124437326	124447533	+	ENSSSCT00000010025	ENSSSCG00000023548	--	--	124317963	124437200	+	125	downstream
chr3	LNC_001288	XLOC_077182	--	Novel_lncRNA	76395292	76399075	+	ENSSSCT00000009130	ENSSSCG00000008337	AAK1	AP2 associated kinase 1 [Source:HGNC Symbol;Acc:HGNC:19679]	76229711	76390236	+	5055	downstream
JH118967.1	LNC_000266	XLOC_016185	--	Novel_lncRNA	2193	4163	+	ENSSSCT00000028593	ENSSSCG00000024470	--	--	6938	16651	+	2774	upstream
chr16	ALDBSSCT0000004815	ALDBSSCG0000002927	--	Annotated_lncRNA	57568433	57598854	+	ENSSSCT00000018515	ENSSSCG00000017003	KCNIP1	Kv channel-interacting protein 1 [Source:RefSeq peptide;Acc:NP_001026947]	57544457	57558818	-	9614	upstream
JH118983.1	LNC_000268	XLOC_016265	--	Novel_lncRNA	21008	31140	-	ENSSSCT00000024238	ENSSSCG00000022459	--	--	37202	39128	+	6061	upstream
chr1	ALDBSSCT0000000804	ALDBSSCG0000000488	--	Annotated_lncRNA	128182923	128199037	-	ENSSSCT00000029885	ENSSSCG00000024210	--	--	128199543	128256685	+	505	upstream
chr1	ALDBSSCT0000000805	ALDBSSCG0000000489	--	Annotated_lncRNA	128898940	128913482	-	ENSSSCT00000005089	ENSSSCG00000004608	DYX1C1	dyslexia susceptibility 1 candidate 1 [Source:HGNC Symbol;Acc:HGNC:21493]	128819814	128890994	+	7945	downstream
chr1	ALDBSSCT0000000807	ALDBSSCG0000000491	--	Annotated_lncRNA	129055522	129059075	-	ENSSSCT00000022483	ENSSSCG00000023260	--	--	129044842	129049684	-	5837	upstream
chr7	LNC_001740	XLOC_102974	--	Novel_lncRNA	106155375	106161804	+	ENSSSCT00000002660	ENSSSCG00000002392	IRF2BPL	interferon regulatory factor 2 binding protein like [Source:HGNC Symbol;Acc:HGNC:14282]	106151786	106154137	-	1237	upstream
chr7	LNC_001741	XLOC_102974	--	Novel_lncRNA	106155401	106164633	+	ENSSSCT00000002660	ENSSSCG00000002392	IRF2BPL	interferon regulatory factor 2 binding protein like [Source:HGNC Symbol;Acc:HGNC:14282]	106151786	106154137	-	1263	upstream
chr13	ALDBSSCT0000002829	ALDBSSCG0000001723	--	Annotated_lncRNA	142784611	142787041	+	ENSSSCT00000012954	ENSSSCG00000011842	--	--	142776353	142777381	+	7229	downstream
chr7	LNC_001749	XLOC_103449	--	Novel_lncRNA	9961379	9975248	-	ENSSSCT00000001147	ENSSSCG00000001053	TBC1D7	TBC1 domain family member 7 [Source:HGNC Symbol;Acc:HGNC:21066]	9976369	10048579	-	1120	downstream
chr7	LNC_001749	XLOC_103449	--	Novel_lncRNA	9961379	9975248	-	ENSSSCT00000001146	ENSSSCG00000001052	PHACTR1	phosphatase and actin regulator 1 [Source:HGNC Symbol;Acc:HGNC:20990]	9509245	9954959	+	6419	downstream
chr5	ENSSSCT00000020533	ENSSSCG00000018938	7SK	Annotated_lncRNA	53747062	53747394	+	ENSSSCT00000000610	ENSSSCG00000000567	--	--	53723750	53752858	-	-333	antisense
chr8	ALDBSSCT0000010490	ALDBSSCG0000006366	--	Annotated_lncRNA	58643037	58644377	+	ENSSSCT00000009754	ENSSSCG00000008908	PDCL2	phosducin like 2 [Source:HGNC Symbol;Acc:HGNC:29524]	58607533	58634866	+	8170	downstream
chr8	ALDBSSCT0000010491	ALDBSSCG0000006366	--	Annotated_lncRNA	58643579	58644377	+	ENSSSCT00000009754	ENSSSCG00000008908	PDCL2	phosducin like 2 [Source:HGNC Symbol;Acc:HGNC:29524]	58607533	58634866	+	8712	downstream
chr9	LNC_001971	XLOC_117419	--	Novel_lncRNA	57491063	57492491	-	ENSSSCT00000016566	ENSSSCG00000015200	--	--	57498520	57507892	-	6028	downstream
chr9	LNC_001971	XLOC_117419	--	Novel_lncRNA	57491063	57492491	-	ENSSSCT00000016565	ENSSSCG00000015199	--	--	57492954	57497554	-	462	downstream
chr9	LNC_001919	XLOC_115130	--	Novel_lncRNA	119476487	119477959	+	ENSSSCT00000031911	ENSSSCG00000020963	--	--	119465473	119469537	+	6949	downstream
chr13	ALDBSSCT0000002821	ALDBSSCG0000001715	--	Annotated_lncRNA	134685471	134702667	+	ENSSSCT00000012922	ENSSSCG00000011810	--	--	134660903	134684897	-	573	upstream
chr9	LNC_001917	XLOC_115096	--	Novel_lncRNA	116884824	116894503	+	ENSSSCT00000016815	ENSSSCG00000015435	NAMPT	nicotinamide phosphoribosyltransferase [Source:HGNC Symbol;Acc:HGNC:30092]	116890800	116931198	-	-3704	antisense
chr9	LNC_001973	XLOC_117482	--	Novel_lncRNA	62612273	62613834	-	ENSSSCT00000016608	ENSSSCG00000015239	BARX2	BARX homeobox 2 [Source:HGNC Symbol;Acc:HGNC:956]	62607366	62620602	+	-1562	antisense
chr8	ALDBSSCT0000010546	ALDBSSCG0000006395	--	Annotated_lncRNA	85453335	85467073	+	ENSSSCT00000009885	ENSSSCG00000009026	--	--	85443611	85446689	-	6645	upstream
chr6	ALDBSSCT0000009262	ALDBSSCG0000005645	--	Annotated_lncRNA	25450794	25452092	-	ENSSSCT00000003072	ENSSSCG00000002774	--	--	25438878	25447925	+	2868	downstream
chr1	ALDBSSCT0000000570	ALDBSSCG0000000339	--	Annotated_lncRNA	308642108	308643667	+	ENSSSCT00000006336	ENSSSCG00000005760	C9orf116	chromosome 9 open reading frame 116 [Source:HGNC Symbol;Acc:HGNC:28435]	308630224	308634807	-	7300	upstream
chr1	ALDBSSCT0000000570	ALDBSSCG0000000339	--	Annotated_lncRNA	308642108	308643667	+	ENSSSCT00000006335	ENSSSCG00000005759	MRPS2	mitochondrial ribosomal protein S2 [Source:HGNC Symbol;Acc:HGNC:14495]	308635546	308639471	+	2636	downstream
GL894621.1	ALDBSSCT0000011832	ALDBSSCG0000007184	--	Annotated_lncRNA	35271	37796	-	ENSSSCT00000030605	ENSSSCG00000024267	TMEM50A	transmembrane protein 50A [Source:HGNC Symbol;Acc:HGNC:30590]	41569	53614	+	3772	upstream
GL894621.1	ALDBSSCT0000011832	ALDBSSCG0000007184	--	Annotated_lncRNA	35271	37796	-	ENSSSCT00000029072	ENSSSCG00000030242	RSRP1	arginine and serine rich protein 1 [Source:HGNC Symbol;Acc:HGNC:25234]	28009	30628	-	4642	upstream
chr7	ALDBSSCT0000009789	ALDBSSCG0000005969	--	Annotated_lncRNA	59045383	59046100	+	ENSSSCT00000025421	ENSSSCG00000023794	--	--	59043062	59043553	+	1829	downstream
GL894621.1	ALDBSSCT0000011834	ALDBSSCG0000007184	--	Annotated_lncRNA	36491	38200	-	ENSSSCT00000030605	ENSSSCG00000024267	TMEM50A	transmembrane protein 50A [Source:HGNC Symbol;Acc:HGNC:30590]	41569	53614	+	3368	upstream
GL894621.1	ALDBSSCT0000011834	ALDBSSCG0000007184	--	Annotated_lncRNA	36491	38200	-	ENSSSCT00000029072	ENSSSCG00000030242	RSRP1	arginine and serine rich protein 1 [Source:HGNC Symbol;Acc:HGNC:25234]	28009	30628	-	5862	upstream
chr6	ALDBSSCT0000009195	ALDBSSCG0000005599	--	Annotated_lncRNA	250080	251725	-	ENSSSCT00000002929	ENSSSCG00000002639	TUBB3	tubulin beta 3 class III [Source:HGNC Symbol;Acc:HGNC:20772]	259395	268749	+	7669	upstream
chr6	ALDBSSCT0000009195	ALDBSSCG0000005599	--	Annotated_lncRNA	250080	251725	-	ENSSSCT00000022534	ENSSSCG00000020924	MC1R	melanocortin 1 receptor (alpha melanocyte stimulating hormone receptor) [Source:HGNC Symbol;Acc:HGNC:6929]	255611	256573	+	3885	upstream
chr6	ALDBSSCT0000009196	ALDBSSCG0000005600	--	Annotated_lncRNA	920649	922395	-	ENSSSCT00000002932	ENSSSCG00000002642	CDH15	cadherin 15 [Source:HGNC Symbol;Acc:HGNC:1754]	923672	932461	+	1276	upstream
chr3	ALDBSSCT0000006787	ALDBSSCG0000004144	--	Annotated_lncRNA	92055400	92060072	+	ENSSSCT00000023995	ENSSSCG00000022089	ADGRF4	adhesion G protein-coupled receptor F4 [Source:HGNC Symbol;Acc:HGNC:19011]	92062807	92084641	+	2734	upstream
chrX	LNC_002026	XLOC_121404	--	Novel_lncRNA	143696233	143699449	+	ENSSSCT00000027724	ENSSSCG00000030421	GDI1	GDP dissociation inhibitor 1 [Source:HGNC Symbol;Acc:HGNC:4226]	143687111	143693195	-	3037	upstream
chrX	LNC_002027	XLOC_121527	--	Novel_lncRNA	10542026	10548882	-	ENSSSCT00000036603	ENSSSCG00000012119	--	--	10549831	10551228	+	948	upstream
chrX	LNC_002027	XLOC_121527	--	Novel_lncRNA	10542026	10548882	-	ENSSSCT00000036667	ENSSSCG00000012119	--	--	10550295	10551375	+	1412	upstream
chrX	LNC_002027	XLOC_121527	--	Novel_lncRNA	10542026	10548882	-	ENSSSCT00000035781	ENSSSCG00000012119	--	--	10549295	10551375	+	412	upstream
chrX	LNC_002027	XLOC_121527	--	Novel_lncRNA	10542026	10548882	-	ENSSSCT00000013257	ENSSSCG00000012119	--	--	10549271	10551376	+	388	upstream
chrX	LNC_002027	XLOC_121527	--	Novel_lncRNA	10542026	10548882	-	ENSSSCT00000033294	ENSSSCG00000012119	--	--	10549969	10551035	+	1086	upstream
chrX	LNC_002024	XLOC_121049	--	Novel_lncRNA	126898551	126899901	+	ENSSSCT00000013876	ENSSSCG00000012693	CT55	cancer/testis antigen 55 [Source:HGNC Symbol;Acc:HGNC:26047]	126871549	126900021	-	-1351	antisense
chrX	LNC_002024	XLOC_121049	--	Novel_lncRNA	126898551	126899901	+	ENSSSCT00000013877	ENSSSCG00000028930	--	--	126896830	126897033	+	1517	downstream
chr9	ALDBSSCT0000011524	ALDBSSCG0000007002	--	Annotated_lncRNA	46852304	46890768	-	ENSSSCT00000016422	ENSSSCG00000015056	--	--	46899880	46901601	-	9111	downstream
chrX	LNC_002028	XLOC_122021	--	Novel_lncRNA	47752175	47756798	-	ENSSSCT00000023255	ENSSSCG00000027237	GATA1	GATA binding protein 1 [Source:HGNC Symbol;Acc:HGNC:4170]	47745337	47752876	+	-702	antisense
chrX	LNC_002028	XLOC_122021	--	Novel_lncRNA	47752175	47756798	-	ENSSSCT00000032141	ENSSSCG00000028900	--	--	47764737	47769886	+	7938	upstream
chr8	ALDBSSCT0000010721	ALDBSSCG0000006488	--	Annotated_lncRNA	115218	128773	-	ENSSSCT00000030851	ENSSSCG00000029983	PCGF3	polycomb group ring finger 3 [Source:HGNC Symbol;Acc:HGNC:10066]	81532	113453	-	1764	upstream
chr8	ALDBSSCT0000010722	ALDBSSCG0000006489	--	Annotated_lncRNA	689174	690307	-	ENSSSCT00000009502	ENSSSCG00000008685	--	--	685594	688513	-	660	upstream
chr8	ALDBSSCT0000010722	ALDBSSCG0000006489	--	Annotated_lncRNA	689174	690307	-	ENSSSCT00000009504	ENSSSCG00000008687	MXD4	MAX dimerization protein 4 [Source:HGNC Symbol;Acc:HGNC:13906]	697975	708656	-	7667	downstream
chr8	ALDBSSCT0000010722	ALDBSSCG0000006489	--	Annotated_lncRNA	689174	690307	-	ENSSSCT00000027138	ENSSSCG00000008687	MXD4	MAX dimerization protein 4 [Source:HGNC Symbol;Acc:HGNC:13906]	697975	708539	-	7667	downstream
chr8	ALDBSSCT0000010723	ALDBSSCG0000006489	--	Annotated_lncRNA	689174	690363	-	ENSSSCT00000009502	ENSSSCG00000008685	--	--	685594	688513	-	660	upstream
chr8	ALDBSSCT0000010723	ALDBSSCG0000006489	--	Annotated_lncRNA	689174	690363	-	ENSSSCT00000009504	ENSSSCG00000008687	MXD4	MAX dimerization protein 4 [Source:HGNC Symbol;Acc:HGNC:13906]	697975	708656	-	7611	downstream
chr8	ALDBSSCT0000010723	ALDBSSCG0000006489	--	Annotated_lncRNA	689174	690363	-	ENSSSCT00000027138	ENSSSCG00000008687	MXD4	MAX dimerization protein 4 [Source:HGNC Symbol;Acc:HGNC:13906]	697975	708539	-	7611	downstream
chr8	ALDBSSCT0000010725	ALDBSSCG0000006491	--	Annotated_lncRNA	946562	952275	-	ENSSSCT00000009507	ENSSSCG00000008690	RNF4	ring finger protein 4 [Source:HGNC Symbol;Acc:HGNC:10067]	918502	944201	+	2360	downstream
chr8	ALDBSSCT0000010727	ALDBSSCG0000006491	--	Annotated_lncRNA	946562	952314	-	ENSSSCT00000009507	ENSSSCG00000008690	RNF4	ring finger protein 4 [Source:HGNC Symbol;Acc:HGNC:10067]	918502	944201	+	2360	downstream
chr8	ALDBSSCT0000010729	ALDBSSCG0000006491	--	Annotated_lncRNA	946562	952538	-	ENSSSCT00000009507	ENSSSCG00000008690	RNF4	ring finger protein 4 [Source:HGNC Symbol;Acc:HGNC:10067]	918502	944201	+	2360	downstream
chr14	LNC_000882	XLOC_052183	--	Novel_lncRNA	108498586	108506275	-	ENSSSCT00000011420	ENSSSCG00000010435	MINPP1	multiple inositol-polyphosphate phosphatase 1 [Source:HGNC Symbol;Acc:HGNC:7102]	108506965	108560998	+	689	upstream
chr14	LNC_000883	XLOC_052356	--	Novel_lncRNA	116329700	116333689	-	ENSSSCT00000022686	ENSSSCG00000026798	CYP2C42	-	116299374	116337991	+	-3990	antisense
chr14	LNC_000881	XLOC_052183	--	Novel_lncRNA	108460385	108506931	-	ENSSSCT00000011420	ENSSSCG00000010435	MINPP1	multiple inositol-polyphosphate phosphatase 1 [Source:HGNC Symbol;Acc:HGNC:7102]	108506965	108560998	+	33	upstream
chr14	LNC_000888	XLOC_052506	--	Novel_lncRNA	120477891	120487224	-	ENSSSCT00000011535	ENSSSCG00000010544	DNMBP	dynamin binding protein [Source:HGNC Symbol;Acc:HGNC:30373]	120489410	120614793	-	2185	downstream
chr14	LNC_000888	XLOC_052506	--	Novel_lncRNA	120477891	120487224	-	ENSSSCT00000011534	ENSSSCG00000010543	ABCC2	ATP binding cassette subfamily C member 2 [Source:HGNC Symbol;Acc:HGNC:53]	120400796	120478568	+	-678	antisense
chr14	LNC_000889	XLOC_052506	--	Novel_lncRNA	120477891	120487224	-	ENSSSCT00000011535	ENSSSCG00000010544	DNMBP	dynamin binding protein [Source:HGNC Symbol;Acc:HGNC:30373]	120489410	120614793	-	2185	downstream
chr14	LNC_000889	XLOC_052506	--	Novel_lncRNA	120477891	120487224	-	ENSSSCT00000011534	ENSSSCG00000010543	ABCC2	ATP binding cassette subfamily C member 2 [Source:HGNC Symbol;Acc:HGNC:53]	120400796	120478568	+	-678	antisense
chr6	ALDBSSCT0000009541	ALDBSSCG0000005815	--	Annotated_lncRNA	137323696	137326337	-	ENSSSCT00000004221	ENSSSCG00000003814	EFCAB7	EF-hand calcium binding domain 7 [Source:HGNC Symbol;Acc:HGNC:29379]	137259293	137316747	-	6948	upstream
chr7	ALDBSSCT0000009992	ALDBSSCG0000006078	--	Annotated_lncRNA	132103504	132106541	+	ENSSSCT00000024755	ENSSSCG00000020958	--	--	132100443	132101744	-	1759	upstream
chr7	ALDBSSCT0000009992	ALDBSSCG0000006078	--	Annotated_lncRNA	132103504	132106541	+	ENSSSCT00000002858	ENSSSCG00000002573	--	--	132097258	132100352	-	3151	upstream
chr9	ALDBSSCT0000011454	ALDBSSCG0000006969	--	Annotated_lncRNA	19134172	19136429	-	ENSSSCT00000016255	ENSSSCG00000014900	RAB30	RAB30, member RAS oncogene family [Source:HGNC Symbol;Acc:HGNC:9770]	19117863	19130117	+	4054	downstream
chr10	ALDBSSCT0000001396	ALDBSSCG0000000849	--	Annotated_lncRNA	10988002	11028122	-	ENSSSCT00000011834	ENSSSCG00000010817	LYPLAL1	lysophospholipase like 1 [Source:HGNC Symbol;Acc:HGNC:20440]	11029409	11060723	+	1286	upstream
chr9	ALDBSSCT0000011033	ALDBSSCG0000006695	--	Annotated_lncRNA	65460	66764	+	ENSSSCT00000032233	ENSSSCG00000022070	ZNF143	zinc finger protein 143 [Source:HGNC Symbol;Acc:HGNC:12928]	71142	114736	+	4377	upstream
chr6	ALDBSSCT0000009045	ALDBSSCG0000005523	--	Annotated_lncRNA	110652537	110734909	+	ENSSSCT00000024859	ENSSSCG00000028047	--	--	110739417	110858569	-	4507	downstream
chr7	ALDBSSCT0000009689	ALDBSSCG0000005913	--	Annotated_lncRNA	27236122	27239222	+	ENSSSCT00000001518	ENSSSCG00000001394	MIC-2	-	27223010	27229254	-	6867	upstream
chr7	ALDBSSCT0000009689	ALDBSSCG0000005913	--	Annotated_lncRNA	27236122	27239222	+	ENSSSCT00000035608	ENSSSCG00000001394	MIC-2	-	27227579	27233917	-	2204	upstream
chr4	ALDBSSCT0000007525	ALDBSSCG0000004566	--	Annotated_lncRNA	45019813	45038084	+	ENSSSCT00000027714	ENSSSCG00000023609	TP53INP1	tumor protein p53 inducible nuclear protein 1 [Source:HGNC Symbol;Acc:HGNC:18022]	45000113	45019079	+	733	downstream
chr7	ALDBSSCT0000009680	ALDBSSCG0000005906	--	Annotated_lncRNA	22289224	22289674	+	ENSSSCT00000001227	ENSSSCG00000001131	--	--	22275360	22288678	+	545	downstream
chr15	ALDBSSCT0000004261	ALDBSSCG0000002580	--	Annotated_lncRNA	96355403	96514544	+	ENSSSCT00000017431	ENSSSCG00000016009	ITGA4	integrin subunit alpha 4 [Source:HGNC Symbol;Acc:HGNC:6140]	96521134	96603831	+	6589	upstream
GL892447.1	LNC_000009	XLOC_000660	--	Novel_lncRNA	45413	46480	-	ENSSSCT00000030370	ENSSSCG00000021371	ZNF300	zinc finger protein 300 [Source:HGNC Symbol;Acc:HGNC:13091]	33602	45324	-	88	upstream
chr9	ALDBSSCT0000011083	ALDBSSCG0000006725	--	Annotated_lncRNA	10956025	10964155	+	ENSSSCT00000016211	ENSSSCG00000014859	--	--	10972133	10976532	+	7977	upstream
chr13	LNC_000666	XLOC_039476	--	Novel_lncRNA	49987784	49993158	+	ENSSSCT00000012577	ENSSSCG00000011494	--	--	49972522	49978066	-	9717	upstream
chr13	LNC_000666	XLOC_039476	--	Novel_lncRNA	49987784	49993158	+	ENSSSCT00000026325	ENSSSCG00000025202	--	--	49993011	49999769	-	-148	antisense
chr13	LNC_000667	XLOC_039476	--	Novel_lncRNA	49987839	49993158	+	ENSSSCT00000012577	ENSSSCG00000011494	--	--	49972522	49978066	-	9772	upstream
chr13	LNC_000667	XLOC_039476	--	Novel_lncRNA	49987839	49993158	+	ENSSSCT00000026325	ENSSSCG00000025202	--	--	49993011	49999769	-	-148	antisense
chr13	LNC_000664	XLOC_039399	--	Novel_lncRNA	44127890	44158502	+	ENSSSCT00000022684	ENSSSCG00000025881	PDHB	pyruvate dehydrogenase (lipoamide) beta [Source:HGNC Symbol;Acc:HGNC:8808]	44121614	44127858	-	31	upstream
chr13	LNC_000664	XLOC_039399	--	Novel_lncRNA	44127890	44158502	+	ENSSSCT00000012556	ENSSSCG00000011474	PXK	PX domain containing serine/threonine kinase like [Source:HGNC Symbol;Acc:HGNC:23326]	44039516	44120693	+	7196	downstream
chr13	LNC_000662	XLOC_039230	--	Novel_lncRNA	36961423	36965527	+	ENSSSCT00000012497	ENSSSCG00000011417	DCAF1	DDB1 and CUL4 associated factor 1 [Source:HGNC Symbol;Acc:HGNC:30911]	36900717	36961167	-	255	upstream
chr13	LNC_000663	XLOC_039238	--	Novel_lncRNA	37184474	37213830	+	ENSSSCT00000032558	ENSSSCG00000024835	IQCF6	IQ motif containing F6 [Source:HGNC Symbol;Acc:HGNC:35158]	37188984	37189446	-	-463	antisense
chr13	LNC_000663	XLOC_039238	--	Novel_lncRNA	37184474	37213830	+	ENSSSCT00000025976	ENSSSCG00000027192	IQCF3	IQ motif containing F3 [Source:HGNC Symbol;Acc:HGNC:31816]	37219108	37220446	+	5277	upstream
chr6	ALDBSSCT0000008936	ALDBSSCG0000005466	--	Annotated_lncRNA	74600323	74606854	+	ENSSSCT00000003915	ENSSSCG00000003524	C1QA	complement component 1, q subcomponent, A chain [Source:HGNC Symbol;Acc:HGNC:1241]	74609912	74612993	+	3057	upstream
chr6	ALDBSSCT0000008936	ALDBSSCG0000005466	--	Annotated_lncRNA	74600323	74606854	+	ENSSSCT00000003916	ENSSSCG00000003525	C1QC	complement component 1, q subcomponent, C chain [Source:HGNC Symbol;Acc:HGNC:1245]	74616233	74621248	+	9378	upstream
chr6	ALDBSSCT0000008933	ALDBSSCG0000005464	--	Annotated_lncRNA	73950841	73958329	+	ENSSSCT00000003907	ENSSSCG00000003517	--	--	73962559	73972414	-	4229	downstream
chr6	ALDBSSCT0000008933	ALDBSSCG0000005464	--	Annotated_lncRNA	73950841	73958329	+	ENSSSCT00000003904	ENSSSCG00000003514	--	--	73920982	73947323	+	3517	downstream
chr6	ALDBSSCT0000008933	ALDBSSCG0000005464	--	Annotated_lncRNA	73950841	73958329	+	ENSSSCT00000031124	ENSSSCG00000025626	--	--	73960120	73961429	-	1790	downstream
chr13	ALDBSSCT0000003174	ALDBSSCG0000001910	--	Annotated_lncRNA	73148368	73153144	-	ENSSSCT00000012642	ENSSSCG00000011552	ARPC4	actin related protein 2/3 complex, subunit 4 [Source:RefSeq peptide;Acc:NP_001193464]	73159045	73164638	+	5900	upstream
chr13	ALDBSSCT0000003174	ALDBSSCG0000001910	--	Annotated_lncRNA	73148368	73153144	-	ENSSSCT00000012637	ENSSSCG00000011547	--	--	73136411	73147479	-	888	upstream
chr5	LNC_001591	XLOC_092889	--	Novel_lncRNA	84429178	84470612	-	ENSSSCT00000000931	ENSSSCG00000000854	--	--	84334737	84425007	+	4170	downstream
chr2	ALDBSSCT0000005808	ALDBSSCG0000003528	--	Annotated_lncRNA	9689967	9693663	+	ENSSSCT00000014304	ENSSSCG00000013086	CYB561A3	cytochrome b561 family member A3 [Source:HGNC Symbol;Acc:HGNC:23014]	9694930	9703036	+	1266	upstream
chr2	ALDBSSCT0000005808	ALDBSSCG0000003528	--	Annotated_lncRNA	9689967	9693663	+	ENSSSCT00000014303	ENSSSCG00000013085	TMEM138	transmembrane protein 138 [Source:HGNC Symbol;Acc:HGNC:26944]	9681752	9687560	-	2406	upstream
chr9	ALDBSSCT0000011084	ALDBSSCG0000006726	--	Annotated_lncRNA	10966570	10971281	+	ENSSSCT00000016211	ENSSSCG00000014859	--	--	10972133	10976532	+	851	upstream
chr5	ALDBSSCT0000008482	ALDBSSCG0000005157	--	Annotated_lncRNA	3175300	3176464	-	ENSSSCT00000034350	ENSSSCG00000000031	MCAT	malonyl-CoA-acyl carrier protein transacylase [Source:HGNC Symbol;Acc:HGNC:29622]	3164877	3172820	+	2479	downstream
chr5	ALDBSSCT0000008482	ALDBSSCG0000005157	--	Annotated_lncRNA	3175300	3176464	-	ENSSSCT00000000033	ENSSSCG00000000031	MCAT	malonyl-CoA-acyl carrier protein transacylase [Source:HGNC Symbol;Acc:HGNC:29622]	3164816	3172818	+	2481	downstream
chr5	ALDBSSCT0000008483	ALDBSSCG0000005158	--	Annotated_lncRNA	3804218	3804725	-	ENSSSCT00000000051	ENSSSCG00000000046	CYP2D25	-	3810426	3815076	-	5700	downstream
chr4	ALDBSSCT0000007669	ALDBSSCG0000004659	--	Annotated_lncRNA	110270029	110278677	+	ENSSSCT00000007343	ENSSSCG00000006704	--	--	110281179	110293011	-	2501	downstream
chrX	ENSSSCT00000033052	ENSSSCG00000031028	CH242-15C8.2	Annotated_lncRNA	41061659	41063153	+	ENSSSCT00000013397	ENSSSCG00000012251	USP9X	ubiquitin specific peptidase 9, X-linked [Source:HGNC Symbol;Acc:HGNC:12632]	41007301	41060997	+	661	downstream
chr4	ALDBSSCT0000007661	ALDBSSCG0000004651	--	Annotated_lncRNA	106488186	106495413	+	ENSSSCT00000031582	ENSSSCG00000028343	MRPL9	mitochondrial ribosomal protein L9 [Source:HGNC Symbol;Acc:HGNC:14277]	106471063	106487372	+	813	downstream
chr4	ALDBSSCT0000007667	ALDBSSCG0000004657	--	Annotated_lncRNA	109080998	109083204	+	ENSSSCT00000007327	ENSSSCG00000006688	ANKRD35	ankyrin repeat domain 35 [Source:HGNC Symbol;Acc:HGNC:26323]	109085351	109102969	+	2146	upstream
chr13	ALDBSSCT0000003319	ALDBSSCG0000001998	--	Annotated_lncRNA	149272126	149274162	-	ENSSSCT00000013004	ENSSSCG00000011887	--	--	149282932	149288096	-	8769	downstream
chr13	ALDBSSCT0000003314	ALDBSSCG0000001994	--	Annotated_lncRNA	146709329	146714480	-	ENSSSCT00000023567	ENSSSCG00000024904	--	--	146718997	146740647	-	4516	downstream
chr6	ALDBSSCT0000008802	ALDBSSCG0000005376	--	Annotated_lncRNA	39774940	39777125	+	ENSSSCT00000003179	ENSSSCG00000002877	-	zinc finger protein 181 [Source:RefSeq peptide;Acc:NP_001231747]	39781110	39785657	+	3984	upstream
chr3	ALDBSSCT0000007147	ALDBSSCG0000004347	--	Annotated_lncRNA	48147723	48150246	-	ENSSSCT00000008890	ENSSSCG00000008114	--	--	48138885	48143316	-	4406	upstream
chr6	ALDBSSCT0000008808	ALDBSSCG0000005379	--	Annotated_lncRNA	40222776	40224902	+	ENSSSCT00000003190	ENSSSCG00000002887	MAG	myelin associated glycoprotein [Source:HGNC Symbol;Acc:HGNC:6783]	40216765	40221043	+	1732	downstream
chr6	ALDBSSCT0000008808	ALDBSSCG0000005379	--	Annotated_lncRNA	40222776	40224902	+	ENSSSCT00000003185	ENSSSCG00000002883	DMKN	dermokine [Source:HGNC Symbol;Acc:HGNC:25063]	40230657	40243498	+	5754	upstream
chr6	ALDBSSCT0000008808	ALDBSSCG0000005379	--	Annotated_lncRNA	40222776	40224902	+	ENSSSCT00000028781	ENSSSCG00000002883	DMKN	dermokine [Source:HGNC Symbol;Acc:HGNC:25063]	40230657	40243498	+	5754	upstream
chr4	ALDBSSCT0000007639	ALDBSSCG0000004635	--	Annotated_lncRNA	100769977	100782327	+	ENSSSCT00000007072	ENSSSCG00000006456	FCRL1	Fc receptor like 1 [Source:HGNC Symbol;Acc:HGNC:18509]	100760769	100769333	+	643	downstream
chr12	ALDBSSCT0000002225	ALDBSSCG0000001336	--	Annotated_lncRNA	32823580	32826316	+	ENSSSCT00000029457	ENSSSCG00000025681	--	--	32830676	32861189	+	4359	upstream
chr12	ALDBSSCT0000002315	ALDBSSCG0000001398	--	Annotated_lncRNA	177689	182188	-	ENSSSCT00000033863	ENSSSCG00000017125	FOXK2	forkhead box K2 [Source:HGNC Symbol;Acc:HGNC:6036]	121884	174817	+	2871	downstream
chr12	ALDBSSCT0000002315	ALDBSSCG0000001398	--	Annotated_lncRNA	177689	182188	-	ENSSSCT00000018643	ENSSSCG00000017125	FOXK2	forkhead box K2 [Source:HGNC Symbol;Acc:HGNC:6036]	121884	176867	+	821	downstream
chr12	ALDBSSCT0000002315	ALDBSSCG0000001398	--	Annotated_lncRNA	177689	182188	-	ENSSSCT00000018651	ENSSSCG00000017133	WDR45B	WD repeat domain 45B [Source:HGNC Symbol;Acc:HGNC:25072]	190348	215261	-	8159	downstream
chr12	ALDBSSCT0000002315	ALDBSSCG0000001398	--	Annotated_lncRNA	177689	182188	-	ENSSSCT00000036538	ENSSSCG00000017125	FOXK2	forkhead box K2 [Source:HGNC Symbol;Acc:HGNC:6036]	162778	174198	+	3490	downstream
chr12	ALDBSSCT0000002312	ALDBSSCG0000001396	--	Annotated_lncRNA	62923768	62926303	+	ENSSSCT00000019643	ENSSSCG00000018048	--	--	62935025	62950226	+	8721	upstream
chr12	ALDBSSCT0000002312	ALDBSSCG0000001396	--	Annotated_lncRNA	62923768	62926303	+	ENSSSCT00000019644	ENSSSCG00000018049	--	--	62850793	62923098	+	669	downstream
chr15	ALDBSSCT0000004441	ALDBSSCG0000002705	--	Annotated_lncRNA	51511646	51530545	-	ENSSSCT00000027059	ENSSSCG00000015779	CDKN2AIP	CDKN2A interacting protein [Source:HGNC Symbol;Acc:HGNC:24325]	51499660	51502685	+	8960	downstream
chr15	ALDBSSCT0000004441	ALDBSSCG0000002705	--	Annotated_lncRNA	51511646	51530545	-	ENSSSCT00000017180	ENSSSCG00000015779	CDKN2AIP	CDKN2A interacting protein [Source:HGNC Symbol;Acc:HGNC:24325]	51499660	51503186	+	8459	downstream
chr15	ALDBSSCT0000004441	ALDBSSCG0000002705	--	Annotated_lncRNA	51511646	51530545	-	ENSSSCT00000025252	ENSSSCG00000024555	ING2	inhibitor of growth family member 2 [Source:HGNC Symbol;Acc:HGNC:6063]	51531447	51539330	+	901	upstream
chr12	ALDBSSCT0000002310	ALDBSSCG0000001394	--	Annotated_lncRNA	62336907	62340596	+	ENSSSCT00000019629	ENSSSCG00000018034	--	--	62326863	62334572	+	2334	downstream
chr12	ALDBSSCT0000002310	ALDBSSCG0000001394	--	Annotated_lncRNA	62336907	62340596	+	ENSSSCT00000019630	ENSSSCG00000018035	PIGL	phosphatidylinositol glycan anchor biosynthesis class L [Source:HGNC Symbol;Acc:HGNC:8966]	62343359	62381926	-	2762	downstream
chr15	ALDBSSCT0000004443	ALDBSSCG0000002707	--	Annotated_lncRNA	51587842	51588907	-	ENSSSCT00000017177	ENSSSCG00000015776	RWDD4	RWD domain containing 4 [Source:HGNC Symbol;Acc:HGNC:23750]	51592235	51604510	-	3327	downstream
chr4	ALDBSSCT0000008157	ALDBSSCG0000004952	--	Annotated_lncRNA	132878183	132916173	-	ENSSSCT00000007534	ENSSSCG00000006880	--	--	132865301	132875990	+	2192	downstream
chr4	ALDBSSCT0000008154	ALDBSSCG0000004950	--	Annotated_lncRNA	130866666	130871772	-	ENSSSCT00000007531	ENSSSCG00000006877	--	--	130763759	130857116	-	9549	upstream
chr3	ALDBSSCT0000007143	ALDBSSCG0000004345	--	Annotated_lncRNA	47943074	47952102	-	ENSSSCT00000008887	ENSSSCG00000008111	NPHP1	nephrocystin 1 [Source:HGNC Symbol;Acc:HGNC:7905]	47952751	48013075	-	648	downstream
chr3	ALDBSSCT0000007143	ALDBSSCG0000004345	--	Annotated_lncRNA	47943074	47952102	-	ENSSSCT00000035691	ENSSSCG00000008111	NPHP1	nephrocystin 1 [Source:HGNC Symbol;Acc:HGNC:7905]	47952796	48013089	-	693	downstream
GL896324.1	ALDBSSCT0000011853	ALDBSSCG0000007202	--	Annotated_lncRNA	46204	47110	+	ENSSSCT00000022716	ENSSSCG00000026731	CEP85	centrosomal protein 85 [Source:HGNC Symbol;Acc:HGNC:25309]	16972	44055	+	2148	downstream
GL896324.1	ALDBSSCT0000011853	ALDBSSCG0000007202	--	Annotated_lncRNA	46204	47110	+	ENSSSCT00000023711	ENSSSCG00000024368	--	--	51195	58781	-	4084	downstream
GL896302.1	ALDBSSCT0000011852	ALDBSSCG0000007201	--	Annotated_lncRNA	108889	110179	-	ENSSSCT00000022463	ENSSSCG00000029900	DMPK	dystrophia myotonica protein kinase [Source:HGNC Symbol;Acc:HGNC:2933]	110788	119908	-	608	downstream
chr12	ALDBSSCT0000002138	ALDBSSCG0000001281	--	Annotated_lncRNA	4675035	4708882	+	ENSSSCT00000024695	ENSSSCG00000022373	JMJD6	arginine demethylase and lysine hydroxylase [Source:HGNC Symbol;Acc:HGNC:19355]	4661014	4667748	+	7286	downstream
chr3	LNC_001360	XLOC_080640	--	Novel_lncRNA	90502375	90512999	-	ENSSSCT00000009197	ENSSSCG00000008400	CFAP36	cilia and flagella associated protein 36 [Source:HGNC Symbol;Acc:HGNC:30540]	90513400	90543451	+	400	upstream
chr14	ALDBSSCT0000003958	ALDBSSCG0000002385	--	Annotated_lncRNA	70773051	70773782	-	ENSSSCT00000011186	ENSSSCG00000010220	--	--	70775407	70775796	-	1624	downstream
chr18	LNC_001101	XLOC_066288	--	Novel_lncRNA	45822027	45830257	+	ENSSSCT00000018149	ENSSSCG00000016670	PPP1R17	protein phosphatase 1 regulatory subunit 17 [Source:HGNC Symbol;Acc:HGNC:16973]	45799687	45818403	+	3623	downstream
chr18	LNC_001102	XLOC_066288	--	Novel_lncRNA	45822466	45830257	+	ENSSSCT00000018149	ENSSSCG00000016670	PPP1R17	protein phosphatase 1 regulatory subunit 17 [Source:HGNC Symbol;Acc:HGNC:16973]	45799687	45818403	+	4062	downstream
chr18	LNC_001103	XLOC_066301	--	Novel_lncRNA	46768619	46777279	+	ENSSSCT00000018157	ENSSSCG00000016677	GARS	glycyl-tRNA synthetase [Source:HGNC Symbol;Acc:HGNC:4162]	46675442	46768425	-	193	upstream
chr18	LNC_001106	XLOC_066715	--	Novel_lncRNA	5388633	5400366	-	ENSSSCT00000029123	ENSSSCG00000028615	--	--	5402347	5408431	+	1980	upstream
chr17	ALDBSSCT0000005338	ALDBSSCG0000003228	--	Annotated_lncRNA	37473921	37482813	-	ENSSSCT00000007852	ENSSSCG00000007178	SNRPB	small nuclear ribonucleoprotein polypeptides B and B1 [Source:HGNC Symbol;Acc:HGNC:11153]	37461258	37468981	-	4939	upstream
chr1	LNC_000406	XLOC_025323	--	Novel_lncRNA	200589521	200589952	-	ENSSSCT00000005536	ENSSSCG00000005020	--	--	200589507	200695217	+	-432	antisense
chr1	LNC_000407	XLOC_025326	--	Novel_lncRNA	200880181	200909384	-	ENSSSCT00000005538	ENSSSCG00000005022	NIN	ninein [Source:HGNC Symbol;Acc:HGNC:14906]	200774577	200871792	-	8388	upstream
chr1	LNC_000407	XLOC_025326	--	Novel_lncRNA	200880181	200909384	-	ENSSSCT00000032295	ENSSSCG00000005022	NIN	ninein [Source:HGNC Symbol;Acc:HGNC:14906]	200781227	200871792	-	8388	upstream
chr1	LNC_000404	XLOC_025033	--	Novel_lncRNA	179163852	179184923	-	ENSSSCT00000005415	ENSSSCG00000004908	LMAN1	lectin, mannose binding 1 [Source:HGNC Symbol;Acc:HGNC:6631]	179185031	179206074	+	107	upstream
chr1	LNC_000403	XLOC_024951	--	Novel_lncRNA	176239470	176240786	-	ENSSSCT00000005402	ENSSSCG00000004896	PHLPP1	PH domain and leucine rich repeat protein phosphatase 1 [Source:HGNC Symbol;Acc:HGNC:20610]	176119417	176234934	-	4535	upstream
chr6	ALDBSSCT0000009358	ALDBSSCG0000005711	--	Annotated_lncRNA	56802933	56804760	-	ENSSSCT00000004407	ENSSSCG00000003985	--	--	56812059	56829002	-	7298	downstream
chr1	LNC_000408	XLOC_025349	--	Novel_lncRNA	201703890	201721253	-	ENSSSCT00000005543	ENSSSCG00000005027	FRMD6	FERM domain containing 6 [Source:HGNC Symbol;Acc:HGNC:19839]	201656074	201698202	+	5687	downstream
chr3	ALDBSSCT0000007243	ALDBSSCG0000004393	--	Annotated_lncRNA	84691366	84694560	-	ENSSSCT00000009183	ENSSSCG00000008386	--	--	84698896	84727009	-	4335	downstream
chr2	ALDBSSCT0000005943	ALDBSSCG0000003631	--	Annotated_lncRNA	83318900	83330363	+	ENSSSCT00000015360	ENSSSCG00000014061	THOC3	THO complex 3 [Source:HGNC Symbol;Acc:HGNC:19072]	83306550	83318165	+	734	downstream
chr2	ALDBSSCT0000006331	ALDBSSCG0000003873	--	Annotated_lncRNA	78646981	78648650	-	ENSSSCT00000024113	ENSSSCG00000027864	--	--	78649327	78656605	-	676	downstream
chr11	ALDBSSCT0000002042	ALDBSSCG0000001232	--	Annotated_lncRNA	78372544	78376542	-	ENSSSCT00000010448	ENSSSCG00000009530	--	--	78361372	78368847	-	3696	upstream
chr11	ALDBSSCT0000002042	ALDBSSCG0000001232	--	Annotated_lncRNA	78372544	78376542	-	ENSSSCT00000010449	ENSSSCG00000009531	--	--	78369216	78371621	-	922	upstream
chr6	ALDBSSCT0000009353	ALDBSSCG0000005707	--	Annotated_lncRNA	56163372	56165498	-	ENSSSCT00000031892	ENSSSCG00000026141	ZNF71	zinc finger protein 71 [Source:HGNC Symbol;Acc:HGNC:13141]	56148963	56159821	-	3550	upstream
chr2	ALDBSSCT0000005795	ALDBSSCG0000003520	--	Annotated_lncRNA	7041010	7042905	+	ENSSSCT00000027308	ENSSSCG00000021620	STIP1	stress induced phosphoprotein 1 [Source:HGNC Symbol;Acc:HGNC:11387]	6978383	7040372	-	637	upstream
chr1	ALDBSSCT0000001036	ALDBSSCG0000000640	--	Annotated_lncRNA	286247183	286248731	-	ENSSSCT00000006038	ENSSSCG00000005492	TMEM268	transmembrane protein 268 [Source:HGNC Symbol;Acc:HGNC:24513]	286220699	286241331	-	5851	upstream
chr1	ALDBSSCT0000001036	ALDBSSCG0000000640	--	Annotated_lncRNA	286247183	286248731	-	ENSSSCT00000006037	ENSSSCG00000005491	--	--	286250323	286253598	-	1591	downstream
chr1	ALDBSSCT0000001035	ALDBSSCG0000000639	--	Annotated_lncRNA	284505334	284511948	-	ENSSSCT00000006021	ENSSSCG00000005475	ZFP37	ZFP37 zinc finger protein [Source:HGNC Symbol;Acc:HGNC:12863]	284520493	284538894	-	8544	downstream
chr1	LNC_000318	XLOC_018731	--	Novel_lncRNA	143528079	143534799	+	ENSSSCT00000005211	ENSSSCG00000004719	CDAN1	codanin 1 [Source:HGNC Symbol;Acc:HGNC:1713]	143535527	143550381	+	727	upstream
chr2	LNC_001211	XLOC_072448	--	Novel_lncRNA	30883961	30899923	-	ENSSSCT00000014542	ENSSSCG00000013316	WT1	Wilms tumor 1 [Source:HGNC Symbol;Acc:HGNC:12796]	30902193	30945293	+	2269	upstream
chr2	LNC_001211	XLOC_072448	--	Novel_lncRNA	30883961	30899923	-	ENSSSCT00000027177	ENSSSCG00000013316	WT1	Wilms tumor 1 [Source:HGNC Symbol;Acc:HGNC:12796]	30902193	30945293	+	2269	upstream
chr2	LNC_001212	XLOC_072636	--	Novel_lncRNA	39928441	39939004	-	ENSSSCT00000023876	ENSSSCG00000022254	--	--	39931759	39931977	+	-219	antisense
chr2	LNC_001212	XLOC_072636	--	Novel_lncRNA	39928441	39939004	-	ENSSSCT00000029550	ENSSSCG00000022838	SVIP	small VCP interacting protein [Source:HGNC Symbol;Acc:HGNC:25238]	39939040	39942228	-	35	downstream
chr1	LNC_000313	XLOC_018439	--	Novel_lncRNA	126393975	126425674	+	ENSSSCT00000027727	ENSSSCG00000030605	POLR2M	RNA polymerase II subunit M [Source:HGNC Symbol;Acc:HGNC:14862]	126383470	126393930	-	44	upstream
chr1	LNC_000311	XLOC_018289	--	Novel_lncRNA	118838219	118843653	+	ENSSSCT00000005033	ENSSSCG00000004556	--	--	118816807	118837774	+	444	downstream
chr2	LNC_001218	XLOC_073467	--	Novel_lncRNA	71588038	71607372	-	ENSSSCT00000014844	ENSSSCG00000013592	ELAVL1	ELAV like RNA binding protein 1 [Source:HGNC Symbol;Acc:HGNC:3312]	71607470	71646401	+	97	upstream
chr2	LNC_001218	XLOC_073467	--	Novel_lncRNA	71588038	71607372	-	ENSSSCT00000014845	ENSSSCG00000013593	CCL25	C-C motif chemokine ligand 25 [Source:HGNC Symbol;Acc:HGNC:10624]	71575448	71578911	-	9126	upstream
chr2	LNC_001219	XLOC_073534	--	Novel_lncRNA	74930229	74934153	-	ENSSSCT00000014754	ENSSSCG00000013507	MPND	MPN domain containing [Source:HGNC Symbol;Acc:HGNC:25934]	74935875	74948872	-	1721	downstream
chr2	LNC_001219	XLOC_073534	--	Novel_lncRNA	74930229	74934153	-	ENSSSCT00000014755	ENSSSCG00000013508	SH3GL1	SH3 domain containing GRB2 like 1, endophilin A2 [Source:HGNC Symbol;Acc:HGNC:10830]	74907426	74938401	+	-3925	antisense
chr1	LNC_000314	XLOC_018439	--	Novel_lncRNA	126393989	126443750	+	ENSSSCT00000027727	ENSSSCG00000030605	POLR2M	RNA polymerase II subunit M [Source:HGNC Symbol;Acc:HGNC:14862]	126383470	126393930	-	58	upstream
chr1	LNC_000315	XLOC_018439	--	Novel_lncRNA	126415588	126423854	+	ENSSSCT00000005079	ENSSSCG00000004598	MYZAP	myocardial zonula adherens protein [Source:HGNC Symbol;Acc:HGNC:43444]	126414879	126509527	-	-8267	antisense
chr8	LNC_001840	XLOC_109344	--	Novel_lncRNA	10616985	10635226	-	ENSSSCT00000009562	ENSSSCG00000008740	FBXL5	F-box and leucine rich repeat protein 5 [Source:HGNC Symbol;Acc:HGNC:13602]	10562901	10609521	-	7463	upstream
chr9	ALDBSSCT0000011702	ALDBSSCG0000007106	--	Annotated_lncRNA	134651174	134669821	-	ENSSSCT00000016929	ENSSSCG00000015540	MR1	major histocompatibility complex, class I-related [Source:HGNC Symbol;Acc:HGNC:4975]	134637147	134643117	+	8056	downstream
chr10	ALDBSSCT0000001143	ALDBSSCG0000000707	--	Annotated_lncRNA	16862788	16869950	+	ENSSSCT00000011882	ENSSSCG00000010860	PSEN2	presenilin 2 [Source:HGNC Symbol;Acc:HGNC:9509]	16874589	16891790	+	4638	upstream
chr10	ALDBSSCT0000001140	ALDBSSCG0000000704	--	Annotated_lncRNA	14879713	14880881	+	ENSSSCT00000032127	ENSSSCG00000025686	KMO	kynurenine 3-monooxygenase [Source:HGNC Symbol;Acc:HGNC:6381]	14889942	14937373	+	9060	upstream
chr10	ALDBSSCT0000001140	ALDBSSCG0000000704	--	Annotated_lncRNA	14879713	14880881	+	ENSSSCT00000030683	ENSSSCG00000028178	FH	fumarate hydratase [Source:RefSeq peptide;Acc:NP_001230517]	14852719	14879014	-	698	upstream
chr1	ALDBSSCT0000000915	ALDBSSCG0000000561	--	Annotated_lncRNA	207097049	207102386	-	ENSSSCT00000005581	ENSSSCG00000005064	NAA30	N(alpha)-acetyltransferase 30, NatC catalytic subunit [Source:HGNC Symbol;Acc:HGNC:19844]	207103162	207112320	+	775	upstream
chr11	ALDBSSCT0000001965	ALDBSSCG0000001184	--	Annotated_lncRNA	24670348	24671751	-	ENSSSCT00000010334	ENSSSCG00000009427	DNAJC15	DnaJ heat shock protein family (Hsp40) member C15 [Source:HGNC Symbol;Acc:HGNC:20325]	24609055	24668058	-	2289	upstream
chr3	ALDBSSCT0000006946	ALDBSSCG0000004218	--	Annotated_lncRNA	135776733	135778771	+	ENSSSCT00000009457	ENSSSCG00000008644	--	--	135751097	135775896	+	836	downstream
chr8	LNC_001854	XLOC_109977	--	Novel_lncRNA	41145935	41159333	-	ENSSSCT00000009666	ENSSSCG00000008831	DCUN1D4	defective in cullin neddylation 1 domain containing 4 [Source:HGNC Symbol;Acc:HGNC:28998]	41159617	41236217	+	283	upstream
chr8	LNC_001855	XLOC_110354	--	Novel_lncRNA	71268789	71295886	-	ENSSSCT00000009789	ENSSSCG00000008937	AMBN	Ameloblastin [Source:UniProtKB/Swiss-Prot;Acc:Q28989]	71288922	71302169	+	-6965	antisense
chr8	LNC_001852	XLOC_109977	--	Novel_lncRNA	41123385	41159334	-	ENSSSCT00000009664	ENSSSCG00000008830	CWH43	cell wall biogenesis 43 C-terminal homolog [Source:HGNC Symbol;Acc:HGNC:26133]	41045873	41120417	+	2967	downstream
chr8	LNC_001852	XLOC_109977	--	Novel_lncRNA	41123385	41159334	-	ENSSSCT00000009666	ENSSSCG00000008831	DCUN1D4	defective in cullin neddylation 1 domain containing 4 [Source:HGNC Symbol;Acc:HGNC:28998]	41159617	41236217	+	282	upstream
chr8	LNC_001853	XLOC_109977	--	Novel_lncRNA	41136415	41159388	-	ENSSSCT00000009666	ENSSSCG00000008831	DCUN1D4	defective in cullin neddylation 1 domain containing 4 [Source:HGNC Symbol;Acc:HGNC:28998]	41159617	41236217	+	228	upstream
chr8	LNC_001850	XLOC_109950	--	Novel_lncRNA	39275295	39279004	-	ENSSSCT00000025719	ENSSSCG00000021137	GABRB1	gamma-aminobutyric acid type A receptor beta1 subunit [Source:HGNC Symbol;Acc:HGNC:4081]	39254225	39275411	+	-117	antisense
chr8	LNC_001842	XLOC_109413	--	Novel_lncRNA	12555180	12559619	-	ENSSSCT00000009570	ENSSSCG00000008747	NCAPG	non-SMC condensin I complex subunit G [Source:HGNC Symbol;Acc:HGNC:24304]	12560087	12607267	+	467	upstream
chr7	ALDBSSCT0000010153	ALDBSSCG0000006181	--	Annotated_lncRNA	43243962	43247498	-	ENSSSCT00000001826	ENSSSCG00000026741	TBCC	tubulin folding cofactor C [Source:RefSeq peptide;Acc:NP_001245336]	43248740	43249774	-	1241	downstream
chr10	ALDBSSCT0000001497	ALDBSSCG0000000908	--	Annotated_lncRNA	37341265	37357171	-	ENSSSCT00000012033	ENSSSCG00000010992	--	--	37361493	37376617	+	4321	upstream
chr4	ALDBSSCT0000008100	ALDBSSCG0000004915	--	Annotated_lncRNA	113095857	113096844	-	ENSSSCT00000007371	ENSSSCG00000006729	FAM46C	family with sequence similarity 46 member C [Source:HGNC Symbol;Acc:HGNC:24712]	113099056	113117657	-	2211	downstream
chr10	ALDBSSCT0000001491	ALDBSSCG0000000905	--	Annotated_lncRNA	36252990	36270869	-	ENSSSCT00000012004	ENSSSCG00000010967	CCL27	C-C motif chemokine ligand 27 [Source:HGNC Symbol;Acc:HGNC:10626]	36278074	36278822	+	7204	upstream
chr10	ALDBSSCT0000001491	ALDBSSCG0000000905	--	Annotated_lncRNA	36252990	36270869	-	ENSSSCT00000012005	ENSSSCG00000010968	IL11RA	interleukin 11 receptor subunit alpha [Source:HGNC Symbol;Acc:HGNC:5967]	36278905	36289115	-	8035	downstream
chr10	ALDBSSCT0000001491	ALDBSSCG0000000905	--	Annotated_lncRNA	36252990	36270869	-	ENSSSCT00000012003	ENSSSCG00000010966	CCL19	chemokine (C-C motif) ligand 19 [Source:HGNC Symbol;Acc:HGNC:10617]	36249787	36252381	+	608	downstream
chr10	ALDBSSCT0000001492	ALDBSSCG0000000905	--	Annotated_lncRNA	36252990	36274729	-	ENSSSCT00000012004	ENSSSCG00000010967	CCL27	C-C motif chemokine ligand 27 [Source:HGNC Symbol;Acc:HGNC:10626]	36278074	36278822	+	3344	upstream
chr10	ALDBSSCT0000001492	ALDBSSCG0000000905	--	Annotated_lncRNA	36252990	36274729	-	ENSSSCT00000012005	ENSSSCG00000010968	IL11RA	interleukin 11 receptor subunit alpha [Source:HGNC Symbol;Acc:HGNC:5967]	36278905	36289115	-	4175	downstream
chr10	ALDBSSCT0000001492	ALDBSSCG0000000905	--	Annotated_lncRNA	36252990	36274729	-	ENSSSCT00000012003	ENSSSCG00000010966	CCL19	chemokine (C-C motif) ligand 19 [Source:HGNC Symbol;Acc:HGNC:10617]	36249787	36252381	+	608	downstream
chr10	ALDBSSCT0000001492	ALDBSSCG0000000905	--	Annotated_lncRNA	36252990	36274729	-	ENSSSCT00000036576	ENSSSCG00000010968	IL11RA	interleukin 11 receptor subunit alpha [Source:HGNC Symbol;Acc:HGNC:5967]	36283919	36287846	-	9189	downstream
chr10	ALDBSSCT0000001492	ALDBSSCG0000000905	--	Annotated_lncRNA	36252990	36274729	-	ENSSSCT00000033528	ENSSSCG00000010968	IL11RA	interleukin 11 receptor subunit alpha [Source:HGNC Symbol;Acc:HGNC:5967]	36283102	36285987	-	8372	downstream
chr10	ALDBSSCT0000001492	ALDBSSCG0000000905	--	Annotated_lncRNA	36252990	36274729	-	ENSSSCT00000036246	ENSSSCG00000010968	IL11RA	interleukin 11 receptor subunit alpha [Source:HGNC Symbol;Acc:HGNC:5967]	36284037	36289170	-	9307	downstream
chr3	LNC_001367	XLOC_081171	--	Novel_lncRNA	108147841	108161007	-	ENSSSCT00000009289	ENSSSCG00000008487	ATL2	atlastin GTPase 2 [Source:HGNC Symbol;Acc:HGNC:24047]	108108201	108147738	+	102	downstream
chr14	ENSSSCT00000020430	ENSSSCG00000018835	7SK	Annotated_lncRNA	138442959	138443263	-	ENSSSCT00000011666	ENSSSCG00000010665	--	--	138373869	138474890	-	-305	sense_overlapping
chr3	LNC_001339	XLOC_079669	--	Novel_lncRNA	43699628	43705034	-	ENSSSCT00000023261	ENSSSCG00000027166	--	--	43705200	43898052	+	165	upstream
chr15	ALDBSSCT0000004504	ALDBSSCG0000002741	--	Annotated_lncRNA	75538410	75586248	-	ENSSSCT00000035160	ENSSSCG00000015889	TANK	TRAF family member associated NFKB activator [Source:HGNC Symbol;Acc:HGNC:11562]	75475654	75529763	+	8646	downstream
chr15	ALDBSSCT0000004504	ALDBSSCG0000002741	--	Annotated_lncRNA	75538410	75586248	-	ENSSSCT00000017301	ENSSSCG00000015889	TANK	TRAF family member associated NFKB activator [Source:HGNC Symbol;Acc:HGNC:11562]	75451998	75529953	+	8456	downstream
chr6	ALDBSSCT0000009328	ALDBSSCG0000005688	--	Annotated_lncRNA	47019232	47023895	-	ENSSSCT00000033534	ENSSSCG00000003079	PVR	poliovirus receptor [Source:HGNC Symbol;Acc:HGNC:9705]	47026980	47036912	-	3084	downstream
chr6	ALDBSSCT0000009328	ALDBSSCG0000005688	--	Annotated_lncRNA	47019232	47023895	-	ENSSSCT00000003415	ENSSSCG00000003078	CEACAM19	carcinoembryonic antigen related cell adhesion molecule 19 [Source:HGNC Symbol;Acc:HGNC:31951]	46996172	47016744	-	2487	upstream
chr6	ALDBSSCT0000009328	ALDBSSCG0000005688	--	Annotated_lncRNA	47019232	47023895	-	ENSSSCT00000003416	ENSSSCG00000003079	PVR	poliovirus receptor [Source:HGNC Symbol;Acc:HGNC:9705]	47025630	47036662	-	1734	downstream
chr14	ALDBSSCT0000004044	ALDBSSCG0000002442	--	Annotated_lncRNA	125215109	125220107	-	ENSSSCT00000011609	ENSSSCG00000010613	ITPRIP	inositol 1,4,5-trisphosphate receptor interacting protein [Source:HGNC Symbol;Acc:HGNC:29370]	125224090	125225745	-	3982	downstream
chr14	ALDBSSCT0000004044	ALDBSSCG0000002442	--	Annotated_lncRNA	125215109	125220107	-	ENSSSCT00000011608	ENSSSCG00000030271	--	--	125187426	125209743	+	5365	downstream
chr1	ALDBSSCT0000000561	ALDBSSCG0000000332	--	Annotated_lncRNA	306016624	306017621	+	ENSSSCT00000006291	ENSSSCG00000005721	--	--	306021149	306021451	+	3527	upstream
chr9	ALDBSSCT0000011289	ALDBSSCG0000006855	--	Annotated_lncRNA	105305540	105371873	+	ENSSSCT00000025180	ENSSSCG00000027856	--	--	105378496	105407313	-	6622	downstream
chr3	LNC_001333	XLOC_079669	--	Novel_lncRNA	43686292	43704980	-	ENSSSCT00000023261	ENSSSCG00000027166	--	--	43705200	43898052	+	219	upstream
chr3	LNC_001332	XLOC_079669	--	Novel_lncRNA	43686292	43704962	-	ENSSSCT00000023261	ENSSSCG00000027166	--	--	43705200	43898052	+	237	upstream
chr3	LNC_001331	XLOC_079669	--	Novel_lncRNA	43686292	43704947	-	ENSSSCT00000023261	ENSSSCG00000027166	--	--	43705200	43898052	+	252	upstream
chr1	ALDBSSCT0000000966	ALDBSSCG0000000593	--	Annotated_lncRNA	243274322	243293444	-	ENSSSCT00000005755	ENSSSCG00000005222	SLC1A1	excitatory amino acid transporter 3 [Source:RefSeq peptide;Acc:NP_001158121]	243229381	243270334	-	3987	upstream
chr7	ALDBSSCT0000010155	ALDBSSCG0000006182	--	Annotated_lncRNA	43839124	43855137	-	ENSSSCT00000001865	ENSSSCG00000001672	CRIP3	cysteine rich protein 3 [Source:HGNC Symbol;Acc:HGNC:17751]	43834679	43838041	-	1082	upstream
chr7	ALDBSSCT0000010155	ALDBSSCG0000006182	--	Annotated_lncRNA	43839124	43855137	-	ENSSSCT00000025126	ENSSSCG00000027796	SLC22A7	Solute carrier family 22 member 7 [Source:UniProtKB/Swiss-Prot;Acc:Q1RPP5]	43828818	43835223	+	3900	downstream
chr7	ALDBSSCT0000010155	ALDBSSCG0000006182	--	Annotated_lncRNA	43839124	43855137	-	ENSSSCT00000001859	ENSSSCG00000001667	ZNF318	zinc finger protein 318 [Source:HGNC Symbol;Acc:HGNC:13578]	43857573	43889096	-	2435	downstream
GL894004.1	LNC_000091	XLOC_005611	--	Novel_lncRNA	53364	62651	-	ENSSSCT00000024563	ENSSSCG00000022593	TSHR	thyrotropin receptor precursor [Source:RefSeq peptide;Acc:NP_999462]	32743	104314	+	-9288	antisense
GL894004.1	LNC_000091	XLOC_005611	--	Novel_lncRNA	53364	62651	-	ENSSSCT00000031113	ENSSSCG00000022593	TSHR	thyrotropin receptor precursor [Source:RefSeq peptide;Acc:NP_999462]	32743	104314	+	-9288	antisense
GL894147.1	LNC_000094	XLOC_006148	--	Novel_lncRNA	3666	6186	-	ENSSSCT00000029869	ENSSSCG00000025835	--	--	753	11814	+	-2521	antisense
GL894147.1	LNC_000094	XLOC_006148	--	Novel_lncRNA	3666	6186	-	ENSSSCT00000030675	ENSSSCG00000025835	--	--	762	11814	+	-2521	antisense
GL894237.1	LNC_000097	XLOC_006404	--	Novel_lncRNA	44819	51498	+	ENSSSCT00000022856	ENSSSCG00000020752	SMCR8	Smith-Magenis syndrome chromosome region, candidate 8 [Source:HGNC Symbol;Acc:HGNC:17921]	38761	43841	-	977	upstream
chr15	ALDBSSCT0000004305	ALDBSSCG0000002605	--	Annotated_lncRNA	121111586	121117156	+	ENSSSCT00000017563	ENSSSCG00000016130	ZDBF2	zinc finger DBF-type containing 2 [Source:HGNC Symbol;Acc:HGNC:29313]	121121008	121137870	+	3851	upstream
chrX	LNC_002034	XLOC_122794	--	Novel_lncRNA	98281318	98308501	-	ENSSSCT00000035058	ENSSSCG00000012532	TCEAL1	transcription elongation factor A like 1 [Source:HGNC Symbol;Acc:HGNC:11616]	98307840	98309824	+	-662	antisense
chrX	LNC_002034	XLOC_122794	--	Novel_lncRNA	98281318	98308501	-	ENSSSCT00000033893	ENSSSCG00000012531	CH242-51F15.2	-	98276834	98278747	+	2570	downstream
chrX	LNC_002034	XLOC_122794	--	Novel_lncRNA	98281318	98308501	-	ENSSSCT00000013700	ENSSSCG00000012531	CH242-51F15.2	-	98277951	98278553	+	2764	downstream
chrX	LNC_002034	XLOC_122794	--	Novel_lncRNA	98281318	98308501	-	ENSSSCT00000013701	ENSSSCG00000012532	TCEAL1	transcription elongation factor A like 1 [Source:HGNC Symbol;Acc:HGNC:11616]	98308798	98309277	+	296	upstream
chrX	LNC_002034	XLOC_122794	--	Novel_lncRNA	98281318	98308501	-	ENSSSCT00000036371	ENSSSCG00000012532	TCEAL1	transcription elongation factor A like 1 [Source:HGNC Symbol;Acc:HGNC:11616]	98307974	98309137	+	-528	antisense
chrX	LNC_002034	XLOC_122794	--	Novel_lncRNA	98281318	98308501	-	ENSSSCT00000035753	ENSSSCG00000012532	TCEAL1	transcription elongation factor A like 1 [Source:HGNC Symbol;Acc:HGNC:11616]	98307824	98309488	+	-678	antisense
chrX	LNC_002037	XLOC_123252	--	Novel_lncRNA	126245776	126249374	-	ENSSSCT00000035183	ENSSSCG00000031011	CCDC160	coiled-coil domain containing 160 [Source:HGNC Symbol;Acc:HGNC:37286]	126245626	126256149	+	-3599	antisense
chr9	ALDBSSCT0000011287	ALDBSSCG0000006854	--	Annotated_lncRNA	102529749	102535957	+	ENSSSCT00000016765	ENSSSCG00000015390	ABCB1	ATP-binding cassette, sub-family B (MDR/TAP), member 1 [Source:RefSeq peptide;Acc:NP_001295175]	102544383	102626450	+	8425	upstream
chr7	ALDBSSCT0000009854	ALDBSSCG0000005995	--	Annotated_lncRNA	83582130	83585916	+	ENSSSCT00000002397	ENSSSCG00000002143	PARP2	poly(ADP-ribose) polymerase 2 [Source:HGNC Symbol;Acc:HGNC:272]	83563415	83579726	-	2403	upstream
chrX	LNC_002038	XLOC_123252	--	Novel_lncRNA	126245776	126252881	-	ENSSSCT00000035183	ENSSSCG00000031011	CCDC160	coiled-coil domain containing 160 [Source:HGNC Symbol;Acc:HGNC:37286]	126245626	126256149	+	-7106	antisense
chr7	ALDBSSCT0000009851	ALDBSSCG0000005995	--	Annotated_lncRNA	83582110	83590777	+	ENSSSCT00000002398	ENSSSCG00000002144	CCNB1IP1	cyclin B1 interacting protein 1 [Source:HGNC Symbol;Acc:HGNC:19437]	83598033	83602985	+	7255	upstream
chr7	ALDBSSCT0000009851	ALDBSSCG0000005995	--	Annotated_lncRNA	83582110	83590777	+	ENSSSCT00000002397	ENSSSCG00000002143	PARP2	poly(ADP-ribose) polymerase 2 [Source:HGNC Symbol;Acc:HGNC:272]	83563415	83579726	-	2383	upstream
chr8	ALDBSSCT0000010735	ALDBSSCG0000006495	--	Annotated_lncRNA	2040589	2047799	-	ENSSSCT00000009522	ENSSSCG00000008703	ADRA2C	adrenoceptor alpha 2C [Source:HGNC Symbol;Acc:HGNC:283]	2048702	2050084	+	902	upstream
chr15	ALDBSSCT0000004160	ALDBSSCG0000002511	--	Annotated_lncRNA	34935634	34937734	+	ENSSSCT00000024092	ENSSSCG00000027791	--	--	34740914	34928241	+	7392	downstream
chr15	ALDBSSCT0000004160	ALDBSSCG0000002511	--	Annotated_lncRNA	34935634	34937734	+	ENSSSCT00000017131	ENSSSCG00000015731	--	--	34947026	34976543	+	9291	upstream
chr8	ALDBSSCT0000010731	ALDBSSCG0000006492	--	Annotated_lncRNA	1457474	1458292	-	ENSSSCT00000009515	ENSSSCG00000008697	HTT	huntingtin [Source:HGNC Symbol;Acc:HGNC:4851]	1461830	1586205	+	3537	upstream
chr13	ALDBSSCT0000002609	ALDBSSCG0000001587	--	Annotated_lncRNA	33878497	33888233	+	ENSSSCT00000012419	ENSSSCG00000011342	DHX30	DEAH-box helicase 30 [Source:HGNC Symbol;Acc:HGNC:16716]	33893740	33908861	+	5506	upstream
chr2	LNC_001235	XLOC_073990	--	Novel_lncRNA	93432831	93435655	-	ENSSSCT00000025963	ENSSSCG00000029173	TMEM167A	transmembrane protein 167A [Source:HGNC Symbol;Acc:HGNC:28330]	93411267	93426964	-	5866	upstream
chr2	LNC_001235	XLOC_073990	--	Novel_lncRNA	93432831	93435655	-	ENSSSCT00000015439	ENSSSCG00000014135	XRCC4	X-ray repair cross complementing 4 [Source:HGNC Symbol;Acc:HGNC:12831]	93441364	93638350	+	5708	upstream
chr14	LNC_000893	XLOC_052664	--	Novel_lncRNA	133618210	133628181	-	ENSSSCT00000011628	ENSSSCG00000010632	TECTB	tectorin beta [Source:HGNC Symbol;Acc:HGNC:11721]	133604759	133622389	+	-4180	antisense
chr14	LNC_000896	XLOC_052952	--	Novel_lncRNA	153213754	153214370	-	ENSSSCT00000011788	ENSSSCG00000010774	--	--	153216311	153221497	+	1940	upstream
chr14	LNC_000896	XLOC_052952	--	Novel_lncRNA	153213754	153214370	-	ENSSSCT00000011787	ENSSSCG00000010773	TUBGCP2	tubulin gamma complex associated protein 2 [Source:HGNC Symbol;Acc:HGNC:18599]	153196047	153212153	-	1600	upstream
chr14	LNC_000899	XLOC_052969	--	Novel_lncRNA	153806099	153807511	-	ENSSSCT00000011808	ENSSSCG00000010792	PRAP1	proline rich acidic protein 1 [Source:HGNC Symbol;Acc:HGNC:23304]	153794853	153798758	-	7340	upstream
chr14	LNC_000898	XLOC_052969	--	Novel_lncRNA	153804719	153808458	-	ENSSSCT00000011808	ENSSSCG00000010792	PRAP1	proline rich acidic protein 1 [Source:HGNC Symbol;Acc:HGNC:23304]	153794853	153798758	-	5960	upstream
chr4	ALDBSSCT0000007403	ALDBSSCG0000004487	--	Annotated_lncRNA	187015	193797	+	ENSSSCT00000033747	ENSSSCG00000029830	RPL8	ribosomal protein L8 [Source:HGNC Symbol;Acc:HGNC:10368]	200005	207408	+	6207	upstream
chr4	ALDBSSCT0000007403	ALDBSSCG0000004487	--	Annotated_lncRNA	187015	193797	+	ENSSSCT00000006469	ENSSSCG00000005890	ZNF7	zinc finger protein 7 [Source:HGNC Symbol;Acc:HGNC:13139]	176559	184751	-	2263	upstream
chr5	ALDBSSCT0000008287	ALDBSSCG0000005032	--	Annotated_lncRNA	22948750	22950461	+	ENSSSCT00000000402	ENSSSCG00000000376	--	--	22937054	22941076	-	7673	upstream
chr5	ALDBSSCT0000008287	ALDBSSCG0000005032	--	Annotated_lncRNA	22948750	22950461	+	ENSSSCT00000000398	ENSSSCG00000000373	CDK2	cyclin dependent kinase 2 [Source:HGNC Symbol;Acc:HGNC:1771]	22941174	22946754	+	1995	downstream
chr6	LNC_001691	XLOC_100200	--	Novel_lncRNA	147308275	147311491	-	ENSSSCT00000029203	ENSSSCG00000003859	ZCCHC11	zinc finger CCHC-type containing 11 [Source:HGNC Symbol;Acc:HGNC:28981]	147320008	147467617	-	8516	downstream
chr6	LNC_001691	XLOC_100200	--	Novel_lncRNA	147308275	147311491	-	ENSSSCT00000004270	ENSSSCG00000003858	--	--	147310082	147313173	+	-1410	antisense
chr6	LNC_001691	XLOC_100200	--	Novel_lncRNA	147308275	147311491	-	ENSSSCT00000004271	ENSSSCG00000003859	ZCCHC11	zinc finger CCHC-type containing 11 [Source:HGNC Symbol;Acc:HGNC:28981]	147320008	147467566	-	8516	downstream
chr15	ALDBSSCT0000004271	ALDBSSCG0000002586	--	Annotated_lncRNA	107672650	107714888	+	ENSSSCT00000017487	ENSSSCG00000016062	NABP1	nucleic acid binding protein 1 [Source:HGNC Symbol;Acc:HGNC:26232]	107658457	107666685	+	5964	downstream
chr7	LNC_001694	XLOC_100582	--	Novel_lncRNA	5810361	5814450	+	ENSSSCT00000001126	ENSSSCG00000001033	SLC35B3	solute carrier family 35 member B3 [Source:HGNC Symbol;Acc:HGNC:21601]	5785075	5810301	-	59	upstream
chr7	LNC_001696	XLOC_100761	--	Novel_lncRNA	14867461	14896290	+	ENSSSCT00000001171	ENSSSCG00000001076	RNF144B	ring finger protein 144B [Source:HGNC Symbol;Acc:HGNC:21578]	14781095	14860574	+	6886	downstream
chr3	ALDBSSCT0000006684	ALDBSSCG0000004083	--	Annotated_lncRNA	42723326	42735638	+	ENSSSCT00000008829	ENSSSCG00000008057	AMDHD2	amidohydrolase domain containing 2 [Source:HGNC Symbol;Acc:HGNC:24262]	42707012	42716475	+	6850	downstream
chr3	ALDBSSCT0000006686	ALDBSSCG0000004084	--	Annotated_lncRNA	44171600	44175089	+	ENSSSCT00000027344	ENSSSCG00000025899	--	--	44183278	44184962	+	8188	upstream
chr3	ALDBSSCT0000006681	ALDBSSCG0000004081	--	Annotated_lncRNA	42579658	42588182	+	ENSSSCT00000030051	ENSSSCG00000027813	--	--	42590747	42609843	+	2564	upstream
chr4	LNC_001452	XLOC_084859	--	Novel_lncRNA	2427645	2434886	-	ENSSSCT00000006513	ENSSSCG00000005933	CHRAC1	chromatin accessibility complex 1 [Source:HGNC Symbol;Acc:HGNC:13544]	2425325	2427426	+	218	downstream
chr4	LNC_001453	XLOC_084859	--	Novel_lncRNA	2427645	2452328	-	ENSSSCT00000006513	ENSSSCG00000005933	CHRAC1	chromatin accessibility complex 1 [Source:HGNC Symbol;Acc:HGNC:13544]	2425325	2427426	+	218	downstream
chr4	LNC_001451	XLOC_084707	--	Novel_lncRNA	142206554	142209376	+	ENSSSCT00000007598	ENSSSCG00000006935	CLCA2	chloride channel accessory 2 [Source:HGNC Symbol;Acc:HGNC:2016]	142188696	142223109	-	-2823	antisense
chr4	LNC_001451	XLOC_084707	--	Novel_lncRNA	142206554	142209376	+	ENSSSCT00000029350	ENSSSCG00000006935	CLCA2	chloride channel accessory 2 [Source:HGNC Symbol;Acc:HGNC:2016]	142188696	142223109	-	-2823	antisense
chr4	LNC_001454	XLOC_084859	--	Novel_lncRNA	2427645	2452328	-	ENSSSCT00000006513	ENSSSCG00000005933	CHRAC1	chromatin accessibility complex 1 [Source:HGNC Symbol;Acc:HGNC:13544]	2425325	2427426	+	218	downstream
chr4	LNC_001455	XLOC_084859	--	Novel_lncRNA	2427645	2468545	-	ENSSSCT00000006513	ENSSSCG00000005933	CHRAC1	chromatin accessibility complex 1 [Source:HGNC Symbol;Acc:HGNC:13544]	2425325	2427426	+	218	downstream
chr9	ALDBSSCT0000011047	ALDBSSCG0000006705	--	Annotated_lncRNA	3407678	3416160	+	ENSSSCT00000028317	ENSSSCG00000026560	--	--	3423796	3424740	+	7635	upstream
chr5	ALDBSSCT0000008289	ALDBSSCG0000005033	--	Annotated_lncRNA	23093801	23095966	+	ENSSSCT00000027288	ENSSSCG00000020725	--	--	22968087	23092644	+	1156	downstream
chr5	ALDBSSCT0000008289	ALDBSSCG0000005033	--	Annotated_lncRNA	23093801	23095966	+	ENSSSCT00000000403	ENSSSCG00000000377	--	--	23103687	23107038	-	7720	downstream
chr5	ALDBSSCT0000008289	ALDBSSCG0000005033	--	Annotated_lncRNA	23093801	23095966	+	ENSSSCT00000031652	ENSSSCG00000021091	--	--	23083204	23085626	-	8174	upstream
chr9	ALDBSSCT0000011514	ALDBSSCG0000007001	--	Annotated_lncRNA	46445912	46454335	-	ENSSSCT00000031984	ENSSSCG00000030095	ZBTB16	zinc finger and BTB domain containing 16 [Source:HGNC Symbol;Acc:HGNC:12930]	46458177	46459448	+	3841	upstream
chr6	ALDBSSCT0000009037	ALDBSSCG0000005517	--	Annotated_lncRNA	105519721	105541134	+	ENSSSCT00000036486	ENSSSCG00000003722	CDH2	cadherin 2 [Source:HGNC Symbol;Acc:HGNC:1759]	105486591	105518711	-	1009	upstream
chr9	ALDBSSCT0000011048	ALDBSSCG0000006705	--	Annotated_lncRNA	3407687	3416160	+	ENSSSCT00000028317	ENSSSCG00000026560	--	--	3423796	3424740	+	7635	upstream
chr9	ALDBSSCT0000011049	ALDBSSCG0000006706	--	Annotated_lncRNA	3756820	3763838	+	ENSSSCT00000025039	ENSSSCG00000029189	DCHS1	dachsous cadherin-related 1 [Source:HGNC Symbol;Acc:HGNC:13681]	3770126	3791588	+	6287	upstream
chr5	ALDBSSCT0000008532	ALDBSSCG0000005192	--	Annotated_lncRNA	23652207	23657322	-	ENSSSCT00000033906	ENSSSCG00000000405	ATP5B	ATP synthase, H+ transporting, mitochondrial F1 complex, beta polypeptide [Source:HGNC Symbol;Acc:HGNC:830]	23659084	23666689	-	1761	downstream
chr5	ALDBSSCT0000008532	ALDBSSCG0000005192	--	Annotated_lncRNA	23652207	23657322	-	ENSSSCT00000000438	ENSSSCG00000000405	ATP5B	ATP synthase, H+ transporting, mitochondrial F1 complex, beta polypeptide [Source:HGNC Symbol;Acc:HGNC:830]	23659084	23666696	-	1761	downstream
chr13	LNC_000679	XLOC_040561	--	Novel_lncRNA	108913758	108935248	+	ENSSSCT00000024938	ENSSSCG00000023434	--	--	108941014	109147849	+	5765	upstream
chr13	ALDBSSCT0000003098	ALDBSSCG0000001859	--	Annotated_lncRNA	31043268	31047279	-	ENSSSCT00000035976	ENSSSCG00000011300	EXOSC7	exosome component 7 [Source:HGNC Symbol;Acc:HGNC:28112]	31054738	31086642	+	7458	upstream
chr13	ALDBSSCT0000003098	ALDBSSCG0000001859	--	Annotated_lncRNA	31043268	31047279	-	ENSSSCT00000012371	ENSSSCG00000011300	EXOSC7	exosome component 7 [Source:HGNC Symbol;Acc:HGNC:28112]	31054816	31084064	+	7536	upstream
chr13	ALDBSSCT0000003099	ALDBSSCG0000001860	--	Annotated_lncRNA	31135058	31135601	-	ENSSSCT00000012368	ENSSSCG00000011298	CDCP1	CUB domain containing protein 1 [Source:HGNC Symbol;Acc:HGNC:24357]	31136842	31197290	-	1240	downstream
chr13	LNC_000677	XLOC_040234	--	Novel_lncRNA	90037117	90043398	+	ENSSSCT00000025924	ENSSSCG00000022073	--	--	90030554	90034138	+	2978	downstream
chr13	LNC_000676	XLOC_040234	--	Novel_lncRNA	90037117	90041356	+	ENSSSCT00000025924	ENSSSCG00000022073	--	--	90030554	90034138	+	2978	downstream
chr6	ALDBSSCT0000008947	ALDBSSCG0000005476	--	Annotated_lncRNA	77752987	77754366	+	ENSSSCT00000003955	ENSSSCG00000003561	ZDHHC18	zinc finger DHHC-type containing 18 [Source:HGNC Symbol;Acc:HGNC:20712]	77724043	77750762	+	2224	downstream
chr6	ALDBSSCT0000008947	ALDBSSCG0000005476	--	Annotated_lncRNA	77752987	77754366	+	ENSSSCT00000003956	ENSSSCG00000003562	SFN	stratifin [Source:HGNC Symbol;Acc:HGNC:10773]	77758724	77760027	+	4357	upstream
chr7	LNC_001716	XLOC_101902	--	Novel_lncRNA	52559110	52573112	+	ENSSSCT00000031013	ENSSSCG00000025488	MCM3	minichromosome maintenance complex component 3 [Source:HGNC Symbol;Acc:HGNC:6945]	52534784	52554592	-	4517	upstream
JH118620.1	ENSSSCT00000029022	ENSSSCG00000027271	Metazoa_SRP	Annotated_lncRNA	62821	63121	+	ENSSSCT00000030186	ENSSSCG00000027119	COA7	cytochrome c oxidase assembly factor 7 (putative) [Source:HGNC Symbol;Acc:HGNC:25716]	65574	77254	+	2452	upstream
chr6	LNC_001659	XLOC_097765	--	Novel_lncRNA	41023185	41025203	-	ENSSSCT00000024653	ENSSSCG00000025355	ZNF146	zinc finger protein 146 [Source:HGNC Symbol;Acc:HGNC:12931]	41000464	41022685	-	499	upstream
chr13	ALDBSSCT0000003143	ALDBSSCG0000001889	--	Annotated_lncRNA	55516510	55518168	-	ENSSSCT00000012589	ENSSSCG00000011504	EOGT	EGF domain specific O-linked N-acetylglucosamine transferase [Source:HGNC Symbol;Acc:HGNC:28526]	55478569	55514534	-	1975	upstream
chr13	ALDBSSCT0000003143	ALDBSSCG0000001889	--	Annotated_lncRNA	55516510	55518168	-	ENSSSCT00000012597	ENSSSCG00000011510	TMF1	TATA element modulatory factor 1 [Source:HGNC Symbol;Acc:HGNC:11870]	55528070	55557900	-	9901	downstream
chr13	ALDBSSCT0000003144	ALDBSSCG0000001890	--	Annotated_lncRNA	55687084	55722822	-	ENSSSCT00000012594	ENSSSCG00000011508	LMOD3	leiomodin 3 [Source:HGNC Symbol;Acc:HGNC:6649]	55680244	55684873	-	2210	upstream
chr2	ALDBSSCT0000006302	ALDBSSCG0000003854	--	Annotated_lncRNA	65164411	65165900	-	ENSSSCT00000015049	ENSSSCG00000013774	--	--	65158623	65161352	-	3058	upstream
chr2	ALDBSSCT0000006302	ALDBSSCG0000003854	--	Annotated_lncRNA	65164411	65165900	-	ENSSSCT00000015059	ENSSSCG00000013782	--	--	65155215	65156396	-	8014	upstream
chr2	ALDBSSCT0000006302	ALDBSSCG0000003854	--	Annotated_lncRNA	65164411	65165900	-	ENSSSCT00000015060	ENSSSCG00000013783	--	--	65150334	65154629	+	9781	downstream
chr3	ALDBSSCT0000006753	ALDBSSCG0000004124	--	Annotated_lncRNA	75768589	75800312	+	ENSSSCT00000009124	ENSSSCG00000008332	C2orf42	chromosome 2 open reading frame 42 [Source:HGNC Symbol;Acc:HGNC:26056]	75738677	75763171	+	5417	downstream
chr3	ALDBSSCT0000006754	ALDBSSCG0000004125	--	Annotated_lncRNA	75816622	75883119	+	ENSSSCT00000028976	ENSSSCG00000027224	PCBP1	poly(rC) binding protein 1 [Source:HGNC Symbol;Acc:HGNC:8647]	75814285	75815355	-	1266	upstream
chrX	LNC_002035	XLOC_122951	--	Novel_lncRNA	112614443	112640397	-	ENSSSCT00000013781	ENSSSCG00000012602	C1GALT1C1	C1GALT1 specific chaperone 1 [Source:HGNC Symbol;Acc:HGNC:24338]	112640598	112644344	+	200	upstream
JH118414.1	ALDBSSCT0000011860	ALDBSSCG0000007207	--	Annotated_lncRNA	96438	99193	-	ENSSSCT00000018781	ENSSSCG00000017252	KCNJ2	inward rectifier potassium channel 2 [Source:RefSeq peptide;Acc:NP_999316]	92222	93638	-	2799	upstream
JH118582.1	ALDBSSCT0000011863	ALDBSSCG0000007210	--	Annotated_lncRNA	124464	132515	-	ENSSSCT00000030314	ENSSSCG00000021165	ADRB2	adrenoceptor beta 2 [Source:HGNC Symbol;Acc:HGNC:286]	134596	135994	-	2080	downstream
chr2	ALDBSSCT0000006439	ALDBSSCG0000003931	--	Annotated_lncRNA	137452036	137454628	-	ENSSSCT00000015580	ENSSSCG00000014259	--	--	137455203	137519461	+	574	upstream
chr6	ENSSSCT00000004012	ENSSSCG00000003617	TXLNA	Annotated_lncRNA	82743348	82758576	+	ENSSSCT00000028956	ENSSSCG00000024845	--	--	82766571	82768678	-	7994	downstream
chr6	ENSSSCT00000004012	ENSSSCG00000003617	TXLNA	Annotated_lncRNA	82743348	82758576	+	ENSSSCT00000004007	ENSSSCG00000003612	EIF3I	eukaryotic translation initiation factor 3 subunit I [Source:HGNC Symbol;Acc:HGNC:3272]	82728285	82737483	+	5864	downstream
chr12	ALDBSSCT0000002238	ALDBSSCG0000001345	--	Annotated_lncRNA	37345715	37350558	+	ENSSSCT00000019232	ENSSSCG00000017668	VMP1	vacuole membrane protein 1 [Source:HGNC Symbol;Acc:HGNC:29559]	37208395	37342001	+	3713	downstream
chr12	ALDBSSCT0000002238	ALDBSSCG0000001345	--	Annotated_lncRNA	37345715	37350558	+	ENSSSCT00000019233	ENSSSCG00000017669	TUBD1	tubulin delta 1 [Source:HGNC Symbol;Acc:HGNC:16811]	37355465	37386517	-	4906	downstream
chr6	ALDBSSCT0000008815	ALDBSSCG0000005384	--	Annotated_lncRNA	41234670	41253287	+	ENSSSCT00000003246	ENSSSCG00000002933	ZNF382	zinc finger protein 382 [Source:HGNC Symbol;Acc:HGNC:17409]	41220865	41232735	-	1934	upstream
chr6	ALDBSSCT0000008810	ALDBSSCG0000005381	--	Annotated_lncRNA	40640494	40642074	+	ENSSSCT00000003202	ENSSSCG00000002898	--	--	40630738	40638650	+	1843	downstream
chr6	ALDBSSCT0000008810	ALDBSSCG0000005381	--	Annotated_lncRNA	40640494	40642074	+	ENSSSCT00000025250	ENSSSCG00000023498	--	--	40634195	40639501	-	992	upstream
chr17	LNC_001070	XLOC_064562	--	Novel_lncRNA	35127228	35137266	-	ENSSSCT00000025915	ENSSSCG00000022124	NANP	N-acetylneuraminic acid phosphatase [Source:HGNC Symbol;Acc:HGNC:16140]	35137342	35149722	+	75	upstream
chr17	LNC_001071	XLOC_064568	--	Novel_lncRNA	35723480	35851288	-	ENSSSCT00000007811	ENSSSCG00000007139	ADRA1D	adrenoceptor alpha 1D [Source:HGNC Symbol;Acc:HGNC:280]	35851523	35872814	+	234	upstream
chr12	ALDBSSCT0000002233	ALDBSSCG0000001341	--	Annotated_lncRNA	35290308	35295411	+	ENSSSCT00000019188	ENSSSCG00000017626	SRSF1	serine and arginine rich splicing factor 1 [Source:HGNC Symbol;Acc:HGNC:10780]	35280155	35283908	+	6399	downstream
chr12	ALDBSSCT0000002233	ALDBSSCG0000001341	--	Annotated_lncRNA	35290308	35295411	+	ENSSSCT00000026795	ENSSSCG00000025930	--	--	35303883	35316440	+	8471	upstream
chr12	ALDBSSCT0000002233	ALDBSSCG0000001341	--	Annotated_lncRNA	35290308	35295411	+	ENSSSCT00000024902	ENSSSCG00000025930	--	--	35302088	35316440	+	6676	upstream
chr17	LNC_001073	XLOC_064770	--	Novel_lncRNA	42071815	42093615	-	ENSSSCT00000030451	ENSSSCG00000027410	CBFA2T2	CBFA2/RUNX1 translocation partner 2 [Source:HGNC Symbol;Acc:HGNC:1536]	41984968	42071429	-	385	upstream
chr17	LNC_001073	XLOC_064770	--	Novel_lncRNA	42071815	42093615	-	ENSSSCT00000027481	ENSSSCG00000029626	NECAB3	N-terminal EF-hand calcium binding protein 3 [Source:HGNC Symbol;Acc:HGNC:15851]	42101648	42116081	-	8032	downstream
chr17	LNC_001074	XLOC_064799	--	Novel_lncRNA	43714834	43723600	-	ENSSSCT00000026905	ENSSSCG00000026585	PROCR	protein C receptor [Source:HGNC Symbol;Acc:HGNC:9452]	43729704	43734474	+	6103	upstream
chr17	LNC_001074	XLOC_064799	--	Novel_lncRNA	43714834	43723600	-	ENSSSCT00000007977	ENSSSCG00000007291	EDEM2	ER degradation enhancing alpha-mannosidase like protein 2 [Source:HGNC Symbol;Acc:HGNC:15877]	43680436	43712438	-	2395	upstream
chr17	LNC_001075	XLOC_064853	--	Novel_lncRNA	45169530	45175163	-	ENSSSCT00000008006	ENSSSCG00000026071	--	--	45160728	45165060	-	4469	upstream
chr17	LNC_001077	XLOC_064992	--	Novel_lncRNA	51435351	51512629	-	ENSSSCT00000008057	ENSSSCG00000007362	SRSF6	serine/arginine-rich splicing factor 6 [Source:HGNC Symbol;Acc:HGNC:10788]	51512995	51516682	+	365	upstream
chr12	ALDBSSCT0000002305	ALDBSSCG0000001389	--	Annotated_lncRNA	61909356	61910228	+	ENSSSCT00000019622	ENSSSCG00000018027	--	--	61898102	61907741	+	1614	downstream
chr6	ALDBSSCT0000008921	ALDBSSCG0000005453	--	Annotated_lncRNA	64595123	64595908	+	ENSSSCT00000003773	ENSSSCG00000003401	KIF1B	kinesin family member 1B [Source:HGNC Symbol;Acc:HGNC:16636]	64444216	64593489	+	1633	downstream
chr6	ALDBSSCT0000008927	ALDBSSCG0000005458	--	Annotated_lncRNA	70557427	70558813	+	ENSSSCT00000031460	ENSSSCG00000022946	--	--	70568784	70578438	+	9970	upstream
chr12	ALDBSSCT0000002309	ALDBSSCG0000001393	--	Annotated_lncRNA	62300759	62307945	+	ENSSSCT00000019628	ENSSSCG00000018033	UBB	ubiquitin B [Source:HGNC Symbol;Acc:HGNC:12463]	62297983	62299883	-	875	upstream
chr2	ALDBSSCT0000006328	ALDBSSCG0000003870	--	Annotated_lncRNA	74635388	74641394	-	ENSSSCT00000025153	ENSSSCG00000021078	--	--	74558427	74628366	-	7021	upstream
chr2	ALDBSSCT0000006328	ALDBSSCG0000003870	--	Annotated_lncRNA	74635388	74641394	-	ENSSSCT00000026522	ENSSSCG00000021078	--	--	74558427	74628366	-	7021	upstream
chr12	ALDBSSCT0000002430	ALDBSSCG0000001471	--	Annotated_lncRNA	38344990	38356842	-	ENSSSCT00000031698	ENSSSCG00000027060	TBX2	T-box 2 [Source:HGNC Symbol;Acc:HGNC:11597]	38328615	38338207	-	6782	upstream
chr12	ALDBSSCT0000002435	ALDBSSCG0000001474	--	Annotated_lncRNA	39643197	39654759	-	ENSSSCT00000032087	ENSSSCG00000023186	CA4	carbonic anhydrase IV [Source:HGNC Symbol;Acc:HGNC:1375]	39632792	39642292	+	904	downstream
chr18	ALDBSSCT0000005656	ALDBSSCG0000003431	--	Annotated_lncRNA	15795940	15798343	-	ENSSSCT00000018011	ENSSSCG00000016541	SLC35B4	solute carrier family 35 member B4 [Source:HGNC Symbol;Acc:HGNC:20584]	15801760	15821049	-	3416	downstream
chr18	ALDBSSCT0000005656	ALDBSSCG0000003431	--	Annotated_lncRNA	15795940	15798343	-	ENSSSCT00000031824	ENSSSCG00000016541	SLC35B4	solute carrier family 35 member B4 [Source:HGNC Symbol;Acc:HGNC:20584]	15801760	15820749	-	3416	downstream
chr18	LNC_001119	XLOC_067280	--	Novel_lncRNA	31004112	31036817	-	ENSSSCT00000018105	ENSSSCG00000016629	--	--	31038663	31232616	-	1845	downstream
chr18	LNC_001118	XLOC_067115	--	Novel_lncRNA	19788193	19802014	-	ENSSSCT00000018035	ENSSSCG00000016565	ZC3HC1	zinc finger C3HC-type containing 1 [Source:HGNC Symbol;Acc:HGNC:29913]	19802362	19814910	-	347	downstream
chr18	LNC_001118	XLOC_067115	--	Novel_lncRNA	19788193	19802014	-	ENSSSCT00000028385	ENSSSCG00000016565	ZC3HC1	zinc finger C3HC-type containing 1 [Source:HGNC Symbol;Acc:HGNC:29913]	19802362	19814910	-	347	downstream
chr1	LNC_000414	XLOC_025783	--	Novel_lncRNA	230574739	230576032	-	ENSSSCT00000005713	ENSSSCG00000005182	--	--	230579087	230677064	-	3054	downstream
chr1	LNC_000413	XLOC_025610	--	Novel_lncRNA	224782565	224787728	-	ENSSSCT00000033639	ENSSSCG00000030909	IFN-DELTA-3	-	224787630	224788146	+	-99	antisense
chr1	LNC_000413	XLOC_025610	--	Novel_lncRNA	224782565	224787728	-	ENSSSCT00000027215	ENSSSCG00000027162	--	--	224730487	224801189	+	-5164	antisense
chr1	LNC_000412	XLOC_025597	--	Novel_lncRNA	223956318	223960161	-	ENSSSCT00000005658	ENSSSCG00000005132	CDKN2B	cyclin dependent kinase inhibitor 2B [Source:HGNC Symbol;Acc:HGNC:1788]	223956057	223958921	+	-2604	antisense
chr1	LNC_000418	XLOC_025981	--	Novel_lncRNA	245474028	245486440	-	ENSSSCT00000005766	ENSSSCG00000005232	SMARCA2	SWI/SNF related, matrix associated, actin dependent regulator of chromatin, subfamily a, member 2 [Source:HGNC Symbol;Acc:HGNC:11098]	245489496	245666198	-	3055	downstream
chr16	ALDBSSCT0000005012	ALDBSSCG0000003025	--	Annotated_lncRNA	58016132	58036798	-	ENSSSCT00000018518	ENSSSCG00000017006	LCP2	lymphocyte cytosolic protein 2 [Source:HGNC Symbol;Acc:HGNC:6529]	58039300	58082197	+	2501	upstream
chr2	LNC_001202	XLOC_071715	--	Novel_lncRNA	775509	779448	-	ENSSSCT00000027291	ENSSSCG00000028106	--	--	783613	793495	-	4164	downstream
chr2	LNC_001202	XLOC_071715	--	Novel_lncRNA	775509	779448	-	ENSSSCT00000014054	ENSSSCG00000012858	--	--	776688	777611	+	-924	antisense
chr2	LNC_001201	XLOC_071696	--	Novel_lncRNA	525417	527593	-	ENSSSCT00000014053	ENSSSCG00000012857	CARS	cysteinyl-tRNA synthetase [Source:HGNC Symbol;Acc:HGNC:1493]	494866	524106	-	1310	upstream
chr2	LNC_001201	XLOC_071696	--	Novel_lncRNA	525417	527593	-	ENSSSCT00000014057	ENSSSCG00000012861	--	--	535662	546744	-	8068	downstream
chr2	LNC_001200	XLOC_071526	--	Novel_lncRNA	155275908	155278406	+	ENSSSCT00000015758	ENSSSCG00000014418	--	--	155287714	155320657	-	9307	downstream
chr2	LNC_001206	XLOC_072158	--	Novel_lncRNA	15596490	15601560	-	ENSSSCT00000031270	ENSSSCG00000029415	--	--	15594810	15595739	-	750	upstream
chr2	LNC_001205	XLOC_071909	--	Novel_lncRNA	6185246	6189003	-	ENSSSCT00000014212	ENSSSCG00000013001	MRPL49	mitochondrial ribosomal protein L49 [Source:RefSeq peptide;Acc:NP_001231942]	6198564	6203040	-	9560	downstream
chr2	LNC_001205	XLOC_071909	--	Novel_lncRNA	6185246	6189003	-	ENSSSCT00000027683	ENSSSCG00000027057	SYVN1	synoviolin 1 [Source:HGNC Symbol;Acc:HGNC:20738]	6192447	6200950	+	3443	upstream
chr2	LNC_001204	XLOC_071897	--	Novel_lncRNA	6165762	6191356	-	ENSSSCT00000014212	ENSSSCG00000013001	MRPL49	mitochondrial ribosomal protein L49 [Source:RefSeq peptide;Acc:NP_001231942]	6198564	6203040	-	7207	downstream
chr2	LNC_001204	XLOC_071897	--	Novel_lncRNA	6165762	6191356	-	ENSSSCT00000027683	ENSSSCG00000027057	SYVN1	synoviolin 1 [Source:HGNC Symbol;Acc:HGNC:20738]	6192447	6200950	+	1090	upstream
chr1	LNC_000309	XLOC_017943	--	Novel_lncRNA	94344756	94383717	+	ENSSSCT00000004924	ENSSSCG00000004458	TPBG	trophoblast glycoprotein [Source:HGNC Symbol;Acc:HGNC:12004]	94386961	94388220	-	3243	downstream
chr7	ALDBSSCT0000009752	ALDBSSCG0000005950	--	Annotated_lncRNA	45106791	45111186	+	ENSSSCT00000001899	ENSSSCG00000001700	SLC29A1	solute carrier family 29 member 1 (Augustine blood group) [Source:HGNC Symbol;Acc:HGNC:11003]	45091212	45104205	+	2585	downstream
chr7	ALDBSSCT0000009752	ALDBSSCG0000005950	--	Annotated_lncRNA	45106791	45111186	+	ENSSSCT00000001901	ENSSSCG00000001701	HSP90AB1	heat shock protein 90 alpha family class B member 1 [Source:HGNC Symbol;Acc:HGNC:5258]	45113269	45123953	+	2082	upstream
chr7	ALDBSSCT0000009752	ALDBSSCG0000005950	--	Annotated_lncRNA	45106791	45111186	+	ENSSSCT00000001902	ENSSSCG00000001702	SLC35B2	solute carrier family 35 member B2 [Source:HGNC Symbol;Acc:HGNC:16872]	45120502	45123466	-	9315	downstream
chr1	LNC_000301	XLOC_017463	--	Novel_lncRNA	48502400	48519351	+	ENSSSCT00000029903	ENSSSCG00000030488	--	--	48488864	48498362	+	4037	downstream
chr1	LNC_000300	XLOC_017463	--	Novel_lncRNA	48499518	48515565	+	ENSSSCT00000029903	ENSSSCG00000030488	--	--	48488864	48498362	+	1155	downstream
chr1	LNC_000305	XLOC_017814	--	Novel_lncRNA	84741333	84760943	+	ENSSSCT00000004877	ENSSSCG00000004414	CD164	CD164 molecule [Source:HGNC Symbol;Acc:HGNC:1632]	84719535	84735860	-	5472	upstream
chr1	LNC_000305	XLOC_017814	--	Novel_lncRNA	84741333	84760943	+	ENSSSCT00000033167	ENSSSCG00000004414	CD164	CD164 molecule [Source:HGNC Symbol;Acc:HGNC:1632]	84719537	84735839	-	5493	upstream
chr1	LNC_000304	XLOC_017543	--	Novel_lncRNA	59092608	59101704	+	ENSSSCT00000026479	ENSSSCG00000004281	KCNQ5	potassium voltage-gated channel subfamily Q member 5 [Source:HGNC Symbol;Acc:HGNC:6299]	59101858	59277108	+	153	upstream
chr1	LNC_000307	XLOC_017861	--	Novel_lncRNA	87032367	87043057	+	ENSSSCT00000004883	ENSSSCG00000004420	TRAF3IP2	TRAF3 interacting protein 2 [Source:HGNC Symbol;Acc:HGNC:1343]	87048040	87102035	-	4982	downstream
chr18	ALDBSSCT0000005744	ALDBSSCG0000003483	--	Annotated_lncRNA	52032613	52035509	-	ENSSSCT00000018195	ENSSSCG00000016714	CYCS	Cytochrome c [Source:UniProtKB/Swiss-Prot;Acc:P62895]	52036068	52038371	+	558	upstream
GL893262.1	LNC_000053	XLOC_002997	--	Novel_lncRNA	16165	16613	-	ENSSSCT00000025403	ENSSSCG00000025886	--	--	1261	11647	-	4517	upstream
chr4	ALDBSSCT0000007409	ALDBSSCG0000004489	--	Annotated_lncRNA	998208	1005683	+	ENSSSCT00000007616	ENSSSCG00000006951	--	--	990926	991553	-	6654	upstream
chr4	ALDBSSCT0000007404	ALDBSSCG0000004487	--	Annotated_lncRNA	187092	193797	+	ENSSSCT00000033747	ENSSSCG00000029830	RPL8	ribosomal protein L8 [Source:HGNC Symbol;Acc:HGNC:10368]	200005	207408	+	6207	upstream
chr4	ALDBSSCT0000007404	ALDBSSCG0000004487	--	Annotated_lncRNA	187092	193797	+	ENSSSCT00000006469	ENSSSCG00000005890	ZNF7	zinc finger protein 7 [Source:HGNC Symbol;Acc:HGNC:13139]	176559	184751	-	2340	upstream
chr4	ALDBSSCT0000007405	ALDBSSCG0000004487	--	Annotated_lncRNA	187111	193797	+	ENSSSCT00000033747	ENSSSCG00000029830	RPL8	ribosomal protein L8 [Source:HGNC Symbol;Acc:HGNC:10368]	200005	207408	+	6207	upstream
chr4	ALDBSSCT0000007405	ALDBSSCG0000004487	--	Annotated_lncRNA	187111	193797	+	ENSSSCT00000006469	ENSSSCG00000005890	ZNF7	zinc finger protein 7 [Source:HGNC Symbol;Acc:HGNC:13139]	176559	184751	-	2359	upstream
chr17	ALDBSSCT0000005274	ALDBSSCG0000003184	--	Annotated_lncRNA	6259655	6268542	-	ENSSSCT00000007659	ENSSSCG00000006994	--	--	6277561	6295164	-	9018	downstream
chr17	ALDBSSCT0000005277	ALDBSSCG0000003187	--	Annotated_lncRNA	9707735	9710600	-	ENSSSCT00000007671	ENSSSCG00000007003	--	--	9688347	9704973	+	2761	downstream
chr17	ALDBSSCT0000005277	ALDBSSCG0000003187	--	Annotated_lncRNA	9707735	9710600	-	ENSSSCT00000007672	ENSSSCG00000007004	INTS10	integrator complex subunit 10 [Source:HGNC Symbol;Acc:HGNC:25548]	9711448	9756430	-	847	downstream
chr4	ENSSSCT00000027578	ENSSSCG00000026924	KIFC2	Annotated_lncRNA	415603	422886	-	ENSSSCT00000029873	ENSSSCG00000005902	FOXH1	forkhead box H1 [Source:HGNC Symbol;Acc:HGNC:3814]	413951	415250	+	352	downstream
chr4	ENSSSCT00000027578	ENSSSCG00000026924	KIFC2	Annotated_lncRNA	415603	422886	-	ENSSSCT00000029061	ENSSSCG00000027076	CYHR1	cysteine and histidine rich 1 [Source:HGNC Symbol;Acc:HGNC:17806]	424102	439084	+	1215	upstream
chr4	ENSSSCT00000027578	ENSSSCG00000026924	KIFC2	Annotated_lncRNA	415603	422886	-	ENSSSCT00000006481	ENSSSCG00000005902	FOXH1	forkhead box H1 [Source:HGNC Symbol;Acc:HGNC:3814]	414037	415480	+	122	downstream
JH118725.1	LNC_000246	XLOC_015082	--	Novel_lncRNA	2175	14507	+	ENSSSCT00000024580	ENSSSCG00000029008	--	--	22528	32823	-	8020	downstream
chr11	ALDBSSCT0000001802	ALDBSSCG0000001089	--	Annotated_lncRNA	76028683	76030131	+	ENSSSCT00000010437	ENSSSCG00000009519	CLYBL	citrate lyase beta like [Source:HGNC Symbol;Acc:HGNC:18355]	75995343	76025089	+	3593	downstream
JH118640.1	LNC_000243	XLOC_014682	--	Novel_lncRNA	110453	118848	-	ENSSSCT00000025037	ENSSSCG00000025851	--	--	48461	112123	+	-1671	antisense
JH118757.1	LNC_000248	XLOC_015244	--	Novel_lncRNA	185127	188340	+	ENSSSCT00000022545	ENSSSCG00000021562	PLXNA4	plexin A4 [Source:HGNC Symbol;Acc:HGNC:9102]	92319	183984	-	1142	upstream
JH118757.1	LNC_000249	XLOC_015244	--	Novel_lncRNA	185874	191117	+	ENSSSCT00000022545	ENSSSCG00000021562	PLXNA4	plexin A4 [Source:HGNC Symbol;Acc:HGNC:9102]	92319	183984	-	1889	upstream
chr8	LNC_001843	XLOC_109414	--	Novel_lncRNA	12607311	12621144	-	ENSSSCT00000009570	ENSSSCG00000008747	NCAPG	non-SMC condensin I complex subunit G [Source:HGNC Symbol;Acc:HGNC:24304]	12560087	12607267	+	43	downstream
chr15	LNC_000955	XLOC_057015	--	Novel_lncRNA	45444196	45491716	-	ENSSSCT00000017172	ENSSSCG00000015771	NEIL3	nei like DNA glycosylase 3 [Source:HGNC Symbol;Acc:HGNC:24573]	45495291	45542560	+	3574	upstream
chr6	ALDBSSCT0000009324	ALDBSSCG0000005685	--	Annotated_lncRNA	46525874	46534555	-	ENSSSCT00000003408	ENSSSCG00000003071	ZNF404	zinc finger protein 404 [Source:HGNC Symbol;Acc:HGNC:19417]	46511270	46517962	-	7911	upstream
chr2	ENSSSCT00000021958	ENSSSCG00000020363	7SK	Annotated_lncRNA	81351131	81351408	+	ENSSSCT00000015323	ENSSSCG00000014028	CLK4	CDC like kinase 4 [Source:HGNC Symbol;Acc:HGNC:13659]	81344460	81369483	+	-278	sense_overlapping
chr12	ALDBSSCT0000002453	ALDBSSCG0000001486	--	Annotated_lncRNA	44334743	44344300	-	ENSSSCT00000019299	ENSSSCG00000017732	ZNF207	zinc finger protein 207 [Source:HGNC Symbol;Acc:HGNC:12998]	44345121	44362552	-	820	downstream
chr1	ALDBSSCT0000000773	ALDBSSCG0000000466	--	Annotated_lncRNA	103294374	103334163	-	ENSSSCT00000004956	ENSSSCG00000004485	CD109	CD109 molecule [Source:HGNC Symbol;Acc:HGNC:21685]	103136948	103292012	-	2361	upstream
chr1	ALDBSSCT0000000773	ALDBSSCG0000000466	--	Annotated_lncRNA	103294374	103334163	-	ENSSSCT00000035901	ENSSSCG00000004485	CD109	CD109 molecule [Source:HGNC Symbol;Acc:HGNC:21685]	103132170	103292068	-	2305	upstream
chr1	ALDBSSCT0000000773	ALDBSSCG0000000466	--	Annotated_lncRNA	103294374	103334163	-	ENSSSCT00000004957	ENSSSCG00000004486	SLC17A5	solute carrier family 17 member 5 [Source:HGNC Symbol;Acc:HGNC:10933]	103338141	103394056	+	3977	upstream
chr1	ALDBSSCT0000000773	ALDBSSCG0000000466	--	Annotated_lncRNA	103294374	103334163	-	ENSSSCT00000035127	ENSSSCG00000004485	CD109	CD109 molecule [Source:HGNC Symbol;Acc:HGNC:21685]	103137101	103292068	-	2305	upstream
chr11	ALDBSSCT0000002100	ALDBSSCG0000001263	--	Annotated_lncRNA	86485295	86488987	-	ENSSSCT00000010484	ENSSSCG00000009563	TMCO3	transmembrane and coiled-coil domains 3 [Source:HGNC Symbol;Acc:HGNC:20329]	86442655	86476521	+	8773	downstream
chr11	ALDBSSCT0000002100	ALDBSSCG0000001263	--	Annotated_lncRNA	86485295	86488987	-	ENSSSCT00000010480	ENSSSCG00000009560	TFDP1	transcription factor Dp-1 [Source:HGNC Symbol;Acc:HGNC:11749]	86495533	86510641	+	6545	upstream
chr1	ALDBSSCT0000000776	ALDBSSCG0000000469	--	Annotated_lncRNA	108470855	108471627	-	ENSSSCT00000030202	ENSSSCG00000027951	--	--	108480390	108482264	+	8762	upstream
chr5	LNC_001519	XLOC_089251	--	Novel_lncRNA	63826794	63837098	+	ENSSSCT00000000676	ENSSSCG00000000629	-	basic proline-rich protein precursor [Source:RefSeq peptide;Acc:NP_001092050]	63816468	63819555	+	7238	downstream
chr5	LNC_001519	XLOC_089251	--	Novel_lncRNA	63826794	63837098	+	ENSSSCT00000000675	ENSSSCG00000000629	-	basic proline-rich protein precursor [Source:RefSeq peptide;Acc:NP_001092050]	63816468	63819555	+	7238	downstream
chr10	ALDBSSCT0000001482	ALDBSSCG0000000898	--	Annotated_lncRNA	32946840	33037285	-	ENSSSCT00000011987	ENSSSCG00000010952	ZCCHC6	zinc finger CCHC-type containing 6 [Source:HGNC Symbol;Acc:HGNC:25817]	33038181	33105176	+	895	upstream
chr10	ALDBSSCT0000001482	ALDBSSCG0000000898	--	Annotated_lncRNA	32946840	33037285	-	ENSSSCT00000035632	ENSSSCG00000010952	ZCCHC6	zinc finger CCHC-type containing 6 [Source:HGNC Symbol;Acc:HGNC:25817]	33038189	33103965	+	903	upstream
chr10	ALDBSSCT0000001482	ALDBSSCG0000000898	--	Annotated_lncRNA	32946840	33037285	-	ENSSSCT00000035769	ENSSSCG00000010952	ZCCHC6	zinc finger CCHC-type containing 6 [Source:HGNC Symbol;Acc:HGNC:25817]	33038855	33039969	+	1569	upstream
chr3	ENSSSCT00000030586	ENSSSCG00000028766	Metazoa_SRP	Annotated_lncRNA	106666010	106666294	+	ENSSSCT00000026462	ENSSSCG00000024293	--	--	106662022	106677813	+	-285	sense_overlapping
chr1	ALDBSSCT0000000170	ALDBSSCG0000000103	--	Annotated_lncRNA	83129170	83135612	+	ENSSSCT00000004841	ENSSSCG00000004380	--	--	83109165	83124404	+	4765	downstream
chr1	ALDBSSCT0000000171	ALDBSSCG0000000104	--	Annotated_lncRNA	84560285	84564704	+	ENSSSCT00000004854	ENSSSCG00000004391	CEP57L1	centrosomal protein 57 like 1 [Source:HGNC Symbol;Acc:HGNC:21561]	84502215	84559202	+	1082	downstream
chr1	ALDBSSCT0000000171	ALDBSSCG0000000104	--	Annotated_lncRNA	84560285	84564704	+	ENSSSCT00000029999	ENSSSCG00000004391	CEP57L1	centrosomal protein 57 like 1 [Source:HGNC Symbol;Acc:HGNC:21561]	84502215	84559202	+	1082	downstream
chr10	ALDBSSCT0000001489	ALDBSSCG0000000903	--	Annotated_lncRNA	35096130	35102584	-	ENSSSCT00000025854	ENSSSCG00000022760	HNRNPK	heterogeneous nuclear ribonucleoprotein K [Source:HGNC Symbol;Acc:HGNC:5044]	35105049	35115115	+	2464	upstream
chr3	ALDBSSCT0000006722	ALDBSSCG0000004101	--	Annotated_lncRNA	54960494	54961251	+	ENSSSCT00000008940	ENSSSCG00000008163	IL1R2	-	54939544	54952578	+	7915	downstream
chr8	LNC_001835	XLOC_108851	--	Novel_lncRNA	141583969	141584982	+	ENSSSCT00000029989	ENSSSCG00000026655	PTPN13	protein tyrosine phosphatase, non-receptor type 13 [Source:HGNC Symbol;Acc:HGNC:9646]	141369845	141583918	-	50	upstream
chr7	LNC_001697	XLOC_100837	--	Novel_lncRNA	17855387	17858332	+	ENSSSCT00000001176	ENSSSCG00000001081	SOX4	SRY-box 4 [Source:HGNC Symbol;Acc:HGNC:11200]	17852990	17854423	+	963	downstream
chr4	ALDBSSCT0000008087	ALDBSSCG0000004908	--	Annotated_lncRNA	110224538	110255345	-	ENSSSCT00000034808	ENSSSCG00000006703	PRKAB2	protein kinase AMP-activated non-catalytic subunit beta 2 [Source:HGNC Symbol;Acc:HGNC:9379]	110208123	110219705	+	4832	downstream
chr4	ALDBSSCT0000008087	ALDBSSCG0000004908	--	Annotated_lncRNA	110224538	110255345	-	ENSSSCT00000007342	ENSSSCG00000006703	PRKAB2	protein kinase AMP-activated non-catalytic subunit beta 2 [Source:HGNC Symbol;Acc:HGNC:9379]	110208095	110219705	+	4832	downstream
chr4	ALDBSSCT0000008087	ALDBSSCG0000004908	--	Annotated_lncRNA	110224538	110255345	-	ENSSSCT00000032787	ENSSSCG00000006703	PRKAB2	protein kinase AMP-activated non-catalytic subunit beta 2 [Source:HGNC Symbol;Acc:HGNC:9379]	110208095	110219822	+	4715	downstream
chr4	ALDBSSCT0000008087	ALDBSSCG0000004908	--	Annotated_lncRNA	110224538	110255345	-	ENSSSCT00000034207	ENSSSCG00000006703	PRKAB2	protein kinase AMP-activated non-catalytic subunit beta 2 [Source:HGNC Symbol;Acc:HGNC:9379]	110208121	110217459	+	7078	downstream
chr4	ALDBSSCT0000008087	ALDBSSCG0000004908	--	Annotated_lncRNA	110224538	110255345	-	ENSSSCT00000036163	ENSSSCG00000006703	PRKAB2	protein kinase AMP-activated non-catalytic subunit beta 2 [Source:HGNC Symbol;Acc:HGNC:9379]	110207628	110219705	+	4832	downstream
chr18	LNC_001107	XLOC_066715	--	Novel_lncRNA	5388633	5400366	-	ENSSSCT00000029123	ENSSSCG00000028615	--	--	5402347	5408431	+	1980	upstream
chr16	ALDBSSCT0000005047	ALDBSSCG0000003044	--	Annotated_lncRNA	72012065	72014695	-	ENSSSCT00000026943	ENSSSCG00000028875	HAVCR2	hepatitis A virus cellular receptor 2 [Source:HGNC Symbol;Acc:HGNC:18437]	71986890	72008135	-	3929	upstream
chr5	LNC_001514	XLOC_088855	--	Novel_lncRNA	45582695	45597856	+	ENSSSCT00000032100	ENSSSCG00000030616	KIAA1551	KIAA1551 [Source:HGNC Symbol;Acc:HGNC:25559]	45546617	45582548	-	146	upstream
chr7	ALDBSSCT0000010126	ALDBSSCG0000006167	--	Annotated_lncRNA	36569261	36571838	-	ENSSSCT00000001732	ENSSSCG00000001554	SRPK1	SRSF protein kinase 1 [Source:HGNC Symbol;Acc:HGNC:11305]	36575699	36638641	-	3860	downstream
chr7	ALDBSSCT0000010126	ALDBSSCG0000006167	--	Annotated_lncRNA	36569261	36571838	-	ENSSSCT00000001731	ENSSSCG00000001553	LHFPL5	lipoma HMGIC fusion partner-like 5 [Source:HGNC Symbol;Acc:HGNC:21253]	36552501	36560440	+	8820	downstream
chr7	ALDBSSCT0000010124	ALDBSSCG0000006166	--	Annotated_lncRNA	36501373	36517529	-	ENSSSCT00000001728	ENSSSCG00000001550	ARMC12	armadillo repeat containing 12 [Source:HGNC Symbol;Acc:HGNC:21099]	36518830	36529646	+	1300	upstream
chr7	ALDBSSCT0000010125	ALDBSSCG0000006166	--	Annotated_lncRNA	36503324	36513546	-	ENSSSCT00000001728	ENSSSCG00000001550	ARMC12	armadillo repeat containing 12 [Source:HGNC Symbol;Acc:HGNC:21099]	36518830	36529646	+	5283	upstream
chr1	ALDBSSCT0000000991	ALDBSSCG0000000607	--	Annotated_lncRNA	256312508	256313537	-	ENSSSCT00000005813	ENSSSCG00000005278	PRUNE2	prune homolog 2 [Source:HGNC Symbol;Acc:HGNC:25209]	256320554	256399971	-	7016	downstream
chr1	ALDBSSCT0000000420	ALDBSSCG0000000248	--	Annotated_lncRNA	212183975	212186249	+	ENSSSCT00000005619	ENSSSCG00000005097	SNAPC1	small nuclear RNA activating complex polypeptide 1 [Source:HGNC Symbol;Acc:HGNC:11134]	212192279	212218544	+	6029	upstream
chr1	ALDBSSCT0000000420	ALDBSSCG0000000248	--	Annotated_lncRNA	212183975	212186249	+	ENSSSCT00000005618	ENSSSCG00000005096	HIF1A	hypoxia inducible factor 1, alpha subunit (basic helix-loop-helix transcription factor) [Source:HGNC Symbol;Acc:HGNC:4910]	212130958	212179888	+	4086	downstream
chr9	ALDBSSCT0000011462	ALDBSSCG0000006974	--	Annotated_lncRNA	21859589	21861895	-	ENSSSCT00000016263	ENSSSCG00000014907	CREBZF	CREB/ATF bZIP transcription factor [Source:HGNC Symbol;Acc:HGNC:24905]	21863871	21864935	-	1975	downstream
chr9	ALDBSSCT0000011462	ALDBSSCG0000006974	--	Annotated_lncRNA	21859589	21861895	-	ENSSSCT00000023686	ENSSSCG00000025187	TMEM126A	transmembrane protein 126A [Source:HGNC Symbol;Acc:HGNC:25382]	21846378	21858442	+	1146	downstream
chr15	LNC_000932	XLOC_055613	--	Novel_lncRNA	122430518	122443992	+	ENSSSCT00000017573	ENSSSCG00000016140	FZD5	frizzled class receptor 5 [Source:HGNC Symbol;Acc:HGNC:4043]	122425805	122428979	+	1538	downstream
chr15	LNC_000932	XLOC_055613	--	Novel_lncRNA	122430518	122443992	+	ENSSSCT00000031210	ENSSSCG00000024696	CCNYL1	cyclin Y like 1 [Source:HGNC Symbol;Acc:HGNC:26868]	122436419	122471437	-	-7574	antisense
chr15	LNC_000933	XLOC_055613	--	Novel_lncRNA	122430519	122443992	+	ENSSSCT00000017573	ENSSSCG00000016140	FZD5	frizzled class receptor 5 [Source:HGNC Symbol;Acc:HGNC:4043]	122425805	122428979	+	1539	downstream
chr15	LNC_000933	XLOC_055613	--	Novel_lncRNA	122430519	122443992	+	ENSSSCT00000031210	ENSSSCG00000024696	CCNYL1	cyclin Y like 1 [Source:HGNC Symbol;Acc:HGNC:26868]	122436419	122471437	-	-7574	antisense
chr15	LNC_000930	XLOC_054955	--	Novel_lncRNA	93741269	93749977	+	ENSSSCT00000017421	ENSSSCG00000016000	PLEKHA3	pleckstrin homology domain containing A3 [Source:HGNC Symbol;Acc:HGNC:14338]	93718328	93740818	+	450	downstream
chr15	LNC_000937	XLOC_055999	--	Novel_lncRNA	147571059	147578484	+	ENSSSCT00000017749	ENSSSCG00000016299	--	--	147580465	147591224	-	1980	downstream
chrX	LNC_002004	XLOC_119958	--	Novel_lncRNA	44558381	44567591	+	ENSSSCT00000035071	ENSSSCG00000012262	KDM6A	lysine demethylase 6A [Source:HGNC Symbol;Acc:HGNC:12637]	44568029	44704502	+	437	upstream
chrX	LNC_002004	XLOC_119958	--	Novel_lncRNA	44558381	44567591	+	ENSSSCT00000034832	ENSSSCG00000012262	KDM6A	lysine demethylase 6A [Source:HGNC Symbol;Acc:HGNC:12637]	44568029	44703904	+	437	upstream
chrX	LNC_002004	XLOC_119958	--	Novel_lncRNA	44558381	44567591	+	ENSSSCT00000036305	ENSSSCG00000012262	KDM6A	lysine demethylase 6A [Source:HGNC Symbol;Acc:HGNC:12637]	44568029	44703904	+	437	upstream
chrX	LNC_002004	XLOC_119958	--	Novel_lncRNA	44558381	44567591	+	ENSSSCT00000013409	ENSSSCG00000012262	KDM6A	lysine demethylase 6A [Source:HGNC Symbol;Acc:HGNC:12637]	44567692	44704826	+	100	upstream
chrX	LNC_002004	XLOC_119958	--	Novel_lncRNA	44558381	44567591	+	ENSSSCT00000034861	ENSSSCG00000012262	KDM6A	lysine demethylase 6A [Source:HGNC Symbol;Acc:HGNC:12637]	44568029	44704591	+	437	upstream
chrX	LNC_002004	XLOC_119958	--	Novel_lncRNA	44558381	44567591	+	ENSSSCT00000035936	ENSSSCG00000012262	KDM6A	lysine demethylase 6A [Source:HGNC Symbol;Acc:HGNC:12637]	44568029	44703904	+	437	upstream
chrX	LNC_002005	XLOC_120016	--	Novel_lncRNA	48084913	48088774	+	ENSSSCT00000035173	ENSSSCG00000012293	PRICKLE3	prickle planar cell polarity protein 3 [Source:HGNC Symbol;Acc:HGNC:6645]	48066410	48078254	-	6658	upstream
chrX	LNC_002005	XLOC_120016	--	Novel_lncRNA	48084913	48088774	+	ENSSSCT00000034645	ENSSSCG00000012292	SYP	synaptophysin [Source:HGNC Symbol;Acc:HGNC:11506]	48086297	48094623	-	-2478	antisense
chrX	LNC_002005	XLOC_120016	--	Novel_lncRNA	48084913	48088774	+	ENSSSCT00000036662	ENSSSCG00000012293	PRICKLE3	prickle planar cell polarity protein 3 [Source:HGNC Symbol;Acc:HGNC:6645]	48066375	48076996	-	7916	upstream
chrX	LNC_002005	XLOC_120016	--	Novel_lncRNA	48084913	48088774	+	ENSSSCT00000013441	ENSSSCG00000012292	SYP	synaptophysin [Source:HGNC Symbol;Acc:HGNC:11506]	48080132	48094633	-	-3862	antisense
chrX	LNC_002005	XLOC_120016	--	Novel_lncRNA	48084913	48088774	+	ENSSSCT00000032938	ENSSSCG00000012292	SYP	synaptophysin [Source:HGNC Symbol;Acc:HGNC:11506]	48081667	48094606	-	-3862	antisense
chrX	LNC_002005	XLOC_120016	--	Novel_lncRNA	48084913	48088774	+	ENSSSCT00000035417	ENSSSCG00000012292	SYP	synaptophysin [Source:HGNC Symbol;Acc:HGNC:11506]	48084126	48094629	-	-3862	antisense
chrX	LNC_002005	XLOC_120016	--	Novel_lncRNA	48084913	48088774	+	ENSSSCT00000013442	ENSSSCG00000012293	PRICKLE3	prickle planar cell polarity protein 3 [Source:HGNC Symbol;Acc:HGNC:6645]	48066410	48078264	-	6648	upstream
chrX	LNC_002006	XLOC_120016	--	Novel_lncRNA	48084913	48088774	+	ENSSSCT00000035173	ENSSSCG00000012293	PRICKLE3	prickle planar cell polarity protein 3 [Source:HGNC Symbol;Acc:HGNC:6645]	48066410	48078254	-	6658	upstream
chrX	LNC_002006	XLOC_120016	--	Novel_lncRNA	48084913	48088774	+	ENSSSCT00000034645	ENSSSCG00000012292	SYP	synaptophysin [Source:HGNC Symbol;Acc:HGNC:11506]	48086297	48094623	-	-2478	antisense
chrX	LNC_002006	XLOC_120016	--	Novel_lncRNA	48084913	48088774	+	ENSSSCT00000036662	ENSSSCG00000012293	PRICKLE3	prickle planar cell polarity protein 3 [Source:HGNC Symbol;Acc:HGNC:6645]	48066375	48076996	-	7916	upstream
chrX	LNC_002006	XLOC_120016	--	Novel_lncRNA	48084913	48088774	+	ENSSSCT00000013441	ENSSSCG00000012292	SYP	synaptophysin [Source:HGNC Symbol;Acc:HGNC:11506]	48080132	48094633	-	-3862	antisense
chrX	LNC_002006	XLOC_120016	--	Novel_lncRNA	48084913	48088774	+	ENSSSCT00000032938	ENSSSCG00000012292	SYP	synaptophysin [Source:HGNC Symbol;Acc:HGNC:11506]	48081667	48094606	-	-3862	antisense
chrX	LNC_002006	XLOC_120016	--	Novel_lncRNA	48084913	48088774	+	ENSSSCT00000035417	ENSSSCG00000012292	SYP	synaptophysin [Source:HGNC Symbol;Acc:HGNC:11506]	48084126	48094629	-	-3862	antisense
chrX	LNC_002006	XLOC_120016	--	Novel_lncRNA	48084913	48088774	+	ENSSSCT00000013442	ENSSSCG00000012293	PRICKLE3	prickle planar cell polarity protein 3 [Source:HGNC Symbol;Acc:HGNC:6645]	48066410	48078264	-	6648	upstream
chrX	LNC_002007	XLOC_120016	--	Novel_lncRNA	48086330	48092056	+	ENSSSCT00000035173	ENSSSCG00000012293	PRICKLE3	prickle planar cell polarity protein 3 [Source:HGNC Symbol;Acc:HGNC:6645]	48066410	48078254	-	8075	upstream
chrX	LNC_002007	XLOC_120016	--	Novel_lncRNA	48086330	48092056	+	ENSSSCT00000034645	ENSSSCG00000012292	SYP	synaptophysin [Source:HGNC Symbol;Acc:HGNC:11506]	48086297	48094623	-	-5727	antisense
chrX	LNC_002007	XLOC_120016	--	Novel_lncRNA	48086330	48092056	+	ENSSSCT00000036662	ENSSSCG00000012293	PRICKLE3	prickle planar cell polarity protein 3 [Source:HGNC Symbol;Acc:HGNC:6645]	48066375	48076996	-	9333	upstream
chrX	LNC_002007	XLOC_120016	--	Novel_lncRNA	48086330	48092056	+	ENSSSCT00000013441	ENSSSCG00000012292	SYP	synaptophysin [Source:HGNC Symbol;Acc:HGNC:11506]	48080132	48094633	-	-5727	antisense
chrX	LNC_002007	XLOC_120016	--	Novel_lncRNA	48086330	48092056	+	ENSSSCT00000032938	ENSSSCG00000012292	SYP	synaptophysin [Source:HGNC Symbol;Acc:HGNC:11506]	48081667	48094606	-	-5727	antisense
chrX	LNC_002007	XLOC_120016	--	Novel_lncRNA	48086330	48092056	+	ENSSSCT00000035417	ENSSSCG00000012292	SYP	synaptophysin [Source:HGNC Symbol;Acc:HGNC:11506]	48084126	48094629	-	-5727	antisense
chrX	LNC_002007	XLOC_120016	--	Novel_lncRNA	48086330	48092056	+	ENSSSCT00000013442	ENSSSCG00000012293	PRICKLE3	prickle planar cell polarity protein 3 [Source:HGNC Symbol;Acc:HGNC:6645]	48066410	48078264	-	8065	upstream
chrX	LNC_002000	XLOC_119714	--	Novel_lncRNA	15323461	15331287	+	ENSSSCT00000013293	ENSSSCG00000012152	SCML1	sex comb on midleg-like 1 (Drosophila) [Source:HGNC Symbol;Acc:HGNC:10580]	15307034	15317312	+	6148	downstream
chrX	LNC_002002	XLOC_119736	--	Novel_lncRNA	19383833	19386506	+	ENSSSCT00000013308	ENSSSCG00000012167	PHEX	phosphate regulating endopeptidase homolog, X-linked [Source:HGNC Symbol;Acc:HGNC:8918]	19387692	19602389	+	1185	upstream
chrX	LNC_002002	XLOC_119736	--	Novel_lncRNA	19383833	19386506	+	ENSSSCT00000034419	ENSSSCG00000012167	PHEX	phosphate regulating endopeptidase homolog, X-linked [Source:HGNC Symbol;Acc:HGNC:8918]	19387210	19602421	+	703	upstream
chrX	LNC_002003	XLOC_119882	--	Novel_lncRNA	37400179	37414545	+	ENSSSCT00000036076	ENSSSCG00000012229	CYBB	cytochrome b-245 beta chain [Source:HGNC Symbol;Acc:HGNC:2578]	37355231	37391564	+	8614	downstream
chrX	LNC_002003	XLOC_119882	--	Novel_lncRNA	37400179	37414545	+	ENSSSCT00000013375	ENSSSCG00000012229	CYBB	cytochrome b-245 beta chain [Source:HGNC Symbol;Acc:HGNC:2578]	37303174	37392877	+	7301	downstream
chrX	LNC_002003	XLOC_119882	--	Novel_lncRNA	37400179	37414545	+	ENSSSCT00000034803	ENSSSCG00000012229	CYBB	cytochrome b-245 beta chain [Source:HGNC Symbol;Acc:HGNC:2578]	37355077	37392877	+	7301	downstream
chrX	LNC_002009	XLOC_120225	--	Novel_lncRNA	58749164	58752101	+	ENSSSCT00000027782	ENSSSCG00000028241	--	--	58756065	58763172	-	3963	downstream
chr9	ALDBSSCT0000011298	ALDBSSCG0000006861	--	Annotated_lncRNA	115582814	115602155	+	ENSSSCT00000022506	ENSSSCG00000029082	KMT2E	lysine methyltransferase 2E [Source:HGNC Symbol;Acc:HGNC:18541]	115608962	115726916	+	6806	upstream
chr16	ALDBSSCT0000004776	ALDBSSCG0000002906	--	Annotated_lncRNA	42882923	42910819	+	ENSSSCT00000025662	ENSSSCG00000027763	--	--	42832716	42874957	+	7965	downstream
chr16	ALDBSSCT0000004776	ALDBSSCG0000002906	--	Annotated_lncRNA	42882923	42910819	+	ENSSSCT00000018443	ENSSSCG00000016935	SMIM15	small integral membrane protein 15 [Source:HGNC Symbol;Acc:HGNC:33861]	42880067	42880291	-	2631	upstream
chr6	ALDBSSCT0000009443	ALDBSSCG0000005759	--	Annotated_lncRNA	82461972	82500396	-	ENSSSCT00000023741	ENSSSCG00000026650	--	--	82502648	82514854	-	2251	downstream
chr6	ALDBSSCT0000009334	ALDBSSCG0000005693	--	Annotated_lncRNA	51341554	51347518	-	ENSSSCT00000003570	ENSSSCG00000003215	SHANK1	SH3 and multiple ankyrin repeat domains 1 [Source:HGNC Symbol;Acc:HGNC:15474]	51349098	51395726	-	1579	downstream
chr6	ALDBSSCT0000009334	ALDBSSCG0000005693	--	Annotated_lncRNA	51341554	51347518	-	ENSSSCT00000003571	ENSSSCG00000003215	SHANK1	SH3 and multiple ankyrin repeat domains 1 [Source:HGNC Symbol;Acc:HGNC:15474]	51349098	51395726	-	1579	downstream
chr6	LNC_001684	XLOC_099809	--	Novel_lncRNA	137321058	137321793	-	ENSSSCT00000004221	ENSSSCG00000003814	EFCAB7	EF-hand calcium binding domain 7 [Source:HGNC Symbol;Acc:HGNC:29379]	137259293	137316747	-	4310	upstream
chr4	LNC_001441	XLOC_084572	--	Novel_lncRNA	136938818	136966203	+	ENSSSCT00000025161	ENSSSCG00000027251	CDC7	cell division cycle 7 [Source:HGNC Symbol;Acc:HGNC:1745]	136913190	136938642	+	175	downstream
chr4	LNC_001440	XLOC_084553	--	Novel_lncRNA	136577264	136579065	+	ENSSSCT00000025249	ENSSSCG00000029522	--	--	136586653	136592592	+	7587	upstream
chr4	LNC_001443	XLOC_084572	--	Novel_lncRNA	136938818	136966203	+	ENSSSCT00000025161	ENSSSCG00000027251	CDC7	cell division cycle 7 [Source:HGNC Symbol;Acc:HGNC:1745]	136913190	136938642	+	175	downstream
chr4	LNC_001442	XLOC_084572	--	Novel_lncRNA	136938818	136966203	+	ENSSSCT00000025161	ENSSSCG00000027251	CDC7	cell division cycle 7 [Source:HGNC Symbol;Acc:HGNC:1745]	136913190	136938642	+	175	downstream
chr4	LNC_001444	XLOC_084572	--	Novel_lncRNA	136938818	136966203	+	ENSSSCT00000025161	ENSSSCG00000027251	CDC7	cell division cycle 7 [Source:HGNC Symbol;Acc:HGNC:1745]	136913190	136938642	+	175	downstream
chr4	LNC_001447	XLOC_084672	--	Novel_lncRNA	141330593	141341313	+	ENSSSCT00000007590	ENSSSCG00000006928	LMO4	LIM domain only 4 [Source:HGNC Symbol;Acc:HGNC:6644]	141341709	141354291	-	395	downstream
chr4	LNC_001449	XLOC_084672	--	Novel_lncRNA	141335889	141341313	+	ENSSSCT00000007590	ENSSSCG00000006928	LMO4	LIM domain only 4 [Source:HGNC Symbol;Acc:HGNC:6644]	141341709	141354291	-	395	downstream
chr4	LNC_001448	XLOC_084672	--	Novel_lncRNA	141330630	141336970	+	ENSSSCT00000007590	ENSSSCG00000006928	LMO4	LIM domain only 4 [Source:HGNC Symbol;Acc:HGNC:6644]	141341709	141354291	-	4738	downstream
chr7	ALDBSSCT0000009842	ALDBSSCG0000005993	--	Annotated_lncRNA	80975985	80978808	+	ENSSSCT00000002263	ENSSSCG00000002023	PABPN1	poly(A) binding protein, nuclear 1 [Source:HGNC Symbol;Acc:HGNC:8565]	80984360	80988312	+	5551	upstream
chr7	ALDBSSCT0000009842	ALDBSSCG0000005993	--	Annotated_lncRNA	80975985	80978808	+	ENSSSCT00000002262	ENSSSCG00000002022	BCL2L2	BCL2 like 2 [Source:HGNC Symbol;Acc:HGNC:995]	80971090	80972334	+	3650	downstream
chr9	ALDBSSCT0000011057	ALDBSSCG0000006712	--	Annotated_lncRNA	7069079	7075060	+	ENSSSCT00000031648	ENSSSCG00000029426	--	--	7080946	7081310	-	5885	downstream
chr6	ENSSSCT00000021485	ENSSSCG00000019890	7SK	Annotated_lncRNA	86702443	86702771	-	ENSSSCT00000004038	ENSSSCG00000003642	INPP5B	inositol polyphosphate-5-phosphatase B [Source:HGNC Symbol;Acc:HGNC:6077]	86656665	86715040	-	-329	sense_overlapping
chr9	ALDBSSCT0000011502	ALDBSSCG0000006993	--	Annotated_lncRNA	43911234	43914778	-	ENSSSCT00000016383	ENSSSCG00000015019	COLCA2	colorectal cancer associated 2 [Source:HGNC Symbol;Acc:HGNC:26978]	43906148	43909875	-	1358	upstream
chr9	ALDBSSCT0000011501	ALDBSSCG0000006993	--	Annotated_lncRNA	43911234	43914497	-	ENSSSCT00000016383	ENSSSCG00000015019	COLCA2	colorectal cancer associated 2 [Source:HGNC Symbol;Acc:HGNC:26978]	43906148	43909875	-	1358	upstream
chr2	ALDBSSCT0000006140	ALDBSSCG0000003752	--	Annotated_lncRNA	3956092	3964460	-	ENSSSCT00000026537	ENSSSCG00000027956	SSH3	slingshot protein phosphatase 3 [Source:HGNC Symbol;Acc:HGNC:30581]	3968534	3976217	-	4073	downstream
chr2	ALDBSSCT0000006140	ALDBSSCG0000003752	--	Annotated_lncRNA	3956092	3964460	-	ENSSSCT00000014119	ENSSSCG00000012916	--	--	3944557	3947680	+	8411	downstream
chr9	ALDBSSCT0000011058	ALDBSSCG0000006713	--	Annotated_lncRNA	7389191	7400000	+	ENSSSCT00000016153	ENSSSCG00000014802	NUMA1	nuclear mitotic apparatus protein 1 [Source:HGNC Symbol;Acc:HGNC:8059]	7354090	7382435	-	6755	upstream
chrX	ENSSSCT00000034347	ENSSSCG00000030894	CH242-168N3.3	Annotated_lncRNA	12893483	12895094	+	ENSSSCT00000035270	ENSSSCG00000012136	PIR	pirin [Source:HGNC Symbol;Acc:HGNC:30048]	12894760	12993778	-	-335	antisense
chrX	ENSSSCT00000034347	ENSSSCG00000030894	CH242-168N3.3	Annotated_lncRNA	12893483	12895094	+	ENSSSCT00000013274	ENSSSCG00000012135	VEGFD	vascular endothelial growth factor D [Source:HGNC Symbol;Acc:HGNC:3708]	12853827	12894377	-	-895	antisense
chrX	ENSSSCT00000034347	ENSSSCG00000030894	CH242-168N3.3	Annotated_lncRNA	12893483	12895094	+	ENSSSCT00000035714	ENSSSCG00000012136	PIR	pirin [Source:HGNC Symbol;Acc:HGNC:30048]	12903084	12993643	-	7989	downstream
chrX	ENSSSCT00000034347	ENSSSCG00000030894	CH242-168N3.3	Annotated_lncRNA	12893483	12895094	+	ENSSSCT00000034866	ENSSSCG00000012136	PIR	pirin [Source:HGNC Symbol;Acc:HGNC:30048]	12899507	12994189	-	4412	downstream
chr4	ALDBSSCT0000007508	ALDBSSCG0000004554	--	Annotated_lncRNA	39651980	39654442	+	ENSSSCT00000006656	ENSSSCG00000006066	RNF19A	ring finger protein 19A, RBR E3 ubiquitin protein ligase [Source:HGNC Symbol;Acc:HGNC:13432]	39576526	39650587	+	1392	downstream
chr4	ALDBSSCT0000007509	ALDBSSCG0000004555	--	Annotated_lncRNA	39655149	39663978	+	ENSSSCT00000006658	ENSSSCG00000006067	--	--	39668745	39686887	-	4766	downstream
chr4	ALDBSSCT0000007509	ALDBSSCG0000004555	--	Annotated_lncRNA	39655149	39663978	+	ENSSSCT00000006656	ENSSSCG00000006066	RNF19A	ring finger protein 19A, RBR E3 ubiquitin protein ligase [Source:HGNC Symbol;Acc:HGNC:13432]	39576526	39650587	+	4561	downstream
[truncated: 743 more rows]

## Sheet: 100K
Chromosome	lncRNA_ID	lncRNA_Gene_ID	lncRNA_Gene_Symbol	lncRNA_Status	lncRNA_Start	lncRNA_End	lncRNA_Strand	mRNA_ID	mRNA_Gene_Id	mRNA_Gene_Symbol	mRNA_Gene_Description	mRNA_Start	mRNA_End	mRNA_Strand	Distance	Location
[truncated: 13,556 more rows]
